# Supplementary material for: Predicting medical device failure: a promise to reduce healthcare facilities cost through smart healthcare management
Source: PeerJ Comput Sci. 2023 Apr 3;9:e1279. doi: 10.7717/peerj-cs.1279 (PMC10280478; doi:10.7717/peerj-cs.1279)
Supplement: Supplemental Information 2 [file peerj-cs-09-1279-s002.xlsx]

## Sheet: raw data
-1.12976	2.26841	-0.29063	2.00015	2.23338	-0.0449093	-0.330369	0.658585	2	-0.106363	1.18831	China	Carestation 650 A1	Datex Ohmeda Inc	Carestation	PRK310	Ventilator
0.891888	-0.440785	-0.29063	2.00015	2.23338	-0.0449093	-0.323463	0.658585	2	-0.0436975	-0.928199	Australia	Ulco Ev500	Ulco Medical	Ulco	PRK300	Ventilator
2.37443	-0.440785	-0.29063	2.00015	2.23338	-0.0449093	-0.215093	0.658585	2	0.755648	-2.34106	Australia	Ulco El	Ulco Medical	Ulco	PRK300	Ventilator
2.37443	-0.440785	-0.29063	2.00015	2.23338	-0.0449093	-0.223674	0.658585	2	0.585146	-2.34106	Australia	Ulco El	Ulco Medical	Ulco	PRK300	Ventilator
1.43099	-0.440785	-0.29063	2.00015	2.23338	-0.0449093	-0.0709512	0.658585	2	0.916512	-1.51054	UK	Blease 8200p	Blease Medical Equipment Ltd	Blease	PRK300	Ventilator
0.891888	-0.440785	-0.29063	2.00015	2.23338	-0.0449093	-0.305923	0.658585	2	0.410706	-0.928199	Australia	Ulco A600	Ulco Medical	Ulco	PRK300	Ventilator
1.43099	2.26841	-0.29063	2.00015	2.23338	-0.0449093	-0.268357	0.658585	2	2.09869	-1.51202	USA	Smartvent 7900	Datex-Ohmeda Inc	Smartvent	PRK300	Ventilator
2.50921	2.26841	-0.29063	2.00015	2.23338	-0.0449093	0.326255	0.658585	2	0.00245258	-2.58405	USA	Ohmeda 7000 Basic	Ohmeda Boc Group Inc	Ohmeda	PRK300	Ventilator
2.50921	2.26841	-0.29063	2.00015	2.23338	-0.0449093	-0.314486	0.658585	2	0.139175	-2.58442	USA	Ohmeda 7000 Basic	Ohmeda Boc Group Inc	Ohmeda	PRK300	Ventilator
-0.186325	-0.440785	-0.29063	2.00015	2.23338	-0.0449093	-0.226611	0.658585	2	-0.106363	0.237219	USA	Aisys	Datex-Ohmeda Inc	Aisys	PRK358	Ventilator
-0.186325	-0.440785	-0.29063	2.00015	2.23338	-0.0449093	-0.031203	0.658585	2	-0.106363	0.237219	USA	Aisys	Datex-Ohmeda Inc	Aisys	PRK358	Ventilator
-0.186325	-0.440785	-0.29063	2.00015	2.23338	-0.0449093	0.92245	0.658585	2	-0.106363	0.234986	Germany	Primus	Drager Medical AG & Co KGaA	Draeger	PRK358	Ventilator
1.29622	2.26841	-0.29063	2.00015	2.23338	-0.0449093	-0.330369	0.658585	2	-0.106363	-1.36579	USA	Ohmeda 7000 Basic	Ohmeda Boc Group Inc	Ohmeda	PRK358	Ventilator
1.29622	2.26841	-0.29063	2.00015	2.23338	-0.0449093	-0.320471	0.658585	2	-0.106363	-1.36579	USA	Ohmeda 7000 Basic	Ohmeda Boc Group Inc	Ohmeda	PRK358	Ventilator
1.29622	2.26841	-0.29063	2.00015	2.23338	-0.0449093	-0.237172	0.658585	2	-0.106363	-1.36579	USA	Ohmeda 7000 Basic	Ohmeda Boc Group Inc	Ohmeda	PRK358	Ventilator
2.10488	-0.440785	-0.29063	2.00015	2.23338	-0.0449093	-0.32454	0.658585	2	-0.106363	-2.08097	Australia	Ulco Mk-5el	Ulco Engineering Pty Ltd	Ulco	PRK340	Ventilator
1.9701	-0.440785	2.21895	2.00015	2.23338	-0.0449093	-0.313335	0.658585	2	-0.106363	-2.04636	Australia	Ulco Ev500	Ulco Medical	Ulco	PRK340	Ventilator
1.43099	-0.440785	-0.29063	2.00015	2.23338	-0.0449093	-0.31165	0.658585	2	-0.106363	-1.45733	Australia	Ulco Ev500	Ulco Medical	Ulco	PRK340	Ventilator
1.43099	2.26841	-0.29063	2.00015	2.23338	-0.0449093	-0.309293	0.658585	2	-0.106363	-1.43165	USA	Smartvent 7900	Datex-Ohmeda Inc	Smartvent	PRK340	Ventilator
1.43099	2.26841	-0.29063	2.00015	2.23338	-0.0449093	-0.31153	0.658585	2	-0.106363	-1.43165	USA	Smartvent 7900	Datex-Ohmeda Inc	Smartvent	PRK340	Ventilator
-0.590655	-0.440785	-0.29063	2.00015	2.23338	-0.0449093	4.41072	0.658585	2	-0.106363	0.648762	China	Carestation 650 A1	Datex-Ohmeda Inc	Carestation	PRK360	Ventilator
-0.590655	-0.440785	-0.29063	2.00015	2.23338	-0.0449093	0.295668	0.658585	2	-0.106363	0.648762	China	Carestation 650 A1	Datex-Ohmeda Inc	Carestation	PRK360	Ventilator
-0.590655	-0.440785	-0.29063	2.00015	2.23338	-0.0449093	0.301947	0.658585	2	-0.106363	0.648762	China	Carestation 650 A1	Datex-Ohmeda Inc	Carestation	PRK360	Ventilator
1.02666	-0.440785	-0.29063	2.00015	2.23338	-0.0449093	-0.309109	0.658585	2	-0.106363	-0.995177	UK	Penlon Av900	Penlon Ltd	Penlon	PRK360	Ventilator
-0.0515487	2.26841	-0.29063	2.00015	2.23338	-0.0449093	-0.326502	0.658585	2	-0.106363	0.0731226	USA	Smartvent 7900	Datex-Ohmeda Inc	Smartvent	PRK360	Ventilator
-0.0515487	2.26841	-0.29063	2.00015	2.23338	-0.0449093	0.021638	0.658585	2	-0.106363	0.0731226	USA	Smartvent 7900	Datex-Ohmeda Inc	Smartvent	PRK360	Ventilator
-0.860208	-0.440785	-0.29063	0.412625	-0.372795	-0.0449093	-0.330369	0.658585	2	-0.106363	0.839277	USA	DeVilbiss 7310PR-S	DeVilbiss Health Care LLC	DeVilbiss	PRK312	Aspirators
-0.994985	-0.440785	-0.29063	0.412625	-0.372795	-0.0449093	-0.330369	0.658585	2	-0.106363	1.05286	Italy	New Askir 30	Ca-Mi Srl	New Askir	PRK312	Aspirators
-1.12976	-0.440785	-0.29063	0.412625	-0.372795	-0.0449093	-0.330369	0.658585	2	-0.106363	1.13063	China	Yuwell 7e-C/G	Jiangshu Yuyue Medical Equipment & Supply Co Ltd	Yuwell	PRK312	Aspirators
1.16144	-0.440785	-0.29063	0.412625	-0.372795	-0.0449093	-0.329825	0.658585	2	-0.103177	-1.22737	USA	Medi-Pump 1132	Thomas Industries Inc	Medi-Pump	PRK312	Aspirators
0.352781	-0.440785	-0.29063	0.412625	-0.372795	-0.0449093	-0.328297	0.658585	2	-0.105567	-0.414329	Germany	Leardal Suction	Laerdal Medical Corp	Laerdal	PRK312	Aspirators
1.16144	-0.440785	-0.29063	0.412625	-0.372795	-0.0449093	-0.329218	0.658585	2	-0.100507	-1.22737	USA	Medi-Pump 1132	Thomas Industries Inc	Medi-Pump	PRK312	Aspirators
1.9701	-0.440785	-0.29063	0.412625	-0.372795	-0.0449093	-0.330212	0.658585	2	-0.105567	-1.97529	USA	Medi-Pump 1132	Thomas Industries Inc	Medi-Pump	PRK312	Aspirators
-0.455879	-0.440785	-0.29063	0.412625	-0.372795	-0.0449093	-0.330369	0.658585	2	-0.104205	0.394245	Italy	Aspeed Professional	3a Health Care Srl	Aspeed	PRK312	Aspirators
-0.455879	-0.440785	-0.29063	0.412625	-0.372795	-0.0449093	-0.330369	0.658585	2	-0.106363	0.402431	Italy	Aspeed Professional	3a Health Care Srl	Aspeed	PRK312	Aspirators
1.83532	-0.440785	-0.29063	0.412625	-0.372795	-0.0449093	-0.263302	0.658585	2	-0.0961962	-1.79631	USA	Hms-2003sb	HMS	HMS	PRK312	Aspirators
1.9701	-0.440785	-0.29063	0.412625	-0.372795	-0.0449093	-0.325074	0.658585	2	-0.0969927	-1.98831	USA	Medi-Pump 1132	Thomas Industries Inc	Medi-Pump	PRK312	Aspirators
1.02666	-0.440785	-0.29063	0.412625	-0.372795	-0.0449093	-0.330369	0.658585	2	-0.106363	-1.04392	Brazil	Ns Aspiramax Ma-520	NS Industria de Aparelhos Medicos Ltda	NS	PRK312	Aspirators
1.02666	-0.440785	-0.29063	0.412625	-0.372795	-0.0449093	-0.330369	0.658585	2	-0.106363	-1.04392	Brazil	Ns Aspiramax Ma-520	NS Industria de Aparelhos Medicos Ltda	NS	PRK312	Aspirators
-0.455879	-0.440785	-0.29063	0.412625	-0.372795	-0.0449093	-0.330369	0.658585	2	-0.106363	0.394245	Italy	Aspeed Professional	3a Health Care Srl	Aspeed	PRK312	Aspirators
0.083228	-0.440785	-0.29063	0.412625	-0.372795	-0.0449093	-0.330369	0.658585	2	-0.106363	-0.151254	Germany	Simex M30d	Simex Medizintechnik Gmbh	Simex	PRK312	Aspirators
1.56577	-0.440785	-0.29063	0.412625	-0.372795	-0.0449093	-0.317018	0.658585	2	-0.0665383	-1.63928	USA	Medi-Pump 1132	Thomas Industries Inc	Medi-Pump	PRK312	Aspirators
1.56577	-0.440785	-0.29063	0.412625	-0.372795	-0.0449093	-0.310729	0.658585	2	-0.0395979	-1.63928	USA	Medi-Pump 1132	Thomas Industries Inc	Medi-Pump	PRK312	Aspirators
1.16144	-0.440785	-0.29063	0.412625	-0.372795	-0.0449093	-0.330212	0.658585	2	-0.0997962	-1.22737	USA	Medi-Pump 1132	Thomas Industries Inc	Medi-Pump	PRK312	Aspirators
1.56577	-0.440785	-0.29063	0.412625	-0.372795	-0.0449093	-0.324448	0.658585	2	-0.0747141	-1.63928	USA	Medi-Pump 1132	Thomas Industries Inc	Medi-Pump	PRK312	Aspirators
-0.455879	-0.440785	-0.29063	0.412625	-0.372795	-0.0449093	-0.329605	0.658585	2	-0.105567	0.394245	Italy	Aspeed Professional	3a Health Care Srl	Aspeed	PRK312	Aspirators
0.891888	-0.440785	-0.29063	0.412625	-0.372795	-0.0449093	-0.330369	0.658585	2	-0.1051	-0.9602	USA	Hms-2003sb	HMS	HMS	PRK312	Aspirators
2.10488	-0.440785	-0.29063	0.412625	-0.372795	-0.0449093	-0.313574	0.658585	2	-0.0294777	-2.18664	Australia	Clements Suc 84100	Clements Pty Ltd	Clements	PRK312	Aspirators
2.10488	-0.440785	-0.29063	0.412625	-0.372795	-0.0449093	-0.330369	0.658585	2	-0.106363	-2.18664	Australia	Clements Suc 84100	Clements Pty Ltd	Clements	PRK312	Aspirators
1.56577	-0.440785	-0.29063	0.412625	-0.372795	-0.0449093	-0.32454	0.658585	2	-0.077291	-1.63928	USA	Medi-Pump 1132	Thomas Industries Inc	Medi-Pump	PRK312	Aspirators
1.56577	-0.440785	-0.29063	0.412625	-0.372795	-0.0449093	-0.326612	0.658585	2	-0.0938535	-1.63928	USA	Medi-Pump 1132	Thomas Industries Inc	Medi-Pump	PRK312	Aspirators
1.56577	-0.440785	-0.29063	0.412625	-0.372795	-0.0449093	-0.327607	0.658585	2	-0.0970794	-1.64003	USA	Medi-Pump 1132	Thomas Industries Inc	Medi-Pump	PRK312	Aspirators
0.891888	-0.440785	-0.29063	0.412625	-0.372795	-0.0449093	-0.330369	0.658585	2	-0.106363	-0.9602	USA	Hms-2003sb	HMS	HMS	PRK312	Aspirators
1.43099	-0.440785	-0.29063	0.412625	-0.372795	-0.0449093	-0.328067	0.658585	2	-0.09465	-1.4536	USA	Medi-Pump 1132	Thomas Industries Inc	Medi-Pump	PRK312	Aspirators
-0.186325	-0.440785	-0.29063	0.412625	-0.372795	-0.0449093	-0.330369	0.658585	2	-0.106363	0.217125	USA	Medi-Pump 1132gl	Thomas Industries Inc	Medi-Pump	PRK312	Aspirators
0.891888	-0.440785	-0.29063	0.412625	-0.372795	-0.0449093	-0.327146	0.658585	2	-0.09465	-0.9602	USA	Hms-2003sb	HMS	HMS	PRK312	Aspirators
1.83532	-0.440785	-0.29063	0.412625	-0.372795	-0.0449093	-0.325065	0.658585	2	-0.0868022	-1.79631	USA	Medi-Pump 1132	Thomas Industries Inc	Medi-Pump	PRK312	Aspirators
0.891888	-0.440785	-0.29063	0.412625	-0.372795	-0.0449093	-0.281956	0.658585	2	-0.0727709	-0.885408	Not Available	Not Available	Not Available	Not Available	PRK312	Aspirators
2.64398	-0.440785	-0.29063	0.412625	-0.372795	-0.0449093	-0.330369	0.658585	2	-0.106363	-2.6514	Australia	Clements Suc 81500	Clements Pty Ltd	Clements	PRK312	Aspirators
0.352781	-0.440785	-0.29063	0.412625	-0.372795	-0.0449093	-0.328988	0.658585	2	0.119146	-0.330606	Norway	Laerdal Suction Unit	Laerdal Medical AS	LSU	PRK312	Aspirators
0.891888	-0.440785	-0.29063	0.412625	-0.372795	-0.0449093	-0.27704	0.658585	2	-0.0887934	-0.9602	USA	Hms-2003sb	HMS	HMS	PRK312	Aspirators
1.56577	-0.440785	-0.29063	0.412625	-0.372795	-0.0449093	-0.329291	0.658585	2	-0.100881	-1.63928	USA	Medi-Pump 1132	Thomas Industries Inc	Medi-Pump	PRK312	Aspirators
0.083228	-0.440785	-0.29063	0.412625	-0.372795	-0.0449093	-0.330369	0.658585	2	-0.106363	-0.0954388	Australia	Clements Hivac 84109	Clements Pty Ltd	Clements	PRK312	Aspirators
1.70055	-0.440785	-0.29063	0.412625	-0.372795	-0.0449093	-0.327607	0.658585	2	-0.0911361	-1.65045	USA	Medi-Pump 1132	Thomas Industries Inc	Medi-Pump	PRK312	Aspirators
0.352781	-0.440785	-0.29063	0.412625	-0.372795	-0.0449093	-0.329218	0.658585	2	-0.101678	-0.414329	Germany	Leardal Suction	Laerdal Medical Corp	Laerdal	PRK312	Aspirators
-0.186325	-0.440785	-0.29063	0.412625	-0.372795	-0.0449093	-0.329522	0.658585	2	-0.104021	0.217125	USA	Medi-Pump 1132gl	Thomas Industries Inc	Medi-Pump	PRK312	Aspirators
-0.455879	-0.440785	-0.29063	0.412625	-0.372795	-0.0449093	-0.330369	0.658585	2	-0.106363	0.394245	Italy	Aspeed Professional	3a Health Care Srl	Aspeed	PRK312	Aspirators
0.352781	-0.440785	-0.29063	0.412625	-0.372795	-0.0449093	-0.330369	0.658585	2	-0.105732	-0.414329	Germany	Leardal Suction	Laerdal Medical Corp	Laerdal	PRK312	Aspirators
1.9701	-0.440785	-0.29063	0.412625	-0.372795	-0.0449093	-0.328988	0.658585	2	-0.105626	-1.97417	USA	Medi-Pump 1132	Thomas Industries Inc	Medi-Pump	PRK312	Aspirators
0.891888	-0.440785	-0.29063	0.412625	-0.372795	-0.0449093	-0.330369	0.658585	2	-0.106363	-0.96206	USA	Hms-2003sb	HMS	HMS	PRK312	Aspirators
2.50921	-0.440785	-0.29063	0.412625	-0.372795	-0.0449093	-0.328988	0.658585	2	-0.0981294	-2.50032	Not Available	Not Available	Not Available	Not Available	PRK312	Aspirators
1.56577	-0.440785	-0.29063	0.412625	-0.372795	-0.0449093	-0.329144	0.658585	2	-0.100132	-1.63965	USA	Medi-Pump 1132	Thomas Industries Inc	Medi-Pump	PRK312	Aspirators
0.891888	-0.440785	-0.29063	0.412625	-0.372795	-0.0449093	-0.330369	0.658585	2	-0.106363	-0.888012	Italy	Vacumsol As/65-H	Alsa Apparecchi Medicali Srl	Vacumsol	PRK312	Aspirators
0.757111	-0.440785	-0.29063	0.412625	-0.372795	-0.0449093	-0.330369	0.658585	2	-0.106363	-0.774522	USA	Medi-Pump 1132gl	Thomas Industries Inc	Medi-Pump	PRK312	Aspirators
0.757111	-0.440785	-0.29063	0.412625	-0.372795	-0.0449093	-0.330369	0.658585	2	-0.106363	-0.774522	USA	Medi-Pump 1132gla	Thomas Industries Inc	Medi-Pump	PRK312	Aspirators
2.37443	-0.440785	4.72854	0.412625	-0.372795	-0.0449093	-0.329218	0.658585	2	-0.098164	-2.45716	Australia	Clements Suc 81500	Clements Pty Ltd	Clements	PRK312	Aspirators
-1.26454	-0.440785	-0.29063	0.412625	-0.372795	-0.0449093	-0.330369	0.658585	2	-0.106363	1.27984	Italy	Oscar Boscarol Ob2012	Oscar Boscarol Srl	Oscar Boscarol	PRK312	Aspirators
-1.26454	-0.440785	-0.29063	0.412625	-0.372795	-0.0449093	-0.330369	0.658585	2	-0.106363	1.27984	Italy	Boscarol Ob2012	Boscarol Srl	Boscarol	PRK312	Aspirators
-0.994985	-0.440785	-0.29063	0.412625	-0.372795	-0.0449093	-0.330369	0.658585	2	-0.106363	0.933418	USA	DeVilbiss 7310PR-S	DeVilbiss Health Care LLC	DeVilbiss	PRK310	Aspirators
-0.590655	-0.440785	-0.29063	0.412625	-0.372795	-0.0449093	-0.329301	0.658585	2	-0.105594	0.605226	Italy	Gima Super Vega	Gima SpA	Gima	PRK310	Aspirators
-0.590655	-0.440785	-0.29063	0.412625	-0.372795	-0.0449093	-0.329218	0.658585	2	-0.103988	0.643552	Spain	Hersill V7 Plus B	Hersill Sl	Hersill	PRK310	Aspirators
-0.590655	-0.440785	-0.29063	0.412625	-0.372795	-0.0449093	-0.330369	0.658585	2	-0.106363	0.643552	Spain	Hersill V7 Plus B	Hersill Sl	Hersill	PRK310	Aspirators
0.757111	-0.440785	-0.29063	0.412625	-0.372795	-0.0449093	-0.324246	0.658585	2	-0.0752061	-0.745126	Italy	Miniaspeed	3a Health Care Srl	Miniaspeed	PRK310	Aspirators
1.83532	-0.440785	-0.29063	0.412625	-0.372795	-0.0449093	-0.264205	0.658585	2	0.177987	-1.85324	Australia	Clements Suc 84100	Clements Pty Ltd	Clements	PRK310	Aspirators
0.083228	-0.440785	-0.29063	0.412625	-0.372795	-0.0449093	-0.154453	0.658585	2	-0.103501	-0.096183	UK	Oxylitre Ess200	Oxylitre Ltd	Oxylitre	PRK310	Aspirators
2.64398	-0.440785	-0.29063	0.412625	-0.372795	-0.0449093	-0.32756	0.658585	2	-0.0921903	-2.66107	Taiwan	Gemmy Su-305	Gemmy Ind Corp	Gemmy	PRK310	Aspirators
2.37443	-0.440785	-0.29063	0.412625	-0.372795	-0.0449093	-0.330295	0.658585	2	-0.105988	-2.37418	Germany	Egnell Compact 30 Ii	Ameda AG	Ameda	PRK310	Aspirators
-0.590655	-0.440785	-0.29063	0.412625	-0.372795	-0.0449093	-0.330369	0.658585	2	-0.106363	0.579551	Spain	Eurovac H-40	Hersill Sl	Eurovac	PRK310	Aspirators
1.43099	-0.440785	-0.29063	0.412625	-0.372795	-0.0449093	-0.309192	0.658585	2	-0.0148561	-1.40858	Australia	Clements Suc 84100	Clements Pty Ltd	Clements	PRK310	Aspirators
2.37443	-0.440785	2.21895	0.412625	-0.372795	-0.0449093	-0.328371	0.658585	2	-0.0958448	-2.34813	Australia	Clements Series 15	Clements Pty Ltd	Clements	PRK310	Aspirators
1.83532	-0.440785	-0.29063	0.412625	-0.372795	-0.0449093	-0.317644	0.658585	2	-0.0412536	-1.85547	Australia	Clements Suc 84100	Clements Pty Ltd	Clements	PRK310	Aspirators
0.218005	-0.440785	-0.29063	0.412625	-0.372795	-0.0449093	-0.330369	0.658585	2	-0.106363	-0.275535	UK	Oxylitre Ess200	Oxylitre Ltd	Oxylitre	PRK310	Aspirators
-0.590655	-0.440785	-0.29063	0.412625	-0.372795	-0.0449093	-0.312488	0.658585	2	-0.0866212	0.605226	Italy	Gima Super Vega	Gima SpA	Gima	PRK310	Aspirators
-0.590655	-0.440785	-0.29063	0.412625	-0.372795	-0.0449093	-0.330369	0.658585	2	-0.106363	0.643552	Spain	Hersill V7 Plus B	Hersill Sl	Hersill	PRK310	Aspirators
-0.590655	-0.440785	-0.29063	0.412625	-0.372795	-0.0449093	-0.330369	0.658585	2	-0.106363	0.643552	Spain	Hersill V7 Plus B	Hersill Sl	Hersill	PRK310	Aspirators
-0.590655	-0.440785	-0.29063	0.412625	-0.372795	-0.0449093	-0.330369	0.658585	2	-0.106363	0.643552	Spain	Hersill V7 Plus B	Hersill Sl	Hersill	PRK310	Aspirators
-0.186325	-0.440785	-0.29063	0.412625	-0.372795	-0.0449093	-0.223747	0.658585	2	-0.0903396	0.138984	Taiwan	Dolphin	Dolphin Medical	Dolphin	PRK310	Aspirators
0.218005	-0.440785	-0.29063	0.412625	-0.372795	-0.0449093	-0.330369	0.658585	2	-0.106363	-0.275535	UK	Oxylitre Ess200	Oxylitre Ltd	Oxylitre	PRK310	Aspirators
-0.321102	-0.440785	-0.29063	0.412625	-0.372795	-0.0449093	-0.328067	0.658585	2	-0.0954465	0.364849	Italy	New Askir 230-12 BR	Ca-Mi Snc	New Askir	PRK310	Aspirators
1.83532	-0.440785	2.21895	0.412625	-0.372795	-0.0449093	-0.318316	0.658585	2	0.0334165	-1.8391	Australia	Clements Suc 84100	Clements Pty Ltd	Clements	PRK310	Aspirators
1.29622	-0.440785	4.72854	0.412625	-0.372795	-0.0449093	-0.312129	0.658585	2	-0.0287749	-1.28021	Australia	Clements Suc 84100	Clements Pty Ltd	Clements	PRK310	Aspirators
-0.0515487	-0.440785	-0.29063	0.412625	-0.372795	-0.0449093	-0.326069	0.658585	2	-0.104202	0.0273543	Italy	Boscarol Ob2012	Oscar Boscarol Srl	Boscarol	PRK310	Aspirators
-0.455879	-0.440785	-0.29063	0.412625	-0.372795	-0.0449093	-0.330369	0.658585	2	-0.106363	0.416943	Italy	Boscarol Ob2012	Oscar Boscarol Srl	Boscarol	PRK310	Aspirators
-0.455879	-0.440785	-0.29063	0.412625	-0.372795	-0.0449093	-0.330369	0.658585	2	-0.106363	0.416943	Italy	Boscarol Ob2012	Oscar Boscarol Srl	Boscarol	PRK310	Aspirators
0.757111	-0.440785	-0.29063	0.412625	-0.372795	-0.0449093	-0.320701	0.658585	2	-0.0948843	-0.745126	Italy	Miniaspeed	3a Health Care Srl	Miniaspeed	PRK310	Aspirators
-0.994985	-0.440785	-0.29063	0.412625	-0.372795	-0.0449093	-0.330369	0.658585	2	-0.106363	0.933418	USA	DeVilbiss 7310PR-S	DeVilbiss Health Care LLC	DeVilbiss	PRK310	Aspirators
-0.994985	-0.440785	-0.29063	0.412625	-0.372795	-0.0449093	-0.013884	0.658585	2	-0.106363	0.933046	USA	DeVilbiss 7310PR-S	DeVilbiss Health Care LLC	DeVilbiss	PRK326	Aspirators
-0.994985	-0.440785	-0.29063	0.412625	-0.372795	-0.0449093	-0.330369	0.658585	2	-0.105833	0.933046	USA	DeVilbiss 7310PR-S	DeVilbiss Health Care LLC	DeVilbiss	PRK326	Aspirators
-0.994985	-0.440785	-0.29063	0.412625	-0.372795	-0.0449093	-0.330369	0.658585	2	-0.106363	1.00375	China	Dynmed Dx-24	Dynmed Medical Technology Co Ltd	Dynmed	PRK326	Aspirators
-0.455879	-0.440785	-0.29063	0.412625	-0.372795	-0.0449093	-0.330369	0.658585	2	-0.106363	0.410618	Italy	Boscarol Bsu 158	Oscar Boscarol Srl	Boscarol	PRK326	Aspirators
-1.26454	-0.440785	-0.29063	0.412625	-0.372795	-0.0449093	-0.330369	0.658585	2	-0.106363	1.26905	USA	70-30	Not Available	Not Available	PRK326	Aspirators
-0.321102	-0.440785	-0.29063	0.412625	-0.372795	-0.0449093	-0.328408	0.658585	2	-0.102849	0.328383	Italy	Boscarol Ob2012	Oscar Boscarol Srl	Boscarol	PRK326	Aspirators
0.218005	-0.440785	-0.29063	0.412625	-0.372795	-0.0449093	-0.271414	0.658585	2	-0.0911361	-0.228279	Italy	Boscarol Ob2012	Oscar Boscarol Srl	Boscarol	PRK326	Aspirators
-0.590655	-0.440785	-0.29063	0.412625	-0.372795	-0.0449093	-0.307534	0.658585	2	-0.104951	0.649506	Italy	Cormos Ob1000	Oscar Boscarol Srl	Boscarol	PRK326	Aspirators
-0.590655	-0.440785	-0.29063	0.412625	-0.372795	-0.0449093	-0.329908	0.658585	2	-0.10584	0.53676	Italy	Miniaspeed	3a Health Care Srl	Miniaspeed	PRK326	Aspirators
-0.455879	-0.440785	-0.29063	0.412625	-0.372795	-0.0449093	-0.259932	0.658585	2	-0.0975719	0.403548	Australia	Clements Hivac 84109	Clements Pty Ltd	Clements	PRK326	Aspirators
-0.590655	-0.440785	-0.29063	0.412625	-0.372795	-0.0449093	-0.330369	0.658585	2	-0.105833	0.609319	Spain	Hersill V7 Plus B	Hersill Sl	Hersill	PRK326	Aspirators
2.10488	-0.440785	-0.29063	0.412625	-0.372795	-0.0449093	-0.330369	0.658585	2	-0.106363	-2.12525	USA	Medi-Pump 1132d	Thomas Industries Inc	Medi-Pump	PRK326	Aspirators
0.487558	-0.440785	-0.29063	0.412625	-0.372795	-0.0449093	-0.326686	0.658585	2	-0.0876221	-0.55461	Australia	Clements Suc 81010	Clements Pty Ltd	Clements	PRK333	Aspirators
1.16144	-0.440785	-0.29063	0.412625	-0.372795	-0.0449093	-0.330369	0.658585	2	-0.105781	-1.2363	Germany	Medela Basic 30	Medela AG	Medela	PRK333	Aspirators
1.16144	-0.440785	-0.29063	0.412625	-0.372795	-0.0449093	-0.330093	0.658585	2	-0.0564064	-1.2363	Germany	Medela Basic 30	Medela AG	Medela	PRK333	Aspirators
1.56577	-0.440785	-0.29063	0.412625	-0.372795	-0.0449093	-0.330369	0.658585	2	-0.106363	-1.63482	USA	Sunrise Vacu-Aide 73041	Sunrise Medical Inc	Sunrise	PRK333	Aspirators
0.487558	-0.440785	-0.29063	0.412625	-0.372795	-0.0449093	-0.0553908	0.658585	2	-0.0574488	-0.55461	USA	Clement Suc 87010	Clement Clarke International	Clement	PRK333	Aspirators
-0.590655	-0.440785	-0.29063	0.412625	-0.372795	-0.0449093	-0.330369	0.658585	2	-0.106363	0.606714	UK	Oxylitre Psp002	Oxylitre Ltd	Oxylitre	PRK333	Aspirators
-0.590655	-0.440785	-0.29063	0.412625	-0.372795	-0.0449093	-0.223407	0.658585	2	-0.100272	0.606714	UK	Oxylitre Psp002	Oxylitre Ltd	Oxylitre	PRK333	Aspirators
-0.590655	-0.440785	-0.29063	0.412625	-0.372795	-0.0449093	-0.265844	0.658585	2	-0.0418767	0.537132	UK	Oxylitre Elite	Oxylitre Ltd	Oxylitre	PRK333	Aspirators
0.487558	-0.440785	-0.29063	0.412625	-0.372795	-0.0449093	-0.328223	0.658585	2	-0.0962899	-0.554983	Australia	Clements Suc 84109	Clements Pty Ltd	Clements	PRK333	Aspirators
0.891888	-0.440785	-0.29063	0.412625	-0.372795	-0.0449093	-0.326916	0.658585	2	-0.0988375	-0.966525	Australia	Clements Suc 84109	Clements Pty Ltd	Clements	PRK333	Aspirators
0.487558	-0.440785	-0.29063	0.412625	-0.372795	-0.0449093	-0.325489	0.658585	2	-0.0966138	-0.554983	Australia	Clements Suc 84109	Clements Pty Ltd	Clements	PRK333	Aspirators
0.891888	-0.440785	-0.29063	0.412625	-0.372795	-0.0449093	-0.146608	0.658585	2	-0.0864209	-0.966525	Australia	Clements Suc 84109	Clements Pty Ltd	Clements	PRK333	Aspirators
-0.725432	-0.440785	-0.29063	0.412625	-0.372795	-0.0449093	-0.330369	0.658585	2	-0.106363	0.784578	Italy	Boscarol Bsu158	Oscar Boscarol Srl	Boscarol	PRK333	Aspirators
-0.725432	-0.440785	-0.29063	0.412625	-0.372795	-0.0449093	-0.330369	0.658585	2	-0.106363	0.688576	Italy	Boscarol Bsu158	Oscar Boscarol Srl	Boscarol	PRK333	Aspirators
-0.186325	-0.440785	2.21895	0.412625	-0.372795	-0.0449093	-0.330369	0.658585	2	-0.106363	0.157589	Italy	Boscarol Ob2012	Oscar Boscarol Srl	Boscarol	PRK333	Aspirators
1.16144	-0.440785	-0.29063	0.412625	-0.372795	-0.0449093	-0.330369	0.658585	2	-0.106363	-1.12169	Germany	Medela Basic 30	Medela AG	Medela	PRK333	Aspirators
-0.725432	-0.440785	-0.29063	0.412625	-0.372795	-0.0449093	-0.329282	0.658585	2	-0.106363	0.783834	Taiwan	Vac Pro	Apex Medical Corp	Apex	PRK333	Aspirators
-0.994985	-0.440785	-0.29063	0.412625	-0.372795	-0.0449093	-0.330369	0.658585	2	-0.106363	0.933046	USA	Vacu-Aide 7310pr	DeVilbiss Healthcare	Vacu-Aide	PRK333	Aspirators
-0.994985	-0.440785	-0.29063	0.412625	-0.372795	-0.0449093	-0.330369	0.658585	2	-0.106363	0.933046	USA	Vacu-Aide 7310pr	DeVilbiss Healthcare	Vacu-Aide	PRK333	Aspirators
-0.860208	-0.440785	-0.29063	0.412625	-0.372795	-0.0449093	-0.330369	0.658585	2	-0.106363	0.839277	USA	DeVilbiss 7310PR-S	DeVilbiss Health Care LLC	DeVilbiss	PRK319	Aspirators
1.29622	-0.440785	-0.29063	0.412625	-0.372795	-0.0449093	-0.326686	0.658585	2	-0.086685	-1.36653	UK	Mge Sam 14	Mg Electric Ltd	MGE	PRK319	Aspirators
0.218005	-0.440785	-0.29063	0.412625	-0.372795	-0.0449093	-0.330369	0.658585	2	-0.106363	-0.187348	Italy	Aspeed Professional	3a Health Care Srl	Aspeed	PRK319	Aspirators
0.622335	-0.440785	-0.29063	0.412625	-0.372795	-0.0449093	-0.329015	0.658585	2	-0.103543	-0.678892	Australia	Suc 84100	Clements Medical Equipment Pty Ltd	Clement	PRK319	Aspirators
0.218005	-0.440785	-0.29063	0.412625	-0.372795	-0.0449093	-0.329908	0.658585	2	-0.100672	-0.191441	Italy	Aspeed Professional	3a Health Care Srl	Aspeed	PRK319	Aspirators
0.891888	-0.440785	-0.29063	0.412625	-0.372795	-0.0449093	-0.328527	0.658585	2	-0.0923074	-0.960944	Australia	Clements Hivac 84109	Clements Pty Ltd	Clements	PRK319	Aspirators
0.218005	-0.440785	-0.29063	0.412625	-0.372795	-0.0449093	-0.330369	0.658585	2	-0.106363	-0.191441	Italy	Aspeed Professional	3a Health Care Srl	Aspeed	PRK319	Aspirators
-0.590655	-0.440785	-0.29063	0.412625	-0.372795	-0.0449093	-0.330369	0.658585	2	-0.105427	0.605226	Spain	Hersill V7 Plus B	Hersill Sl	Hersill	PRK319	Aspirators
-0.725432	-0.440785	-0.29063	0.412625	-0.372795	-0.0449093	-0.1941	0.658585	2	-0.104453	0.688576	Italy	Boscarol Bsu158	Oscar Boscarol Srl	Boscarol	PRK330	Aspirators
-0.725432	-0.440785	-0.29063	0.412625	-0.372795	-0.0449093	-0.330369	0.658585	2	-0.106363	0.768206	Italy	Cormos Ob1000	Oscar Boscarol Srl	Boscarol	PRK330	Aspirators
1.16144	-0.440785	2.21895	0.412625	-0.372795	-0.0449093	-0.312718	0.658585	2	-0.00113167	-1.17937	Australia	Clements Suc 84100	Clements Pty Ltd	Clements	PRK330	Aspirators
0.218005	-0.440785	-0.29063	0.412625	-0.372795	-0.0449093	-0.329218	0.658585	2	-0.0975783	-0.269582	Italy	Boscarol Bsu 220	Oscar Boscarol Srl	Boscarol	PRK330	Aspirators
0.218005	-0.440785	-0.29063	0.412625	-0.372795	-0.0449093	-0.169755	0.658585	2	-0.0234717	-0.269582	Italy	Boscarol Bsu 220	Oscar Boscarol Srl	Boscarol	PRK330	Aspirators
-0.455879	-0.440785	-0.29063	0.412625	-0.372795	-0.0449093	-0.330369	0.658585	2	-0.106363	0.423269	Italy	Boscarol Bsu158	Oscar Boscarol Srl	Boscarol	PRK330	Aspirators
-0.0515487	-0.440785	-0.29063	0.412625	-0.372795	-0.0449093	-0.330369	0.658585	2	-0.106363	-0.00427422	USA	Medi-Pump 1632gl	Thomas Industries Inc	Medi-Pump	PRK330	Aspirators
-0.590655	-0.440785	-0.29063	0.412625	-0.372795	-0.0449093	-0.329835	0.658585	2	-0.105948	0.636482	Norway	Laerdal Suction Unit	Laerdal Medical AS	LSU	PRK330	Aspirators
0.083228	-0.440785	-0.29063	0.412625	-0.372795	-0.0449093	-0.330369	0.658585	2	-0.106363	-0.0310654	UK	Oxylitre Ess5200	Oxylitre Ltd	Oxylitre	PRK330	Aspirators
-0.0515487	-0.440785	-0.29063	0.412625	-0.372795	-0.0449093	-0.330369	0.658585	2	-0.106363	-0.00427422	USA	Medi-Pump 1632gl	Thomas Industries Inc	Medi-Pump	PRK330	Aspirators
-0.725432	-0.440785	-0.29063	0.412625	-0.372795	-0.0449093	-0.330369	0.658585	2	-0.106363	0.765973	Spain	Hersill V7 Plus B	Hersill Sl	Hersill	PRK330	Aspirators
-0.725432	-0.440785	-0.29063	0.412625	-0.372795	-0.0449093	-0.330369	0.658585	2	-0.106363	0.765973	Spain	Hersill V7 Plus B	Hersill Sl	Hersill	PRK330	Aspirators
-0.725432	-0.440785	-0.29063	0.412625	-0.372795	-0.0449093	-0.330369	0.658585	2	-0.106363	0.768578	Italy	New Hospivac 400	Ca-Mi Snc	Hospivac	PRK330	Aspirators
1.02666	-0.440785	-0.29063	0.412625	-0.372795	-0.0449093	-0.330369	0.658585	2	-0.106363	-0.988851	USA	Medi-Pump 1132gl	Thomas Industries Inc	Medi-Pump	PRK330	Aspirators
-0.725432	-0.440785	-0.29063	0.412625	-0.372795	-0.0449093	-0.330369	0.658585	2	-0.106363	0.765973	Spain	Hersill V7 Plus B	Hersill Sl	Hersill	PRK330	Aspirators
-0.590655	-0.440785	-0.29063	0.412625	-0.372795	-0.0449093	-0.330369	0.658585	2	-0.105495	0.536387	Italy	Tecno 70	Tecno-Gaz Industries	Tecno-Gaz	PRK330	Aspirators
0.083228	-0.440785	-0.29063	0.412625	-0.372795	-0.0449093	-0.329908	0.658585	2	-0.104021	-0.0586009	Taiwan	Respicare Ydx-100m-35a	Respicare Corporation Sdn Bhd	Respicare	PRK330	Aspirators
0.891888	-0.440785	-0.29063	0.412625	-0.372795	-0.0449093	-0.328914	0.658585	2	-0.098164	-0.88057	Japan	Power Smile Ks-700	Koushin Industries Inc	Shin-Ei	PRK330	Aspirators
1.43099	-0.440785	2.21895	0.412625	-0.372795	-0.0449093	-0.322699	0.658585	2	-0.0501632	-1.49937	USA	Vacu-Max 605	Medical Industries America Inc	Vacu-Max	PRK330	Aspirators
-0.860208	-0.440785	-0.29063	0.412625	-0.372795	-0.0449093	-0.329835	0.658585	2	-0.105909	0.839277	USA	Vacu-Aide 7310pr	DeVilbiss Healthcare	Vacu-Aide	PRK330	Aspirators
-0.321102	-0.440785	-0.29063	0.412625	-0.372795	-0.0449093	-0.314643	0.658585	2	-0.105358	0.328755	Italy	Boscarol Ob2012	Oscar Boscarol Srl	Boscarol	PRK330	Aspirators
-0.590655	-0.440785	-0.29063	0.412625	-0.372795	-0.0449093	-0.330369	0.658585	2	-0.106363	0.604482	Germany	Accuvac Basic	Weinmann GmbH + Co KG	Accuvac	PRK342	Aspirators
-0.590655	-0.440785	-0.29063	0.412625	-0.372795	-0.0449093	-0.330369	0.658585	2	-0.106363	0.604482	Germany	Accuvac Basic	Weinmann GmbH + Co KG	Accuvac	PRK342	Aspirators
0.218005	-0.440785	-0.29063	0.412625	-0.372795	-0.0449093	-0.109917	0.658585	2	-0.104137	-0.207069	Italy	Maxiaspeed	3a Health Care Srl	Maxiaspeed	PRK342	Aspirators
0.757111	-0.440785	-0.29063	0.412625	-0.372795	-0.0449093	-0.329218	0.658585	2	-0.100507	-0.700102	USA	Maxi Aspirator 601	Medical Industries Equipment	Maxi	PRK342	Aspirators
0.622335	-0.440785	-0.29063	0.412625	-0.372795	-0.0449093	-0.330369	0.658585	2	-0.106363	-0.69452	USA	Maxi Aspirator 601	Medical Industries Equipment	Maxi Aspirator	PRK342	Aspirators
0.757111	-0.440785	-0.29063	0.412625	-0.372795	-0.0449093	-0.32722	0.658585	2	-0.0848578	-0.73694	South Korea	World Medical Tsa-40	World of Medicine AG	World Medical	PRK342	Aspirators
-0.590655	-0.440785	-0.29063	0.412625	-0.372795	-0.0449093	-0.330369	0.658585	2	-0.106363	0.604482	Spain	Hersill V7 Plus Ac	Hersill Sl	Hersill	PRK342	Aspirators
0.352781	-0.440785	-0.29063	0.412625	-0.372795	-0.0449093	-0.329338	0.658585	2	-0.101678	-0.41805	UK	Clement Suc 81000	Clement Clarke International	Clement	PRK342	Aspirators
1.29622	-0.440785	-0.29063	0.412625	-0.372795	-0.0449093	-0.327376	0.658585	2	-0.069695	-1.36579	USA	Medi-Pump 1242	Thomas Industries Inc	Medi-Pump	PRK342	Aspirators
-0.590655	-0.440785	-0.29063	0.412625	-0.372795	-0.0449093	-0.330369	0.658585	2	-0.106363	0.604482	Germany	Accuvac Basic	Weinmann GmbH + Co KG	Accuvac	PRK342	Aspirators
1.16144	-0.440785	-0.29063	0.412625	-0.372795	-0.0449093	-0.328988	0.658585	2	-0.098164	-1.13769	UK	Eschmann VP 35	Eschmann Bros & Walsh Ltd	Eschmann	PRK342	Aspirators
-0.994985	-0.440785	-0.29063	0.412625	-0.372795	-0.0449093	-0.330369	0.658585	2	-0.106363	0.933046	Italy	Spencer SC75560D-Ambu Jet P 1000B 10G	Spencer Italia Srl	Spencer	PRK342	Aspirators
-0.994985	-0.440785	-0.29063	0.412625	-0.372795	-0.0449093	-0.330369	0.658585	2	-0.106363	0.933046	Italy	Spencer SC75560D-Ambu Jet P 1000B 10G	Spencer Italia Srl	Spencer	PRK342	Aspirators
-1.12976	-0.440785	-0.29063	0.412625	-0.372795	-0.0449093	-0.330369	0.658585	2	-0.106363	1.0711	Spain	Hersill V7 Plus B	Hersill Sl	Hersill	PRK342	Aspirators
-1.12976	-0.440785	-0.29063	0.412625	-0.372795	-0.0449093	-0.330369	0.658585	2	-0.106363	1.17752	Spain	Hersill V7 Plus B	Hersill Sl	Hersill	PRK300	Aspirators
-1.12976	-0.440785	-0.29063	0.412625	-0.372795	-0.0449093	-0.330369	0.658585	2	-0.106363	1.17566	Italy	Aspeed	3a Health Care Srl	3a Health Care	PRK300	Aspirators
-1.12976	-0.440785	-0.29063	0.412625	-0.372795	-0.0449093	-0.330369	0.658585	2	-0.106363	1.19054	Spain	Hersill V7 Plus B	Hersill Sl	Hersill	PRK300	Aspirators
-1.12976	-0.440785	-0.29063	0.412625	-0.372795	-0.0449093	-0.330369	0.658585	2	-0.106363	1.19054	Spain	Hersill V7 Plus B	Hersill Sl	Hersill	PRK300	Aspirators
-1.12976	-0.440785	-0.29063	0.412625	-0.372795	-0.0449093	-0.330369	0.658585	2	-0.106363	1.19054	Spain	Hersill V7 Plus B	Hersill Sl	Hersill	PRK300	Aspirators
-1.12976	-0.440785	-0.29063	0.412625	-0.372795	-0.0449093	-0.330369	0.658585	2	-0.106363	1.17193	Italy	Boscarol Ob1000	Oscar Boscarol Srl	Boscarol	PRK300	Aspirators
-0.994985	-0.440785	-0.29063	0.412625	-0.372795	-0.0449093	-0.330369	0.658585	2	-0.106363	0.933418	Italy	Spencer SC75560D-Ambu Jet P 1000B 10G	Spencer Italia Srl	Spencer	PRK300	Aspirators
-0.994985	-0.440785	-0.29063	0.412625	-0.372795	-0.0449093	-0.330369	0.658585	2	-0.106363	0.933418	Italy	Spencer SC75560D-Ambu Jet P 1000B 10G	Spencer Italia Srl	Spencer	PRK300	Aspirators
-0.994985	-0.440785	-0.29063	0.412625	-0.372795	-0.0449093	-0.330369	0.658585	2	-0.106363	0.933418	Italy	Spencer SC75560D-Ambu Jet P 1000B 10G	Spencer Italia Srl	Spencer	PRK300	Aspirators
0.083228	-0.440785	-0.29063	0.412625	-0.372795	-0.0449093	-0.330369	0.658585	2	-0.106363	-0.0210187	Germany	Medela Basic 30	Medela AG	Medela	PRK300	Aspirators
-0.0515487	-0.440785	-0.29063	0.412625	-0.372795	-0.0449093	-0.330369	0.658585	2	-0.106363	-0.0158093	China	Phlegm 7E-A	Phlegm	Phlegm	PRK300	Aspirators
-0.590655	-0.440785	-0.29063	0.412625	-0.372795	-0.0449093	-0.330369	0.658585	2	-0.106363	0.534527	Germany	Accuvac Basic	Weinmann GmbH & Co KG	Accuvac	PRK300	Aspirators
-0.321102	-0.440785	-0.29063	0.412625	-0.372795	-0.0449093	-0.330369	0.658585	2	-0.106363	0.299732	Australia	Clement Hivac 84109	Clements Pty Ltd	Clement	PRK300	Aspirators
-0.994985	-0.440785	-0.29063	0.412625	-0.372795	-0.0449093	-0.330369	0.658585	2	-0.106363	1.04765	Norway	Laerdal Suction Unit	Laerdal Medical AS	Laerdal	PRK300	Aspirators
-0.994985	-0.440785	-0.29063	0.412625	-0.372795	-0.0449093	-0.330369	0.658585	2	-0.106363	1.04765	Australia	CeeVac SUC 81030	BMDi TUTA Healthcare Pty Ltd	Clements	PRK300	Aspirators
-1.12976	-0.440785	-0.29063	0.412625	-0.372795	-0.0449093	-0.330369	0.658585	2	-0.106363	1.07444	China	Dynmed DX-18	Dynmed Medical Technology Co Ltd	Dynmed	PRK300	Aspirators
-1.12976	-0.440785	-0.29063	0.412625	-0.372795	-0.0449093	-0.330369	0.658585	2	-0.106363	1.07444	China	Dynmed DX-18	Dynmed Medical Technology Co Ltd	Dynmed	PRK300	Aspirators
-1.12976	-0.440785	-0.29063	0.412625	-0.372795	-0.0449093	-0.330369	0.658585	2	-0.106363	1.07444	China	Dynmed DX-18	Dynmed Medical Technology Co Ltd	Dynmed	PRK300	Aspirators
-1.12976	-0.440785	-0.29063	0.412625	-0.372795	-0.0449093	-0.330369	0.658585	2	-0.106363	1.07147	USA	Spencer SC75560D-Ambu Jet P 1000B 10G	DeVilbiss Health Care LLC	Spencer	PRK300	Aspirators
-1.12976	-0.440785	-0.29063	0.412625	-0.372795	-0.0449093	-0.330369	0.658585	2	-0.106363	1.07147	USA	Spencer SC75560D-Ambu Jet P 1000B 10G	DeVilbiss Health Care LLC	Spencer	PRK300	Aspirators
-1.12976	-0.440785	-0.29063	0.412625	-0.372795	-0.0449093	-0.330369	0.658585	2	-0.106363	1.07147	USA	Spencer SC75560D-Ambu Jet P 1000B 10G	DeVilbiss Health Care LLC	Spencer	PRK300	Aspirators
-0.860208	-0.440785	-0.29063	0.412625	-0.372795	-0.0449093	-0.330369	0.658585	2	-0.106363	0.797974	Italy	Boscarol Ob2012	Oscar Boscarol Srl	Boscarol	PRK300	Aspirators
1.83532	-0.440785	-0.29063	0.412625	-0.372795	-0.0449093	0.161968	0.658585	2	0.369124	-1.90868	Australia	Clements Suc 84100	Clements Pty Ltd	Clements	PRK300	Aspirators
2.37443	-0.440785	-0.29063	0.412625	-0.372795	-0.0449093	-0.320195	0.658585	2	-0.0476285	-2.38237	Japan	Olympus Endorinse	Olympus Optical Co Ltd	Olympus	PRK300	Aspirators
0.622335	-0.440785	-0.29063	0.412625	-0.372795	-0.0449093	-0.330369	0.658585	2	-0.106363	-0.690055	Germany	Karl Storz 203303 20	Karl Storz Gmbh	Karl Storz	PRK300	Aspirators
-0.186325	-0.440785	-0.29063	0.412625	-0.372795	-0.0449093	-0.330369	0.658585	2	-0.106363	0.118147	Germany	Erbe Esm 2	Erbe Elektromedizin GmbH	Erbe	PRK300	Aspirators
-0.455879	-0.440785	-0.29063	0.412625	-0.372795	-0.0449093	-0.329245	0.658585	2	-0.106363	0.396106	China	Yuyue 7e-A	Jiangshu Yuyue Medical Equipment & Supply Co Ltd	Yuyue	PRK300	Aspirators
-0.455879	-0.440785	-0.29063	0.412625	-0.372795	-0.0449093	-0.0429332	0.658585	2	-0.106363	0.396106	China	Yuyue 7e-A	Jiangshu Yuyue Medical Equipment & Supply Co Ltd	Yuyue	PRK300	Aspirators
1.02666	-0.440785	-0.29063	0.412625	-0.372795	-0.0449093	-0.324844	0.658585	2	-0.0759089	-1.00001	USA	Medi-Pump 1132gl	Thomas Industries Inc	Medi-Pump	PRK300	Aspirators
0.622335	-0.440785	-0.29063	0.412625	-0.372795	-0.0449093	-0.326796	0.658585	2	-0.0887934	-0.593681	Italy	Askir 20	Ca-Mi Snc	Askir	PRK300	Aspirators
0.757111	-0.440785	-0.29063	0.412625	-0.372795	-0.0449093	1.49879	0.658585	2	-0.0297986	-0.700846	Italy	New Askir 30	Ca-Mi Snc	New Askir	PRK300	Aspirators
-0.321102	-0.440785	-0.29063	0.412625	-0.372795	-0.0449093	-0.330369	0.658585	2	-0.106363	0.33657	Germany	DeVilbiss 7305P-I	DeVilbiss Healthcare GmbH	DeVilbiss	PRK300	Aspirators
1.16144	-0.440785	-0.29063	0.412625	-0.372795	-0.0449093	-0.330369	0.658585	2	-0.106363	-1.11202	Italy	Markos Mefar Sp20	Markos Mefar SpA	Markos Mefar	PRK300	Aspirators
1.16144	-0.440785	-0.29063	0.412625	-0.372795	-0.0449093	-0.261746	0.658585	2	-0.057402	-1.11202	Italy	Markos Mefar Sp30	Markos Mefar SpA	Markos Mefar	PRK300	Aspirators
1.16144	-0.440785	-0.29063	0.412625	-0.372795	-0.0449093	-0.330369	0.658585	2	-0.106363	-1.11202	USA	Medi-Pump 1132	Thomas Industries Inc	Medi-Pump	PRK300	Aspirators
1.83532	-0.440785	-0.29063	0.412625	-0.372795	-0.0449093	-0.326225	0.658585	2	-0.0533609	-1.90608	USA	Gomco 300	Allied Healthcare Product Inc	Gomco	PRK300	Aspirators
0.083228	-0.440785	-0.29063	0.412625	-0.372795	-0.0449093	0.604796	0.658585	2	-0.106363	-0.096183	Germany	Accuvac Basic Vw 10700	Weinmann GmbH + Co KG	Accuvac	PRK300	Aspirators
1.16144	-0.440785	-0.29063	0.412625	-0.372795	-0.0449093	-0.191043	0.658585	2	-0.00255482	-1.23146	UK	Clement Suc 82643	Clement Clarke International	Clement	PRK300	Aspirators
2.50921	-0.440785	-0.29063	0.412625	-0.372795	-0.0449093	-0.326225	0.658585	2	-0.0923074	-2.58256	UK	Eschmann VP 35	Eschmann Bros & Walsh Ltd	Eschmann	PRK300	Aspirators
0.487558	-0.440785	-0.29063	0.412625	-0.372795	-0.0449093	-0.315637	0.658585	2	-0.029056	-0.428841	UK	Eschmann VP 25	Eschmann Bros & Walsh Ltd	Eschmann	PRK300	Aspirators
0.083228	-0.440785	-0.29063	0.412625	-0.372795	-0.0449093	-0.184395	0.658585	2	-0.106363	-0.096183	Germany	Accuvac Basic Vw 10700	Weinmann GmbH + Co KG	Accuvac	PRK300	Aspirators
0.083228	-0.440785	-0.29063	0.412625	-0.372795	-0.0449093	-0.328988	0.658585	2	-0.106363	-0.096183	Germany	Accuvac Basic Vw 10700	Weinmann GmbH + Co KG	Accuvac	PRK300	Aspirators
1.16144	-0.440785	-0.29063	0.412625	-0.372795	-0.0449093	-0.320471	0.658585	2	0.143787	-1.12169	Switzerland	Vario 026	Medela AG	Vario	PRK300	Aspirators
0.757111	-0.440785	-0.29063	0.412625	-0.372795	-0.0449093	-0.326686	0.658585	2	-0.0595104	-0.7388	Italy	Markos Mefar Sp30	Markos Mefar SpA	Markos Mefar	PRK300	Aspirators
-0.0515487	-0.440785	-0.29063	0.412625	-0.372795	-0.0449093	-0.32652	0.658585	2	-0.106363	-0.00948362	Germany	Accuvac Basic Vw 10700	Weinmann GmbH + Co KG	Accuvac	PRK300	Aspirators
-0.0515487	-0.440785	-0.29063	0.412625	-0.372795	-0.0449093	-0.326483	0.658585	2	-0.106363	-0.00948362	Germany	Accuvac Basic Vw 10700	Weinmann GmbH + Co KG	Accuvac	PRK300	Aspirators
-0.0515487	-0.440785	-0.29063	0.412625	-0.372795	-0.0449093	-0.328527	0.658585	2	-0.106363	-0.00948362	Germany	Accuvac Basic Vw 10700	Weinmann GmbH + Co KG	Accuvac	PRK300	Aspirators
-0.455879	-0.440785	2.21895	0.412625	-0.372795	-0.0449093	-0.326382	0.658585	2	-0.106363	0.396106	China	Yuyue 7e-A	Jiangshu Yuyue Medical Equipment & Supply Co Ltd	Yuyue	PRK300	Aspirators
-0.455879	-0.440785	-0.29063	0.412625	-0.372795	-0.0449093	-0.155981	0.658585	2	-0.106363	0.396106	China	Yuyue 7e-A	Jiangshu Yuyue Medical Equipment & Supply Co Ltd	Yuyue	PRK300	Aspirators
-0.455879	-0.440785	-0.29063	0.412625	-0.372795	-0.0449093	-0.330369	0.658585	2	-0.106363	0.519271	Germany	Accuvac Basic	Weinmann GmbH + Co KG	Accuvac	PRK300	Aspirators
-0.455879	-0.440785	-0.29063	0.412625	-0.372795	-0.0449093	-0.330369	0.658585	2	-0.106363	0.396106	China	Yuyue 7e-A	Jiangshu Yuyue Medical Equipment & Supply Co Ltd	Yuyue	PRK300	Aspirators
-0.455879	-0.440785	-0.29063	0.412625	-0.372795	-0.0449093	-0.330369	0.658585	2	-0.106363	0.396106	China	Yuyue 7e-A	Jiangshu Yuyue Medical Equipment & Supply Co Ltd	Yuyue	PRK300	Aspirators
-0.455879	-0.440785	2.21895	0.412625	-0.372795	-0.0449093	-0.286542	0.658585	2	-0.106363	0.396106	China	Yuyue 7e-A	Jiangshu Yuyue Medical Equipment & Supply Co Ltd	Yuyue	PRK300	Aspirators
-0.0515487	-0.440785	-0.29063	0.412625	-0.372795	-0.0449093	-0.293171	0.658585	2	-0.106363	-0.0150651	Germany	Accuvac Basic Vw 10700	Weinmann GmbH + Co KG	Accuvac	PRK300	Aspirators
0.218005	-0.440785	-0.29063	0.412625	-0.372795	-0.0449093	-0.325305	0.658585	2	0.140859	-0.288187	Italy	Aspeed Professional	3a Health Care Srl	Aspeed	PRK300	Aspirators
0.487558	-0.440785	-0.29063	0.412625	-0.372795	-0.0449093	-0.330369	0.658585	2	-0.106363	-0.428841	UK	Eschmann VP 25	Eschmann Bros & Walsh Ltd	Eschmann	PRK300	Aspirators
2.37443	-0.440785	-0.29063	0.412625	-0.372795	-0.0449093	-0.327607	0.658585	2	-0.106363	-2.39502	USA	Schuco 9711-133	Allied Healthcare Product Inc	Schuco	PRK300	Aspirators
0.218005	-0.440785	-0.29063	0.412625	-0.372795	-0.0449093	0.0487722	0.658585	2	-0.0219753	-0.198138	Italy	Maxiaspeed	3a Health Care Srl	Maxiaspeed	PRK300	Aspirators
-0.321102	-0.440785	-0.29063	0.412625	-0.372795	-0.0449093	-0.328988	0.658585	2	-0.106363	0.328383	Italy	Boscarol 2012 Fa	Oscar Boscarol Srl	Boscarol	PRK300	Aspirators
2.50921	-0.440785	-0.29063	0.412625	-0.372795	-0.0449093	-0.314689	0.658585	2	-0.0265962	-2.58591	UK	Eschmann VP 25	Eschmann Bros & Walsh Ltd	Eschmann	PRK300	Aspirators
0.757111	-0.440785	-0.29063	0.412625	-0.372795	-0.0449093	-0.328527	0.658585	2	-0.0876221	-0.712381	Norway	Laerdal Suction Unit	Laerdal Medical AS	LSU	PRK300	Aspirators
0.757111	-0.440785	-0.29063	0.412625	-0.372795	-0.0449093	-0.326225	0.658585	2	-0.0759089	-0.712381	Norway	Laerdal Suction Unit	Laerdal Medical AS	LSU	PRK300	Aspirators
0.757111	-0.440785	-0.29063	0.412625	-0.372795	-0.0449093	-0.328297	0.658585	2	-0.0841081	-0.712381	Italy	Boscarol 2012 Fa	Oscar Boscarol Srl	Boscarol	PRK300	Aspirators
0.757111	-0.440785	-0.29063	0.412625	-0.372795	-0.0449093	-0.325148	0.658585	2	-0.0395979	-0.712381	Italy	Boscarol 2012 Fa	Oscar Boscarol Srl	Boscarol	PRK300	Aspirators
-0.455879	-0.440785	-0.29063	0.412625	-0.372795	-0.0449093	-0.258183	0.658585	2	-0.106363	0.427734	Italy	Boscarol Ob2012	Oscar Boscarol Srl	Boscarol	PRK300	Aspirators
0.352781	-0.440785	-0.29063	0.412625	-0.372795	-0.0449093	-0.310877	0.658585	2	-0.0847711	-0.293396	Italy	Boscarol Xas0220	Oscar Boscarol Srl	Boscarol	PRK300	Aspirators
0.352781	-0.440785	-0.29063	0.412625	-0.372795	-0.0449093	-0.317018	0.658585	2	0.129805	-0.293396	Italy	Boscarol Xas0220	Oscar Boscarol Srl	Boscarol	PRK300	Aspirators
-0.0515487	-0.440785	-0.29063	0.412625	-0.372795	-0.0449093	-0.328527	0.658585	2	-0.106363	0.0273543	Italy	Boscarol Ob2012	Oscar Boscarol Srl	Boscarol	PRK300	Aspirators
1.02666	-0.440785	-0.29063	0.412625	-0.372795	-0.0449093	-0.324844	0.658585	2	-0.061853	-0.989596	USA	Medi-Pump 1134dc	Thomas Industries Inc	Medi-Pump	PRK300	Aspirators
0.352781	-0.440785	-0.29063	0.412625	-0.372795	-0.0449093	-0.330369	0.658585	2	-0.106363	-0.416189	UK	Eschmann VP 25	Eschmann Bros & Walsh Ltd	Eschmann	PRK300	Aspirators
0.487558	-0.440785	-0.29063	0.412625	-0.372795	-0.0449093	-0.330369	0.658585	2	-0.106363	-0.559448	Taiwan	Harmony Vcp8101	Harmony	Harmony	PRK300	Aspirators
1.02666	-0.440785	-0.29063	0.412625	-0.372795	-0.0449093	-0.320931	0.658585	2	-0.0502862	-1.10197	UK	Clement Suc 84109	Clement Clarke International	Clement	PRK300	Aspirators
1.70055	-0.440785	2.21895	0.412625	-0.372795	-0.0449093	-0.324154	0.658585	2	-0.0759089	-1.70291	Germany	Atmos Rp 25 3ltr	Atmos MedizinTechnik GmbH & Co KG	Atmos	PRK300	Aspirators
2.50921	-0.440785	-0.29063	0.412625	-0.372795	-0.0449093	-0.326686	0.658585	2	-0.0914734	-2.5833	UK	Eschmann VP 25	Eschmann Bros & Walsh Ltd	Eschmann	PRK300	Aspirators
2.10488	-0.440785	4.72854	0.412625	-0.372795	-0.0449093	-0.314946	0.658585	2	-0.0132431	-2.09287	Australia	Clements Suc 84100	Clements Pty Ltd	Clements	PRK300	Aspirators
2.10488	-0.440785	4.72854	0.412625	-0.372795	-0.0449093	-0.311724	0.658585	2	0.0166256	-2.09287	Australia	Clements Suc 84100	Clements Pty Ltd	Clements	PRK300	Aspirators
2.50921	-0.440785	2.21895	0.412625	-0.372795	-0.0449093	-0.328527	0.658585	2	-0.0917217	-2.58293	UK	Eschmann VP 25	Eschmann Bros & Walsh Ltd	Eschmann	PRK300	Aspirators
0.218005	-0.440785	-0.29063	0.412625	-0.372795	-0.0449093	-0.186715	0.658585	2	-0.0774978	-0.288187	UK	Aerosol Sam 14	Aerosol Products Ltd	Aerosol	PRK300	Aspirators
0.622335	-0.440785	-0.29063	0.412625	-0.372795	-0.0449093	-0.327376	0.658585	2	-0.0882078	-0.576936	USA	Medi-Pump 1632gl	Thomas Industries Inc	Medi-Pump	PRK300	Aspirators
0.622335	-0.440785	2.21895	0.412625	-0.372795	-0.0449093	-0.330369	0.658585	2	-0.106363	-0.576936	Italy	Markos Mefar Sp20	Markos Mefar SpA	Markos Mefar	PRK300	Aspirators
1.70055	-0.440785	2.21895	0.412625	-0.372795	-0.0449093	-0.0610533	0.658585	2	1.25003	-1.64896	USA	Medi-Pump 1132	Thomas Industries Inc	Medi-Pump	PRK300	Aspirators
1.56577	-0.440785	2.21895	0.412625	-0.372795	-0.0449093	-0.299524	0.658585	2	0.0607007	-1.64747	USA	Medi-Pump 1132	Thomas Industries Inc	Medi-Pump	PRK300	Aspirators
0.757111	-0.440785	2.21895	0.412625	-0.372795	-0.0449093	-0.329218	0.658585	2	-0.0975783	-0.723544	USA	Medi-Pump 1132gla	Thomas Industries Inc	Medi-Pump	PRK300	Aspirators
0.622335	-0.440785	2.21895	0.412625	-0.372795	-0.0449093	-0.330369	0.658585	2	-0.106363	-0.576936	Italy	Markos Mefar Sp20	Markos Mefar SpA	Markos Mefar	PRK300	Aspirators
0.757111	-0.440785	2.21895	0.412625	-0.372795	-0.0449093	-0.327146	0.658585	2	-0.0374163	-0.723544	USA	Medi-Pump 1132gl	Thomas Industries Inc	Medi-Pump	PRK300	Aspirators
0.757111	-0.440785	2.21895	0.412625	-0.372795	-0.0449093	-0.326916	0.658585	2	-0.0846938	-0.723544	USA	Medi-Pump 1132gla	Thomas Industries Inc	Medi-Pump	PRK300	Aspirators
1.70055	-0.440785	-0.29063	0.412625	-0.372795	-0.0449093	-0.328527	0.658585	2	-0.0950975	-1.77026	USA	Medtek Ppss 602	Medtek Devices Inc	Medtek	PRK300	Aspirators
-0.590655	-0.440785	-0.29063	0.412625	-0.372795	-0.0449093	-0.330369	0.658585	2	-0.106363	0.576574	Australia	Clements Hivac 84109	Clements Pty Ltd	Clements	PRK300	Aspirators
1.83532	-0.440785	-0.29063	0.412625	-0.372795	-0.0449093	-0.327607	0.658585	2	-0.0969927	-1.83873	USA	Itkavac Ws-85	Instrumentairum Corp Itka	Itkavac	PRK300	Aspirators
-0.455879	-0.440785	-0.29063	0.412625	-0.372795	-0.0449093	-0.330369	0.658585	2	-0.106363	0.398338	Germany	Accuvac Basic	Weinmann GmbH + Co KG	Accuvac	PRK300	Aspirators
2.23965	-0.440785	-0.29063	0.412625	-0.372795	-0.0449093	-0.265761	0.658585	2	-0.0854991	-2.2365	Australia	Clements Suc 84100	Clements Pty Ltd	Clements	PRK300	Aspirators
1.02666	-0.440785	2.21895	0.412625	-0.372795	-0.0449093	-0.328988	0.658585	2	-0.106363	-1.04802	UK	Eschmann VP 35	Eschmann Bros & Walsh Ltd	Eschmann	PRK300	Aspirators
0.891888	-0.440785	2.21895	0.412625	-0.372795	-0.0449093	-0.321787	0.658585	2	-0.0629669	-0.860849	Australia	Clements Hivac 84109	Clements Pty Ltd	Clements	PRK300	Aspirators
-0.590655	-0.440785	-0.29063	0.412625	-0.372795	-0.0449093	-0.330369	0.658585	2	-0.106363	0.599644	Taiwan	Phlegm 7E-A	Meiko Commerce Co Ltd	Phlegm	PRK300	Aspirators
0.487558	-0.440785	-0.29063	0.412625	-0.372795	-0.0449093	-0.323924	0.658585	2	-0.0571127	-0.479818	UK	Eschmann VP 25	Eschmann Bros & Walsh Ltd	Eschmann	PRK300	Aspirators
1.02666	-0.440785	-0.29063	0.412625	-0.372795	-0.0449093	-0.313105	0.658585	2	0.00491236	-1.04802	UK	Eschmann VP 35	Eschmann Bros & Walsh Ltd	Eschmann	PRK300	Aspirators
2.50921	-0.440785	-0.29063	0.412625	-0.372795	-0.0449093	-0.330093	0.658585	2	-0.104958	-2.52414	Australia	Clements Suc 81500	Clements Pty Ltd	Clements	PRK300	Aspirators
-0.321102	-0.440785	-0.29063	0.412625	-0.372795	-0.0449093	-0.330369	0.658585	2	-0.106363	0.258801	USA	DeVilbiss 7305-P	DeVilbiss Health Care Inc	DeVilbiss	PRK300	Aspirators
-0.0515487	-0.440785	-0.29063	0.412625	-0.372795	-0.0449093	-0.327754	0.658585	2	-0.106363	-0.0150651	Germany	Accuvac Basic Vw 10700	Weinmann GmbH + Co KG	Accuvac	PRK300	Aspirators
-0.455879	-0.440785	-0.29063	0.412625	-0.372795	-0.0449093	-0.0591934	0.658585	2	-0.106363	0.473875	Germany	Accuvac Basic	Weinmann GmbH + Co KG	Accuvac	PRK300	Aspirators
0.622335	-0.440785	-0.29063	0.412625	-0.372795	-0.0449093	-0.327146	0.658585	2	-0.0869708	-0.591076	Switzerland	Vario 026	Medela AG	Vario	PRK300	Aspirators
2.10488	-0.440785	-0.29063	0.412625	-0.372795	-0.0449093	-0.319937	0.658585	2	0.034415	-2.11073	Switzerland	Medela Basic 036	Medela AG	Medela	PRK300	Aspirators
1.29622	-0.440785	-0.29063	0.412625	-0.372795	-0.0449093	-0.202847	0.658585	2	-0.025542	-1.34756	USA	Medi-Pump 1132	Thomas Industries Inc	Medi-Pump	PRK300	Aspirators
0.487558	-0.440785	-0.29063	0.412625	-0.372795	-0.0449093	-0.32699	0.658585	2	-0.0394515	-0.55982	Italy	Miniaspeed	3a Health Care Srl	Miniaspeed	PRK300	Aspirators
1.9701	-0.440785	-0.29063	0.412625	-0.372795	-0.0449093	0.693334	0.658585	2	0.154082	-1.96301	Switzerland	Medela Basic 036	Medela AG	Medela	PRK300	Aspirators
1.9701	-0.440785	-0.29063	0.412625	-0.372795	-0.0449093	0.525097	0.658585	2	0.177383	-2.01473	Switzerland	Median 04613	Medela AG	Medela	PRK300	Aspirators
-0.455879	-0.440785	-0.29063	0.412625	-0.372795	-0.0449093	-0.330369	0.658585	2	-0.106363	0.518527	UK	Oxylitre Ess200	Oxylitre Ltd	Oxylitre	PRK300	Aspirators
-0.455879	-0.440785	-0.29063	0.412625	-0.372795	-0.0449093	-0.330369	0.658585	2	-0.106363	0.518527	UK	Oxylitre Ess200	Oxylitre Ltd	Oxylitre	PRK300	Aspirators
0.352781	-0.440785	-0.29063	0.412625	-0.372795	-0.0449093	-0.328527	0.658585	2	-0.0969927	-0.303815	Italy	Gima 28232	Gima SpA	Gima	PRK300	Aspirators
1.16144	-0.440785	-0.29063	0.412625	-0.372795	-0.0449093	-0.329218	0.658585	2	-0.100507	-1.24002	UK	Mge Sam 12	Mg Electric Ltd	MGE	PRK300	Aspirators
1.9701	-0.440785	-0.29063	0.412625	-0.372795	-0.0449093	-0.327146	0.658585	2	-0.0682566	-2.03371	USA	Medi-Pump 1132	Thomas Industries Inc	Medi-Pump	PRK300	Aspirators
2.37443	-0.440785	2.21895	0.412625	-0.372795	-0.0449093	-0.320931	0.658585	2	-0.0677096	-2.36525	UK	Clement Suc 82660	Clement Clarke International	Clement	PRK300	Aspirators
0.352781	-0.440785	4.72854	0.412625	-0.372795	-0.0449093	-0.299524	0.658585	2	0.414436	-0.416189	UK	Eschmann VP 25	Eschmann Bros & Walsh Ltd	Eschmann	PRK300	Aspirators
1.02666	-0.440785	2.21895	0.412625	-0.372795	-0.0449093	-0.304358	0.658585	2	0.0424679	-1.04802	UK	Eschmann VP 35	Eschmann Bros & Walsh Ltd	Eschmann	PRK300	Aspirators
2.23965	-0.440785	2.21895	0.412625	-0.372795	-0.0449093	-0.307028	0.658585	2	0.0538104	-2.24655	USA	Medi-Pump 1132d	Thomas Industries Inc	Medi-Pump	PRK300	Aspirators
2.37443	-0.440785	-0.29063	0.412625	-0.372795	-0.0449093	-0.315563	0.658585	2	0.00398818	-2.39948	USA	Medi-Pump 1132	Thomas Industries Inc	Medi-Pump	PRK300	Aspirators
1.02666	-0.440785	2.21895	0.412625	-0.372795	-0.0449093	-0.323924	0.658585	2	-0.0712236	-1.03946	UK	Eschmann VP 35	Eschmann Bros & Walsh Ltd	Eschmann	PRK300	Aspirators
1.56577	-0.440785	2.21895	0.412625	-0.372795	-0.0449093	-0.306844	0.658585	2	0.0165084	-1.56672	Switzerland	Vario 026	Medela AG	Vario	PRK300	Aspirators
-0.994985	-0.440785	-0.29063	0.412625	-0.372795	-0.0449093	-0.154711	0.658585	2	-0.106363	0.933046	USA	DeVilbiss 7310PR-S	DeVilbiss Health Care LLC	DeVilbiss	PRK341	Aspirators
-0.994985	-0.440785	-0.29063	0.412625	-0.372795	-0.0449093	-0.330369	0.658585	2	-0.106363	0.933046	USA	DeVilbiss 7310PR-S	DeVilbiss Health Care LLC	DeVilbiss	PRK341	Aspirators
-0.725432	-0.440785	-0.29063	0.412625	-0.372795	-0.0449093	-0.330369	0.658585	2	-0.106363	0.782346	Italy	New Askir 230-12 BR	Ca-Mi Snc	New Askir	PRK341	Aspirators
1.56577	-0.440785	-0.29063	0.412625	-0.372795	-0.0449093	-0.328988	0.658585	2	-0.106363	-1.62254	USA	Thoracic Md 210461801	Datex-Ohmeda Inc	Thoracic	PRK341	Aspirators
-0.725432	-0.440785	-0.29063	0.412625	-0.372795	-0.0449093	-0.330369	0.658585	2	-0.106363	0.688576	Italy	Boscarol Bsu158	Oscar Boscarol Srl	Boscarol	PRK341	Aspirators
-0.0515487	-0.440785	-0.29063	0.412625	-0.372795	-0.0449093	-0.327607	0.658585	2	-0.106363	0.0325637	Italy	Boscarol Ob2012	Oscar Boscarol Srl	Boscarol	PRK341	Aspirators
1.70055	-0.440785	-0.29063	0.412625	-0.372795	-0.0449093	-0.314716	0.658585	2	-0.106363	-1.67835	USA	Medi-Pump 1134dc	Thomas Industries Inc	Medi-Pump	PRK341	Aspirators
1.56577	-0.440785	-0.29063	0.412625	-0.372795	-0.0449093	-0.166247	0.658585	2	-0.106363	-1.54105	USA	Medi-Pump 1134dc	Thomas Industries Inc	Medi-Pump	PRK341	Aspirators
1.56577	-0.440785	-0.29063	0.412625	-0.372795	-0.0449093	-0.323924	0.658585	2	-0.106363	-1.62254	USA	Thoracic Md 210461801	Datex-Ohmeda Inc	Thoracic	PRK341	Aspirators
1.56577	-0.440785	-0.29063	0.412625	-0.372795	-0.0449093	-0.085683	0.658585	2	-0.106363	-1.62254	USA	Thoracic Md 210461801	Datex-Ohmeda Inc	Thoracic	PRK341	Aspirators
1.56577	-0.440785	-0.29063	0.412625	-0.372795	-0.0449093	-0.329448	0.658585	2	-0.106363	-1.62254	USA	Thoracic Md 210461801	Datex-Ohmeda Inc	Thoracic	PRK341	Aspirators
2.64398	-0.440785	-0.29063	0.412625	-0.372795	-0.0449093	-0.329908	0.658585	2	-0.106363	-2.66554	Germany	Aesculap Gf 80/Gf84	B Braun Melsungen AG	Aesculap	PRK341	Aspirators
2.64398	-0.440785	-0.29063	0.412625	-0.372795	-0.0449093	-0.118139	0.658585	2	-0.106363	-2.66554	Germany	Aesculap Gf 90/Gf92	B Braun Melsungen AG	Aesculap	PRK341	Aspirators
2.64398	-0.440785	-0.29063	0.412625	-0.372795	-0.0449093	-0.329908	0.658585	2	-0.106363	-2.66554	Germany	Aesculap Gf 90/Gf92	B Braun Melsungen AG	Aesculap	PRK341	Aspirators
2.64398	-0.440785	-0.29063	0.412625	-0.372795	-0.0449093	-0.330139	0.658585	2	-0.106363	-2.65437	Germany	Aesculap Gf 80/Gf84	B Braun Melsungen AG	Aesculap	PRK341	Aspirators
2.64398	-0.440785	-0.29063	0.412625	-0.372795	-0.0449093	-0.221878	0.658585	2	-0.106363	-2.64507	Germany	Aesculap Gf 80/Gf84	B Braun Melsungen AG	Aesculap	PRK341	Aspirators
-0.590655	-0.440785	-0.29063	0.412625	-0.372795	-0.0449093	-0.330369	0.658585	2	-0.106363	0.602621	Italy	New Askir 30	Ca-Mi Snc	New Askir	PRK341	Aspirators
2.64398	-0.440785	-0.29063	0.412625	-0.372795	-0.0449093	-0.330369	0.658585	2	-0.106363	-2.64507	Germany	Aesculap Gf 80/Gf84	B Braun Melsungen AG	Aesculap	PRK341	Aspirators
-0.725432	-0.440785	-0.29063	0.412625	-0.372795	-0.0449093	-0.330369	0.658585	2	-0.106363	0.782346	Italy	New Askir 230-12 BR	Ca-Mi Snc	New Askir	PRK341	Aspirators
1.56577	-0.440785	-0.29063	0.412625	-0.372795	-0.0449093	-0.329908	0.658585	2	-0.106363	-1.62254	USA	Thoracic Md 210461801	Datex-Ohmeda Inc	Thoracic	PRK341	Aspirators
1.83532	-0.440785	-0.29063	0.412625	-0.372795	-0.0449093	-0.329448	0.658585	2	-0.106363	-1.86961	UK	Eschmann VP 35	Eschmann Bros & Walsh Ltd	Eschmann	PRK341	Aspirators
1.02666	-0.440785	-0.29063	0.412625	-0.372795	-0.0449093	-0.328988	0.658585	2	-0.106363	-0.985503	USA	Medi-Pump 1132gl	Thomas Industries Inc	Medi-Pump	PRK341	Aspirators
-0.590655	-0.440785	-0.29063	0.412625	-0.372795	-0.0449093	-0.330369	0.658585	2	-0.106363	0.651738	Australia	Clements Suc 84112	Clements Medical Equipment Pty Ltd	Clements	PRK358	Aspirators
-0.994985	-0.440785	-0.29063	0.412625	-0.372795	-0.0449093	-0.330369	0.658585	2	-0.106363	0.933418	Italy	Spencer SC75560D-Ambu Jet P 1000B 10G	Spencer Italia Srl	Spencer	PRK358	Aspirators
-0.994985	-0.440785	-0.29063	0.412625	-0.372795	-0.0449093	-0.330369	0.658585	2	-0.106363	0.933418	Italy	Spencer SC75560D-Ambu Jet P 1000B 10G	Spencer Italia Srl	Spencer	PRK358	Aspirators
1.29622	-0.440785	-0.29063	0.412625	-0.372795	-0.0449093	-0.326299	0.658585	2	-0.106363	-1.36579	Switzerland	Master 45	Ameda AG	Ameda-Egnell	PRK358	Aspirators
0.757111	-0.440785	-0.29063	0.412625	-0.372795	-0.0449093	-0.315407	0.658585	2	-0.106363	-0.700846	Italy	Boscarol 2012 Fa	Oscar Boscarol Srl	Boscarol	PRK358	Aspirators
0.083228	-0.440785	-0.29063	0.412625	-0.372795	-0.0449093	-0.330369	0.658585	2	-0.106363	-0.146044	Italy	Boscarol Ob2012	Oscar Boscarol Srl	Boscarol	PRK358	Aspirators
-0.0515487	-0.440785	-0.29063	0.412625	-0.372795	-0.0449093	-0.330369	0.658585	2	-0.106363	-0.00278582	USA	Medi-Pump 1632gl	Thomas Industries Inc	Medi-Pump	PRK358	Aspirators
1.29622	-0.440785	-0.29063	0.412625	-0.372795	-0.0449093	-0.324384	0.658585	2	-0.106363	-1.36579	Switzerland	Medela Basic 036	Medela AG	Medela	PRK358	Aspirators
1.29622	-0.440785	-0.29063	0.412625	-0.372795	-0.0449093	-0.329218	0.658585	2	-0.106363	-1.36579	Switzerland	Medela Basic 036	Medela AG	Medela	PRK358	Aspirators
1.29622	-0.440785	-0.29063	0.412625	-0.372795	-0.0449093	-0.327607	0.658585	2	-0.106363	-1.36579	Switzerland	Medela Basic 036	Medela AG	Medela	PRK358	Aspirators
1.29622	-0.440785	-0.29063	0.412625	-0.372795	-0.0449093	-0.326143	0.658585	2	-0.106363	-1.36579	Switzerland	Medela Basic 036	Medela AG	Medela	PRK358	Aspirators
-0.590655	-0.440785	-0.29063	0.412625	-0.372795	-0.0449093	-0.330369	0.658585	2	-0.106363	0.593691	Switzerland	Medela Clario	Medela AG	Medela	PRK358	Aspirators
1.29622	-0.440785	-0.29063	0.412625	-0.372795	-0.0449093	-0.328527	0.658585	2	-0.106363	-1.2523	Switzerland	Medela Basic 036	Medela AG	Medela	PRK358	Aspirators
1.29622	-0.440785	-0.29063	0.412625	-0.372795	-0.0449093	-0.294303	0.658585	2	-0.106363	-1.36579	Switzerland	Vario 026	Medela AG	Vario	PRK358	Aspirators
1.29622	-0.440785	-0.29063	0.412625	-0.372795	-0.0449093	-0.323472	0.658585	2	-0.106363	-1.36579	Switzerland	Medela Basic 036	Medela AG	Medela	PRK358	Aspirators
1.9701	-0.440785	-0.29063	0.412625	-0.372795	-0.0449093	-0.32001	0.658585	2	-0.106363	-1.98496	USA	Medi-Pump 1132	Thomas Industries Inc	Medi-Pump	PRK358	Aspirators
-0.455879	-0.440785	-0.29063	0.412625	-0.372795	-0.0449093	-0.330369	0.658585	2	-0.106363	0.506619	Italy	Miniaspeed Battery Plus	3a Health Care Srl	Miniaspeed Battery	PRK358	Aspirators
0.083228	-0.440785	-0.29063	0.412625	-0.372795	-0.0449093	-0.306126	0.658585	2	-0.106363	-0.108462	Spain	Hersill V7 Plus B	Hersill Sl	Hersill	PRK358	Aspirators
1.29622	-0.440785	-0.29063	0.412625	-0.372795	-0.0449093	-0.329678	0.658585	2	-0.106363	-1.36579	Switzerland	Vario 026	Medela AG	Vario	PRK358	Aspirators
1.29622	-0.440785	-0.29063	0.412625	-0.372795	-0.0449093	-0.304772	0.658585	2	-0.106363	-1.36579	Switzerland	Master 45	Ameda AG	Ameda-Egnell	PRK358	Aspirators
1.29622	-0.440785	-0.29063	0.412625	-0.372795	-0.0449093	-0.321852	0.658585	2	-0.106363	-1.36579	Switzerland	Master 45	Ameda AG	Ameda-Egnell	PRK358	Aspirators
1.29622	-0.440785	-0.29063	0.412625	-0.372795	-0.0449093	-0.295068	0.658585	2	-0.106363	-1.36579	Switzerland	Master 45	Ameda AG	Ameda-Egnell	PRK358	Aspirators
1.29622	-0.440785	-0.29063	0.412625	-0.372795	-0.0449093	-0.328527	0.658585	2	-0.106363	-1.36579	Switzerland	Medela Basic 036	Medela AG	Medela	PRK358	Aspirators
1.29622	-0.440785	-0.29063	0.412625	-0.372795	-0.0449093	-0.328757	0.658585	2	-0.106363	-1.36579	Switzerland	Vario 026	Medela AG	Vario	PRK358	Aspirators
1.29622	-0.440785	-0.29063	0.412625	-0.372795	-0.0449093	-0.32362	0.658585	2	-0.106363	-1.36579	Switzerland	Medela Basic 036	Medela AG	Medela	PRK358	Aspirators
1.29622	-0.440785	-0.29063	0.412625	-0.372795	-0.0449093	-0.330369	0.658585	2	-0.106363	-1.36579	Switzerland	Medela Basic 036	Medela AG	Medela	PRK358	Aspirators
1.29622	-0.440785	-0.29063	0.412625	-0.372795	-0.0449093	-0.326456	0.658585	2	-0.106363	-1.36579	Switzerland	Medela Basic 036	Medela AG	Medela	PRK358	Aspirators
1.29622	-0.440785	-0.29063	0.412625	-0.372795	-0.0449093	-0.327763	0.658585	2	-0.106363	-1.36579	Switzerland	Medela Basic 036	Medela AG	Medela	PRK358	Aspirators
1.29622	-0.440785	-0.29063	0.412625	-0.372795	-0.0449093	-0.324071	0.658585	2	-0.106363	-1.36579	Switzerland	Medela Basic 036	Medela AG	Medela	PRK358	Aspirators
1.29622	-0.440785	-0.29063	0.412625	-0.372795	-0.0449093	-0.328527	0.658585	2	-0.106363	-1.36579	Switzerland	Medela Basic 036	Medela AG	Medela	PRK358	Aspirators
1.29622	-0.440785	-0.29063	0.412625	-0.372795	-0.0449093	-0.330369	0.658585	2	-0.106363	-1.36579	Switzerland	Medela Basic 036	Medela AG	Medela	PRK358	Aspirators
1.29622	-0.440785	-0.29063	0.412625	-0.372795	-0.0449093	-0.330369	0.658585	2	-0.106363	-1.36579	Switzerland	Medela Basic 036	Medela AG	Medela	PRK358	Aspirators
1.29622	-0.440785	-0.29063	0.412625	-0.372795	-0.0449093	-0.330369	0.658585	2	-0.106363	-1.36579	Switzerland	Medela Basic 036	Medela AG	Medela	PRK358	Aspirators
1.29622	-0.440785	-0.29063	0.412625	-0.372795	-0.0449093	-0.330369	0.658585	2	-0.106363	-1.36579	USA	Medi-Pump 1240	Thomas Industries Inc	Medi-Pump	PRK358	Aspirators
1.43099	-0.440785	2.21895	0.412625	-0.372795	-0.0449093	-0.328527	0.658585	2	-0.106363	-1.47891	Norway	Laerdal Asa-79-00-09	Asmund S Laerdal	Laerdal	PRK358	Aspirators
1.43099	-0.440785	2.21895	0.412625	-0.372795	-0.0449093	-0.315637	0.658585	2	-0.106363	-1.47891	Norway	Laerdal Asa-79-00-09	Asmund S Laerdal	Laerdal	PRK358	Aspirators
1.43099	-0.440785	2.21895	0.412625	-0.372795	-0.0449093	-0.326456	0.658585	2	-0.106363	-1.47891	Norway	Laerdal Asa-79-00-09	Asmund S Laerdal	Laerdal	PRK358	Aspirators
1.29622	-0.440785	2.21895	0.412625	-0.372795	-0.0449093	-0.323924	0.658585	2	-0.106363	-1.36579	Norway	Laerdal Asa-79-00-09	Asmund S Laerdal	Laerdal	PRK358	Aspirators
-0.0515487	-0.440785	-0.29063	0.412625	-0.372795	-0.0449093	-0.328371	0.658585	2	-0.106363	-0.00278582	USA	Medi-Pump 1632gl	Thomas Industries Inc	Medi-Pump	PRK358	Aspirators
1.29622	-0.440785	2.21895	0.412625	-0.372795	-0.0449093	-0.323233	0.658585	2	-0.106363	-1.36579	Norway	Laerdal Asa-79-00-09	Asmund S Laerdal	Laerdal	PRK358	Aspirators
-0.725432	-0.440785	-0.29063	0.412625	-0.372795	-0.0449093	-0.330369	0.658585	2	-0.106363	0.768578	USA	DeVilbiss 7310PR-S	DeVilbiss Health Care LLC	DeVilbiss	PRK320	Aspirators
-0.725432	-0.440785	-0.29063	0.412625	-0.372795	-0.0449093	-0.330369	0.658585	2	-0.106363	0.734345	USA	DeVilbiss 7310PR-S	DeVilbiss Health Care LLC	DeVilbiss	PRK320	Aspirators
-0.860208	-0.440785	-0.29063	0.412625	-0.372795	-0.0449093	-0.329908	0.658585	2	-0.106363	0.912209	Spain	Eurovac H-40	Hersill Sl	Eurovac	PRK320	Aspirators
2.10488	-0.440785	-0.29063	0.412625	-0.372795	-0.0449093	0.0953522	0.658585	2	-0.106363	-2.18441	Norway	Laerdal Asa-79-00-09	Asmund S Laerdal	Laerdal	PRK320	Aspirators
-0.321102	-0.440785	-0.29063	0.412625	-0.372795	-0.0449093	-0.32884	0.658585	2	-0.106363	0.260661	Spain	Hersill V7 Plus B	Hersill Sl	Hersill	PRK320	Aspirators
-0.321102	-0.440785	-0.29063	0.412625	-0.372795	-0.0449093	-0.306061	0.658585	2	-0.106363	0.260661	Spain	Hersill V7 Plus B	Hersill Sl	Hersill	PRK320	Aspirators
-0.321102	-0.440785	-0.29063	0.412625	-0.372795	-0.0449093	-0.330369	0.658585	2	-0.106363	0.260661	Spain	Hersill V7 Plus B	Hersill Sl	Hersill	PRK320	Aspirators
-0.321102	-0.440785	-0.29063	0.412625	-0.372795	-0.0449093	-0.265678	0.658585	2	-0.106363	0.260661	Spain	Hersill V7 Plus B	Hersill Sl	Hersill	PRK320	Aspirators
2.10488	-0.440785	-0.29063	0.412625	-0.372795	-0.0449093	-0.325544	0.658585	2	-0.106363	-2.18441	Norway	Laerdal N 4001	Laerdal Medical Corp	Laerdal	PRK320	Aspirators
-0.0515487	-0.440785	-0.29063	0.412625	-0.372795	-0.0449093	-0.328527	0.658585	2	-0.106363	0.0314474	Italy	Boscarol Ob2012	Oscar Boscarol Srl	Boscarol	PRK320	Aspirators
2.10488	-0.440785	-0.29063	0.412625	-0.372795	-0.0449093	-0.177517	0.658585	2	-0.106363	-2.18441	Australia	Medelco 5614	Medelco Electronics	Medelco	PRK320	Aspirators
1.02666	-0.440785	2.21895	0.412625	-0.372795	-0.0449093	-0.328601	0.658585	2	-0.106363	-1.0696	UK	Mge Sam 12	Mg Electric Ltd	MGE	PRK320	Aspirators
0.083228	-0.440785	-0.29063	0.412625	-0.372795	-0.0449093	-0.32884	0.658585	2	-0.106363	-0.0277165	Switzerland	Vario 18	Medela AG	Vario	PRK320	Aspirators
0.487558	-0.440785	-0.29063	0.412625	-0.372795	-0.0449093	-0.325111	0.658585	2	-0.106363	-0.490981	Taiwan	Gemmy Su-305p	Gemmy Ind Corp	Gemmy	PRK320	Aspirators
2.10488	-0.440785	-0.29063	0.412625	-0.372795	-0.0449093	-0.329982	0.658585	2	-0.106363	-2.18441	Switzerland	Medela Basic 036	Medela AG	Medela	PRK320	Aspirators
2.10488	-0.440785	-0.29063	0.412625	-0.372795	-0.0449093	-0.329605	0.658585	2	-0.106363	-2.18441	Germany	Aesculap Gf 80/Gf84	B Braun Melsungen AG	Aesculap	PRK320	Aspirators
2.10488	-0.440785	-0.29063	0.412625	-0.372795	-0.0449093	-0.277601	0.658585	2	-0.106363	-2.18441	Switzerland	Medela Basic 036	Medela AG	Medela	PRK320	Aspirators
2.10488	-0.440785	-0.29063	0.412625	-0.372795	-0.0449093	-0.329448	0.658585	2	-0.106363	-2.18441	Switzerland	Medela Basic 036	Medela AG	Medela	PRK320	Aspirators
2.10488	-0.440785	-0.29063	0.412625	-0.372795	-0.0449093	-0.324614	0.658585	2	-0.106363	-2.18441	Switzerland	Medela Basic 036	Medela AG	Medela	PRK320	Aspirators
2.10488	-0.440785	-0.29063	0.412625	-0.372795	-0.0449093	-0.329761	0.658585	2	-0.106363	-2.18441	Switzerland	Medela Basic 036	Medela AG	Medela	PRK320	Aspirators
2.10488	-0.440785	-0.29063	0.412625	-0.372795	-0.0449093	-0.208426	0.658585	2	-0.106363	-2.18441	Switzerland	Medela Basic 036	Medela AG	Medela	PRK320	Aspirators
2.10488	-0.440785	-0.29063	0.412625	-0.372795	-0.0449093	-0.326078	0.658585	2	-0.106363	-2.18441	Switzerland	Medela Basic 036	Medela AG	Medela	PRK320	Aspirators
-0.455879	-0.440785	-0.29063	0.412625	-0.372795	-0.0449093	-0.329908	0.658585	2	-0.106363	0.511085	Italy	Penlon Sp20 Plus	Air Liquide Medical Systems SpA	Penlon	PRK320	Aspirators
-0.455879	-0.440785	-0.29063	0.412625	-0.372795	-0.0449093	-0.328297	0.658585	2	-0.106363	0.511085	Italy	Penlon Sp20 Plus	Air Liquide Medical Systems SpA	Penlon	PRK320	Aspirators
-0.455879	-0.440785	-0.29063	0.412625	-0.372795	-0.0449093	-0.329448	0.658585	2	-0.106363	0.511085	Italy	Penlon Sp20 Plus	Air Liquide Medical Systems SpA	Penlon	PRK320	Aspirators
0.757111	-0.440785	-0.29063	0.412625	-0.372795	-0.0449093	-0.327818	0.658585	2	-0.106363	-0.703078	UK	Eschmann VP 35	Eschmann Bros & Walsh Ltd	Eschmann	PRK320	Aspirators
0.757111	-0.440785	-0.29063	0.412625	-0.372795	-0.0449093	-0.327349	0.658585	2	-0.106363	-0.703078	UK	Eschmann VP 35	Eschmann Bros & Walsh Ltd	Eschmann	PRK320	Aspirators
2.10488	-0.440785	2.21895	0.412625	-0.372795	-0.0449093	-0.217118	0.658585	2	-0.106363	-2.18441	Switzerland	Medela Basic 036	Medela AG	Medela	PRK320	Aspirators
2.10488	-0.440785	-0.29063	0.412625	-0.372795	-0.0449093	-0.328297	0.658585	2	-0.106363	-2.18441	Switzerland	Medela Basic 036	Medela AG	Medela	PRK320	Aspirators
0.622335	-0.440785	2.21895	0.412625	-0.372795	-0.0449093	-0.32884	0.658585	2	-0.106363	-0.610798	Italy	Ca-Mi Ceo470	Ca-Mi Snc	Ca-Mi	PRK320	Aspirators
1.02666	-0.440785	2.21895	0.412625	-0.372795	-0.0449093	-0.325912	0.658585	2	-0.106363	-0.990712	USA	Hms-2003sb	HMS	HMS	PRK320	Aspirators
-0.321102	-0.440785	-0.29063	0.412625	-0.372795	-0.0449093	1.04843	0.658585	2	-0.106363	0.266615	UK	DeSoutter CCS	Desoutter Medical	Desoutter	PRK320	Aspirators
2.10488	-0.440785	-0.29063	0.412625	-0.372795	-0.0449093	-0.171468	0.658585	2	-0.106363	-2.18441	Switzerland	Medela Basic 036	Medela AG	Medela	PRK320	Aspirators
2.10488	-0.440785	-0.29063	0.412625	-0.372795	-0.0449093	-0.32919	0.658585	2	-0.106363	-2.18441	Switzerland	Medela Basic 036	Medela AG	Medela	PRK320	Aspirators
0.757111	-0.440785	-0.29063	0.412625	-0.372795	-0.0449093	-0.309818	0.658585	2	-0.106363	-0.703078	UK	Eschmann VP 35	Eschmann Bros & Walsh Ltd	Eschmann	PRK320	Aspirators
2.10488	-0.440785	2.21895	0.412625	-0.372795	-0.0449093	-0.329144	0.658585	2	-0.106363	-2.18441	Germany	Aesculap Gf 80/Gf84	B Braun Melsungen AG	Aesculap	PRK320	Aspirators
2.10488	-0.440785	-0.29063	0.412625	-0.372795	-0.0449093	-0.324448	0.658585	2	-0.106363	-2.18441	Switzerland	Medela Basic 036	Medela AG	Medela	PRK320	Aspirators
2.10488	-0.440785	2.21895	0.412625	-0.372795	-0.0449093	-0.328988	0.658585	2	-0.106363	-2.18441	Switzerland	Medela Basic 036	Medela AG	Medela	PRK320	Aspirators
1.9701	-0.440785	-0.29063	0.412625	-0.372795	-0.0449093	-0.329126	0.658585	2	-0.106363	-2.0512	UK	Eschmann VP 25	Eschmann Bros & Walsh Ltd	Eschmann	PRK311	Aspirators
1.9701	-0.440785	-0.29063	0.412625	-0.372795	-0.0449093	-0.329908	0.658585	2	-0.106363	-2.0512	UK	Eschmann VP 25	Eschmann Bros & Walsh Ltd	Eschmann	PRK311	Aspirators
0.487558	-0.440785	-0.29063	0.412625	-0.372795	-0.0449093	-0.329448	0.658585	2	-0.106363	-0.449678	Germany	Ass Kea Dc30	Ass Kea	Ass Kea	PRK311	Aspirators
2.10488	-0.440785	-0.29063	0.412625	-0.372795	-0.0449093	-0.324458	0.658585	2	-0.106363	-2.16878	Switzerland	Egnell Compact 45 Ii	Ameda Zug	Egnell	PRK311	Aspirators
0.757111	-0.440785	2.21895	0.412625	-0.372795	-0.0449093	-0.328527	0.658585	2	-0.106363	-0.727637	USA	Medi-Pump 1132	Thomas Industries Inc	Medi-Pump	PRK311	Aspirators
-0.725432	-0.440785	-0.29063	0.412625	-0.372795	-0.0449093	-0.330369	0.658585	2	-0.106363	0.77788	USA	Ambujet P1000B	DeVilbiss Health Care LLC	Spencer	PRK311	Aspirators
-0.725432	-0.440785	-0.29063	0.412625	-0.372795	-0.0449093	-0.330369	0.658585	2	-0.106363	0.77788	USA	Ambujet P1000B	DeVilbiss Health Care LLC	Spencer	PRK311	Aspirators
-0.994985	-0.440785	-0.29063	0.412625	-0.372795	-0.0449093	-0.327284	0.658585	2	-0.106363	1.05323	Italy	Boscarol Bsu158	Boscarol Srl	Boscarol	PRK311	Aspirators
-0.994985	-0.440785	-0.29063	0.412625	-0.372795	-0.0449093	-0.330369	0.658585	2	-0.106363	0.933046	USA	Ambujet P1000B	DeVilbiss Health Care LLC	Spencer	PRK340	Aspirators
-0.994985	-0.440785	-0.29063	0.412625	-0.372795	-0.0449093	-0.330139	0.658585	2	-0.106363	0.933046	USA	Ambujet P1000B	DeVilbiss Health Care LLC	Spencer	PRK340	Aspirators
-0.455879	-0.440785	-0.29063	0.412625	-0.372795	-0.0449093	-0.330369	0.658585	2	-0.106363	0.511829	Spain	V7 Plus B	Hersill S.L.	Hersill	PRK340	Aspirators
-0.455879	-0.440785	-0.29063	0.412625	-0.372795	-0.0449093	-0.330369	0.658585	2	-0.106363	0.509224	Spain	V7 Plus B	Hersill S.L.	Hersill	PRK340	Aspirators
-0.455879	-0.440785	-0.29063	0.412625	-0.372795	-0.0449093	-0.330369	0.658585	2	-0.106363	0.509224	Spain	Hersill V7 Plus Ac	Hersill Sl	Hersill	PRK340	Aspirators
-1.12976	-0.440785	-0.29063	0.412625	-0.372795	-0.0449093	-0.330369	0.658585	2	-0.106363	1.07147	USA	Spencer SC75560D-Ambu Jet P 1000B 10G	DeVilbiss Health Care LLC	Spencer	PRK340	Aspirators
-1.12976	-0.440785	-0.29063	0.412625	-0.372795	-0.0449093	-0.330369	0.658585	2	-0.106363	1.07147	USA	Spencer SC75560D-Ambu Jet P 1000B 10G	DeVilbiss Health Care LLC	Spencer	PRK340	Aspirators
-1.12976	-0.440785	-0.29063	0.412625	-0.372795	-0.0449093	-0.330369	0.658585	2	-0.106363	1.07147	USA	Spencer SC75560D-Ambu Jet P 1000B 10G	DeVilbiss Health Care LLC	Spencer	PRK340	Aspirators
-0.860208	-0.440785	-0.29063	0.412625	-0.372795	-0.0449093	-0.330369	0.658585	2	-0.106363	0.816579	China	Lifeline 5502	Lifeline	Lifeline	PRK340	Aspirators
-1.12976	-0.440785	-0.29063	0.412625	-0.372795	-0.0449093	-0.330369	0.658585	2	-0.106363	1.195	Italy	New Askir 30	Ca-Mi Snc	New Askir	PRK340	Aspirators
-0.0515487	-0.440785	-0.29063	0.412625	-0.372795	-0.0449093	-0.296375	0.658585	2	-0.106363	0.0973091	China	Electric Yx930d	Electric Suction Apparatus	Electric	PRK340	Aspirators
1.56577	-0.440785	-0.29063	0.412625	-0.372795	-0.0449093	-0.291394	0.658585	2	-0.106363	-1.5883	Switzerland	Medela Basic 036	Medela AG	Medela	PRK340	Aspirators
-0.455879	-0.440785	-0.29063	0.412625	-0.372795	-0.0449093	-0.330369	0.658585	2	-0.106363	0.516666	Spain	Hersill V7 Plus Ac	Hersill Sl	Hersill	PRK340	Aspirators
-0.321102	-0.440785	-0.29063	0.412625	-0.372795	-0.0449093	0.0343166	0.658585	2	-0.106363	0.326523	Australia	Clements Suc 84109	Clements Pty Ltd	Clements	PRK340	Aspirators
1.02666	-0.440785	-0.29063	0.412625	-0.372795	-0.0449093	-0.328113	0.658585	2	-0.106363	-1.09639	UK	Eschmann VP 35	Eschmann Bros & Walsh Ltd	Eschmann	PRK340	Aspirators
-0.0515487	-0.440785	-0.29063	0.412625	-0.372795	-0.0449093	1.76131	0.658585	2	-0.106363	-0.00501842	UK	Oxylitre Ess100	Oxylitre Ltd	Oxylitre	PRK340	Aspirators
-0.0515487	-0.440785	-0.29063	0.412625	-0.372795	-0.0449093	-0.289866	0.658585	2	-0.106363	-0.00501842	UK	Oxylitre Ess100	Oxylitre Ltd	Oxylitre	PRK340	Aspirators
-0.0515487	-0.440785	-0.29063	0.412625	-0.372795	-0.0449093	-0.320314	0.658585	2	-0.106363	-0.00501842	UK	Oxylitre Ess100	Oxylitre Ltd	Oxylitre	PRK340	Aspirators
-0.0515487	-0.440785	-0.29063	0.412625	-0.372795	-0.0449093	-0.326069	0.658585	2	-0.106363	-0.00725102	Italy	New Hospivac 400	Ca-Mi Snc	Hospivac	PRK340	Aspirators
1.83532	-0.440785	2.21895	0.412625	-0.372795	-0.0449093	-0.329245	0.658585	2	-0.106363	-1.90682	USA	Medi-Pump 1132	Thomas Industries Inc	Medi-Pump	PRK340	Aspirators
-0.590655	-0.440785	-0.29063	0.412625	-0.372795	-0.0449093	-0.32339	0.658585	2	-0.106363	0.591086	Italy	New Hospivac 400	Ca-Mi Snc	Hospivac	PRK340	Aspirators
-0.590655	-0.440785	-0.29063	0.412625	-0.372795	-0.0449093	-0.330369	0.658585	2	-0.106363	0.591086	Italy	New Askir 230-12 BR	Ca-Mi Snc	New Askir	PRK340	Aspirators
-0.455879	-0.440785	-0.29063	0.412625	-0.372795	-0.0449093	-0.329908	0.658585	2	-0.106363	0.416943	Italy	Boscarol Bsu158	Oscar Boscarol Srl	Boscarol	PRK340	Aspirators
1.83532	-0.440785	-0.29063	0.412625	-0.372795	-0.0449093	-0.327607	0.658585	2	-0.106363	-1.90682	USA	Medi-Pump 1132	Thomas Industries Inc	Medi-Pump	PRK340	Aspirators
-0.0515487	-0.440785	-0.29063	0.412625	-0.372795	-0.0449093	-0.328988	0.658585	2	-0.106363	0.0273543	Italy	Boscarol Xas0220	Oscar Boscarol Srl	Boscarol	PRK340	Aspirators
0.218005	-0.440785	-0.29063	0.412625	-0.372795	-0.0449093	-0.328988	0.658585	2	-0.106363	-0.281117	Italy	Markos Mefar Sp30	Markos Mefar SpA	Markos Mefar	PRK340	Aspirators
-0.455879	-0.440785	-0.29063	0.412625	-0.372795	-0.0449093	6.299	0.658585	2	-0.106363	0.516666	Malaysia	Respicare R6842-Mc-600c	Respicare Corporation Sdn Bhd	Respicare	PRK340	Aspirators
-0.455879	-0.440785	-0.29063	0.412625	-0.372795	-0.0449093	8.22327	0.658585	2	-0.106363	0.517038	Taiwan	Respicare Ydx-100m-35a	Respicare Corporation Sdn Bhd	Respicare	PRK340	Aspirators
-0.455879	-0.440785	-0.29063	0.412625	-0.372795	-0.0449093	1.44336	0.658585	2	-0.106363	0.517038	Taiwan	Respicare Ydx-100m-35a	Respicare Corporation Sdn Bhd	Respicare	PRK340	Aspirators
0.891888	-0.440785	-0.29063	0.412625	-0.372795	-0.0449093	10.5184	0.658585	2	-0.106363	-0.856012	Switzerland	Vario 026	Medela AG	Vario	PRK340	Aspirators
0.891888	-0.440785	-0.29063	0.412625	-0.372795	-0.0449093	-0.161257	0.658585	2	-0.106363	-0.856012	Switzerland	Vario 026	Medela AG	Vario	PRK340	Aspirators
-0.455879	-0.440785	-0.29063	0.412625	-0.372795	-0.0449093	2.06209	0.658585	2	-0.106363	0.401315	UK	Mge Sam 14	Mg Electric Ltd	MGE	PRK340	Aspirators
0.083228	-0.440785	-0.29063	0.412625	-0.372795	-0.0449093	2.67315	0.658585	2	-0.106363	-0.0228792	Czech Republic	Victoria II	Cheiron A/S	Victoria	PRK340	Aspirators
0.083228	-0.440785	-0.29063	0.412625	-0.372795	-0.0449093	-0.316788	0.658585	2	-0.106363	-0.0228792	Czech Republic	Victoria II	Cheiron A/S	Victoria	PRK340	Aspirators
-0.455879	-0.440785	-0.29063	0.412625	-0.372795	-0.0449093	5.41971	0.658585	2	-0.106363	0.516666	Spain	Hersill V7 Plus Ac	Hersill Sl	Hersill	PRK340	Aspirators
-0.455879	-0.440785	-0.29063	0.412625	-0.372795	-0.0449093	0.291589	0.658585	2	-0.106363	0.516666	Spain	Hersill V7 Plus Ac	Hersill Sl	Hersill	PRK340	Aspirators
-0.455879	-0.440785	-0.29063	0.412625	-0.372795	-0.0449093	-0.330369	0.658585	2	-0.106363	0.516666	Spain	Hersill V7 Plus Ac	Hersill Sl	Hersill	PRK340	Aspirators
-0.455879	-0.440785	-0.29063	0.412625	-0.372795	-0.0449093	-0.260927	0.658585	2	-0.106363	0.516666	Spain	Hersill V7 Plus Ac	Hersill Sl	Hersill	PRK340	Aspirators
-0.455879	-0.440785	-0.29063	0.412625	-0.372795	-0.0449093	2.23757	0.658585	2	-0.106363	0.516666	Spain	Hersill V7 Plus Ac	Hersill Sl	Hersill	PRK340	Aspirators
-0.455879	-0.440785	-0.29063	0.412625	-0.372795	-0.0449093	1.80252	0.658585	2	-0.106363	0.516666	Spain	Hersill V7 Plus Ac	Hersill Sl	Hersill	PRK340	Aspirators
-0.590655	-0.440785	-0.29063	0.412625	-0.372795	-0.0449093	-0.330369	0.658585	2	-0.106363	0.592575	China	Electric Yx930d	Electric Suction Apparatus	Electric	PRK340	Aspirators
-0.455879	-0.440785	-0.29063	0.412625	-0.372795	-0.0449093	-0.330369	0.658585	2	-0.106363	0.523736	China	Yuwell 7e-A	Jiangshu Yuyue Medical Equipment & Supply Co Ltd	Yuwell	PRK340	Aspirators
0.083228	-0.440785	-0.29063	0.412625	-0.372795	-0.0449093	-0.328601	0.658585	2	-0.106363	-0.0228792	Czech Republic	Victoria II	Cheiron A/S	Victoria	PRK340	Aspirators
0.083228	-0.440785	-0.29063	0.412625	-0.372795	-0.0449093	-0.162721	0.658585	2	-0.106363	-0.0228792	Czech Republic	Victoria II	Cheiron A/S	Victoria	PRK340	Aspirators
0.083228	-0.440785	-0.29063	0.412625	-0.372795	-0.0449093	-0.304432	0.658585	2	-0.106363	-0.0228792	Czech Republic	Victoria II	Cheiron A/S	Victoria	PRK340	Aspirators
-0.455879	-0.440785	-0.29063	0.412625	-0.372795	-0.0449093	1.65083	0.658585	2	-0.106363	0.516666	Spain	Hersill V7 Plus Ac	Hersill Sl	Hersill	PRK340	Aspirators
-0.455879	-0.440785	-0.29063	0.412625	-0.372795	-0.0449093	1.65965	0.658585	2	-0.106363	0.516666	Spain	Hersill V7 Plus Ac	Hersill Sl	Hersill	PRK340	Aspirators
-0.455879	-0.440785	-0.29063	0.412625	-0.372795	-0.0449093	-0.330369	0.658585	2	-0.106363	0.516666	Spain	Hersill V7 Plus Ac	Hersill Sl	Hersill	PRK340	Aspirators
-0.455879	-0.440785	-0.29063	0.412625	-0.372795	-0.0449093	2.37238	0.658585	2	-0.106363	0.516666	Spain	Hersill V7 Plus Ac	Hersill Sl	Hersill	PRK340	Aspirators
-0.455879	-0.440785	-0.29063	0.412625	-0.372795	-0.0449093	5.04144	0.658585	2	-0.106363	0.516666	Spain	Hersill V7 Plus Ac	Hersill Sl	Hersill	PRK340	Aspirators
1.56577	-0.440785	-0.29063	0.412625	-0.372795	-0.0449093	-0.324918	0.658585	2	-0.106363	-1.64263	Switzerland	Medela 036.1201	Medela AG	Medela	PRK340	Aspirators
1.56577	-0.440785	-0.29063	0.412625	-0.372795	-0.0449093	-0.327929	0.658585	2	-0.106363	-1.64263	Switzerland	Medela 036.1201	Medela AG	Medela	PRK340	Aspirators
1.56577	-0.440785	-0.29063	0.412625	-0.372795	-0.0449093	-0.203611	0.658585	2	-0.106363	-1.64263	Switzerland	Medela 036.1201	Medela AG	Medela	PRK340	Aspirators
0.891888	-0.440785	-0.29063	0.412625	-0.372795	-0.0449093	-0.156607	0.658585	2	-0.106363	-0.856012	Switzerland	Vario 026	Medela AG	Vario	PRK340	Aspirators
0.891888	-0.440785	-0.29063	0.412625	-0.372795	-0.0449093	-0.328527	0.658585	2	-0.106363	-0.856012	Switzerland	Vario 026	Medela AG	Vario	PRK340	Aspirators
-0.860208	-0.440785	-0.29063	0.412625	-0.372795	-0.0449093	-0.330369	0.658585	2	-0.106363	0.916674	Taiwan	Respicare Ydx-100m-35a	Respicare Corporation Sdn Bhd	Respicare	PRK340	Aspirators
-0.860208	-0.440785	-0.29063	0.412625	-0.372795	-0.0449093	-0.330369	0.658585	2	-0.106363	0.916674	Taiwan	Respicare Ydx-100m-35a	Respicare Corporation Sdn Bhd	Respicare	PRK340	Aspirators
-0.455879	-0.440785	-0.29063	0.412625	-0.372795	-0.0449093	-0.330369	0.658585	2	-0.106363	0.509224	Spain	Hersill V7 Plus Ac	Hersill Sl	Hersill	PRK340	Aspirators
-0.455879	-0.440785	-0.29063	0.412625	-0.372795	-0.0449093	-0.330369	0.658585	2	-0.106363	0.511829	Spain	Hersill V7 Plus Ac	Hersill Sl	Hersill	PRK340	Aspirators
1.70055	-0.440785	-0.29063	0.412625	-0.372795	-0.0449093	-0.322773	0.658585	2	-0.106363	-1.68133	UK	Aerosol Sam 14	Aerosol Products Ltd	Aerosol	PRK340	Aspirators
-0.455879	-0.440785	-0.29063	0.412625	-0.372795	-0.0449093	-0.330369	0.658585	2	-0.106363	0.509224	Spain	Hersill V7 Plus Ac	Hersill Sl	Hersill	PRK340	Aspirators
-0.455879	-0.440785	-0.29063	0.412625	-0.372795	-0.0449093	-0.330369	0.658585	2	-0.106363	0.511829	Spain	Hersill V7 Plus Ac	Hersill Sl	Hersill	PRK340	Aspirators
-0.455879	-0.440785	-0.29063	0.412625	-0.372795	-0.0449093	-0.330369	0.658585	2	-0.106363	0.509224	Spain	Hersill V7 Plus Ac	Hersill Sl	Hersill	PRK340	Aspirators
-0.455879	-0.440785	-0.29063	0.412625	-0.372795	-0.0449093	-0.330369	0.658585	2	-0.106363	0.509224	Spain	Hersill V7 Plus Ac	Hersill Sl	Hersill	PRK340	Aspirators
-0.455879	-0.440785	-0.29063	0.412625	-0.372795	-0.0449093	-0.330369	0.658585	2	-0.106363	0.509224	Spain	Hersill V7 Plus Ac	Hersill Sl	Hersill	PRK340	Aspirators
0.352781	-0.440785	-0.29063	0.412625	-0.372795	-0.0449093	-0.28633	0.658585	2	-0.106363	-0.419538	Czech Republic	Victoria Portable	Cheiron A/S	Victoria	PRK340	Aspirators
1.9701	-0.440785	-0.29063	0.412625	-0.372795	-0.0449093	-0.31955	0.658585	2	-0.106363	-2.03892	UK	Eschmann VP 35	Eschmann Bros & Walsh Ltd	Eschmann	PRK340	Aspirators
-0.455879	-0.440785	-0.29063	0.412625	-0.372795	-0.0449093	-0.325839	0.658585	2	-0.106363	0.511829	Spain	Hersill V7 Plus Ac	Hersill Sl	Hersill	PRK340	Aspirators
0.891888	-0.440785	-0.29063	0.412625	-0.372795	-0.0449093	-0.327607	0.658585	2	-0.106363	-0.856012	Switzerland	Vario 026	Medela AG	Vario	PRK340	Aspirators
0.891888	-0.440785	-0.29063	0.412625	-0.372795	-0.0449093	-0.329908	0.658585	2	-0.106363	-0.856012	Switzerland	Vario 026	Medela AG	Vario	PRK340	Aspirators
1.29622	-0.440785	-0.29063	0.412625	-0.372795	-0.0449093	-0.325765	0.658585	2	-0.106363	-1.36691	Switzerland	Master 45	Ameda AG	Ameda-Egnell	PRK340	Aspirators
0.487558	-0.440785	-0.29063	0.412625	-0.372795	-0.0449093	-0.324688	0.658585	2	-0.106363	-0.556099	Australia	Clements Hivac 84109	Clements Pty Ltd	Clements	PRK340	Aspirators
0.891888	-0.440785	-0.29063	0.412625	-0.372795	-0.0449093	3.62903	0.658585	2	-0.106363	-0.856012	Switzerland	Vario 026	Medela AG	Vario	PRK340	Aspirators
-0.455879	-0.440785	-0.29063	0.412625	-0.372795	-0.0449093	-0.330369	0.658585	2	-0.106363	0.50848	Czech Republic	Victoria II	Cheiron A/S	Victoria	PRK340	Aspirators
-0.455879	-0.440785	-0.29063	0.412625	-0.372795	-0.0449093	-0.330369	0.658585	2	-0.106363	0.50848	Czech Republic	Victoria II	Cheiron A/S	Victoria	PRK340	Aspirators
-0.455879	-0.440785	-0.29063	0.412625	-0.372795	-0.0449093	-0.330369	0.658585	2	-0.106363	0.50848	Czech Republic	Victoria II	Cheiron A/S	Victoria	PRK340	Aspirators
-0.455879	-0.440785	-0.29063	0.412625	-0.372795	-0.0449093	-0.330369	0.658585	2	-0.106363	0.50848	Czech Republic	Victoria II	Cheiron A/S	Victoria	PRK340	Aspirators
1.29622	-0.440785	-0.29063	0.412625	-0.372795	-0.0449093	-0.317874	0.658585	2	-0.106363	-1.36691	Switzerland	Master 45	Ameda AG	Ameda-Egnell	PRK340	Aspirators
1.43099	-0.440785	-0.29063	0.412625	-0.372795	-0.0449093	-0.316309	0.658585	2	-0.106363	-1.50979	Switzerland	Medela 056.1411	Medela AG	Medela	PRK340	Aspirators
0.757111	-0.440785	-0.29063	0.412625	-0.372795	-0.0449093	-0.155438	0.658585	2	-0.106363	-0.754428	Czech Republic	Victoria Portable	Cheiron A/S	Victoria	PRK340	Aspirators
1.56577	-0.440785	-0.29063	0.412625	-0.372795	-0.0449093	-0.322266	0.658585	2	-0.106363	-1.51426	Switzerland	Medela Basic 036	Medela AG	Medela	PRK340	Aspirators
1.43099	-0.440785	-0.29063	0.412625	-0.372795	-0.0449093	-0.321852	0.658585	2	-0.106363	-1.49975	Switzerland	Medela Basic 036	Medela AG	Medela	PRK340	Aspirators
-0.0515487	-0.440785	-0.29063	0.412625	-0.372795	-0.0449093	-0.15228	0.658585	2	-0.106363	-0.00650682	Czech Republic	Victoria II	Cheiron A/S	Victoria	PRK340	Aspirators
-0.0515487	-0.440785	-0.29063	0.412625	-0.372795	-0.0449093	-0.278789	0.658585	2	-0.106363	-0.00650682	Czech Republic	Victoria II	Cheiron A/S	Victoria	PRK340	Aspirators
-0.0515487	-0.440785	-0.29063	0.412625	-0.372795	-0.0449093	-0.329448	0.658585	2	-0.106363	-0.00650682	Czech Republic	Victoria II	Cheiron A/S	Victoria	PRK340	Aspirators
-0.0515487	-0.440785	-0.29063	0.412625	-0.372795	-0.0449093	-0.328067	0.658585	2	-0.106363	-0.00464632	Czech Republic	Victoria II	Cheiron A/S	Victoria	PRK340	Aspirators
-0.0515487	-0.440785	-0.29063	0.412625	-0.372795	-0.0449093	-0.329908	0.658585	2	-0.106363	-0.00464632	Czech Republic	Victoria II	Cheiron A/S	Victoria	PRK340	Aspirators
1.29622	-0.440785	-0.29063	0.412625	-0.372795	-0.0449093	-0.0796522	0.658585	2	-0.106363	-1.36691	Switzerland	Master 45	Ameda AG	Ameda-Egnell	PRK340	Aspirators
1.29622	-0.440785	-0.29063	0.412625	-0.372795	-0.0449093	-0.226648	0.658585	2	-0.106363	-1.36691	Switzerland	Master 45	Ameda AG	Ameda-Egnell	PRK340	Aspirators
0.757111	-0.440785	-0.29063	0.412625	-0.372795	-0.0449093	-0.241674	0.658585	2	-0.106363	-0.704195	Czech Republic	Victoria Portable	Cheiron A/S	Victoria	PRK340	Aspirators
0.757111	-0.440785	-0.29063	0.412625	-0.372795	-0.0449093	-0.308197	0.658585	2	-0.106363	-0.704195	Czech Republic	Victoria Portable	Cheiron A/S	Victoria	PRK340	Aspirators
1.83532	-0.440785	-0.29063	0.412625	-0.372795	-0.0449093	-0.322469	0.658585	2	-0.106363	-1.8004	Switzerland	Medela Basic 036	Medela AG	Medela	PRK340	Aspirators
0.083228	-0.440785	-0.29063	0.412625	-0.372795	-0.0449093	-0.330369	0.658585	2	-0.106363	-0.0195303	Italy	New Askir 230-12 BR	Ca-Mi Snc	New Askir	PRK340	Aspirators
-0.590655	-0.440785	-0.29063	0.412625	-0.372795	-0.0449093	-0.330369	0.658585	2	-0.106363	0.526713	Czech Republic	Victoria Versa	Cheiron A/S	Victoria	PRK340	Aspirators
0.757111	-0.440785	-0.29063	0.412625	-0.372795	-0.0449093	-0.32838	0.658585	2	-0.106363	-0.708288	Norway	Laerdal Suction Unit	Laerdal Medical AS	LSU	PRK340	Aspirators
-0.590655	-0.440785	-0.29063	0.412625	-0.372795	-0.0449093	-0.330369	0.658585	2	-0.106363	0.59183	Malaysia	Respicare R6842-Mc-600c	Respicare Corporation Sdn Bhd	Respicare	PRK340	Aspirators
1.43099	-0.440785	-0.29063	0.412625	-0.372795	-0.0449093	0.00531339	0.658585	2	-0.106363	-1.51016	Switzerland	Medela Basic 036	Medela AG	Medela	PRK340	Aspirators
2.50921	-0.440785	-0.29063	0.412625	-0.372795	-0.0449093	-0.329291	0.658585	2	-0.106363	-2.49511	USA	Medi-Pump 1132	Thomas Industries Inc	Medi-Pump	PRK340	Aspirators
1.83532	-0.440785	-0.29063	0.412625	-0.372795	-0.0449093	-0.330369	0.658585	2	-0.106363	-1.90608	Switzerland	Vario 026	Medela AG	Vario	PRK340	Aspirators
1.70055	-0.440785	-0.29063	0.412625	-0.372795	-0.0449093	-0.330369	0.658585	2	-0.106363	-1.74161	USA	Medi-Pump 1132	Thomas Industries Inc	Medi-Pump	PRK340	Aspirators
1.83532	-0.440785	-0.29063	0.412625	-0.372795	-0.0449093	-0.327607	0.658585	2	-0.106363	-1.86143	USA	Medi-Pump 1132	Thomas Industries Inc	Medi-Pump	PRK340	Aspirators
1.43099	-0.440785	-0.29063	0.412625	-0.372795	-0.0449093	-0.327607	0.658585	2	-0.106363	-1.46737	USA	Medi-Pump 1132	Thomas Industries Inc	Medi-Pump	PRK340	Aspirators
0.891888	-0.440785	-0.29063	0.412625	-0.372795	-0.0449093	-0.256249	0.658585	2	-0.106363	-0.856012	Switzerland	Vario 026	Medela AG	Vario	PRK340	Aspirators
0.757111	-0.440785	-0.29063	0.412625	-0.372795	-0.0449093	-0.317018	0.658585	2	-0.106363	-0.754428	Czech Republic	Victoria Portable	Cheiron A/S	Victoria	PRK340	Aspirators
0.891888	-0.440785	-0.29063	0.412625	-0.372795	-0.0449093	-0.326916	0.658585	2	-0.106363	-0.856012	Switzerland	Vario 026	Medela AG	Vario	PRK340	Aspirators
0.083228	-0.440785	-0.29063	0.412625	-0.372795	-0.0449093	-0.155659	0.658585	2	-0.106363	-0.101392	Czech Republic	Victoria Versa	Cheiron A/S	Victoria	PRK340	Aspirators
0.083228	-0.440785	-0.29063	0.412625	-0.372795	-0.0449093	-0.0950377	0.658585	2	-0.106363	-0.101392	Czech Republic	Victoria Versa	Cheiron A/S	Victoria	PRK340	Aspirators
0.083228	-0.440785	-0.29063	0.412625	-0.372795	-0.0449093	-0.325765	0.658585	2	-0.106363	-0.101392	Czech Republic	Victoria Versa	Cheiron A/S	Victoria	PRK340	Aspirators
0.083228	-0.440785	-0.29063	0.412625	-0.372795	-0.0449093	-0.324384	0.658585	2	-0.106363	-0.101392	Czech Republic	Victoria Versa	Cheiron A/S	Victoria	PRK340	Aspirators
-0.455879	-0.440785	-0.29063	0.412625	-0.372795	-0.0449093	-0.330369	0.658585	2	-0.106363	0.516666	Spain	Hersill V7 Plus Ac	Hersill Sl	Hersill	PRK340	Aspirators
-0.455879	-0.440785	-0.29063	0.412625	-0.372795	-0.0449093	-0.330369	0.658585	2	-0.106363	0.516666	Spain	Hersill V7 Plus Ac	Hersill Sl	Hersill	PRK340	Aspirators
0.891888	-0.440785	-0.29063	0.412625	-0.372795	-0.0449093	-0.0229256	0.658585	2	-0.106363	-0.856012	Switzerland	Vario 026	Medela AG	Vario	PRK340	Aspirators
0.891888	-0.440785	-0.29063	0.412625	-0.372795	-0.0449093	-0.330369	0.658585	2	-0.106363	-0.856012	Switzerland	Vario 026	Medela AG	Vario	PRK340	Aspirators
1.70055	-0.440785	-0.29063	0.412625	-0.372795	-0.0449093	-0.330369	0.658585	2	-0.106363	-1.69212	Switzerland	Medela Basic 036	Medela AG	Medela	PRK340	Aspirators
1.70055	-0.440785	-0.29063	0.412625	-0.372795	-0.0449093	0.816869	0.658585	2	-0.106363	-1.76282	UK	Gabler FSE 500	Gabler Medical Ltd	Gabler	PRK340	Aspirators
0.891888	-0.440785	-0.29063	0.412625	-0.372795	-0.0449093	0.704539	0.658585	2	-0.106363	-0.856012	Switzerland	Vario 026	Medela AG	Vario	PRK340	Aspirators
-0.455879	-0.440785	-0.29063	0.412625	-0.372795	-0.0449093	-0.330369	0.658585	2	-0.106363	0.516666	Malaysia	Respicare R6842-Mc-600c	Respicare Corporation Sdn Bhd	Respicare	PRK340	Aspirators
-0.455879	-0.440785	-0.29063	0.412625	-0.372795	-0.0449093	-0.330369	0.658585	2	-0.106363	0.517038	Taiwan	Respicare Ydx-100m-35a	Respicare Corporation Sdn Bhd	Respicare	PRK340	Aspirators
-0.455879	-0.440785	-0.29063	0.412625	-0.372795	-0.0449093	-0.330369	0.658585	2	-0.106363	0.516666	Malaysia	Respicare R6842-Mc-600c	Respicare Corporation Sdn Bhd	Respicare	PRK340	Aspirators
-0.455879	-0.440785	-0.29063	0.412625	-0.372795	-0.0449093	-0.330369	0.658585	2	-0.106363	0.517038	Taiwan	Respicare Ydx-100m-35a	Respicare Corporation Sdn Bhd	Respicare	PRK340	Aspirators
1.43099	-0.440785	4.72854	0.412625	-0.372795	-0.0449093	-0.309109	0.658585	2	-0.106363	-1.51016	Switzerland	Medela Basic 036	Medela AG	Medela	PRK340	Aspirators
2.23965	-0.440785	-0.29063	0.412625	-0.372795	-0.0449093	-0.323003	0.658585	2	-0.106363	-2.29976	Australia	Clements Series 15	Clements Pty Ltd	Clements	PRK340	Aspirators
-0.455879	-0.440785	-0.29063	0.412625	-0.372795	-0.0449093	-0.330369	0.658585	2	-0.106363	0.517038	Germany	Unimat 30	Karl Storz GmbH & Co KG	Karl Storz	PRK340	Aspirators
-1.26454	-0.440785	-0.29063	0.412625	-0.372795	-0.0449093	-0.330369	0.658585	2	-0.106363	1.27129	Italy	Hospivac 400	Ca-Mi Srl	Hospivac	PRK340	Aspirators
-1.26454	-0.440785	-0.29063	0.412625	-0.372795	-0.0449093	-0.150135	0.658585	2	-0.106363	1.27129	Italy	Hospivac 400	Ca-Mi Srl	Hospivac	PRK340	Aspirators
-1.26454	-0.440785	-0.29063	0.412625	-0.372795	-0.0449093	-0.330369	0.658585	2	-0.106363	1.27129	Italy	Hospivac 400	Ca-Mi Srl	Hospivac	PRK340	Aspirators
-1.26454	-0.440785	-0.29063	0.412625	-0.372795	-0.0449093	-0.330369	0.658585	2	-0.106363	1.30738	UK	Olympus Ssu-2	Keymed (Medical & Industrial Equipment) Ltd	Olympus	PRK340	Aspirators
-0.994985	-0.440785	-0.29063	0.412625	-0.372795	-0.0449093	-0.329678	0.658585	2	-0.106363	0.933046	Italy	Spencer SC75560D-Ambu Jet P 1000B 10G	Spencer Italia Srl	Spencer	PRK350	Aspirators
-0.994985	-0.440785	-0.29063	0.412625	-0.372795	-0.0449093	-0.330369	0.658585	2	-0.106363	0.933046	Italy	Spencer SC75560D-Ambu Jet P 1000B 10G	Spencer Italia Srl	Spencer	PRK350	Aspirators
1.70055	-0.440785	-0.29063	0.412625	-0.372795	-0.0449093	-0.326686	0.658585	2	-0.106363	-1.70403	USA	Schuco 9711-133	Allied Healthcare Product Inc	Schuco	PRK350	Aspirators
0.218005	-0.440785	-0.29063	0.412625	-0.372795	-0.0449093	-0.260328	0.658585	2	-0.106363	-0.169487	USA	Advantage L190-Gr	Allied Healthcare Products Inc	Advantage	PRK350	Aspirators
-0.860208	-0.440785	-0.29063	0.412625	-0.372795	-0.0449093	-0.330369	0.658585	2	-0.106363	0.854905	Italy	New Askir 230/12V BR	Ca-Mi Snc	Ca-Mi	PRK350	Aspirators
1.02666	-0.440785	-0.29063	0.412625	-0.372795	-0.0449093	-0.330369	0.658585	2	-0.106363	-0.982154	USA	Medi-Pump 1132	Thomas Industries Inc	Medi-Pump	PRK350	Aspirators
-0.0515487	-0.440785	-0.29063	0.412625	-0.372795	-0.0449093	-0.329908	0.658585	2	-0.106363	0.0318195	Italy	Boscarol Ob2012	Oscar Boscarol Srl	Boscarol	PRK350	Aspirators
-0.321102	-0.440785	-0.29063	0.412625	-0.372795	-0.0449093	-0.222716	0.658585	2	-0.106363	0.274801	Italy	Boscarol Xas0220	Oscar Boscarol Srl	Boscarol	PRK350	Aspirators
1.43099	-0.440785	-0.29063	0.412625	-0.372795	-0.0449093	-0.330369	0.658585	2	-0.106363	-1.4897	USA	Vacu-Max 605	Medical Industries America Inc	Vacu-Max	PRK350	Aspirators
-0.725432	-0.440785	-0.29063	0.412625	-0.372795	-0.0449093	-0.328527	0.658585	2	-0.106363	0.783834	Italy	Cormos Ob1000	Oscar Boscarol Srl	Boscarol	PRK350	Aspirators
1.83532	-0.440785	2.21895	0.412625	-0.372795	-0.0449093	-0.324614	0.658585	2	-0.106363	-1.81231	Australia	Clements Suc 84100	Clements Pty Ltd	Clements	PRK350	Aspirators
-0.994985	-0.440785	-0.29063	0.412625	-0.372795	-0.0449093	-0.329448	0.658585	2	-0.106363	0.933418	USA	DeVilbiss 7310PR-S	DeVilbiss Health Care LLC	DeVilbiss	PRK360	Aspirators
-0.994985	-0.440785	-0.29063	0.412625	-0.372795	-0.0449093	-0.329448	0.658585	2	-0.106363	0.933418	USA	DeVilbiss 7310PR-S	DeVilbiss Health Care LLC	DeVilbiss	PRK360	Aspirators
-0.994985	-0.440785	-0.29063	0.412625	-0.372795	-0.0449093	-0.329015	0.658585	2	-0.106363	1.04951	Turkey	Lifetime SA01PT	Elmaslar AS	Lifetime	PRK360	Aspirators
-0.994985	-0.440785	-0.29063	0.412625	-0.372795	-0.0449093	-0.330369	0.658585	2	-0.106363	1.04951	Turkey	Lifetime SA01PT	Elmaslar AS	Lifetime	PRK360	Aspirators
-1.12976	-0.440785	-0.29063	0.412625	-0.372795	-0.0449093	-0.330369	0.658585	2	-0.106363	1.07147	Italy	Spencer SC75560D-Ambu Jet P 1000B 10G	Spencer Italia Srl	Spencer	PRK360	Aspirators
-1.26454	-0.440785	-0.29063	0.412625	-0.372795	-0.0449093	-0.330369	0.658585	2	-0.106363	1.30068	Spain	Hersill V7 Plus B	Hersill Sl	Hersill	PRK360	Aspirators
0.083228	-0.440785	-0.29063	0.412625	-0.372795	-0.0449093	-0.232467	0.658585	2	-0.106363	-0.0958109	Australia	Clements Suc 84109	Clements Pty Ltd	Clements	PRK360	Aspirators
0.622335	-0.440785	-0.29063	0.412625	-0.372795	-0.0449093	-0.321861	0.658585	2	-0.106363	-0.687078	Italy	Boscarol Esv 158	Oscar Boscarol Srl	Boscarol	PRK360	Aspirators
0.352781	-0.440785	-0.29063	0.412625	-0.372795	-0.0449093	-0.209255	0.658585	2	-0.106363	-0.413584	Australia	Clements Suc 84109	Clements Pty Ltd	Clements	PRK360	Aspirators
-0.455879	-0.440785	-0.29063	0.412625	-0.372795	-0.0449093	-0.330369	0.658585	2	-0.106363	0.50848	USA	Sunrise Vacu-Aide 7305p-1	Sunrise Medical Inc	Sunrise	PRK360	Aspirators
0.757111	-0.440785	-0.29063	0.412625	-0.372795	-0.0449093	-0.326916	0.658585	2	-0.106363	-0.700474	UK	Oxylitre Ess200	Oxylitre Ltd	Oxylitre	PRK360	Aspirators
-0.590655	-0.440785	-0.29063	0.412625	-0.372795	-0.0449093	0.136887	0.658585	2	-0.106363	0.604854	Spain	Hersill V7 Plus B	Hersill Sl	Hersill	PRK360	Aspirators
-0.455879	-0.440785	-0.29063	0.412625	-0.372795	-0.0449093	-0.330369	0.658585	2	-0.106363	0.50848	USA	Sunrise Vacu-Aide 7305p-1	Sunrise Medical Inc	Sunrise	PRK360	Aspirators
0.352781	-0.440785	-0.29063	0.412625	-0.372795	-0.0449093	-0.330369	0.658585	2	-0.106363	-0.345118	Italy	New Askir 30	Ca-Mi Snc	New Askir	PRK360	Aspirators
-0.321102	-0.440785	-0.29063	0.412625	-0.372795	-0.0449093	-0.330369	0.658585	2	-0.106363	0.362245	Germany	Accuvac Basic	Weinmann GmbH + Co KG	Accuvac	PRK360	Aspirators
-0.321102	-0.440785	-0.29063	0.412625	-0.372795	-0.0449093	-0.328988	0.658585	2	-0.106363	0.362245	Germany	Accuvac Basic	Weinmann GmbH + Co KG	Accuvac	PRK360	Aspirators
0.083228	-0.440785	-0.29063	0.412625	-0.372795	-0.0449093	-0.299625	0.658585	2	-0.106363	-0.0958109	Australia	Clements Suc 84109	Clements Pty Ltd	Clements	PRK360	Aspirators
0.083228	-0.440785	-0.29063	0.412625	-0.372795	-0.0449093	-0.252327	0.658585	2	-0.106363	-0.0958109	Australia	Clements Suc 84109	Clements Pty Ltd	Clements	PRK360	Aspirators
1.02666	-0.440785	-0.29063	0.412625	-0.372795	-0.0449093	-0.328527	0.658585	2	-0.106363	-1.01788	UK	Eschmann VP 25	Eschmann Bros & Walsh Ltd	Eschmann	PRK360	Aspirators
0.622335	-0.440785	-0.29063	0.412625	-0.372795	-0.0449093	-0.327146	0.658585	2	-0.106363	-0.68745	UK	Oxylitre Ess5200	Oxylitre Ltd	Oxylitre	PRK360	Aspirators
0.083228	-0.440785	-0.29063	0.412625	-0.372795	-0.0449093	-0.330212	0.658585	2	-0.106363	-0.025856	Australia	Carrivac	Clements Medical Equipment Pty Ltd	Carrivac	PRK360	Aspirators
0.757111	-0.440785	-0.29063	0.412625	-0.372795	-0.0449093	-0.0490101	0.658585	2	-0.106363	-0.732102	UK	Eschmann VP 35	Eschmann Bros & Walsh Ltd	Eschmann	PRK360	Aspirators
0.757111	-0.440785	-0.29063	0.412625	-0.372795	-0.0449093	-0.229778	0.658585	2	-0.106363	-0.732102	UK	Eschmann VP 35	Eschmann Bros & Walsh Ltd	Eschmann	PRK360	Aspirators
0.487558	-0.440785	-0.29063	0.412625	-0.372795	-0.0449093	1.98935	0.658585	2	-0.106363	-0.428841	UK	Eschmann VP 35	Eschmann Bros & Walsh Ltd	Eschmann	PRK360	Aspirators
0.487558	-0.440785	-0.29063	0.412625	-0.372795	-0.0449093	0.544257	0.658585	2	-0.106363	-0.428841	UK	Eschmann VP 35	Eschmann Bros & Walsh Ltd	Eschmann	PRK360	Aspirators
1.43099	-0.440785	-0.29063	0.412625	-0.372795	-0.0449093	-0.330369	0.658585	2	-0.106363	-1.38253	Germany	Hico Rapidovac 791	Hirtz & Co Hospital Werk	Hico Rapidovac	PRK360	Aspirators
1.43099	-0.440785	-0.29063	0.412625	-0.372795	-0.0449093	-0.329264	0.658585	2	-0.106363	-1.38253	Germany	Hico Rapidovac 791	Hirtz & Co Hospital Werk	Hico Rapidovac	PRK360	Aspirators
-0.0515487	-0.440785	-0.29063	0.412625	-0.372795	-0.0449093	-0.328067	0.658585	2	-0.106363	-0.00539052	Germany	Unimat 30	Karl Storz Gmbh	Unimat	PRK360	Aspirators
0.757111	-0.440785	-0.29063	0.412625	-0.372795	-0.0449093	-0.321447	0.658585	2	-0.106363	-0.810243	Australia	Clements Hivac 84109	Clements Pty Ltd	Clements	PRK360	Aspirators
0.083228	-0.440785	-0.29063	0.412625	-0.372795	-0.0449093	-0.210213	0.658585	2	-0.106363	-0.0958109	Australia	Clements Suc 84109	Clements Pty Ltd	Clements	PRK360	Aspirators
0.083228	-0.440785	-0.29063	0.412625	-0.372795	-0.0449093	-0.330369	0.658585	2	-0.106363	-0.0958109	Australia	Clements Suc 84109	Clements Pty Ltd	Clements	PRK360	Aspirators
0.352781	-0.440785	-0.29063	0.412625	-0.372795	-0.0449093	-0.327763	0.658585	2	-0.106363	-0.32242	UK	Eschmann VP 35	Eschmann Bros & Walsh Ltd	Eschmann	PRK360	Aspirators
0.083228	-0.440785	-0.29063	0.412625	-0.372795	-0.0449093	-0.169544	0.658585	2	-0.106363	-0.1133	UK	Oxylitre Ess200	Oxylitre Ltd	Oxylitre	PRK360	Aspirators
0.083228	-0.440785	-0.29063	0.412625	-0.372795	-0.0449093	-0.329908	0.658585	2	-0.106363	-0.0195303	Italy	New Askir 230-12 BR	Ca-Mi Snc	New Askir	PRK360	Aspirators
-0.321102	-0.440785	-0.29063	0.412625	-0.372795	-0.0449093	-0.0605285	0.658585	2	-0.106363	0.328755	Italy	Boscarol Ob2012	Oscar Boscarol Srl	Boscarol	PRK360	Aspirators
-0.0515487	-0.440785	-0.29063	0.412625	-0.372795	-0.0449093	-0.271193	0.658585	2	-0.106363	-0.0132046	Italy	Boscarol Ob2012	Oscar Boscarol Srl	Boscarol	PRK360	Aspirators
-0.0515487	-0.440785	-0.29063	0.412625	-0.372795	-0.0449093	-0.328067	0.658585	2	-0.106363	-0.0132046	Italy	Boscarol Ob2012	Oscar Boscarol Srl	Boscarol	PRK360	Aspirators
-0.0515487	-0.440785	-0.29063	0.412625	-0.372795	-0.0449093	-0.28203	0.658585	2	-0.106363	-0.0132046	Italy	Boscarol Ob2012	Oscar Boscarol Srl	Boscarol	PRK360	Aspirators
0.622335	-0.440785	-0.29063	0.412625	-0.372795	-0.0449093	-0.330369	0.658585	2	-0.106363	-0.686334	USA	Medi-Pump 1132d	Thomas Industries Inc	Medi-Pump	PRK360	Aspirators
0.218005	-0.440785	2.21895	0.412625	-0.372795	-0.0449093	-0.193971	0.658585	2	-0.106363	-0.212278	Italy	Super Tobi	Gima SpA	Super	PRK360	Aspirators
-0.0515487	-0.440785	-0.29063	0.412625	-0.372795	-0.0449093	-0.0594328	0.658585	2	-0.106363	-0.00539052	Italy	Boscarol Ob2012	Oscar Boscarol Srl	Boscarol	PRK360	Aspirators
0.622335	-0.440785	-0.29063	0.412625	-0.372795	-0.0449093	-0.329448	0.658585	2	-0.106363	-0.689311	Italy	Boscarol 2012 Fa	Oscar Boscarol Srl	Boscarol	PRK360	Aspirators
-0.186325	-0.440785	-0.29063	0.412625	-0.372795	-0.0449093	-0.112384	0.658585	2	-0.106363	0.206707	Italy	New Hospivac 400	Ca-Mi Snc	Hospivac	PRK360	Aspirators
-0.321102	-0.440785	-0.29063	0.412625	-0.372795	-0.0449093	-0.330369	0.658585	2	-0.106363	0.304569	Italy	New Hospivac 400	Ca-Mi Snc	Hospivac	PRK360	Aspirators
-0.0515487	-0.440785	-0.29063	0.412625	-0.372795	-0.0449093	-0.328988	0.658585	2	-0.106363	-0.00501842	Italy	Boscarol Xas0220	Oscar Boscarol Srl	Boscarol	PRK360	Aspirators
1.16144	-0.440785	-0.29063	0.412625	-0.372795	-0.0449093	-0.135707	0.658585	2	-0.106363	-1.15369	Norway	Laerdal 780000	Laerdal Medical AS	Laerdal	PRK360	Aspirators
2.37443	2.26841	-0.29063	-1.1749	-0.372795	-0.0449093	-0.0837679	0.658585	2	-0.0460402	-2.34441	Japan	Olympus Cf-10l	Olympus Optical Co Ltd	Olympus	PRK300	Colonoscopes
2.10488	-0.440785	2.21895	-1.1749	-0.372795	-0.0449093	-0.317478	0.658585	2	-0.106363	-2.18441	Japan	Pentax Fc-38fx	Pentax Corp	Pentax	PRK320	Colonoscopes
-0.455879	-0.440785	-0.29063	-1.1749	-0.372795	-0.0449093	0.405198	0.658585	2	-0.106363	0.517038	Japan	Evis Exera Iii Cf-H190l	Olympus Optical Co Ltd	Olympus	PRK320	Colonoscopes
-0.590655	-0.440785	-0.29063	-1.1749	-0.372795	-0.0449093	5.5968	0.658585	2	-0.106363	0.617133	Germany	Stroz 13925 Pks	Karl Storz GmbH & Co KG	Stroz	PRK340	Colonoscopes
0.487558	-0.440785	-0.29063	-1.1749	-0.372795	-0.0449093	-0.320673	-1.51823	2	-0.0767522	-0.457864	Japan	Olympus Ocs-500	Olympus Optical Co Ltd	Olympus	PRK300	Colposcopes
1.43099	-0.440785	-0.29063	-1.1749	-0.372795	-0.0449093	-0.324771	-1.51823	2	-0.106363	-1.50756	USA	Coopersurgical 2f3	Coopersurgical Inc	Coopersurgical	PRK320	Colposcopes
0.487558	-0.440785	-0.29063	-1.1749	-0.372795	-0.0449093	-0.315177	-1.51823	2	-0.106363	-0.458237	USA	Medgyn Al-106	Medgyn	Medgyn	PRK340	Colposcopes
-0.590655	-0.440785	-0.29063	-1.1749	-0.372795	-0.0449093	-0.149214	-1.51823	2	-0.106363	0.640948	Germany	Leisegang 3mv	Leisegang Feinmechanik-Optik Gmbh	Leisegang	PRK340	Colposcopes
-1.12976	-0.440785	-0.29063	2.00015	2.23338	-0.0449093	-0.330369	0.658585	2	-0.106363	1.14589	USA	Zoll E Series	Zoll Medical Corp	Zoll	PRK312	Defibrillator
0.352781	-0.440785	-0.29063	2.00015	2.23338	-0.0449093	-0.329908	0.658585	2	-0.104021	-0.417678	Germany	Metrax M250	Metrax GmbH	Metrax	PRK312	Defibrillator
0.083228	-0.440785	-0.29063	2.00015	2.23338	-0.0449093	-0.329374	0.658585	2	-0.101678	-0.151254	Germany	Metrax M250	Metrax GmbH	Metrax	PRK312	Defibrillator
0.622335	-0.440785	-0.29063	2.00015	2.23338	-0.0449093	-0.330369	0.658585	2	-0.106363	-0.593309	Norway	Laerdal 20060	Laerdal Medical Corp	Laerdal	PRK312	Defibrillator
0.218005	-0.440785	-0.29063	2.00015	2.23338	-0.0449093	-0.329448	0.658585	2	-0.101678	-0.18772	Germany	Metrax M250	Metrax GmbH	Metrax	PRK312	Defibrillator
0.757111	2.26841	-0.29063	2.00015	2.23338	-0.0449093	-0.321484	0.658585	2	-0.0709091	-0.736195	Japan	Cardiolife TEC-5521K	Nihon Kohden Corp	Cardiolife	PRK312	Defibrillator
0.757111	2.26841	-0.29063	2.00015	2.23338	-0.0449093	-0.326833	0.658585	2	-0.0860824	-0.778987	Japan	Cardiolife TEC-5521K	Nihon Kohden Corp	Cardiolife	PRK312	Defibrillator
-0.590655	-0.440785	-0.29063	2.00015	2.23338	-0.0449093	-0.300749	0.658585	2	-0.0681987	0.536387	USA	Lifepak 15	Physio-Control Inc	Lifepak	PRK310	Defibrillator
0.891888	2.26841	-0.29063	2.00015	2.23338	-0.0449093	-0.174	0.658585	2	-0.0719732	-0.853035	Japan	Cardiolife TEC-7521K	Nihon Kohden Corp	Cardiolife	PRK310	Defibrillator
-0.994985	-0.440785	-0.29063	2.00015	2.23338	-0.0449093	-0.330369	0.658585	2	-0.106363	1.06775	Japan	Cardiolife TEC-5621K	Nihon Kohden Corp	Cardiolife	PRK310	Defibrillator
-1.12976	-0.440785	-0.29063	2.00015	2.23338	-0.0449093	-0.330369	0.658585	2	-0.106363	1.18347	Japan	Cardiolife TEC-5621	Nihon Kohden Corp	Nihon Kohden	PRK326	Defibrillator
0.352781	2.26841	-0.29063	2.00015	2.23338	-0.0449093	2.39685	0.658585	2	0.283887	-0.290791	Japan	Cardiolife TEC-5521K	Nihon Kohden Corp	Cardiolife	PRK326	Defibrillator
-0.994985	-0.440785	-0.29063	2.00015	2.23338	-0.0449093	-0.327763	0.658585	2	-0.10366	1.04058	Japan	Cardiolife TEC-5621K	Nihon Kohden Corp	Nihon Kohden	PRK333	Defibrillator
-0.455879	-0.440785	-0.29063	2.00015	2.23338	-0.0449093	-0.145789	0.658585	2	-0.0737501	0.40392	USA	Zoll M Series	Zoll Medical Corp	Zoll	PRK333	Defibrillator
-0.590655	-0.440785	-0.29063	2.00015	2.23338	-0.0449093	-0.328757	0.658585	2	-0.100272	0.623087	Japan	Cardiolife TEC-5621K	Nihon Kohden Corp	Cardiolife	PRK333	Defibrillator
-0.725432	-0.440785	-0.29063	2.00015	2.23338	-0.0449093	-0.330369	0.658585	2	-0.104853	0.778997	Japan	Cardiolife TEC-5621K	Nihon Kohden Corp	Cardiolife	PRK333	Defibrillator
0.622335	2.26841	-0.29063	2.00015	2.23338	-0.0449093	0.780003	0.658585	2	0.132177	-0.575076	Japan	Cardiolife TEC-5521K	Nihon Kohden Corp	Cardiolife	PRK333	Defibrillator
-0.590655	-0.440785	-0.29063	2.00015	2.23338	-0.0449093	-0.329651	0.658585	2	-0.105909	0.605226	Japan	Cardiolife TEC-5621K	Nihon Kohden Corp	Cardiolife	PRK319	Defibrillator
-0.455879	-0.440785	-0.29063	2.00015	2.23338	-0.0449093	-0.330369	0.658585	2	-0.106363	0.511085	USA	Lifepak 15	Physio-Control Inc	Lifepak	PRK319	Defibrillator
-0.0515487	-0.440785	-0.29063	2.00015	2.23338	-0.0449093	-0.182996	0.658585	2	-0.0979912	-0.00948362	Switzerland	Schiller Defigard 5000	Schiller AG	Schiller	PRK330	Defibrillator
-0.590655	-0.440785	-0.29063	2.00015	2.23338	-0.0449093	-0.239556	0.658585	2	-0.104857	0.607459	Japan	Cardiolife TEC-5621K	Nihon Kohden Corp	Cardiolife	PRK330	Defibrillator
1.16144	2.26841	2.21895	2.00015	2.23338	-0.0449093	-0.312571	0.658585	2	-0.00558913	-1.16634	USA	Lifepak 9	Physio-Control Corp	Lifepak	PRK330	Defibrillator
0.083228	2.26841	-0.29063	2.00015	2.23338	-0.0449093	-0.330369	0.658585	2	-0.0593329	-0.0359027	Japan	Cardiolife TEC-5521K	Nihon Kohden Corp	Cardiolife	PRK330	Defibrillator
-1.12976	-0.440785	-0.29063	2.00015	2.23338	-0.0449093	-0.330369	0.658585	2	-0.106363	1.18607	Japan	Cardiolife TEC-5621K	Nihon Kohden Corp	Cardiolife	PRK342	Defibrillator
-0.725432	-0.440785	-0.29063	2.00015	2.23338	-0.0449093	-0.330369	0.658585	2	0.107312	0.789416	USA	HeartStart MRx M3535A	Philips Medical Systems	HeartStart XL	PRK342	Defibrillator
0.352781	2.26841	-0.29063	2.00015	2.23338	-0.0449093	-0.327017	0.658585	2	0.0906859	-0.406142	Japan	Cardiolife TEC-5521K	Nihon Kohden Corp	Cardiolife	PRK342	Defibrillator
-1.12976	-0.440785	-0.29063	2.00015	2.23338	-0.0449093	-0.330369	0.658585	2	-0.106363	1.20207	Japan	Cardiolife TEC-5631	Nihon Kohden Corp	Cardiolife	PRK300	Defibrillator
-0.0515487	-0.440785	-0.29063	2.00015	2.23338	-0.0449093	-0.238452	0.658585	2	-0.106363	-0.0176698	USA	Responder 2000	GE Medical Systems	Responder	PRK300	Defibrillator
-0.455879	-0.440785	-0.29063	2.00015	2.23338	-0.0449093	-0.328177	0.658585	2	-0.106363	0.394245	USA	Philips 861290	Philips Medical Systems	Philips	PRK300	Defibrillator
-0.455879	-0.440785	-0.29063	2.00015	2.23338	-0.0449093	-0.321944	0.658585	2	-0.106363	0.394245	USA	Philips 861290	Philips Medical Systems	Philips	PRK300	Defibrillator
0.622335	-0.440785	-0.29063	2.00015	2.23338	-0.0449093	-0.329448	0.658585	2	-0.101678	-0.585867	USA	Ge Cardio-Serv	GE Medical Systems	GE	PRK300	Defibrillator
0.622335	-0.440785	-0.29063	2.00015	2.23338	-0.0449093	0.237339	0.658585	2	0.209027	-0.695636	Germany	Primedic HeartSave AED-M	Metrax GmbH	Primedic	PRK300	Defibrillator
1.43099	-0.440785	-0.29063	2.00015	2.23338	-0.0449093	-0.138883	0.658585	2	0.564202	-1.38328	USA	HeartStart FR2	Laerdal Medical Corp	HeartStart	PRK300	Defibrillator
-0.0515487	-0.440785	-0.29063	2.00015	2.23338	-0.0449093	-0.324384	0.658585	2	-0.106363	-0.00501842	USA	Zoll M Series	Zoll Medical Corp	Zoll	PRK300	Defibrillator
0.487558	-0.440785	-0.29063	2.00015	2.23338	-0.0449093	1.69103	0.658585	2	0.0959786	-0.428841	Germany	Primedic HeartSave AED-M	Metrax GmbH	Primedic	PRK300	Defibrillator
1.9701	-0.440785	-0.29063	2.00015	2.23338	-0.0449093	-0.326308	0.658585	2	-0.079417	-1.95482	Japan	Cardiolife TEC-7100K	Nihon Kohden Corp	Cardiolife	PRK300	Defibrillator
2.64398	-0.440785	2.21895	2.00015	2.23338	-0.0449093	-0.303207	0.658585	2	0.0591891	-2.71279	Japan	Cardiolife TEC-7100K	Nihon Kohden Corp	Cardiolife	PRK300	Defibrillator
2.64398	-0.440785	4.72854	2.00015	2.23338	-0.0449093	-0.306752	0.658585	2	-0.011984	-2.62907	Japan	Cardiolife TEC-7100K	Nihon Kohden Corp	Cardiolife	PRK300	Defibrillator
0.622335	-0.440785	2.21895	2.00015	2.23338	-0.0449093	-0.154895	0.658585	2	0.498771	-0.695636	Germany	Primedic HeartSave AED-M	Metrax GmbH	Primedic	PRK300	Defibrillator
1.43099	2.26841	-0.29063	2.00015	2.23338	-0.0449093	-0.304293	0.658585	2	0.149594	-1.37695	USA	Lifepak 9	Physio-Control Corp	Lifepak	PRK300	Defibrillator
1.43099	2.26841	-0.29063	2.00015	2.23338	-0.0449093	-0.121039	0.658585	2	0.183762	-1.39593	USA	Lifepak 9	Physio-Control Corp	Lifepak	PRK300	Defibrillator
1.43099	2.26841	-0.29063	2.00015	2.23338	-0.0449093	-0.211317	0.658585	2	0.0225525	-1.41937	USA	Lifepak 9	Physio-Control Corp	Lifepak	PRK300	Defibrillator
1.02666	2.26841	-0.29063	2.00015	2.23338	-0.0449093	-0.316788	0.658585	2	0.0179298	-1.1042	USA	Lifepak 9	Physio-Control Corp	Lifepak	PRK300	Defibrillator
2.10488	2.26841	-0.29063	2.00015	2.23338	-0.0449093	-0.297268	0.658585	2	0.188739	-2.06645	USA	Lifepak 9b	Physio-Control Corp	Lifepak	PRK300	Defibrillator
1.9701	2.26841	-0.29063	2.00015	2.23338	-0.0449093	-0.294046	0.658585	2	0.219253	-1.97268	USA	Lifepak 9b	Physio-Control Corp	Lifepak	PRK300	Defibrillator
1.56577	2.26841	-0.29063	2.00015	2.23338	-0.0449093	-0.320931	0.658585	2	-0.0554107	-1.63854	USA	Lifepak 9b	Physio-Control Corp	Lifepak	PRK300	Defibrillator
1.83532	2.26841	2.21895	2.00015	2.23338	-0.0449093	-0.312414	0.658585	2	-0.0138288	-1.82608	USA	Lifepak 9b	Physio-Control Corp	Lifepak	PRK300	Defibrillator
1.9701	2.26841	4.72854	2.00015	2.23338	-0.0449093	-0.276506	0.658585	2	0.272698	-1.97715	USA	Lifepak 9b	Physio-Control Corp	Lifepak	PRK300	Defibrillator
1.29622	2.26841	-0.29063	2.00015	2.23338	-0.0449093	-0.0675629	0.658585	2	0.345458	-1.26793	Japan	Cardiolife TEC-7521K	Nihon Kohden Corp	Cardiolife	PRK300	Defibrillator
1.29622	2.26841	-0.29063	2.00015	2.23338	-0.0449093	-0.311494	0.658585	2	0.104768	-1.26793	Japan	Cardiolife TEC-7521K	Nihon Kohden Corp	Cardiolife	PRK300	Defibrillator
1.29622	2.26841	-0.29063	2.00015	2.23338	-0.0449093	-0.314716	0.658585	2	0.0722634	-1.37137	Japan	Cardiolife TEC-7521K	Nihon Kohden Corp	Cardiolife	PRK300	Defibrillator
1.29622	2.26841	4.72854	2.00015	2.23338	-0.0449093	-0.285161	0.658585	2	0.215794	-1.37137	Japan	Cardiolife TEC-7521K	Nihon Kohden Corp	Cardiolife	PRK300	Defibrillator
0.352781	2.26841	-0.29063	2.00015	2.23338	-0.0449093	-0.294368	0.658585	2	0.195584	-0.296373	Japan	Cardiolife TEC-5521K	Nihon Kohden Corp	Cardiolife	PRK300	Defibrillator
0.218005	2.26841	-0.29063	2.00015	2.23338	-0.0449093	-0.109585	0.658585	2	0.259652	-0.28	Japan	Cardiolife TEC-5521K	Nihon Kohden Corp	Cardiolife	PRK300	Defibrillator
0.352781	2.26841	-0.29063	2.00015	2.23338	-0.0449093	-0.252797	0.658585	2	0.112639	-0.296373	Japan	Cardiolife TEC-5521K	Nihon Kohden Corp	Cardiolife	PRK300	Defibrillator
0.757111	2.26841	-0.29063	2.00015	2.23338	-0.0449093	0.248277	0.658585	2	0.136183	-0.703451	Japan	Cardiolife TEC-5521K	Nihon Kohden Corp	Cardiolife	PRK300	Defibrillator
0.083228	2.26841	-0.29063	2.00015	2.23338	-0.0449093	5.66817	0.658585	2	0.158105	-0.145672	Japan	Cardiolife TEC-5521K	Nihon Kohden Corp	Cardiolife	PRK300	Defibrillator
0.218005	2.26841	-0.29063	2.00015	2.23338	-0.0449093	0.98808	0.658585	2	0.281335	-0.283349	Japan	Cardiolife TEC-5521K	Nihon Kohden Corp	Cardiolife	PRK300	Defibrillator
0.218005	2.26841	4.72854	2.00015	2.23338	-0.0449093	2.29763	0.658585	2	0.0757774	-0.283349	Japan	Cardiolife TEC-5521K	Nihon Kohden Corp	Cardiolife	PRK300	Defibrillator
0.218005	2.26841	-0.29063	2.00015	2.23338	-0.0449093	0.895454	0.658585	2	0.301605	-0.283349	Japan	Cardiolife TEC-5521K	Nihon Kohden Corp	Cardiolife	PRK300	Defibrillator
0.083228	2.26841	-0.29063	2.00015	2.23338	-0.0449093	-0.061486	0.658585	2	0.106691	-0.145672	Japan	Cardiolife TEC-5521K	Nihon Kohden Corp	Cardiolife	PRK300	Defibrillator
-0.0515487	2.26841	-0.29063	2.00015	2.23338	-0.0449093	-0.286846	0.658585	2	-0.106363	-0.0117162	Japan	Cardiolife TEC-5521K	Nihon Kohden Corp	Cardiolife	PRK300	Defibrillator
0.218005	2.26841	-0.29063	2.00015	2.23338	-0.0449093	-0.319974	0.658585	2	0.291008	-0.283349	Japan	Cardiolife TEC-5521K	Nihon Kohden Corp	Cardiolife	PRK300	Defibrillator
0.757111	2.26841	-0.29063	2.00015	2.23338	-0.0449093	-0.265678	0.658585	2	0.0358019	-0.703451	Japan	Cardiolife TEC-5521K	Nihon Kohden Corp	Cardiolife	PRK300	Defibrillator
0.218005	2.26841	-0.29063	2.00015	2.23338	-0.0449093	-0.314946	0.658585	2	0.227412	-0.28	Japan	Cardiolife TEC-5521K	Nihon Kohden Corp	Cardiolife	PRK300	Defibrillator
0.218005	2.26841	-0.29063	2.00015	2.23338	-0.0449093	-0.328988	0.658585	2	-0.106363	-0.186975	Japan	Cardiolife TEC-5521K	Nihon Kohden Corp	Cardiolife	PRK341	Defibrillator
0.218005	2.26841	-0.29063	2.00015	2.23338	-0.0449093	-0.225791	0.658585	2	-0.106363	-0.183999	Japan	Cardiolife TEC-5521K	Nihon Kohden Corp	Cardiolife	PRK341	Defibrillator
0.218005	2.26841	-0.29063	2.00015	2.23338	-0.0449093	-0.0619924	0.658585	2	-0.106363	-0.28	Japan	Cardiolife TEC-5521K	Nihon Kohden Corp	Cardiolife	PRK341	Defibrillator
0.757111	-0.440785	-0.29063	2.00015	2.23338	-0.0449093	-0.323924	0.658585	2	-0.106363	-0.700846	Germany	HeartSave 6/65	Metrax GmbH	Metrax	PRK358	Defibrillator
-0.590655	-0.440785	-0.29063	2.00015	2.23338	-0.0449093	-0.328297	0.658585	2	-0.106363	0.594063	Japan	Cardiolife TEC-5621K	Nihon Kohden Corp	Cardiolife	PRK358	Defibrillator
-0.455879	-0.440785	-0.29063	2.00015	2.23338	-0.0449093	-0.324384	0.658585	2	-0.106363	0.517038	USA	HeartStart MRx M3535A	Philips Medical Systems	HeartStart XL	PRK358	Defibrillator
-0.455879	-0.440785	-0.29063	2.00015	2.23338	-0.0449093	-0.326916	0.658585	2	-0.106363	0.517038	USA	HeartStart MRx M3535A	Philips Medical Systems	HeartStart XL	PRK358	Defibrillator
-0.590655	-0.440785	-0.29063	2.00015	2.23338	-0.0449093	-0.329291	0.658585	2	-0.106363	0.601505	Japan	Cardiolife TEC-5621K	Nihon Kohden Corp	Cardiolife	PRK358	Defibrillator
-0.590655	-0.440785	-0.29063	2.00015	2.23338	-0.0449093	-0.31886	0.658585	2	-0.106363	0.593691	Turkey	Life-Point Pro	Metsis Medikal Elektronik Ltd Sti	Life-Point	PRK358	Defibrillator
1.29622	2.26841	2.21895	2.00015	2.23338	-0.0449093	-0.321852	0.658585	2	-0.106363	-1.36579	USA	Lifepak 9	Physio-Control Corp	Lifepak	PRK358	Defibrillator
1.29622	2.26841	-0.29063	2.00015	2.23338	-0.0449093	-0.323693	0.658585	2	-0.106363	-1.36579	USA	Lifepak 9	Physio-Control Corp	Lifepak	PRK358	Defibrillator
1.29622	2.26841	2.21895	2.00015	2.23338	-0.0449093	-0.328223	0.658585	2	-0.106363	-1.36579	USA	Lifepak 9	Physio-Control Corp	Lifepak	PRK358	Defibrillator
1.29622	2.26841	-0.29063	2.00015	2.23338	-0.0449093	-0.322008	0.658585	2	-0.106363	-1.36579	USA	Lifepak 9	Physio-Control Corp	Lifepak	PRK358	Defibrillator
1.29622	2.26841	-0.29063	2.00015	2.23338	-0.0449093	-0.324458	0.658585	2	-0.106363	-1.36579	USA	Lifepak 9	Physio-Control Corp	Lifepak	PRK358	Defibrillator
1.29622	2.26841	2.21895	2.00015	2.23338	-0.0449093	-0.324771	0.658585	2	-0.106363	-1.36579	USA	Lifepak 9	Physio-Control Corp	Lifepak	PRK358	Defibrillator
0.352781	2.26841	-0.29063	2.00015	2.23338	-0.0449093	0.0680155	0.658585	2	-0.106363	-0.40577	Japan	Cardiolife TEC-5521K	Nihon Kohden Corp	Cardiolife	PRK358	Defibrillator
-0.725432	-0.440785	-0.29063	2.00015	2.23338	-0.0449093	-0.200609	0.658585	2	-0.106363	0.768578	Italy	Saver One P	Ambi Medical System	Saver One	PRK320	Defibrillator
-0.725432	-0.440785	-0.29063	2.00015	2.23338	-0.0449093	0.895362	0.658585	2	-0.106363	0.789416	USA	HeartStart MRx M3535A	Philips Medical Systems	HeartStart XL	PRK320	Defibrillator
-0.860208	-0.440785	-0.29063	2.00015	2.23338	-0.0449093	-0.320388	0.658585	2	-0.106363	0.797974	USA	HeartStart MRx M3535A	Philips Medical Systems	HeartStart XL	PRK320	Defibrillator
-0.321102	-0.440785	-0.29063	2.00015	2.23338	-0.0449093	-0.304791	0.658585	2	-0.106363	0.258056	USA	Zoll M Series	Zoll Medical Corp	Zoll	PRK320	Defibrillator
-0.321102	-0.440785	-0.29063	2.00015	2.23338	-0.0449093	9.66215	0.658585	2	-0.106363	0.258056	USA	Zoll M Series	Zoll Medical Corp	Zoll	PRK320	Defibrillator
-0.455879	-0.440785	-0.29063	2.00015	2.23338	-0.0449093	-0.304211	0.658585	2	-0.106363	0.51741	USA	HeartStart MRx M3535A	Philips Medical Systems	HeartStart XL	PRK320	Defibrillator
-0.455879	-0.440785	-0.29063	2.00015	2.23338	-0.0449093	-0.305583	0.658585	2	-0.106363	0.51741	USA	HeartStart MRx M3535A	Philips Medical Systems	HeartStart XL	PRK320	Defibrillator
1.29622	2.26841	-0.29063	2.00015	2.23338	-0.0449093	-0.215313	0.658585	2	-0.106363	-1.24262	USA	Lifepak 9	Physio-Control Corp	Lifepak	PRK320	Defibrillator
1.43099	2.26841	2.21895	2.00015	2.23338	-0.0449093	-0.312856	0.658585	2	-0.106363	-1.41826	USA	Lifepak 9b	Physio-Control Corp	Lifepak	PRK320	Defibrillator
2.10488	2.26841	4.72854	2.00015	2.23338	-0.0449093	-0.315038	0.658585	2	-0.106363	-2.18441	USA	Lifepak 9b	Physio-Control Corp	Lifepak	PRK320	Defibrillator
2.10488	2.26841	4.72854	2.00015	2.23338	-0.0449093	-0.314072	0.658585	2	-0.106363	-2.18441	USA	Lifepak 9b	Physio-Control Corp	Lifepak	PRK320	Defibrillator
0.757111	2.26841	2.21895	2.00015	2.23338	-0.0449093	-0.286238	0.658585	2	-0.106363	-0.744382	Japan	Cardiolife TEC-5521K	Nihon Kohden Corp	Cardiolife	PRK320	Defibrillator
0.218005	2.26841	-0.29063	2.00015	2.23338	-0.0449093	-0.189671	0.658585	2	-0.106363	-0.17358	Japan	Cardiolife TEC-5521K	Nihon Kohden Corp	Cardiolife	PRK320	Defibrillator
0.757111	2.26841	-0.29063	2.00015	2.23338	-0.0449093	-0.0770649	0.658585	2	-0.106363	-0.703078	Japan	Cardiolife TEC-5521K	Nihon Kohden Corp	Cardiolife	PRK320	Defibrillator
0.757111	2.26841	-0.29063	2.00015	2.23338	-0.0449093	0.26474	0.658585	2	-0.106363	-0.757405	Japan	Cardiolife TEC-5521K	Nihon Kohden Corp	Cardiolife	PRK320	Defibrillator
0.352781	2.26841	-0.29063	2.00015	2.23338	-0.0449093	-0.174175	0.658585	2	-0.106363	-0.384189	Japan	Cardiolife TEC-5521K	Nihon Kohden Corp	Cardiolife	PRK320	Defibrillator
-0.725432	-0.440785	-0.29063	2.00015	2.23338	-0.0449093	-0.0289196	0.658585	2	-0.106363	0.789416	USA	HeartStart MRx M3535A	Philips Medical Systems	HeartStart XL	PRK311	Defibrillator
-1.12976	-0.440785	-0.29063	2.00015	2.23338	-0.0449093	-0.330369	0.658585	2	-0.106363	1.19277	Japan	Cardiolife TEC-5621K	Nihon Kohden Corp	Cardiolife	PRK340	Defibrillator
0.218005	-0.440785	-0.29063	2.00015	2.23338	-0.0449093	-0.329605	0.658585	2	-0.106363	-0.166138	USA	Powerheart Aed G3	Cardiac Science Corp	Powerheart	PRK340	Defibrillator
0.218005	-0.440785	-0.29063	2.00015	2.23338	-0.0449093	-0.327376	0.658585	2	-0.106363	-0.166138	USA	Powerheart Aed G3	Cardiac Science Corp	Powerheart	PRK340	Defibrillator
-0.0515487	-0.440785	-0.29063	2.00015	2.23338	-0.0449093	-0.318169	0.658585	2	-0.106363	-0.00948362	Switzerland	Schiller Defigard 5000	Schiller AG	Schiller	PRK340	Defibrillator
1.43099	-0.440785	-0.29063	2.00015	2.23338	-0.0449093	-0.325305	0.658585	2	-0.106363	-1.51016	Japan	Cardiolife TEC-7100K	Nihon Kohden Corp	Cardiolife	PRK340	Defibrillator
-0.321102	-0.440785	-0.29063	2.00015	2.23338	-0.0449093	0.791401	0.658585	2	-0.106363	0.347361	USA	Philips 861290	Philips Medical Systems	Philips	PRK340	Defibrillator
-0.455879	-0.440785	-0.29063	2.00015	2.23338	-0.0449093	-0.298217	0.658585	2	-0.106363	0.472014	USA	HeartStart MRx M3535A	Philips Medical Systems	HeartStart XL	PRK340	Defibrillator
-0.321102	-0.440785	-0.29063	2.00015	2.23338	-0.0449093	1.464	0.658585	2	-0.106363	0.347361	Switzerland	Schiller Defigard 5000	Schiller AG	Schiller	PRK340	Defibrillator
-0.590655	-0.440785	-0.29063	2.00015	2.23338	-0.0449093	-0.327293	0.658585	2	-0.106363	0.653971	Japan	Cardiolife TEC-5621K	Nihon Kohden Corp	Cardiolife	PRK340	Defibrillator
-0.455879	-0.440785	-0.29063	2.00015	2.23338	-0.0449093	-0.330369	0.658585	2	-0.106363	0.456386	South Korea	Cu Nf1200	Cu Medical Systems Inc	CU	PRK340	Defibrillator
0.891888	-0.440785	-0.29063	2.00015	2.23338	-0.0449093	0.377291	0.658585	2	-0.106363	-0.842244	Japan	Cardiolife TEC-7721K	Nihon Kohden Corp	Cardiolife	PRK340	Defibrillator
0.891888	-0.440785	-0.29063	2.00015	2.23338	-0.0449093	-0.152354	0.658585	2	-0.106363	-0.842244	Japan	Cardiolife TEC-7721K	Nihon Kohden Corp	Cardiolife	PRK340	Defibrillator
0.891888	-0.440785	-0.29063	2.00015	2.23338	-0.0449093	-0.205379	0.658585	2	-0.106363	-0.846709	Japan	Cardiolife TEC-7721K	Nihon Kohden Corp	Cardiolife	PRK340	Defibrillator
-0.590655	-0.440785	-0.29063	2.00015	2.23338	-0.0449093	-0.330369	0.658585	2	-0.106363	0.640948	Turkey	Life-Point Plus	Metsis Medikal Elektronik Ltd Sti	Life-Point	PRK340	Defibrillator
2.50921	-0.440785	4.72854	2.00015	2.23338	-0.0449093	-0.325305	0.658585	2	-0.106363	-2.48879	Japan	Cardiolife TEC-7100K	Nihon Kohden Corp	Cardiolife	PRK340	Defibrillator
0.891888	-0.440785	-0.29063	2.00015	2.23338	-0.0449093	-0.13486	0.658585	2	-0.106363	-0.842244	Japan	Cardiolife TEC-7721K	Nihon Kohden Corp	Cardiolife	PRK340	Defibrillator
-0.321102	-0.440785	-0.29063	2.00015	2.23338	-0.0449093	0.75878	0.658585	2	-0.106363	0.347361	Switzerland	Schiller Defigard 5000	Schiller AG	Schiller	PRK340	Defibrillator
-0.455879	-0.440785	-0.29063	2.00015	2.23338	-0.0449093	-0.330369	0.658585	2	-0.106363	0.505131	Turkey	Life-Point Pro	Metsis Medikal Elektronik Ltd Sti	Life-Point	PRK340	Defibrillator
1.9701	2.26841	-0.29063	2.00015	2.23338	-0.0449093	-0.296283	0.658585	2	-0.106363	-1.93361	USA	Lifepak 9b	Physio-Control Corp	Lifepak	PRK340	Defibrillator
1.83532	2.26841	-0.29063	2.00015	2.23338	-0.0449093	-0.21675	0.658585	2	-0.106363	-1.90422	USA	Lifepak 9b	Physio-Control Corp	Lifepak	PRK340	Defibrillator
-0.455879	2.26841	-0.29063	2.00015	2.23338	-0.0449093	-0.329752	0.658585	2	-0.106363	0.517038	Japan	Cardiolife TEC-5521K	Nihon Kohden Corp	Cardiolife	PRK340	Defibrillator
-0.0515487	2.26841	-0.29063	2.00015	2.23338	-0.0449093	3.25897	0.658585	2	-0.106363	-0.00390212	Japan	Cardiolife TEC-5521K	Nihon Kohden Corp	Cardiolife	PRK340	Defibrillator
0.083228	2.26841	-0.29063	2.00015	2.23338	-0.0449093	0.997794	0.658585	2	-0.106363	-0.153486	Japan	Cardiolife TEC-5521K	Nihon Kohden Corp	Cardiolife	PRK340	Defibrillator
-0.321102	2.26841	-0.29063	2.00015	2.23338	-0.0449093	-0.328214	0.658585	2	-0.106363	0.386803	Japan	Cardiolife TEC-5521K	Nihon Kohden Corp	Cardiolife	PRK340	Defibrillator
-0.321102	2.26841	-0.29063	2.00015	2.23338	-0.0449093	-0.329061	0.658585	2	-0.106363	0.386803	Japan	Cardiolife TEC-5521K	Nihon Kohden Corp	Cardiolife	PRK340	Defibrillator
0.757111	2.26841	-0.29063	2.00015	2.23338	-0.0449093	-0.326769	0.658585	2	-0.106363	-0.700102	Japan	Cardiolife TEC-5521K	Nihon Kohden Corp	Cardiolife	PRK340	Defibrillator
0.757111	2.26841	-0.29063	2.00015	2.23338	-0.0449093	-0.308115	0.658585	2	-0.106363	-0.700102	Japan	Cardiolife TEC-5521K	Nihon Kohden Corp	Cardiolife	PRK340	Defibrillator
-0.321102	2.26841	-0.29063	2.00015	2.23338	-0.0449093	-0.325609	0.658585	2	-0.106363	0.386803	Japan	Cardiolife TEC-5521K	Nihon Kohden Corp	Cardiolife	PRK340	Defibrillator
-0.455879	2.26841	-0.29063	2.00015	2.23338	-0.0449093	-0.32699	0.658585	2	-0.106363	0.517038	Japan	Cardiolife TEC-5521K	Nihon Kohden Corp	Cardiolife	PRK340	Defibrillator
-0.455879	2.26841	-0.29063	2.00015	2.23338	-0.0449093	4.64231	0.658585	2	-0.106363	0.517038	Japan	Cardiolife TEC-5521K	Nihon Kohden Corp	Cardiolife	PRK340	Defibrillator
-1.12976	-0.440785	-0.29063	2.00015	2.23338	-0.0449093	-0.330369	0.658585	2	-0.106363	1.19277	Japan	Cardiolife TEC-5621K	Nihon Kohden Corp	Cardiolife	PRK340	Defibrillator
-1.12976	2.26841	-0.29063	2.00015	2.23338	-0.0449093	-0.330369	0.658585	2	-0.106363	1.19277	Japan	Cardiolife TEC-5521K	Nihon Kohden Corp	Cardiolife	PRK340	Defibrillator
-1.12976	-0.440785	-0.29063	2.00015	2.23338	-0.0449093	-0.330369	0.658585	2	-0.106363	1.20319	Japan	Cardiolife TEC-5621K	Nihon Kohden Corp	Cardiolife	PRK340	Defibrillator
-1.12976	-0.440785	-0.29063	2.00015	2.23338	-0.0449093	-0.330369	0.658585	2	-0.106363	1.19612	Japan	Cardiolife TEC-3371K	Nihon Kohden Corp	Cardiolife	PRK340	Defibrillator
-1.12976	-0.440785	-0.29063	2.00015	2.23338	-0.0449093	-0.330369	0.658585	2	-0.106363	1.20356	Japan	Cardiolife TEC-5631K	Nihon Kohden Corporation	Cardiolife	PRK340	Defibrillator
-0.590655	-0.440785	-0.29063	2.00015	2.23338	-0.0449093	-0.326271	0.658585	2	-0.106363	0.528945	South Korea	Mediana D500m-Ls	Mediana Co Ltd	Mediana	PRK350	Defibrillator
-0.860208	-0.440785	-0.29063	2.00015	2.23338	-0.0449093	-0.330369	0.658585	2	-0.106363	0.854905	Japan	Cardiolife TEC-5621K	Nihon Kohden Corp	Cardiolife	PRK350	Defibrillator
1.02666	-0.440785	-0.29063	2.00015	2.23338	-0.0449093	0.290972	0.658585	2	-0.106363	-1.09899	USA	Lifepak 5	Physio-Control Corp	Lifepak	PRK350	Defibrillator
1.70055	2.26841	-0.29063	2.00015	2.23338	-0.0449093	-0.324614	0.658585	2	-0.106363	-1.67091	Japan	Cardiolife TEC-7521K	Nihon Kohden Corp	Cardiolife	PRK350	Defibrillator
0.218005	2.26841	2.21895	2.00015	2.23338	-0.0449093	-0.144269	0.658585	2	-0.106363	-0.178789	Japan	Cardiolife TEC-5521K	Nihon Kohden Corp	Cardiolife	PRK350	Defibrillator
-0.590655	2.26841	-0.29063	2.00015	2.23338	-0.0449093	-0.330369	0.658585	2	-0.106363	0.606714	Japan	Cardiolife TEC-5521K	Nihon Kohden Corp	Cardiolife	PRK350	Defibrillator
-0.994985	-0.440785	-0.29063	2.00015	2.23338	-0.0449093	-0.218601	0.658585	2	-0.106363	1.06514	USA	Efficia DFM100	Philips Healthcare	Efficia	PRK360	Defibrillator
1.02666	-0.440785	2.21895	2.00015	2.23338	-0.0449093	1.29859	0.658585	2	-0.106363	-1.01974	Japan	Cardiolife TEC-7721K	Nihon Kohden Corp	Cardiolife	PRK360	Defibrillator
-0.186325	-0.440785	-0.29063	2.00015	2.23338	-0.0449093	-0.190942	0.658585	2	-0.106363	0.165403	USA	Responder 2000	GE Medical Systems	Responder	PRK360	Defibrillator
-0.186325	-0.440785	-0.29063	2.00015	2.23338	-0.0449093	2.69763	0.658585	2	-0.106363	0.165403	USA	Responder 2000	GE Medical Systems	Responder	PRK360	Defibrillator
-0.186325	-0.440785	-0.29063	2.00015	2.23338	-0.0449093	-0.32431	0.658585	2	-0.106363	0.165403	USA	Responder 2000	GE Medical Systems	Responder	PRK360	Defibrillator
-0.186325	-0.440785	-0.29063	2.00015	2.23338	-0.0449093	-0.326759	0.658585	2	-0.106363	0.165403	USA	Responder 2000	GE Medical Systems	Responder	PRK360	Defibrillator
1.02666	-0.440785	-0.29063	2.00015	2.23338	-0.0449093	-0.314366	0.658585	2	-0.106363	-0.975456	Japan	Cardiolife TEC-7721K	Nihon Kohden Corp	Cardiolife	PRK360	Defibrillator
-0.455879	-0.440785	-0.29063	2.00015	2.23338	-0.0449093	-0.0808675	0.658585	2	-0.106363	0.50141	USA	HeartStart MRx M3535A	Philips Medical Systems	HeartStart XL	PRK360	Defibrillator
-0.590655	-0.440785	-0.29063	2.00015	2.23338	-0.0449093	-0.00916059	0.658585	2	-0.106363	0.526341	USA	HeartStart MRx M3535A	Philips Medical Systems	HeartStart XL	PRK360	Defibrillator
0.757111	-0.440785	2.21895	2.00015	2.23338	-0.0449093	-0.191605	0.658585	2	-0.106363	-0.700474	USA	Welch Allyn Pic 30	Welch Allyn Inc	Welch Allyn	PRK360	Defibrillator
-0.186325	-0.440785	-0.29063	2.00015	2.23338	-0.0449093	-0.329291	0.658585	2	-0.106363	0.165403	USA	Responder 2000	GE Medical Systems	Responder	PRK360	Defibrillator
1.16144	2.26841	-0.29063	2.00015	2.23338	-0.0449093	-0.150484	0.658585	2	-0.106363	-1.17118	USA	Lifepak 9b	Physio-Control Corp	Lifepak	PRK360	Defibrillator
-1.12976	-0.440785	-0.29063	0.412625	-0.372795	-0.0449093	-0.322542	0.658585	2	-0.106363	1.12803	Japan	Surdial 55 Plus	Nipro Corp	Nipro	PRK310	Hemodialysis Units
-0.590655	-0.440785	-0.29063	0.412625	-0.372795	-0.0449093	-0.289442	0.658585	2	-0.0526353	0.63425	Germany	Dialog+ 710200i	B Braun Avitum AG	Dialog	PRK310	Hemodialysis Units
-0.590655	-0.440785	-0.29063	0.412625	-0.372795	-0.0449093	-0.311282	0.658585	2	0.157191	0.63425	Germany	Dialog+ 710200i	B Braun Avitum AG	Dialog	PRK310	Hemodialysis Units
-0.590655	-0.440785	-0.29063	0.412625	-0.372795	-0.0449093	-0.302609	0.658585	2	0.0143737	0.63425	Germany	Dialog+ 710200i	B Braun Avitum AG	Dialog	PRK310	Hemodialysis Units
0.891888	-0.440785	-0.29063	0.412625	-0.372795	-0.0449093	-0.0164989	0.658585	2	1.8046	-0.870151	Germany	Fresenius 4008S	Fresenius Medical Care AG & Co KGaA	Fresenius	PRK310	Hemodialysis Units
0.891888	-0.440785	-0.29063	0.412625	-0.372795	-0.0449093	-0.0483103	0.658585	2	1.20048	-0.870151	Germany	Fresenius 4008S	Fresenius Medical Care AG & Co KGaA	Fresenius	PRK310	Hemodialysis Units
-0.321102	-0.440785	-0.29063	0.412625	-0.372795	-0.0449093	-0.286735	0.658585	2	0.183097	0.357407	Germany	Fresenius 4008S	Fresenius Medical Care AG & Co KGaA	Fresenius	PRK310	Hemodialysis Units
-0.590655	-0.440785	-0.29063	0.412625	-0.372795	-0.0449093	-0.277307	0.658585	2	0.0882572	0.534527	Germany	Fresenius 4008S	Fresenius Medical Care AG & Co KGaA	Fresenius	PRK310	Hemodialysis Units
-0.590655	-0.440785	-0.29063	0.412625	-0.372795	-0.0449093	-0.313657	0.658585	2	0.237757	0.534527	Germany	Fresenius 4008S	Fresenius Medical Care AG & Co KGaA	Fresenius	PRK310	Hemodialysis Units
0.891888	-0.440785	-0.29063	0.412625	-0.372795	-0.0449093	0.147687	0.658585	2	1.35158	-0.870151	Germany	Fresenius 4008S	Fresenius Medical Care AG & Co KGaA	Fresenius	PRK310	Hemodialysis Units
0.891888	-0.440785	-0.29063	0.412625	-0.372795	-0.0449093	-0.17261	0.658585	2	0.804504	-0.870151	Germany	Fresenius 4008S	Fresenius Medical Care AG & Co KGaA	Fresenius	PRK310	Hemodialysis Units
0.891888	-0.440785	4.72854	0.412625	-0.372795	-0.0449093	-0.276736	0.658585	2	0.0353667	-0.871268	Germany	Fresenius 4008S	Fresenius Medical Care AG & Co KGaA	Fresenius	PRK310	Hemodialysis Units
1.02666	-0.440785	4.72854	0.412625	-0.372795	-0.0449093	-0.312552	0.658585	2	0.00458439	-0.970619	Germany	Fresenius 4008S	Fresenius Medical Care AG & Co KGaA	Fresenius	PRK310	Hemodialysis Units
-0.590655	-0.440785	-0.29063	0.412625	-0.372795	-0.0449093	0.103961	0.658585	2	-0.0291421	0.649878	Germany	Dialog (+) Evo Light	B Braun Melsungen AG	B Braun	PRK326	Hemodialysis Units
-0.590655	-0.440785	-0.29063	0.412625	-0.372795	-0.0449093	0.081845	0.658585	2	-0.0954477	0.649878	Germany	Dialog (+) Evo Light	B Braun Melsungen AG	B Braun	PRK326	Hemodialysis Units
-0.590655	-0.440785	-0.29063	0.412625	-0.372795	-0.0449093	0.0947261	0.658585	2	0.0805277	0.63425	Germany	Dialog+	B Braun Melsungen AG	Dialog	PRK326	Hemodialysis Units
-0.590655	-0.440785	-0.29063	0.412625	-0.372795	-0.0449093	-0.309173	0.658585	2	-0.0696025	0.63425	Germany	Dialog+	B Braun Melsungen AG	Dialog	PRK326	Hemodialysis Units
-0.590655	-0.440785	-0.29063	0.412625	-0.372795	-0.0449093	-0.0745881	0.658585	2	-0.0707832	0.63425	Germany	Dialog+	B Braun Melsungen AG	Dialog	PRK326	Hemodialysis Units
-0.590655	-0.440785	-0.29063	0.412625	-0.372795	-0.0449093	0.84218	0.658585	2	0.101243	0.63425	Germany	Dialog+	B Braun Melsungen AG	Dialog	PRK326	Hemodialysis Units
-0.590655	-0.440785	-0.29063	0.412625	-0.372795	-0.0449093	-0.0404472	0.658585	2	0.018652	0.527085	Germany	Fresenius 4008S Next Generation	Fresenius Medical Care AG & Co KGaA	Fresenius	PRK326	Hemodialysis Units
-0.860208	-0.440785	-0.29063	0.412625	-0.372795	-0.0449093	-0.329908	0.658585	2	-0.0666794	0.899557	Germany	Fresenius 4008S Next Generation	Fresenius Medical Care AG & Co KGaA	Fresenius	PRK326	Hemodialysis Units
-1.12976	-0.440785	-0.29063	0.412625	-0.372795	-0.0449093	-0.330369	0.658585	2	-0.106363	1.12393	Japan	Surdial 55 Plus	Nipro Corp	Nipro	PRK333	Hemodialysis Units
-0.860208	-0.440785	-0.29063	0.412625	-0.372795	-0.0449093	-0.260089	0.658585	2	0.0463936	0.930069	Germany	Fresenius 4008S Next Generation	Fresenius Medical Care AG	Fresenius	PRK333	Hemodialysis Units
-0.860208	-0.440785	-0.29063	0.412625	-0.372795	-0.0449093	-0.309974	0.658585	2	-0.0878324	0.930069	Germany	Fresenius 4008S Next Generation	Fresenius Medical Care AG	Fresenius	PRK333	Hemodialysis Units
-0.860208	-0.440785	-0.29063	0.412625	-0.372795	-0.0449093	-0.274765	0.658585	2	-0.0912063	0.930069	Germany	Fresenius 4008S Next Generation	Fresenius Medical Care AG	Fresenius	PRK333	Hemodialysis Units
-0.860208	-0.440785	-0.29063	0.412625	-0.372795	-0.0449093	-0.317092	0.658585	2	-0.0997699	0.930069	Germany	Fresenius 4008S Next Generation	Fresenius Medical Care AG	Fresenius	PRK333	Hemodialysis Units
-0.860208	-0.440785	-0.29063	0.412625	-0.372795	-0.0449093	-0.324651	0.658585	2	-0.101038	0.930069	Germany	Fresenius 4008S Next Generation	Fresenius Medical Care AG	Fresenius	PRK333	Hemodialysis Units
-0.590655	-0.440785	-0.29063	0.412625	-0.372795	-0.0449093	-0.204301	0.658585	2	0.0783361	0.63425	Germany	Dialog Evo Light	B Braun Avitum	B Braun	PRK333	Hemodialysis Units
-0.590655	-0.440785	-0.29063	0.412625	-0.372795	-0.0449093	-0.313703	0.658585	2	0.043662	0.63425	Germany	Dialog Evo Light	B Braun Avitum	B Braun	PRK333	Hemodialysis Units
-0.590655	-0.440785	-0.29063	0.412625	-0.372795	-0.0449093	-0.159904	0.658585	2	-0.0270548	0.63425	Germany	Dialog Evo Light	B Braun Avitum	B Braun	PRK333	Hemodialysis Units
-0.590655	-0.440785	-0.29063	0.412625	-0.372795	-0.0449093	-0.253874	0.658585	2	-0.0370895	0.63425	Germany	Dialog Evo Light	B Braun Avitum	B Braun	PRK333	Hemodialysis Units
-0.590655	-0.440785	-0.29063	0.412625	-0.372795	-0.0449093	-0.139021	0.658585	2	0.188064	0.63425	Germany	Dialog Evo Light	B Braun Avitum	B Braun	PRK333	Hemodialysis Units
-0.321102	-0.440785	-0.29063	0.412625	-0.372795	-0.0449093	0.115894	0.658585	2	0.676228	0.365221	Germany	Fresenius 4008S	Fresenius Medical Care AG & Co KGaA	Fresenius	PRK333	Hemodialysis Units
-0.321102	-0.440785	-0.29063	0.412625	-0.372795	-0.0449093	0.256288	0.658585	2	2.99389	0.365221	Germany	Fresenius 4008S	Fresenius Medical Care AG & Co KGaA	Fresenius	PRK333	Hemodialysis Units
-0.321102	-0.440785	-0.29063	0.412625	-0.372795	-0.0449093	1.11846	0.658585	2	1.06876	0.365221	Germany	Fresenius 4008S	Fresenius Medical Care AG & Co KGaA	Fresenius	PRK333	Hemodialysis Units
0.622335	-0.440785	-0.29063	0.412625	-0.372795	-0.0449093	0.776329	0.658585	2	1.5069	-0.58996	Germany	Fresenius 4008S	Fresenius Medical Care AG & Co KGaA	Fresenius	PRK333	Hemodialysis Units
0.218005	-0.440785	-0.29063	0.412625	-0.372795	-0.0449093	0.23466	0.658585	2	0.613151	-0.254698	Germany	Fresenius 4008S	Fresenius Medical Care AG & Co KGaA	Fresenius	PRK333	Hemodialysis Units
0.218005	-0.440785	-0.29063	0.412625	-0.372795	-0.0449093	0.195178	0.658585	2	0.740832	-0.254698	Germany	Fresenius 4008S	Fresenius Medical Care AG & Co KGaA	Fresenius	PRK333	Hemodialysis Units
0.083228	-0.440785	-0.29063	0.412625	-0.372795	-0.0449093	0.468867	0.658585	2	0.616399	-0.103997	Germany	Fresenius 4008S	Fresenius Medical Care AG & Co KGaA	Fresenius	PRK333	Hemodialysis Units
0.083228	-0.440785	-0.29063	0.412625	-0.372795	-0.0449093	1.63427	0.658585	2	2.53602	-0.103997	Germany	Fresenius 4008S	Fresenius Medical Care AG & Co KGaA	Fresenius	PRK333	Hemodialysis Units
-0.590655	-0.440785	-0.29063	0.412625	-0.372795	-0.0449093	-0.0393515	0.658585	2	0.283253	0.528945	Germany	Fresenius 4008S Next Generation	Fresenius Medical Care AG & Co KGaA	Fresenius	PRK333	Hemodialysis Units
-0.725432	-0.440785	-0.29063	0.412625	-0.372795	-0.0449093	-0.227688	0.658585	2	0.295516	0.789043	Germany	Fresenius 4008S Next Generation	Fresenius Medical Care AG & Co KGaA	Fresenius	PRK333	Hemodialysis Units
-0.725432	-0.440785	-0.29063	0.412625	-0.372795	-0.0449093	-0.212809	0.658585	2	0.156727	0.789043	Germany	Fresenius 4008S Next Generation	Fresenius Medical Care AG & Co KGaA	Fresenius	PRK333	Hemodialysis Units
-0.725432	-0.440785	-0.29063	0.412625	-0.372795	-0.0449093	-0.314643	0.658585	2	0.119014	0.789043	Germany	Fresenius 4008S Next Generation	Fresenius Medical Care AG & Co KGaA	Fresenius	PRK333	Hemodialysis Units
-0.725432	-0.440785	-0.29063	0.412625	-0.372795	-0.0449093	-0.30247	0.658585	2	-0.041838	0.789043	Germany	Fresenius 4008S Next Generation	Fresenius Medical Care AG & Co KGaA	Fresenius	PRK333	Hemodialysis Units
-0.725432	-0.440785	-0.29063	0.412625	-0.372795	-0.0449093	-0.318731	0.658585	2	-0.0493345	0.789043	Germany	Fresenius 4008S Next Generation	Fresenius Medical Care AG & Co KGaA	Fresenius	PRK333	Hemodialysis Units
-0.590655	-0.440785	-0.29063	0.412625	-0.372795	-0.0449093	-0.255577	0.658585	2	-0.101675	0.63425	Germany	Dialog (+) Evo Light	B Braun Melsungen AG	B Braun	PRK319	Hemodialysis Units
-0.590655	-0.440785	-0.29063	0.412625	-0.372795	-0.0449093	-0.325747	0.658585	2	-0.105748	0.63425	Germany	Dialog (+) Evo Light	B Braun Melsungen AG	B Braun	PRK319	Hemodialysis Units
-0.590655	-0.440785	-0.29063	0.412625	-0.372795	-0.0449093	-0.234299	0.658585	2	-0.103061	0.63425	Germany	Dialog (+) Evo Light	B Braun Melsungen AG	B Braun	PRK319	Hemodialysis Units
0.757111	-0.440785	-0.29063	0.412625	-0.372795	-0.0449093	-0.0679864	0.658585	2	-0.0332575	-0.804662	Germany	Fresenius 4008S	Fresenius Medical Care AG & Co KGaA	Fresenius	PRK319	Hemodialysis Units
0.757111	-0.440785	-0.29063	0.412625	-0.372795	-0.0449093	0.0485512	0.658585	2	0.704287	-0.804662	Germany	Fresenius 4008S	Fresenius Medical Care AG & Co KGaA	Fresenius	PRK319	Hemodialysis Units
-0.186325	-0.440785	-0.29063	0.412625	-0.372795	-0.0449093	-0.0975145	0.658585	2	0.226078	0.237963	Germany	Fresenius 4008S NG	Fresenius Medical Care AG & Co KGaA	Fresenius	PRK319	Hemodialysis Units
-0.186325	-0.440785	-0.29063	0.412625	-0.372795	-0.0449093	0.133949	0.658585	2	-0.0380037	0.237963	Germany	Fresenius 4008S NG	Fresenius Medical Care AG & Co KGaA	Fresenius	PRK319	Hemodialysis Units
-0.186325	-0.440785	-0.29063	0.412625	-0.372795	-0.0449093	-0.00794522	0.658585	2	-0.034413	0.237963	Germany	Fresenius 4008S NG	Fresenius Medical Care AG & Co KGaA	Fresenius	PRK319	Hemodialysis Units
-0.455879	-0.440785	-0.29063	0.412625	-0.372795	-0.0449093	-0.0986378	0.658585	2	-0.105427	0.508108	Germany	Fresenius 4008S NG	Fresenius Medical Care AG & Co KGaA	Fresenius	PRK319	Hemodialysis Units
0.757111	-0.440785	-0.29063	0.412625	-0.372795	-0.0449093	0.260799	0.658585	2	0.245301	-0.804662	Germany	Fresenius 4008S	Fresenius Medical Care AG & Co KGaA	Fresenius	PRK319	Hemodialysis Units
0.622335	-0.440785	-0.29063	0.412625	-0.372795	-0.0449093	1.24855	0.658585	2	0.954089	-0.580657	Germany	Fresenius 4008S	Fresenius Medical Care AG & Co KGaA	Fresenius	PRK330	Hemodialysis Units
0.622335	-0.440785	-0.29063	0.412625	-0.372795	-0.0449093	-0.0306045	0.658585	2	0.790266	-0.580657	Germany	Fresenius 4008S	Fresenius Medical Care AG & Co KGaA	Fresenius	PRK330	Hemodialysis Units
0.083228	-0.440785	-0.29063	0.412625	-0.372795	-0.0449093	0.527528	0.658585	2	1.10313	-0.0310654	Germany	Fresenius 4008S	Fresenius Medical Care AG & Co KGaA	Fresenius	PRK330	Hemodialysis Units
0.083228	-0.440785	-0.29063	0.412625	-0.372795	-0.0449093	0.441982	0.658585	2	0.443402	-0.0310654	Germany	Fresenius 4008S	Fresenius Medical Care AG & Co KGaA	Fresenius	PRK330	Hemodialysis Units
0.083228	-0.440785	-0.29063	0.412625	-0.372795	-0.0449093	0.135846	0.658585	2	0.768549	-0.0310654	Germany	Fresenius 4008S	Fresenius Medical Care AG & Co KGaA	Fresenius	PRK330	Hemodialysis Units
0.083228	-0.440785	-0.29063	0.412625	-0.372795	-0.0449093	0.283275	0.658585	2	0.996184	-0.0641824	Germany	Fresenius 4008S OCM	Fresenius Medical Care AG & Co KGaA	Fresenius	PRK330	Hemodialysis Units
-0.590655	-0.440785	-0.29063	0.412625	-0.372795	-0.0449093	-0.0182851	0.658585	2	0.382296	0.63425	Germany	Dialog+	B Braun Melsungen AG	Dialog	PRK330	Hemodialysis Units
-0.590655	-0.440785	-0.29063	0.412625	-0.372795	-0.0449093	0.187527	0.658585	2	-0.0168303	0.63425	Germany	Dialog+	B Braun Melsungen AG	Dialog	PRK330	Hemodialysis Units
-0.590655	-0.440785	-0.29063	0.412625	-0.372795	-0.0449093	0.50671	0.658585	2	0.112915	0.63425	Germany	Dialog+	B Braun Melsungen AG	Dialog	PRK330	Hemodialysis Units
-0.590655	-0.440785	-0.29063	0.412625	-0.372795	-0.0449093	-0.118682	0.658585	2	-0.0194225	0.63425	Germany	Dialog+	B Braun Melsungen AG	Dialog	PRK330	Hemodialysis Units
-0.590655	-0.440785	-0.29063	0.412625	-0.372795	-0.0449093	-0.21373	0.658585	2	0.368131	0.527085	Germany	Fresenius 4008S	Fresenius Medical Care AG & Co KGaA	Fresenius	PRK330	Hemodialysis Units
-0.590655	-0.440785	-0.29063	0.412625	-0.372795	-0.0449093	0.111594	0.658585	2	0.0173682	0.527085	Germany	Fresenius 4008S	Fresenius Medical Care AG & Co KGaA	Fresenius	PRK330	Hemodialysis Units
-0.860208	-0.440785	-0.29063	0.412625	-0.372795	-0.0449093	-0.252106	0.658585	2	-0.101112	0.901046	Germany	Fresenius 4008S Next Generation	Fresenius Medical Care AG & Co KGaA	Fresenius	PRK330	Hemodialysis Units
-1.12976	-0.440785	-0.29063	0.412625	-0.372795	-0.0449093	-0.330369	0.658585	2	-0.106363	1.12393	Japan	Surdial 55 Plus	Nipro Corp	Nipro	PRK342	Hemodialysis Units
-0.590655	-0.440785	-0.29063	0.412625	-0.372795	-0.0449093	0.251371	0.658585	2	-0.0637008	0.63425	Germany	Dialog+ 710200i	B Braun Avitum AG	Dialog	PRK342	Hemodialysis Units
-0.590655	-0.440785	-0.29063	0.412625	-0.372795	-0.0449093	-0.326456	0.658585	2	-0.0643391	0.63425	Germany	Dialog+ 710200i	B Braun Avitum AG	Dialog	PRK342	Hemodialysis Units
0.218005	-0.440785	-0.29063	0.412625	-0.372795	-0.0449093	-0.182821	0.658585	2	0.436961	-0.254698	Germany	Fresenius 4008S	Fresenius Medical Care AG & Co KGaA	Fresenius	PRK342	Hemodialysis Units
0.083228	-0.440785	-0.29063	0.412625	-0.372795	-0.0449093	-0.0421598	0.658585	2	1.45336	-0.121114	Germany	Fresenius 4008S	Fresenius Medical Care AG & Co KGaA	Fresenius	PRK342	Hemodialysis Units
-0.321102	-0.440785	-0.29063	0.412625	-0.372795	-0.0449093	-0.0574808	0.658585	2	0.569187	0.383454	Germany	Fresenius 4008S	Fresenius Medical Care AG & Co KGaA	Fresenius	PRK342	Hemodialysis Units
-0.455879	-0.440785	-0.29063	0.412625	-0.372795	-0.0449093	-0.246057	0.658585	2	-0.0464156	0.510713	Germany	Fresenius 4008S	Fresenius Medical Care AG & Co KGaA	Fresenius	PRK342	Hemodialysis Units
-0.455879	-0.440785	-0.29063	0.412625	-0.372795	-0.0449093	-0.279498	0.658585	2	0.972936	0.510713	Germany	Fresenius 4008S	Fresenius Medical Care AG & Co KGaA	Fresenius	PRK342	Hemodialysis Units
-0.455879	-0.440785	-0.29063	0.412625	-0.372795	-0.0449093	-0.119686	0.658585	2	0.12479	0.510713	Germany	Fresenius 4008S	Fresenius Medical Care AG & Co KGaA	Fresenius	PRK342	Hemodialysis Units
-0.455879	-0.440785	-0.29063	0.412625	-0.372795	-0.0449093	-0.330369	0.658585	2	0.245837	0.510713	Germany	Fresenius 4008S	Fresenius Medical Care AG & Co KGaA	Fresenius	PRK342	Hemodialysis Units
0.218005	-0.440785	-0.29063	0.412625	-0.372795	-0.0449093	0.231538	0.658585	2	1.50689	-0.254698	Germany	Fresenius 4008S	Fresenius Medical Care AG & Co KGaA	Fresenius	PRK342	Hemodialysis Units
-0.455879	-0.440785	-0.29063	0.412625	-0.372795	-0.0449093	-0.240588	0.658585	2	0.0191287	0.506619	Germany	Fresenius 4008S Next Generation	Fresenius Medical Care AG & Co KGaA	Fresenius	PRK342	Hemodialysis Units
-1.12976	-0.440785	-0.29063	0.412625	-0.372795	-0.0449093	-0.322064	0.658585	2	-0.106363	1.18868	Germany	Fresenius 4008S Next Generation	Fresenius Medical Care AG	Fresenius	PRK300	Hemodialysis Units
-1.26454	-0.440785	-0.29063	0.412625	-0.372795	-0.0449093	-0.330369	0.658585	2	-0.106363	1.31854	Germany	Fresenius 5008S	Fresenius AG	Fresenius	PRK300	Hemodialysis Units
-1.26454	-0.440785	-0.29063	0.412625	-0.372795	-0.0449093	-0.330369	0.658585	2	-0.106363	1.31854	Germany	Fresenius 5008S	Fresenius AG	Fresenius	PRK300	Hemodialysis Units
-1.26454	-0.440785	-0.29063	0.412625	-0.372795	-0.0449093	-0.330369	0.658585	2	-0.106363	1.25082	Japan	Surdial 55 Plus	Nipro Corp	Surdial	PRK300	Hemodialysis Units
-1.26454	-0.440785	-0.29063	0.412625	-0.372795	-0.0449093	-0.330369	0.658585	2	-0.106363	1.25082	Japan	Surdial 55 Plus	Nipro Corp	Surdial	PRK300	Hemodialysis Units
-1.26454	-0.440785	-0.29063	0.412625	-0.372795	-0.0449093	-0.330369	0.658585	2	-0.106363	1.25082	Japan	Surdial 55 Plus	Nipro Corp	Surdial	PRK300	Hemodialysis Units
-1.26454	-0.440785	-0.29063	0.412625	-0.372795	-0.0449093	-0.330369	0.658585	2	-0.106363	1.25082	Japan	Surdial 55 Plus	Nipro Corp	Surdial	PRK300	Hemodialysis Units
-1.26454	-0.440785	-0.29063	0.412625	-0.372795	-0.0449093	-0.330369	0.658585	2	-0.106363	1.25082	Japan	Surdial 55 Plus	Nipro Corp	Surdial	PRK300	Hemodialysis Units
-1.26454	-0.440785	-0.29063	0.412625	-0.372795	-0.0449093	-0.330369	0.658585	2	-0.106363	1.25082	Japan	Surdial 55 Plus	Nipro Corp	Surdial	PRK300	Hemodialysis Units
-0.860208	-0.440785	-0.29063	0.412625	-0.372795	-0.0449093	-0.327947	0.658585	2	-0.106363	0.898813	Germany	Fresenius 4008S NG	Fresenius Medical Care AG & Co KGaA	Fresenius	PRK300	Hemodialysis Units
-0.860208	-0.440785	-0.29063	0.412625	-0.372795	-0.0449093	-0.31386	0.658585	2	-0.106363	0.898813	Germany	Fresenius 4008S NG	Fresenius Medical Care AG & Co KGaA	Fresenius	PRK300	Hemodialysis Units
-0.725432	-0.440785	-0.29063	0.412625	-0.372795	-0.0449093	-0.257308	0.658585	2	-0.106363	0.729135	Germany	Fresenius 4008S	Fresenius Medical Care AG & Co KGaA	Fresenius	PRK300	Hemodialysis Units
-0.590655	-0.440785	-0.29063	0.412625	-0.372795	-0.0449093	0.223123	0.658585	2	-0.106363	0.534155	Germany	Fresenius 4008S New Generation	Fresenius Medical Care AG & Co KGaA	Fresenius	PRK300	Hemodialysis Units
-0.590655	-0.440785	-0.29063	0.412625	-0.372795	-0.0449093	-0.243424	0.658585	2	-0.106363	0.534155	Germany	Fresenius 4008S New Generation	Fresenius Medical Care AG & Co KGaA	Fresenius	PRK300	Hemodialysis Units
-0.590655	-0.440785	-0.29063	0.412625	-0.372795	-0.0449093	-0.248589	0.658585	2	-0.106363	0.534155	Germany	Fresenius 4008S New Generation	Fresenius Medical Care AG & Co KGaA	Fresenius	PRK300	Hemodialysis Units
0.757111	-0.440785	-0.29063	0.412625	-0.372795	-0.0449093	0.342321	0.658585	2	2.37256	-0.751451	Germany	Fresenius 4008S	Fresenius Medical Care AG & Co KGaA	Fresenius	PRK300	Hemodialysis Units
0.891888	-0.440785	-0.29063	0.412625	-0.372795	-0.0449093	0.0424835	0.658585	2	2.04169	-0.965781	Germany	Fresenius 4008S	Fresenius Medical Care AG & Co KGaA	Fresenius	PRK300	Hemodialysis Units
0.218005	-0.440785	-0.29063	0.412625	-0.372795	-0.0449093	-0.224447	0.658585	2	0.961402	-0.266977	Germany	Fresenius 4008S	Fresenius Medical Care AG & Co KGaA	Fresenius	PRK300	Hemodialysis Units
0.218005	-0.440785	-0.29063	0.412625	-0.372795	-0.0449093	-0.00983273	0.658585	2	2.40325	-0.266977	Germany	Fresenius 4008S	Fresenius Medical Care AG & Co KGaA	Fresenius	PRK300	Hemodialysis Units
1.29622	-0.440785	-0.29063	0.412625	-0.372795	-0.0449093	0.347533	0.658585	2	3.14054	-1.29546	Germany	Fresenius 4008S	Fresenius Medical Care AG & Co KGaA	Fresenius	PRK300	Hemodialysis Units
1.29622	-0.440785	4.72854	0.412625	-0.372795	-0.0449093	-0.083197	0.658585	2	5.96304	-1.29546	Germany	Fresenius 4008S	Fresenius Medical Care AG & Co KGaA	Fresenius	PRK300	Hemodialysis Units
0.891888	-0.440785	-0.29063	0.412625	-0.372795	-0.0449093	0.0614783	0.658585	2	3.23401	-0.965781	Germany	Fresenius 4008S	Fresenius Medical Care AG & Co KGaA	Fresenius	PRK300	Hemodialysis Units
1.02666	-0.440785	-0.29063	0.412625	-0.372795	-0.0449093	-0.0543043	0.658585	2	3.13834	-1.05509	Germany	Fresenius 4008S	Fresenius Medical Care AG & Co KGaA	Fresenius	PRK300	Hemodialysis Units
1.02666	-0.440785	4.72854	0.412625	-0.372795	-0.0449093	-0.0945129	0.658585	2	3.67633	-1.02234	Germany	Fresenius 4008S	Fresenius Medical Care AG & Co KGaA	Fresenius	PRK300	Hemodialysis Units
1.02666	-0.440785	4.72854	0.412625	-0.372795	-0.0449093	0.0362133	0.658585	2	4.26902	-1.02234	Germany	Fresenius 4008S	Fresenius Medical Care AG & Co KGaA	Fresenius	PRK300	Hemodialysis Units
0.891888	-0.440785	-0.29063	0.412625	-0.372795	-0.0449093	0.592062	0.658585	2	3.52838	-0.965781	Germany	Fresenius 4008S	Fresenius Medical Care AG & Co KGaA	Fresenius	PRK300	Hemodialysis Units
1.02666	-0.440785	-0.29063	0.412625	-0.372795	-0.0449093	0.106493	0.658585	2	3.34454	-1.05509	Germany	Fresenius 4008S	Fresenius Medical Care AG & Co KGaA	Fresenius	PRK300	Hemodialysis Units
1.16144	-0.440785	4.72854	0.412625	-0.372795	-0.0449093	-0.115395	0.658585	2	3.9647	-1.15369	Germany	Fresenius 4008S	Fresenius Medical Care AG & Co KGaA	Fresenius	PRK300	Hemodialysis Units
1.29622	-0.440785	-0.29063	0.412625	-0.372795	-0.0449093	0.419645	0.658585	2	2.20212	-1.29546	Germany	Fresenius 4008S	Fresenius Medical Care AG & Co KGaA	Fresenius	PRK300	Hemodialysis Units
-0.321102	-0.440785	-0.29063	0.412625	-0.372795	-0.0449093	0.194083	0.658585	2	-0.106363	0.360012	Germany	Fresenius 4008S	Fresenius Medical Care AG & Co KGaA	Fresenius	PRK300	Hemodialysis Units
1.02666	-0.440785	-0.29063	0.412625	-0.372795	-0.0449093	0.403919	0.658585	2	2.76411	-1.05509	Germany	Fresenius 4008S	Fresenius Medical Care AG & Co KGaA	Fresenius	PRK300	Hemodialysis Units
0.218005	-0.440785	-0.29063	0.412625	-0.372795	-0.0449093	0.241565	0.658585	2	2.22672	-0.266977	Germany	Fresenius 4008s Arrtplus	Fresenius Medical Care AG & Co KGaA	Fresenius	PRK300	Hemodialysis Units
-0.590655	-0.440785	-0.29063	0.412625	-0.372795	-0.0449093	-0.159664	0.658585	2	-0.106363	0.63425	Germany	Fresenius 4008S New Generation	Fresenius Medical Care AG & Co KGaA	Fresenius	PRK300	Hemodialysis Units
-0.590655	-0.440785	-0.29063	0.412625	-0.372795	-0.0449093	-0.153541	0.658585	2	-0.106363	0.63425	Germany	Fresenius 4008S New Generation	Fresenius Medical Care AG & Co KGaA	Fresenius	PRK300	Hemodialysis Units
-0.590655	-0.440785	-0.29063	0.412625	-0.372795	-0.0449093	-0.044213	0.658585	2	-0.106363	0.63425	Germany	Fresenius 4008S New Generation	Fresenius Medical Care AG & Co KGaA	Fresenius	PRK300	Hemodialysis Units
-0.590655	-0.440785	-0.29063	0.412625	-0.372795	-0.0449093	-0.319799	0.658585	2	-0.106363	0.63425	Germany	Fresenius 4008S New Generation	Fresenius Medical Care AG & Co KGaA	Fresenius	PRK300	Hemodialysis Units
-0.590655	-0.440785	-0.29063	0.412625	-0.372795	-0.0449093	-0.156018	0.658585	2	-0.106363	0.63425	Germany	Fresenius 4008S New Generation	Fresenius Medical Care AG & Co KGaA	Fresenius	PRK300	Hemodialysis Units
-0.590655	-0.440785	-0.29063	0.412625	-0.372795	-0.0449093	-0.233581	0.658585	2	-0.106363	0.63425	Germany	Fresenius 4008S New Generation	Fresenius Medical Care AG & Co KGaA	Fresenius	PRK300	Hemodialysis Units
-0.590655	-0.440785	-0.29063	0.412625	-0.372795	-0.0449093	0.142098	0.658585	2	-0.106363	0.63425	Germany	Fresenius 4008S New Generation	Fresenius Medical Care AG & Co KGaA	Fresenius	PRK300	Hemodialysis Units
-0.590655	-0.440785	-0.29063	0.412625	-0.372795	-0.0449093	-0.0361382	0.658585	2	-0.106363	0.63425	Germany	Fresenius 4008S New Generation	Fresenius Medical Care AG & Co KGaA	Fresenius	PRK300	Hemodialysis Units
-0.590655	-0.440785	-0.29063	0.412625	-0.372795	-0.0449093	-0.0126226	0.658585	2	-0.106363	0.63425	Germany	Fresenius 4008S New Generation	Fresenius Medical Care AG & Co KGaA	Fresenius	PRK300	Hemodialysis Units
-0.590655	-0.440785	-0.29063	0.412625	-0.372795	-0.0449093	-0.31955	0.658585	2	-0.106363	0.63425	Germany	Fresenius 4008S New Generation	Fresenius Medical Care AG & Co KGaA	Fresenius	PRK300	Hemodialysis Units
0.218005	-0.440785	-0.29063	0.412625	-0.372795	-0.0449093	0.4916	0.658585	2	2.23863	-0.259163	Sweden	Gambro AK 200 Ultra S	Gambro AB	Gambro	PRK300	Hemodialysis Units
0.218005	-0.440785	-0.29063	0.412625	-0.372795	-0.0449093	1.84143	0.658585	2	1.93873	-0.259163	Sweden	Gambro AK 200 Ultra S	Gambro AB	Gambro	PRK300	Hemodialysis Units
0.218005	-0.440785	-0.29063	0.412625	-0.372795	-0.0449093	0.508827	0.658585	2	1.67011	-0.259163	Sweden	Gambro AK 200 Ultra S	Gambro AB	Gambro	PRK300	Hemodialysis Units
-0.321102	-0.440785	-0.29063	0.412625	-0.372795	-0.0449093	-0.179856	0.658585	2	-0.106363	0.360012	Germany	Fresenius 4008S	Fresenius Medical Care AG & Co KGaA	Fresenius	PRK300	Hemodialysis Units
0.757111	-0.440785	-0.29063	0.412625	-0.372795	-0.0449093	0.105407	0.658585	2	2.65317	-0.702706	Germany	Fresenius 4008S	Fresenius Medical Care AG & Co KGaA	Fresenius	PRK300	Hemodialysis Units
0.757111	-0.440785	-0.29063	0.412625	-0.372795	-0.0449093	-0.134123	0.658585	2	1.85719	-0.702706	Germany	Fresenius 4008S	Fresenius Medical Care AG & Co KGaA	Fresenius	PRK300	Hemodialysis Units
0.757111	-0.440785	-0.29063	0.412625	-0.372795	-0.0449093	0.00950274	0.658585	2	2.42404	-0.702706	Germany	Fresenius 4008S	Fresenius Medical Care AG & Co KGaA	Fresenius	PRK300	Hemodialysis Units
-0.0515487	-0.440785	-0.29063	0.412625	-0.372795	-0.0449093	-0.220847	0.658585	2	-0.106363	0.106984	Germany	Fresenius 4008S New Generation	Fresenius Medical Care AG & Co KGaA	Fresenius	PRK300	Hemodialysis Units
-0.725432	-0.440785	-0.29063	0.412625	-0.372795	-0.0449093	2.2213	0.658585	2	-0.106363	0.662529	Germany	Fresenius 5008S	Fresenius AG	Fresenius	PRK300	Hemodialysis Units
0.757111	-0.440785	-0.29063	0.412625	-0.372795	-0.0449093	0.0823882	0.658585	2	2.67807	-0.702706	Germany	Fresenius 4008S	Fresenius Medical Care AG & Co KGaA	Fresenius	PRK300	Hemodialysis Units
0.891888	-0.440785	-0.29063	0.412625	-0.372795	-0.0449093	0.783833	0.658585	2	2.06369	-0.853407	Germany	Fresenius 4008S	Fresenius Medical Care AG & Co KGaA	Fresenius	PRK300	Hemodialysis Units
-0.321102	-0.440785	-0.29063	0.412625	-0.372795	-0.0449093	-0.0632262	0.658585	2	-0.106363	0.360012	Germany	Fresenius 4008S	Fresenius Medical Care AG & Co KGaA	Fresenius	PRK300	Hemodialysis Units
-0.321102	-0.440785	-0.29063	0.412625	-0.372795	-0.0449093	0.116888	0.658585	2	-0.106363	0.360012	Germany	Fresenius 4008S	Fresenius Medical Care AG & Co KGaA	Fresenius	PRK300	Hemodialysis Units
-0.590655	-0.440785	-0.29063	0.412625	-0.372795	-0.0449093	-0.330369	0.658585	2	-0.106363	0.63425	Germany	Dialog+ 710200i	B Braun Avitum AG	Dialog	PRK341	Hemodialysis Units
-0.590655	-0.440785	-0.29063	0.412625	-0.372795	-0.0449093	-0.330369	0.658585	2	-0.106363	0.63425	Germany	Dialog+ 710200i	B Braun Avitum AG	Dialog	PRK341	Hemodialysis Units
-0.321102	-0.440785	-0.29063	0.412625	-0.372795	-0.0449093	0.0344363	0.658585	2	-0.106363	0.373035	Germany	Fresenius 4008S	Fresenius Medical Care AG & Co KGaA	Fresenius	PRK341	Hemodialysis Units
-0.321102	-0.440785	-0.29063	0.412625	-0.372795	-0.0449093	-0.171385	0.658585	2	-0.106363	0.373035	Germany	Fresenius 4008S	Fresenius Medical Care AG & Co KGaA	Fresenius	PRK341	Hemodialysis Units
-0.321102	-0.440785	-0.29063	0.412625	-0.372795	-0.0449093	0.0565984	0.658585	2	-0.106363	0.373035	Germany	Fresenius 4008S	Fresenius Medical Care AG & Co KGaA	Fresenius	PRK341	Hemodialysis Units
0.757111	-0.440785	-0.29063	0.412625	-0.372795	-0.0449093	0.128784	0.658585	2	-0.106363	-0.771173	Germany	Fresenius 4008S	Fresenius Medical Care AG & Co KGaA	Fresenius	PRK341	Hemodialysis Units
-0.455879	-0.440785	-0.29063	0.412625	-0.372795	-0.0449093	-0.320627	0.658585	2	-0.106363	0.504015	Germany	Fresenius 4008S	Fresenius Medical Care AG & Co KGaA	Fresenius	PRK341	Hemodialysis Units
-0.590655	-0.440785	-0.29063	0.412625	-0.372795	-0.0449093	-0.307286	0.658585	2	-0.106363	0.602993	Germany	Fresenius 4008S	Fresenius Medical Care AG & Co KGaA	Fresenius	PRK341	Hemodialysis Units
-0.860208	-0.440785	-0.29063	0.412625	-0.372795	-0.0449093	-0.330369	0.658585	2	-0.106363	0.893604	Germany	Fresenius 4008 S Ng	Fresenius Medical Care AG & Co. KGaA	Fresenius	PRK341	Hemodialysis Units
-0.860208	-0.440785	-0.29063	0.412625	-0.372795	-0.0449093	-0.330369	0.658585	2	-0.106363	0.870906	Germany	Fresenius 4008 S Ng	Fresenius Medical Care AG & Co. KGaA	Fresenius	PRK341	Hemodialysis Units
-1.26454	-0.440785	-0.29063	0.412625	-0.372795	-0.0449093	-0.330369	0.658585	2	-0.106363	1.29473	Germany	Fresenius 4008S Next Generation	Fresenius Medical Care AG & Co KGaA	Fresenius	PRK358	Hemodialysis Units
-0.860208	-0.440785	-0.29063	0.412625	-0.372795	-0.0449093	-0.279526	0.658585	2	-0.106363	0.924488	Germany	Fresenius 4008S	Fresenius Medical Care AG & Co KGaA	Fresenius	PRK358	Hemodialysis Units
-0.860208	-0.440785	-0.29063	0.412625	-0.372795	-0.0449093	-0.291836	0.658585	2	-0.106363	0.924488	Germany	Fresenius 4008S	Fresenius Medical Care AG & Co KGaA	Fresenius	PRK358	Hemodialysis Units
-0.860208	-0.440785	-0.29063	0.412625	-0.372795	-0.0449093	-0.305039	0.658585	2	-0.106363	0.870161	Germany	Fresenius 4008S	Fresenius Medical Care AG & Co KGaA	Fresenius	PRK358	Hemodialysis Units
-0.860208	-0.440785	-0.29063	0.412625	-0.372795	-0.0449093	-0.268403	0.658585	2	-0.106363	0.870161	Germany	Fresenius 4008S	Fresenius Medical Care AG & Co KGaA	Fresenius	PRK358	Hemodialysis Units
-0.860208	-0.440785	-0.29063	0.412625	-0.372795	-0.0449093	-0.29109	0.658585	2	-0.106363	0.865324	Germany	Fresenius 4008S	Fresenius Medical Care AG & Co KGaA	Fresenius	PRK358	Hemodialysis Units
-0.860208	-0.440785	-0.29063	0.412625	-0.372795	-0.0449093	-0.280299	0.658585	2	-0.106363	0.865324	Germany	Fresenius 4008S	Fresenius Medical Care AG & Co KGaA	Fresenius	PRK358	Hemodialysis Units
0.083228	-0.440785	-0.29063	0.412625	-0.372795	-0.0449093	2.58032	0.658585	2	-0.106363	-0.0359027	Germany	Fresenius 4008S	Fresenius Medical Care AG & Co KGaA	Fresenius	PRK358	Hemodialysis Units
-0.455879	-0.440785	-0.29063	0.412625	-0.372795	-0.0449093	0.0578138	0.658585	2	-0.106363	0.397222	Germany	Fresenius 4008S OCM	Fresenius Medical Care AG & Co KGaA	Fresenius	PRK358	Hemodialysis Units
-0.590655	-0.440785	-0.29063	0.412625	-0.372795	-0.0449093	-0.11685	0.658585	2	-0.106363	0.63425	Germany	Dialog (+) Evo Light	B Braun Melsungen AG	B Braun	PRK358	Hemodialysis Units
-0.590655	-0.440785	-0.29063	0.412625	-0.372795	-0.0449093	-0.0817883	0.658585	2	-0.106363	0.63425	Germany	Dialog (+) Evo Light	B Braun Melsungen AG	B Braun	PRK358	Hemodialysis Units
-0.590655	-0.440785	-0.29063	0.412625	-0.372795	-0.0449093	-0.0619372	0.658585	2	-0.106363	0.63425	Germany	Dialog (+) Evo Light	B Braun Melsungen AG	B Braun	PRK358	Hemodialysis Units
-0.590655	-0.440785	-0.29063	0.412625	-0.372795	-0.0449093	-0.0385965	0.658585	2	-0.106363	0.63425	Germany	Dialog (+) Evo Light	B Braun Melsungen AG	B Braun	PRK358	Hemodialysis Units
0.218005	-0.440785	-0.29063	0.412625	-0.372795	-0.0449093	2.56765	0.658585	2	-0.106363	-0.257674	Germany	Fresenius 4008S	Fresenius Medical Care AG & Co KGaA	Fresenius	PRK358	Hemodialysis Units
0.218005	-0.440785	-0.29063	0.412625	-0.372795	-0.0449093	1.13287	0.658585	2	-0.106363	-0.257674	Germany	Fresenius 4008S	Fresenius Medical Care AG & Co KGaA	Fresenius	PRK358	Hemodialysis Units
0.218005	-0.440785	-0.29063	0.412625	-0.372795	-0.0449093	1.48748	0.658585	2	-0.106363	-0.257674	Germany	Fresenius 4008S	Fresenius Medical Care AG & Co KGaA	Fresenius	PRK358	Hemodialysis Units
0.218005	-0.440785	-0.29063	0.412625	-0.372795	-0.0449093	1.02292	0.658585	2	-0.106363	-0.257674	Germany	Fresenius 4008S	Fresenius Medical Care AG & Co KGaA	Fresenius	PRK358	Hemodialysis Units
-0.0515487	-0.440785	-0.29063	0.412625	-0.372795	-0.0449093	0.568666	0.658585	2	-0.106363	0.106984	Germany	Fresenius 4008S OCM	Fresenius Medical Care AG & Co KGaA	Fresenius	PRK358	Hemodialysis Units
-0.455879	-0.440785	-0.29063	0.412625	-0.372795	-0.0449093	-0.152206	0.658585	2	-0.106363	0.510713	Germany	Fresenius 4008S	Fresenius Medical Care AG & Co KGaA	Fresenius	PRK358	Hemodialysis Units
-0.321102	-0.440785	-0.29063	0.412625	-0.372795	-0.0449093	0.0680248	0.658585	2	-0.106363	0.35964	Germany	Fresenius 4008S OCM	Fresenius Medical Care AG & Co KGaA	Fresenius	PRK358	Hemodialysis Units
-0.321102	-0.440785	-0.29063	0.412625	-0.372795	-0.0449093	0.218399	0.658585	2	-0.106363	0.35964	Germany	Fresenius 4008S OCM	Fresenius Medical Care AG & Co KGaA	Fresenius	PRK358	Hemodialysis Units
1.02666	-0.440785	4.72854	0.412625	-0.372795	-0.0449093	0.643918	0.658585	2	-0.106363	-0.973223	Germany	Fresenius 4008S	Fresenius Medical Care AG & Co KGaA	Fresenius	PRK358	Hemodialysis Units
-0.860208	-0.440785	-0.29063	0.412625	-0.372795	-0.0449093	-0.298815	0.658585	2	-0.106363	0.911464	Germany	Fresenius 4008S Next Generation	Fresenius Medical Care AG & Co KGaA	Fresenius	PRK320	Hemodialysis Units
0.622335	-0.440785	2.21895	0.412625	-0.372795	-0.0449093	0.0954627	0.658585	2	-0.106363	-0.608565	Germany	Fresenius 4008S	Fresenius Medical Care AG & Co KGaA	Fresenius	PRK320	Hemodialysis Units
0.352781	-0.440785	2.21895	0.412625	-0.372795	-0.0449093	0.435472	0.658585	2	-0.106363	-0.424003	Germany	Fresenius 4008S	Fresenius Medical Care AG & Co KGaA	Fresenius	PRK320	Hemodialysis Units
0.352781	-0.440785	2.21895	0.412625	-0.372795	-0.0449093	1.54553	0.658585	2	-0.106363	-0.424003	Germany	Fresenius 4008S	Fresenius Medical Care AG & Co KGaA	Fresenius	PRK320	Hemodialysis Units
0.352781	-0.440785	2.21895	0.412625	-0.372795	-0.0449093	-0.0490745	0.658585	2	-0.106363	-0.424003	Germany	Fresenius 4008S	Fresenius Medical Care AG & Co KGaA	Fresenius	PRK320	Hemodialysis Units
0.352781	-0.440785	2.21895	0.412625	-0.372795	-0.0449093	0.131924	0.658585	2	-0.106363	-0.424003	Germany	Fresenius 4008S	Fresenius Medical Care AG & Co KGaA	Fresenius	PRK320	Hemodialysis Units
0.218005	-0.440785	2.21895	0.412625	-0.372795	-0.0449093	0.276756	0.658585	2	-0.106363	-0.25693	Germany	Fresenius 4008S	Fresenius Medical Care AG & Co KGaA	Fresenius	PRK320	Hemodialysis Units
0.218005	-0.440785	2.21895	0.412625	-0.372795	-0.0449093	-0.171846	0.658585	2	-0.106363	-0.25693	Germany	Fresenius 4008S	Fresenius Medical Care AG & Co KGaA	Fresenius	PRK320	Hemodialysis Units
0.218005	-0.440785	2.21895	0.412625	-0.372795	-0.0449093	0.1207	0.658585	2	-0.106363	-0.25693	Germany	Fresenius 4008S	Fresenius Medical Care AG & Co KGaA	Fresenius	PRK320	Hemodialysis Units
0.218005	-0.440785	2.21895	0.412625	-0.372795	-0.0449093	0.0224023	0.658585	2	-0.106363	-0.25693	Germany	Fresenius 4008S	Fresenius Medical Care AG & Co KGaA	Fresenius	PRK320	Hemodialysis Units
0.218005	-0.440785	2.21895	0.412625	-0.372795	-0.0449093	3.73383	0.658585	2	-0.106363	-0.25693	Germany	Fresenius 4008S	Fresenius Medical Care AG & Co KGaA	Fresenius	PRK320	Hemodialysis Units
0.218005	-0.440785	2.21895	0.412625	-0.372795	-0.0449093	0.000580804	0.658585	2	-0.106363	-0.25693	Germany	Fresenius 4008S	Fresenius Medical Care AG & Co KGaA	Fresenius	PRK320	Hemodialysis Units
-0.455879	-0.440785	-0.29063	0.412625	-0.372795	-0.0449093	-0.0167935	0.658585	2	-0.106363	0.516666	Germany	Fresenius 4008S Next Generation	Fresenius Medical Care AG & Co KGaA	Fresenius	PRK320	Hemodialysis Units
-0.590655	-0.440785	-0.29063	0.412625	-0.372795	-0.0449093	-0.0500413	0.658585	2	-0.106363	0.63425	Germany	Fresenius 4008S Next Generation	Fresenius Medical Care AG & Co KGaA	Fresenius	PRK320	Hemodialysis Units
-0.590655	-0.440785	-0.29063	0.412625	-0.372795	-0.0449093	-0.014731	0.658585	2	-0.106363	0.63425	Germany	Fresenius 4008S Next Generation	Fresenius Medical Care AG & Co KGaA	Fresenius	PRK320	Hemodialysis Units
-0.321102	-0.440785	-0.29063	0.412625	-0.372795	-0.0449093	0.838304	0.658585	2	-0.106363	0.360756	Germany	Fresenius 4008S Next Generation	Fresenius Medical Care AG & Co KGaA	Fresenius	PRK320	Hemodialysis Units
-0.321102	-0.440785	-0.29063	0.412625	-0.372795	-0.0449093	-0.106795	0.658585	2	-0.106363	0.360756	Germany	Fresenius 4008S Next Generation	Fresenius Medical Care AG & Co KGaA	Fresenius	PRK320	Hemodialysis Units
-0.321102	-0.440785	-0.29063	0.412625	-0.372795	-0.0449093	-0.0982787	0.658585	2	-0.106363	0.360756	Germany	Fresenius 4008S Next Generation	Fresenius Medical Care AG & Co KGaA	Fresenius	PRK320	Hemodialysis Units
-0.455879	-0.440785	-0.29063	0.412625	-0.372795	-0.0449093	-0.0440013	0.658585	2	-0.106363	0.516666	Germany	Fresenius 4008S Next Generation	Fresenius Medical Care AG & Co KGaA	Fresenius	PRK320	Hemodialysis Units
0.891888	-0.440785	2.21895	0.412625	-0.372795	-0.0449093	1.33594	0.658585	2	-0.106363	-0.960572	Germany	Fresenius 4008S	Fresenius Medical Care AG & Co KGaA	Fresenius	PRK311	Hemodialysis Units
0.622335	-0.440785	2.21895	0.412625	-0.372795	-0.0449093	0.593821	0.658585	2	-0.106363	-0.608565	Germany	Fresenius 4008S	Fresenius Medical Care AG & Co KGaA	Fresenius	PRK311	Hemodialysis Units
0.487558	-0.440785	2.21895	0.412625	-0.372795	-0.0449093	0.248277	0.658585	2	-0.106363	-0.52261	Germany	Fresenius 4008S	Fresenius Medical Care AG & Co KGaA	Fresenius	PRK311	Hemodialysis Units
-0.590655	-0.440785	-0.29063	0.412625	-0.372795	-0.0449093	0.478563	0.658585	2	-0.106363	0.63425	Germany	Dialog+	B Braun Melsungen AG	Dialog	PRK311	Hemodialysis Units
-0.590655	-0.440785	-0.29063	0.412625	-0.372795	-0.0449093	0.388377	0.658585	2	-0.106363	0.63425	Germany	Dialog+	B Braun Melsungen AG	Dialog	PRK311	Hemodialysis Units
-0.590655	-0.440785	-0.29063	0.412625	-0.372795	-0.0449093	-0.0980117	0.658585	2	-0.106363	0.63425	Germany	Dialog+	B Braun Melsungen AG	Dialog	PRK311	Hemodialysis Units
-0.590655	-0.440785	-0.29063	0.412625	-0.372795	-0.0449093	-0.0188099	0.658585	2	-0.106363	0.63425	Germany	Dialog+	B Braun Melsungen AG	Dialog	PRK311	Hemodialysis Units
-0.590655	-0.440785	-0.29063	0.412625	-0.372795	-0.0449093	0.291994	0.658585	2	-0.106363	0.534899	Germany	Fresenius 4008S Next Generation	Fresenius Medical Care AG & Co KGaA	Fresenius	PRK311	Hemodialysis Units
-0.590655	-0.440785	-0.29063	0.412625	-0.372795	-0.0449093	0.0462033	0.658585	2	-0.106363	0.534899	Germany	Fresenius 4008S Next Generation	Fresenius Medical Care AG & Co KGaA	Fresenius	PRK311	Hemodialysis Units
-0.590655	-0.440785	-0.29063	0.412625	-0.372795	-0.0449093	0.114347	0.658585	2	-0.106363	0.534899	Germany	Fresenius 4008S Next Generation	Fresenius Medical Care AG & Co KGaA	Fresenius	PRK311	Hemodialysis Units
-0.590655	-0.440785	-0.29063	0.412625	-0.372795	-0.0449093	0.489105	0.658585	2	-0.106363	0.534899	Germany	Fresenius 4008S Next Generation	Fresenius Medical Care AG & Co KGaA	Fresenius	PRK311	Hemodialysis Units
-0.590655	-0.440785	-0.29063	0.412625	-0.372795	-0.0449093	0.0639827	0.658585	2	-0.106363	0.534899	Germany	Fresenius 4008S Next Generation	Fresenius Medical Care AG & Co KGaA	Fresenius	PRK311	Hemodialysis Units
-1.26454	-0.440785	-0.29063	0.412625	-0.372795	-0.0449093	-0.330369	0.658585	2	-0.106363	1.33864	Japan	Surdial 55 Plus	Nipro Corp	Nipro	PRK311	Hemodialysis Units
-1.26454	-0.440785	-0.29063	0.412625	-0.372795	-0.0449093	-0.330369	0.658585	2	-0.106363	1.32152	Germany	Fresenius 4008S Next Generation	Fresenius Medical Care AG & Co KGaA	Fresenius	PRK311	Hemodialysis Units
-0.590655	-0.440785	-0.29063	0.412625	-0.372795	-0.0449093	-0.322386	0.658585	2	-0.106363	0.63425	Germany	Dialog (+) Evo Light	B Braun Melsungen AG	B Braun	PRK340	Hemodialysis Units
-0.590655	-0.440785	-0.29063	0.412625	-0.372795	-0.0449093	-0.314081	0.658585	2	-0.106363	0.63425	Germany	Fresenius 4008S	Fresenius Medical Care AG & Co KGaA	Fresenius	PRK340	Hemodialysis Units
-0.590655	-0.440785	-0.29063	0.412625	-0.372795	-0.0449093	-0.327754	0.658585	2	-0.106363	0.63425	Germany	Fresenius 4008S	Fresenius Medical Care AG & Co KGaA	Fresenius	PRK340	Hemodialysis Units
-0.590655	-0.440785	-0.29063	0.412625	-0.372795	-0.0449093	-0.159333	0.658585	2	-0.106363	0.63425	Germany	Fresenius 4008S	Fresenius Medical Care AG & Co KGaA	Fresenius	PRK340	Hemodialysis Units
-0.590655	-0.440785	-0.29063	0.412625	-0.372795	-0.0449093	-0.292545	0.658585	2	-0.106363	0.63425	Germany	Fresenius 4008S	Fresenius Medical Care AG & Co KGaA	Fresenius	PRK340	Hemodialysis Units
-0.590655	-0.440785	-0.29063	0.412625	-0.372795	-0.0449093	-0.154536	0.658585	2	-0.106363	0.63425	Germany	Fresenius 4008S	Fresenius Medical Care AG & Co KGaA	Fresenius	PRK340	Hemodialysis Units
0.218005	-0.440785	-0.29063	0.412625	-0.372795	-0.0449093	-0.259288	0.658585	2	-0.106363	-0.262512	Germany	Fresenius 4008S	Fresenius Medical Care AG & Co KGaA	Fresenius	PRK340	Hemodialysis Units
0.218005	-0.440785	-0.29063	0.412625	-0.372795	-0.0449093	0.658465	0.658585	2	-0.106363	-0.262512	Germany	Fresenius 4008S	Fresenius Medical Care AG & Co KGaA	Fresenius	PRK340	Hemodialysis Units
0.218005	-0.440785	-0.29063	0.412625	-0.372795	-0.0449093	0.117956	0.658585	2	-0.106363	-0.262512	Germany	Fresenius 4008S	Fresenius Medical Care AG & Co KGaA	Fresenius	PRK340	Hemodialysis Units
0.218005	-0.440785	-0.29063	0.412625	-0.372795	-0.0449093	0.79885	0.658585	2	-0.106363	-0.254326	Germany	Fresenius 4008S	Fresenius Medical Care AG & Co KGaA	Fresenius	PRK340	Hemodialysis Units
0.218005	-0.440785	-0.29063	0.412625	-0.372795	-0.0449093	-0.066633	0.658585	2	-0.106363	-0.254326	Germany	Fresenius 4008S	Fresenius Medical Care AG & Co KGaA	Fresenius	PRK340	Hemodialysis Units
0.218005	-0.440785	-0.29063	0.412625	-0.372795	-0.0449093	-0.0267098	0.658585	2	-0.106363	-0.254326	Germany	Fresenius 4008S	Fresenius Medical Care AG & Co KGaA	Fresenius	PRK340	Hemodialysis Units
0.487558	-0.440785	4.72854	0.412625	-0.372795	-0.0449093	0.643715	0.658585	2	-0.106363	-0.52261	Germany	Fresenius 4008S	Fresenius Medical Care AG & Co KGaA	Fresenius	PRK340	Hemodialysis Units
-0.455879	-0.440785	-0.29063	0.412625	-0.372795	-0.0449093	-0.139003	0.658585	2	-0.106363	0.520759	Germany	Fresenius 4008S Next Generation	Fresenius Medical Care AG & Co KGaA	Fresenius	PRK340	Hemodialysis Units
-0.455879	-0.440785	-0.29063	0.412625	-0.372795	-0.0449093	0.074562	0.658585	2	-0.106363	0.520759	Germany	Fresenius 4008S Next Generation	Fresenius Medical Care AG & Co KGaA	Fresenius	PRK340	Hemodialysis Units
-0.321102	-0.440785	-0.29063	0.412625	-0.372795	-0.0449093	0.311412	0.658585	2	-0.106363	0.360384	Germany	Fresenius 4008S OCM	Fresenius Medical Care AG & Co KGaA	Fresenius	PRK340	Hemodialysis Units
-0.321102	-0.440785	-0.29063	0.412625	-0.372795	-0.0449093	-0.176569	0.658585	2	-0.106363	0.360384	Germany	Fresenius 4008S OCM	Fresenius Medical Care AG & Co KGaA	Fresenius	PRK340	Hemodialysis Units
0.218005	-0.440785	-0.29063	0.412625	-0.372795	-0.0449093	0.746589	0.658585	2	-0.106363	-0.270326	Sweden	Gambro AK 200 Ultra S	Gambro AB	Gambro	PRK340	Hemodialysis Units
0.218005	-0.440785	-0.29063	0.412625	-0.372795	-0.0449093	0.543134	0.658585	2	-0.106363	-0.270326	Sweden	Gambro AK 200 Ultra S	Gambro AB	Gambro	PRK340	Hemodialysis Units
0.622335	-0.440785	-0.29063	0.412625	-0.372795	-0.0449093	0.191882	0.658585	2	-0.106363	-0.60596	Germany	Fresenius 4008S OCM	Fresenius Medical Care AG & Co KGaA	Fresenius	PRK340	Hemodialysis Units
-1.39932	-0.440785	-0.29063	0.412625	-0.372795	-0.0449093	-0.330369	0.658585	2	-0.106363	1.34273	Germany	Fresenius 4008S New Generation	Fresenius Medical Care AG & Co KGaA	Fresenius	PRK340	Hemodialysis Units
-1.26454	-0.440785	-0.29063	0.412625	-0.372795	-0.0449093	-0.330369	0.658585	2	-0.106363	1.30738	Germany	Fresenius 4008S NG	Fresenius Medical Care AG & Co KGaA	Fresenius	PRK340	Hemodialysis Units
-1.26454	-0.440785	-0.29063	0.412625	-0.372795	-0.0449093	-0.330369	0.658585	2	-0.106363	1.30738	Germany	Fresenius 4008S NG	Fresenius Medical Care AG & Co KGaA	Fresenius	PRK340	Hemodialysis Units
-1.26454	-0.440785	-0.29063	0.412625	-0.372795	-0.0449093	-0.26461	0.658585	2	-0.106363	1.30738	Germany	Fresenius 4008S NG	Fresenius Medical Care AG & Co KGaA	Fresenius	PRK340	Hemodialysis Units
-1.26454	-0.440785	-0.29063	0.412625	-0.372795	-0.0449093	-0.0857475	0.658585	2	-0.106363	1.30738	Germany	Fresenius 4008S NG	Fresenius Medical Care AG & Co KGaA	Fresenius	PRK340	Hemodialysis Units
-0.994985	-0.440785	-0.29063	0.412625	-0.372795	-0.0449093	-0.328297	0.658585	2	-0.106363	0.94086	Germany	Fresenius 4008S OCM	Fresenius Medical Care AG & Co KGaA	Fresenius	PRK350	Hemodialysis Units
-0.994985	-0.440785	-0.29063	0.412625	-0.372795	-0.0449093	-0.325535	0.658585	2	-0.106363	0.94086	Germany	Fresenius 4008S OCM	Fresenius Medical Care AG & Co KGaA	Fresenius	PRK350	Hemodialysis Units
-1.12976	-0.440785	-0.29063	0.412625	-0.372795	-0.0449093	-0.329816	0.658585	2	-0.106363	1.12393	Japan	Surdial 55 Plus	Nipro Corp	Surdial	PRK350	Hemodialysis Units
-1.12976	-0.440785	-0.29063	0.412625	-0.372795	-0.0449093	-0.236223	0.658585	2	-0.106363	1.19017	Germany	Fresenius 4008 S Ng	Fresenius Medical Care AG & Co. KGaA	Fresenius	PRK350	Hemodialysis Units
-1.12976	-0.440785	-0.29063	0.412625	-0.372795	-0.0449093	-0.328988	0.658585	2	-0.106363	1.19017	Germany	Fresenius 4008 S Ng	Fresenius Medical Care AG & Co. KGaA	Fresenius	PRK350	Hemodialysis Units
-0.186325	-0.440785	-0.29063	0.412625	-0.372795	-0.0449093	1.25984	0.658585	2	-0.106363	0.237963	Germany	Fresenius 4008S	Fresenius Medical Care AG & Co KGaA	Fresenius	PRK350	Hemodialysis Units
-0.186325	-0.440785	-0.29063	0.412625	-0.372795	-0.0449093	4.29989	0.658585	2	-0.106363	0.237963	Germany	Fresenius 4008S	Fresenius Medical Care AG & Co KGaA	Fresenius	PRK350	Hemodialysis Units
-0.186325	-0.440785	-0.29063	0.412625	-0.372795	-0.0449093	2.28596	0.658585	2	-0.106363	0.237963	Germany	Fresenius 4008S	Fresenius Medical Care AG & Co KGaA	Fresenius	PRK350	Hemodialysis Units
-0.860208	-0.440785	-0.29063	0.412625	-0.372795	-0.0449093	-0.260899	0.658585	2	-0.106363	0.859743	Germany	Fresenius 4008S NG	Fresenius Medical Care AG & Co KGaA	Fresenius	PRK350	Hemodialysis Units
-0.590655	-0.440785	-0.29063	0.412625	-0.372795	-0.0449093	-0.145347	0.658585	2	-0.106363	0.63425	Germany	Dialog (+) Evo Light	B Braun Melsungen AG	B Braun	PRK350	Hemodialysis Units
-0.590655	-0.440785	-0.29063	0.412625	-0.372795	-0.0449093	-0.162878	0.658585	2	-0.106363	0.63425	Germany	Dialog (+) Evo Light	B Braun Melsungen AG	B Braun	PRK350	Hemodialysis Units
-0.590655	-0.440785	-0.29063	0.412625	-0.372795	-0.0449093	0.104394	0.658585	2	-0.106363	0.537132	Germany	Fresenius 4008S	Fresenius Medical Care AG & Co KGaA	Fresenius	PRK350	Hemodialysis Units
-0.590655	-0.440785	-0.29063	0.412625	-0.372795	-0.0449093	-0.240726	0.658585	2	-0.106363	0.537132	Germany	Fresenius 4008S	Fresenius Medical Care AG & Co KGaA	Fresenius	PRK350	Hemodialysis Units
0.218005	-0.440785	-0.29063	0.412625	-0.372795	-0.0449093	0.596325	0.658585	2	-0.106363	-0.257302	Germany	Fresenius 4008S	Fresenius Medical Care AG & Co KGaA	Fresenius	PRK350	Hemodialysis Units
0.218005	-0.440785	2.21895	0.412625	-0.372795	-0.0449093	0.0771216	0.658585	2	-0.106363	-0.257302	Germany	Fresenius 4008S	Fresenius Medical Care AG & Co KGaA	Fresenius	PRK350	Hemodialysis Units
-1.12976	-0.440785	-0.29063	0.412625	-0.372795	-0.0449093	-0.330369	0.658585	2	-0.106363	1.19649	Germany	Fresenius 4008S	Fresenius Medical Care AG	Fresenius	PRK360	Hemodialysis Units
-1.12976	-0.440785	-0.29063	0.412625	-0.372795	-0.0449093	-0.330369	0.658585	2	-0.106363	1.19649	Germany	Fresenius 4008S	Fresenius Medical Care AG	Fresenius	PRK360	Hemodialysis Units
-1.26454	-0.440785	-0.29063	0.412625	-0.372795	-0.0449093	-0.306503	0.658585	2	-0.106363	1.27501	Germany	Fresenius 4008S New Generation	Fresenius Medical Care AG & Co KGaA	Fresenius	PRK360	Hemodialysis Units
-1.26454	-0.440785	-0.29063	0.412625	-0.372795	-0.0449093	-0.26228	0.658585	2	-0.106363	1.27501	Germany	Fresenius 4008S New Generation	Fresenius Medical Care AG & Co KGaA	Fresenius	PRK360	Hemodialysis Units
-1.26454	-0.440785	-0.29063	0.412625	-0.372795	-0.0449093	-0.286542	0.658585	2	-0.106363	1.27501	Germany	Fresenius 4008S New Generation	Fresenius Medical Care AG & Co KGaA	Fresenius	PRK360	Hemodialysis Units
-1.26454	-0.440785	-0.29063	0.412625	-0.372795	-0.0449093	-0.297452	0.658585	2	-0.106363	1.27501	Germany	Fresenius 4008S New Generation	Fresenius Medical Care AG & Co KGaA	Fresenius	PRK360	Hemodialysis Units
-1.26454	-0.440785	-0.29063	0.412625	-0.372795	-0.0449093	-0.261157	0.658585	2	-0.106363	1.27501	Germany	Fresenius 4008S New Generation	Fresenius Medical Care AG & Co KGaA	Fresenius	PRK360	Hemodialysis Units
-0.590655	-0.440785	-0.29063	0.412625	-0.372795	-0.0449093	0.116106	0.658585	2	-0.106363	0.63425	Germany	Fresenius 4008S	Fresenius Medical Care AG & Co KGaA	Fresenius	PRK360	Hemodialysis Units
-0.590655	-0.440785	-0.29063	0.412625	-0.372795	-0.0449093	0.00639986	0.658585	2	-0.106363	0.63425	Germany	Fresenius 4008S	Fresenius Medical Care AG & Co KGaA	Fresenius	PRK360	Hemodialysis Units
-0.590655	-0.440785	-0.29063	0.412625	-0.372795	-0.0449093	-0.0475645	0.658585	2	-0.106363	0.63425	Germany	Fresenius 4008S	Fresenius Medical Care AG & Co KGaA	Fresenius	PRK360	Hemodialysis Units
0.083228	-0.440785	-0.29063	0.412625	-0.372795	-0.0449093	0.133673	0.658585	2	-0.106363	-0.125207	Germany	Fresenius 4008S	Fresenius Medical Care AG & Co KGaA	Fresenius	PRK360	Hemodialysis Units
0.083228	-0.440785	-0.29063	0.412625	-0.372795	-0.0449093	0.309589	0.658585	2	-0.106363	-0.125207	Germany	Fresenius 4008S	Fresenius Medical Care AG & Co KGaA	Fresenius	PRK360	Hemodialysis Units
-0.590655	-0.440785	-0.29063	0.412625	-0.372795	-0.0449093	-0.063705	0.658585	2	-0.106363	0.63425	Germany	Fresenius 4008S	Fresenius Medical Care AG & Co KGaA	Fresenius	PRK360	Hemodialysis Units
-0.321102	-0.440785	-0.29063	0.412625	-0.372795	-0.0449093	0.856958	0.658585	2	-0.106363	0.362245	Germany	Fresenius 4008S	Fresenius Medical Care AG & Co KGaA	Fresenius	PRK360	Hemodialysis Units
-0.860208	-0.440785	-0.29063	0.412625	-0.372795	-0.0449093	-0.290888	0.658585	2	-0.106363	0.899185	Germany	Fresenius 4008S	Fresenius Medical Care AG & Co KGaA	Fresenius	PRK360	Hemodialysis Units
0.218005	-0.440785	-0.29063	0.412625	-0.372795	-0.0449093	0.0837509	0.658585	2	-0.106363	-0.267349	Germany	Fresenius 4008S	Fresenius Medical Care AG & Co KGaA	Fresenius	PRK360	Hemodialysis Units
0.218005	-0.440785	-0.29063	0.412625	-0.372795	-0.0449093	0.669174	0.658585	2	-0.106363	-0.267349	Germany	Fresenius 4008S	Fresenius Medical Care AG & Co KGaA	Fresenius	PRK360	Hemodialysis Units
0.218005	-0.440785	-0.29063	0.412625	-0.372795	-0.0449093	0.620246	0.658585	2	-0.106363	-0.267349	Germany	Fresenius 4008S	Fresenius Medical Care AG & Co KGaA	Fresenius	PRK360	Hemodialysis Units
0.218005	-0.440785	-0.29063	0.412625	-0.372795	-0.0449093	0.300695	0.658585	2	-0.106363	-0.267349	Germany	Fresenius 4008S	Fresenius Medical Care AG & Co KGaA	Fresenius	PRK360	Hemodialysis Units
0.218005	-0.440785	-0.29063	0.412625	-0.372795	-0.0449093	-0.0708683	0.658585	2	-0.106363	-0.267349	Germany	Fresenius 4008S	Fresenius Medical Care AG & Co KGaA	Fresenius	PRK360	Hemodialysis Units
-0.321102	-0.440785	-0.29063	0.412625	-0.372795	-0.0449093	-0.0790629	0.658585	2	-0.106363	0.35964	Germany	Fresenius 4008S OCM	Fresenius Medical Care AG & Co KGaA	Fresenius	PRK360	Hemodialysis Units
-0.590655	-0.440785	-0.29063	0.412625	-0.372795	-0.0449093	0.0355964	0.658585	2	-0.106363	0.526341	Germany	Fresenius 4008S OCM	Fresenius Medical Care AG & Co KGaA	Fresenius	PRK360	Hemodialysis Units
-0.590655	-0.440785	-0.29063	0.412625	-0.372795	-0.0449093	0.462339	0.658585	2	-0.106363	0.526341	Germany	Fresenius 4008S OCM	Fresenius Medical Care AG & Co KGaA	Fresenius	PRK360	Hemodialysis Units
-0.590655	-0.440785	-0.29063	0.412625	-0.372795	-0.0449093	-0.0925701	0.658585	2	-0.106363	0.526341	Germany	Fresenius 4008S OCM	Fresenius Medical Care AG & Co KGaA	Fresenius	PRK360	Hemodialysis Units
-1.26454	-0.440785	-0.29063	0.412625	-0.372795	-0.0449093	-0.330369	-1.51823	2	-0.106363	1.31557	Singapore	Homechoice Claria APD Cycler	Baxter Healthcare SA	Homechoice	PRK300	Peritoneal Dialysis Units
-1.26454	-0.440785	-0.29063	0.412625	-0.372795	-0.0449093	-0.330369	-1.51823	2	-0.106363	1.31557	Singapore	Homechoice Claria APD Cycler	Baxter Healthcare SA	Homechoice	PRK300	Peritoneal Dialysis Units
-1.12976	-0.440785	-0.29063	0.412625	-0.372795	-0.0449093	-0.330369	-1.51823	2	-0.106363	1.19389	Switzerland	Homechoice Claria APD Cycler	Baxter Healthcare SA	Homechoice	PRK300	Peritoneal Dialysis Units
-1.12976	-0.440785	-0.29063	0.412625	-0.372795	-0.0449093	-0.330369	-1.51823	2	-0.106363	1.19389	Switzerland	Homechoice Claria APD Cycler	Baxter Healthcare SA	Homechoice	PRK300	Peritoneal Dialysis Units
0.757111	-0.440785	-0.29063	0.412625	-0.372795	-0.0449093	-0.212579	-1.51823	2	0.00830919	-0.700102	USA	Baxter Home Choice Pro	Baxter Healthcare Corp	Baxter	PRK300	Peritoneal Dialysis Units
0.757111	-0.440785	-0.29063	0.412625	-0.372795	-0.0449093	2.15501	-1.51823	2	-0.00305849	-0.700102	USA	Baxter Home Choice Pro	Baxter Healthcare Corp	Baxter	PRK300	Peritoneal Dialysis Units
0.757111	-0.440785	-0.29063	0.412625	-0.372795	-0.0449093	-0.196024	-1.51823	2	-0.0366959	-0.700102	USA	Baxter Home Choice Pro	Baxter Healthcare Corp	Baxter	PRK300	Peritoneal Dialysis Units
-1.12976	-0.440785	-0.29063	0.412625	-0.372795	-0.0449093	-0.330369	-1.51823	2	-0.106363	1.15631	Switzerland	Homechoice Claria APD Cycler	Baxter Healthcare SA	Homechoice	PRK340	Peritoneal Dialysis Units
0.218005	-0.440785	-0.29063	0.412625	-0.372795	-0.0449093	-0.167398	-1.51823	2	-0.106363	-0.268465	USA	Baxter Home Choice Pro	Baxter Healthcare Corp	Baxter	PRK340	Peritoneal Dialysis Units
-1.26454	-0.440785	-0.29063	0.412625	-0.372795	-0.0449093	-0.330369	-1.51823	2	-0.106363	1.33491	Switzerland	Homechoice Claria APD Cycler	Baxter Healthcare SA	Homechoice	PRK360	Peritoneal Dialysis Units
0.218005	-0.440785	-0.29063	0.412625	-0.372795	-0.0449093	3.13216	-1.51823	2	1.94565	-0.282977	USA	Legend Ehs	Medtronic Inc	Legend	PRK300	Drills, Bone
0.352781	-0.440785	-0.29063	0.412625	-0.372795	-0.0449093	-0.0255865	-1.51823	2	0.757232	-0.294512	USA	Legend Ehs	Medtronic Inc	Legend	PRK300	Drills, Bone
0.352781	-0.440785	-0.29063	0.412625	-0.372795	-0.0449093	-0.281984	-1.51823	2	-0.0524625	-0.294512	USA	Medtronic 30-55607	Medtronic Inc	Medtronic	PRK300	Drills, Bone
0.218005	-0.440785	-0.29063	0.412625	-0.372795	-0.0449093	-0.180878	-1.51823	2	-0.0431119	-0.184743	USA	Anspach Emax 2 Plus	The Anspach Effort Inc	Anspach	PRK300	Drills, Bone
-0.0515487	-0.440785	-0.29063	0.412625	-0.372795	-0.0449093	0.220066	-1.51823	2	-0.106363	-0.0120883	USA	Legend Ehs	Medtronic Inc	Legend	PRK300	Drills, Bone
0.218005	-0.440785	-0.29063	0.412625	-0.372795	-0.0449093	-0.330369	-1.51823	2	-0.106363	-0.282605	Germany	Kerrison	Aesculap AG	Kerrison	PRK300	Drills, Bone
0.083228	-0.440785	2.21895	0.412625	-0.372795	-0.0449093	-0.328067	-1.51823	2	-0.106363	-0.0284607	USA	GPC	Gpc Medical Ltd	GPC	PRK300	Drills, Bone
-0.455879	-0.440785	2.21895	0.412625	-0.372795	-0.0449093	-0.240597	-1.51823	2	-0.106363	0.398338	USA	GPC	Gpc Medical Ltd	GPC	PRK300	Drills, Bone
0.352781	-0.440785	-0.29063	0.412625	-0.372795	-0.0449093	-0.330369	-1.51823	2	-0.106363	-0.300838	USA	GPC	Gpc Medical Ltd	GPC	PRK300	Drills, Bone
0.352781	-0.440785	-0.29063	0.412625	-0.372795	-0.0449093	-0.330369	-1.51823	2	-0.106363	-0.300838	USA	GPC	Gpc Medical Ltd	GPC	PRK300	Drills, Bone
-0.455879	-0.440785	2.21895	0.412625	-0.372795	-0.0449093	-0.330369	-1.51823	2	-0.106363	0.398338	India	GPC	Gpc Medical Ltd	GPC	PRK300	Drills, Bone
-0.455879	-0.440785	4.72854	0.412625	-0.372795	-0.0449093	-0.281082	-1.51823	2	-0.106363	0.398338	India	GPC	Gpc Medical Ltd	GPC	PRK300	Drills, Bone
-0.455879	-0.440785	4.72854	0.412625	-0.372795	-0.0449093	-0.1237	-1.51823	2	-0.106363	0.398338	India	GPC	Gpc Medical Ltd	GPC	PRK300	Drills, Bone
-0.455879	-0.440785	-0.29063	0.412625	-0.372795	-0.0449093	-0.216916	-1.51823	2	-0.106363	0.398338	USA	GPC	Gpc Medical Ltd	GPC	PRK300	Drills, Bone
-0.455879	-0.440785	-0.29063	0.412625	-0.372795	-0.0449093	-0.330369	-1.51823	2	-0.106363	0.398338	USA	GPC	Gpc Medical Ltd	GPC	PRK300	Drills, Bone
-0.455879	-0.440785	4.72854	0.412625	-0.372795	-0.0449093	-0.327579	-1.51823	2	-0.106363	0.398338	USA	GPC	Gpc Medical Ltd	GPC	PRK300	Drills, Bone
-0.455879	-0.440785	-0.29063	0.412625	-0.372795	-0.0449093	-0.330369	-1.51823	2	-0.106363	0.398338	USA	GPC	Gpc Medical Ltd	GPC	PRK300	Drills, Bone
0.891888	-0.440785	-0.29063	0.412625	-0.372795	-0.0449093	-0.329448	-1.51823	2	-0.106363	-0.851919	USA	Powerpro 5200	Hall Surgical	Powerpro	PRK358	Drills, Bone
0.891888	-0.440785	-0.29063	0.412625	-0.372795	-0.0449093	2.77098	-1.51823	2	-0.106363	-0.851919	USA	Powerpro 5200	Hall Surgical	Powerpro	PRK358	Drills, Bone
-0.186325	-0.440785	-0.29063	0.412625	-0.372795	-0.0449093	0.363333	-1.51823	2	-0.106363	0.248754	USA	GPC	Gpc Medical Ltd	GPC	PRK358	Drills, Bone
0.487558	-0.440785	-0.29063	0.412625	-0.372795	-0.0449093	-0.1582	-1.51823	2	-0.106363	-0.464934	USA	Aesculap Ga 437	Aesculap AG	Aesculap	PRK320	Drills, Bone
1.02666	-0.440785	-0.29063	0.412625	-0.372795	-0.0449093	2.50267	-1.51823	2	-0.106363	-0.973595	Switzerland	Compact Air Drive Ii	Synthes Inc	Synthes	PRK320	Drills, Bone
1.02666	-0.440785	-0.29063	0.412625	-0.372795	-0.0449093	2.1378	-1.51823	2	-0.106363	-0.973595	Switzerland	Compact Air Drive Ii	Synthes Inc	Synthes	PRK320	Drills, Bone
-0.0515487	-0.440785	-0.29063	0.412625	-0.372795	-0.0449093	0.921409	-1.51823	2	-0.106363	-0.00539052	USA	Stryker System 6	Stryker Corp	Stryker	PRK360	Drills, Bone
-0.455879	-0.440785	-0.29063	-1.1749	-0.372795	-0.0449093	-0.285022	-1.51823	1	-0.104021	0.397222	France	Compact Touch	Quantel Medical SA	Compact	PRK312	Scanning System
-0.455879	-0.440785	-0.29063	-1.1749	-0.372795	-0.0449093	-0.328665	-1.51823	1	-0.105861	0.39685	France	Compact Touch	Quantel Medical SA	Compact	PRK310	Scanning System
-0.725432	-0.440785	-0.29063	-1.1749	-0.372795	-0.0449093	-0.330369	-1.51823	1	-0.106363	0.77602	France	Compact Touch	Quantel Medical SA	Compact	PRK330	Scanning System
-0.0515487	-0.440785	-0.29063	-1.1749	-0.372795	-0.0449093	3.12783	-1.51823	1	-0.106363	0.0768436	USA	Accutome B-Scan	Accutome Inc	Accutome	PRK300	Scanning System
1.56577	-0.440785	-0.29063	-1.1749	-0.372795	-0.0449093	-0.273053	-1.51823	1	0.00374103	-1.64635	USA	Sonomed A-1500	Sonomed Inc	Sonomed	PRK300	Scanning System
-0.0515487	-0.440785	-0.29063	-1.1749	-0.372795	-0.0449093	-0.330369	-1.51823	1	-0.106363	0.0768436	USA	Accutome A-Scan Synergy	Accutome Inc	Accutome	PRK300	Scanning System
-0.590655	-0.440785	-0.29063	-1.1749	-0.372795	-0.0449093	-0.324881	-1.51823	1	-0.106363	0.52969	France	Compact Touch	Quantel Medical SA	Compact	PRK300	Scanning System
0.487558	-0.440785	2.21895	-1.1749	-0.372795	-0.0449093	2.26247	-1.51823	1	0.706051	-0.449306	USA	Pacscan 300a	Sonomed Inc	Sonomed	PRK300	Scanning System
0.218005	-0.440785	-0.29063	-1.1749	-0.372795	-0.0449093	-0.182112	-1.51823	1	0.500366	-0.212278	USA	Pacscan 300a	Sonomed Inc	Sonomed	PRK300	Scanning System
0.757111	2.26841	4.72854	-1.1749	-0.372795	-0.0449093	-0.0608507	-1.51823	1	0.272559	-0.832197	USA	Sonomed B-5500	Sonomed Inc	Sonomed	PRK300	Scanning System
1.29622	-0.440785	2.21895	-1.1749	-0.372795	-0.0449093	-0.330369	-1.51823	1	-0.106363	-1.36244	Japan	Nidek Us-800	Nidek Co Ltd	Nidek	PRK358	Scanning System
0.622335	-0.440785	-0.29063	-1.1749	-0.372795	-0.0449093	-0.327993	-1.51823	1	-0.106363	-0.564285	China	Meda Odm-2100	Meda	Meda	PRK320	Scanning System
-0.321102	-0.440785	-0.29063	-1.1749	-0.372795	-0.0449093	7.38112	-1.51823	1	-0.106363	0.380477	France	Compact Touch	Quantel Medical SA	Compact	PRK320	Scanning System
-0.455879	-0.440785	-0.29063	-1.1749	-0.372795	-0.0449093	-0.327146	-1.51823	1	-0.106363	0.399082	Japan	Nidek Us-1800 Echoscan	Nidek Co Ltd	Nidek	PRK311	Scanning System
0.218005	-0.440785	-0.29063	-1.1749	-0.372795	-0.0449093	-0.209052	-1.51823	1	-0.106363	-0.156463	USA	Pacscan 300a	Sonomed Inc	Sonomed	PRK340	Scanning System
0.757111	-0.440785	2.21895	-1.1749	-0.372795	-0.0449093	0.361482	-1.51823	1	-0.106363	-0.69973	France	Compcat Ii	Quantel Medical SA	Compcat	PRK340	Scanning System
1.83532	-0.440785	4.72854	-1.1749	-0.372795	-0.0449093	-0.328251	-1.51823	1	-0.106363	-1.80896	USA	Allergan Humphrey A/B Scan 835	Allergan Humphrey	Allergan Humphrey	PRK340	Scanning System
0.487558	-0.440785	2.21895	-1.1749	-0.372795	-0.0449093	0.521423	-1.51823	1	-0.106363	-0.559076	France	Compcat Ii	Quantel Medical SA	Compcat	PRK360	Scanning System
-0.455879	-0.440785	-0.29063	-1.1749	-0.372795	-0.0449093	-0.328454	-1.51823	2	-0.104021	0.402431	China	Biocare Fm-200	Shenzhen Biocare Electronics Co Ltd	Biocare	PRK312	Fetal Heart
1.29622	-0.440785	-0.29063	-1.1749	-0.372795	-0.0449093	-0.324108	-1.51823	2	-0.0764711	-1.30179	UK	Sonicaid 421	Oxford Instruments Medical	Sonicaid	PRK310	Fetal Heart
1.9701	-0.440785	-0.29063	-1.1749	-0.372795	-0.0449093	-0.313749	-1.51823	2	-0.0967584	-1.92096	UK	Dopplex Fd	Huntleigh Healthcare Ltd	Dopplex	PRK310	Fetal Heart
0.218005	-0.440785	-0.29063	-1.1749	-0.372795	-0.0449093	-0.0955165	-1.51823	2	0.0315974	-0.199627	Japan	Hadeco Es-102ex	Hayashi Denki Co Ltd	Hadeco	PRK310	Fetal Heart
-0.590655	-0.440785	-0.29063	-1.1749	-0.372795	-0.0449093	-0.329264	-1.51823	2	-0.102467	0.610807	South Korea	Hi-Bebe S, Bt-220	Bistos Co Ltd	Hi-Bebe S	PRK326	Fetal Heart
0.083228	-0.440785	-0.29063	-1.1749	-0.372795	-0.0449093	0.00279057	-1.51823	2	-0.0950225	-0.0373911	China	Sonotrax Basic A	Edan Instruments Inc	Sonotrax	PRK326	Fetal Heart
-0.186325	-0.440785	-0.29063	-1.1749	-0.372795	-0.0449093	-0.218803	-1.51823	2	0.00373049	0.232382	China	Sonotrax Basic A	Edan Instruments Inc	Sonotrax	PRK333	Fetal Heart
-0.590655	-0.440785	-0.29063	-1.1749	-0.372795	-0.0449093	-0.329835	-1.51823	2	-0.106032	0.53676	UK	SonicaidOne	Huntleigh Healthcare Ltd	Sonicaid	PRK333	Fetal Heart
-0.590655	-0.440785	-0.29063	-1.1749	-0.372795	-0.0449093	-0.330369	-1.51823	2	-0.106363	0.53676	UK	SonicaidOne	Huntleigh Healthcare Ltd	Sonicaid	PRK333	Fetal Heart
1.02666	-0.440785	-0.29063	-1.1749	-0.372795	-0.0449093	-0.323463	-1.51823	2	-0.0778416	-1.09043	UK	Sonicaid 121	Oxford Instruments Medical	Sonicaid	PRK333	Fetal Heart
0.083228	-0.440785	-0.29063	-1.1749	-0.372795	-0.0449093	-0.330369	-1.51823	2	-0.105533	-0.0571125	UK	SonicaidOne	Huntleigh Healthcare Ltd	Sonicaid	PRK319	Fetal Heart
0.083228	-0.440785	-0.29063	-1.1749	-0.372795	-0.0449093	-0.32931	-1.51823	2	-0.0993353	-0.0571125	UK	SonicaidOne	Huntleigh Healthcare Ltd	Sonicaid	PRK319	Fetal Heart
0.083228	-0.440785	-0.29063	-1.1749	-0.372795	-0.0449093	-0.330369	-1.51823	2	-0.106363	-0.0571125	UK	SonicaidOne	Huntleigh Healthcare Ltd	Sonicaid	PRK319	Fetal Heart
-0.455879	-0.440785	-0.29063	-1.1749	-0.372795	-0.0449093	-0.329218	-1.51823	2	-0.106363	0.518155	UK	Sonicaid Fd3	Huntleigh Healthcare Ltd	Sonicaid	PRK330	Fetal Heart
-0.455879	-0.440785	-0.29063	-1.1749	-0.372795	-0.0449093	-0.330369	-1.51823	2	-0.106363	0.518155	UK	Sonicaid Fd3	Huntleigh Healthcare Ltd	Sonicaid	PRK330	Fetal Heart
-0.186325	-0.440785	-0.29063	-1.1749	-0.372795	-0.0449093	-0.329908	-1.51823	2	-0.104021	0.20373	South Korea	Bistos Bt200	Bistos Co Ltd	Bistos	PRK330	Fetal Heart
2.23965	-0.440785	2.21895	-1.1749	-0.372795	-0.0449093	-0.201862	-1.51823	2	0.52735	-2.31762	UK	Sonicaid D206	Oxford Instruments Medical	Sonicaid	PRK330	Fetal Heart
-0.994985	-0.440785	-0.29063	-1.1749	-0.372795	-0.0449093	-0.330369	-1.51823	2	-0.106363	1.04468	Japan	Sonicaid One	Huntleigh Healthcare Ltd	Huntleigh	PRK342	Fetal Heart
-0.321102	-0.440785	-0.29063	-1.1749	-0.372795	-0.0449093	-0.330369	-1.51823	2	-0.106363	0.28708	China	Sonotrax Basic A	Edan Instruments Inc	Sonotrax	PRK342	Fetal Heart
-1.12976	-0.440785	-0.29063	-1.1749	-0.372795	-0.0449093	-0.330369	-1.51823	2	-0.106363	1.20319	China	Biocare Fm-200	Shenzhen Biocare Electronics Co Ltd	Biocare	PRK300	Fetal Heart
-1.12976	-0.440785	-0.29063	-1.1749	-0.372795	-0.0449093	-0.330369	-1.51823	2	-0.106363	1.20319	China	Biocare Fm-200	Shenzhen Biocare Electronics Co Ltd	Biocare	PRK300	Fetal Heart
-1.12976	-0.440785	-0.29063	-1.1749	-0.372795	-0.0449093	-0.330369	-1.51823	2	-0.106363	1.20319	China	Biocare Fm-200	Shenzhen Biocare Electronics Co Ltd	Biocare	PRK300	Fetal Heart
-1.12976	-0.440785	-0.29063	-1.1749	-0.372795	-0.0449093	-0.323233	-1.51823	2	-0.106363	1.20319	China	Biocare Fm-200	Shenzhen Biocare Electronics Co Ltd	Biocare	PRK300	Fetal Heart
-1.12976	-0.440785	-0.29063	-1.1749	-0.372795	-0.0449093	-0.330369	-1.51823	2	-0.106363	1.20319	China	Biocare Fm-200	Shenzhen Biocare Electronics Co Ltd	Biocare	PRK300	Fetal Heart
-1.12976	-0.440785	-0.29063	-1.1749	-0.372795	-0.0449093	-0.330369	-1.51823	2	-0.106363	1.20319	China	Biocare Fm-200	Shenzhen Biocare Electronics Co Ltd	Biocare	PRK300	Fetal Heart
-1.12976	-0.440785	-0.29063	-1.1749	-0.372795	-0.0449093	-0.330369	-1.51823	2	-0.106363	1.20319	China	Biocare Fm-200	Shenzhen Biocare Electronics Co Ltd	Biocare	PRK300	Fetal Heart
-1.12976	-0.440785	-0.29063	-1.1749	-0.372795	-0.0449093	-0.328665	-1.51823	2	-0.106363	1.20319	China	Biocare Fm-200	Shenzhen Biocare Electronics Co Ltd	Biocare	PRK300	Fetal Heart
-1.12976	-0.440785	-0.29063	-1.1749	-0.372795	-0.0449093	0.202185	-1.51823	2	-0.106363	1.20319	China	Biocare Fm-200	Shenzhen Biocare Electronics Co Ltd	Biocare	PRK300	Fetal Heart
-1.12976	-0.440785	-0.29063	-1.1749	-0.372795	-0.0449093	-0.330369	-1.51823	2	-0.106363	1.20319	China	Biocare Fm-200	Shenzhen Biocare Electronics Co Ltd	Biocare	PRK300	Fetal Heart
-0.321102	-0.440785	-0.29063	-1.1749	-0.372795	-0.0449093	-0.330369	-1.51823	2	-0.106363	0.268103	China	Sonotrax Basic	Edan Instruments Inc	Sonotrax	PRK300	Fetal Heart
0.352781	-0.440785	-0.29063	-1.1749	-0.372795	-0.0449093	-0.315637	-1.51823	2	-0.0376184	-0.317583	South Korea	Bistos Bt200	Bistos Co Ltd	Bistos	PRK300	Fetal Heart
-0.321102	-0.440785	-0.29063	-1.1749	-0.372795	-0.0449093	-0.194404	-1.51823	2	-0.106363	0.268103	Japan	Hadeco Es-101ex	Hayashi Denki Co Ltd	Hadeco	PRK300	Fetal Heart
1.16144	-0.440785	-0.29063	-1.1749	-0.372795	-0.0449093	-0.276506	-1.51823	2	-0.0454996	-1.14178	UK	Sonicaid 121	Oxford Instruments Medical	Sonicaid	PRK300	Fetal Heart
0.218005	-0.440785	-0.29063	-1.1749	-0.372795	-0.0449093	1.08787	-1.51823	2	-0.0654917	-0.165766	Japan	Hadeco Es-101ex	Hayashi Denki Co Ltd	Hadeco	PRK300	Fetal Heart
1.29622	-0.440785	-0.29063	-1.1749	-0.372795	-0.0449093	-0.283255	-1.51823	2	-0.0809098	-1.36728	UK	Sonicaid 121	Oxford Instruments Medical	Sonicaid	PRK300	Fetal Heart
-0.321102	-0.440785	-0.29063	-1.1749	-0.372795	-0.0449093	-0.280962	-1.51823	2	-0.106363	0.268103	Japan	Hadeco Es-101ex	Hayashi Denki Co Ltd	Hadeco	PRK300	Fetal Heart
0.218005	-0.440785	-0.29063	-1.1749	-0.372795	-0.0449093	-0.314026	-1.51823	2	0.0726294	-0.181022	Japan	Hadeco Es-101ex	Hayashi Denki Co Ltd	Hadeco	PRK300	Fetal Heart
0.218005	-0.440785	-0.29063	-1.1749	-0.372795	-0.0449093	-0.322294	-1.51823	2	-0.0649986	-0.181022	Japan	Hadeco Es-101ex	Hayashi Denki Co Ltd	Hadeco	PRK300	Fetal Heart
-0.321102	-0.440785	-0.29063	-1.1749	-0.372795	-0.0449093	-0.329144	-1.51823	2	-0.106363	0.268103	Japan	Hadeco Es-101ex	Hayashi Denki Co Ltd	Hadeco	PRK300	Fetal Heart
-0.321102	-0.440785	-0.29063	-1.1749	-0.372795	-0.0449093	-0.197055	-1.51823	2	-0.106363	0.268103	Japan	Hadeco Es-101ex	Hayashi Denki Co Ltd	Hadeco	PRK300	Fetal Heart
-0.321102	-0.440785	-0.29063	-1.1749	-0.372795	-0.0449093	-0.310821	-1.51823	2	-0.106363	0.297127	Japan	Hadeco Es-101ex	Hayashi Denki Co Ltd	Hadeco	PRK300	Fetal Heart
0.218005	-0.440785	-0.29063	-1.1749	-0.372795	-0.0449093	-0.296136	-1.51823	2	0.0142829	-0.27814	South Korea	Bionet Baby Care	Bionet Co Ltd	Bionet	PRK300	Fetal Heart
-0.321102	-0.440785	-0.29063	-1.1749	-0.372795	-0.0449093	-0.330369	-1.51823	2	-0.106363	0.297127	Japan	Hadeco Es-101ex	Hayashi Denki Co Ltd	Hadeco	PRK300	Fetal Heart
0.218005	-0.440785	-0.29063	-1.1749	-0.372795	-0.0449093	-0.328527	-1.51823	2	-0.0948263	-0.181022	Japan	Hadeco Es-101ex	Hayashi Denki Co Ltd	Hadeco	PRK300	Fetal Heart
-0.321102	-0.440785	-0.29063	-1.1749	-0.372795	-0.0449093	-0.330369	-1.51823	2	-0.106363	0.268103	Japan	Hadeco Es-101ex	Hayashi Denki Co Ltd	Hadeco	PRK300	Fetal Heart
0.352781	-0.440785	-0.29063	-1.1749	-0.372795	-0.0449093	-0.323159	-1.51823	2	0.0224523	-0.40577	UK	SonicaidOne	Huntleigh Healthcare Ltd	Sonicaid	PRK300	Fetal Heart
-0.321102	-0.440785	-0.29063	-1.1749	-0.372795	-0.0449093	-0.330369	-1.51823	2	-0.106363	0.268103	Japan	Hadeco Es-101ex	Hayashi Denki Co Ltd	Hadeco	PRK300	Fetal Heart
-0.321102	-0.440785	-0.29063	-1.1749	-0.372795	-0.0449093	-0.301725	-1.51823	2	-0.106363	0.268103	Japan	Hadeco Es-101ex	Hayashi Denki Co Ltd	Hadeco	PRK300	Fetal Heart
1.29622	-0.440785	-0.29063	-1.1749	-0.372795	-0.0449093	-0.316327	-1.51823	2	-0.0222166	-1.36728	UK	Sonicaid 121	Oxford Instruments Medical	Sonicaid	PRK300	Fetal Heart
2.50921	-0.440785	2.21895	-1.1749	-0.372795	-0.0449093	-0.309468	-1.51823	2	-0.0579877	-2.51818	UK	Dopplex D500	Huntleigh Healthcare Ltd	Dopplex	PRK300	Fetal Heart
1.43099	-0.440785	4.72854	-1.1749	-0.372795	-0.0449093	-0.322082	-1.51823	2	-0.0634343	-1.47593	UK	Sonicaid 121	Oxford Instruments Medical	Sonicaid	PRK300	Fetal Heart
-1.26454	-0.440785	-0.29063	-1.1749	-0.372795	-0.0449093	-0.330369	-1.51823	2	-0.106363	1.3364	United Kingdom	Sonicaid One	Huntleigh Healthcare Ltd	Sonicaid	PRK358	Fetal Heart
-1.26454	-0.440785	-0.29063	-1.1749	-0.372795	-0.0449093	-0.330369	-1.51823	2	-0.106363	1.3364	United Kingdom	Sonicaid One	Huntleigh Healthcare Ltd	Sonicaid	PRK358	Fetal Heart
0.487558	-0.440785	-0.29063	-1.1749	-0.372795	-0.0449093	-0.327837	-1.51823	2	-0.106363	-0.436655	UK	SonicaidOne	Huntleigh Healthcare Ltd	Sonicaid	PRK358	Fetal Heart
0.487558	-0.440785	2.21895	-1.1749	-0.372795	-0.0449093	-0.30689	-1.51823	2	-0.106363	-0.436655	UK	SonicaidOne	Huntleigh Healthcare Ltd	Sonicaid	PRK358	Fetal Heart
1.29622	-0.440785	2.21895	-1.1749	-0.372795	-0.0449093	-0.324614	-1.51823	2	-0.106363	-1.36579	UK	Sonicaid 121	Oxford Instruments Medical	Sonicaid	PRK358	Fetal Heart
0.083228	-0.440785	-0.29063	-1.1749	-0.372795	-0.0449093	-0.330369	-1.51823	2	-0.106363	-0.0883689	Japan	Hadeco Es-101ex	Hayashi Denki Co Ltd	Hadeco	PRK358	Fetal Heart
0.757111	-0.440785	2.21895	-1.1749	-0.372795	-0.0449093	-0.327229	-1.51823	2	-0.106363	-0.706055	UK	SonicaidOne	Huntleigh Healthcare Ltd	Sonicaid	PRK320	Fetal Heart
0.757111	-0.440785	-0.29063	-1.1749	-0.372795	-0.0449093	-0.198749	-1.51823	2	-0.106363	-0.751451	South Korea	Bistos Bt200	Bistos Co Ltd	Bistos	PRK320	Fetal Heart
0.622335	-0.440785	-0.29063	-1.1749	-0.372795	-0.0449093	-0.311033	-1.51823	2	-0.106363	-0.593681	UK	SonicaidOne	Huntleigh Healthcare Ltd	Sonicaid	PRK311	Fetal Heart
-0.455879	-0.440785	-0.29063	-1.1749	-0.372795	-0.0449093	-0.330369	-1.51823	2	-0.106363	0.509224	UK	Sonicaid One	Huntleigh Healthcare Ltd	Sonicaid	PRK340	Fetal Heart
0.891888	-0.440785	-0.29063	-1.1749	-0.372795	-0.0449093	-0.241214	-1.51823	2	-0.106363	-0.856012	USA	Elite 200	Nicolet Vascular Inc	Elite	PRK340	Fetal Heart
-0.590655	-0.440785	-0.29063	-1.1749	-0.372795	-0.0449093	-0.330369	-1.51823	2	-0.106363	0.591458	USA	Lifedop L250	Summit Doppler	Lifedop	PRK340	Fetal Heart
-0.455879	-0.440785	-0.29063	-1.1749	-0.372795	-0.0449093	2.62957	-1.51823	2	-0.106363	0.517038	South Korea	Bistos Bt200	Bistos Co Ltd	Bistos	PRK340	Fetal Heart
0.622335	-0.440785	-0.29063	-1.1749	-0.372795	-0.0449093	-0.114152	-1.51823	2	-0.106363	-0.627914	USA	Elite 200	Nicolet Vascular Inc	Elite	PRK340	Fetal Heart
0.891888	-0.440785	-0.29063	-1.1749	-0.372795	-0.0449093	-0.254739	-1.51823	2	-0.106363	-0.856012	USA	Elite 200	Nicolet Vascular Inc	Elite	PRK340	Fetal Heart
-0.455879	-0.440785	-0.29063	-1.1749	-0.372795	-0.0449093	-0.330369	-1.51823	2	-0.106363	0.516666	USA	Lifedop L250	Summit Doppler	Lifedop	PRK340	Fetal Heart
-0.455879	-0.440785	-0.29063	-1.1749	-0.372795	-0.0449093	-0.330369	-1.51823	2	-0.106363	0.516666	USA	Lifedop L250	Summit Doppler	Lifedop	PRK340	Fetal Heart
1.83532	-0.440785	-0.29063	-1.1749	-0.372795	-0.0449093	-0.327376	-1.51823	2	-0.106363	-1.90608	UK	Dopplex D500	Huntleigh Healthcare Ltd	Dopplex	PRK340	Fetal Heart
-0.590655	-0.440785	-0.29063	-1.1749	-0.372795	-0.0449093	-0.330369	-1.51823	2	-0.106363	0.591458	USA	Lifedop L250	Summit Doppler	Lifedop	PRK340	Fetal Heart
-0.455879	-0.440785	-0.29063	-1.1749	-0.372795	-0.0449093	-0.330369	-1.51823	2	-0.106363	0.516666	USA	Lifedop L250	Summit Doppler	Lifedop	PRK340	Fetal Heart
-0.455879	-0.440785	-0.29063	-1.1749	-0.372795	-0.0449093	-0.330369	-1.51823	2	-0.106363	0.516666	USA	Lifedop L250	Summit Doppler	Lifedop	PRK340	Fetal Heart
0.891888	-0.440785	-0.29063	-1.1749	-0.372795	-0.0449093	-0.278356	-1.51823	2	-0.106363	-0.856012	USA	Elite 200	Nicolet Vascular Inc	Elite	PRK340	Fetal Heart
-0.590655	-0.440785	-0.29063	-1.1749	-0.372795	-0.0449093	-0.330369	-1.51823	2	-0.106363	0.591458	UK	SonicaidOne	Huntleigh Healthcare Ltd	Sonicaid	PRK340	Fetal Heart
-0.455879	-0.440785	-0.29063	-1.1749	-0.372795	-0.0449093	-0.330369	-1.51823	2	-0.106363	0.509224	UK	SonicaidOne	Huntleigh Healthcare Ltd	Sonicaid	PRK340	Fetal Heart
1.29622	-0.440785	-0.29063	-1.1749	-0.372795	-0.0449093	-0.320158	-1.51823	2	-0.106363	-1.3096	UK	Sonicaid 121	Oxford Instruments Medical	Sonicaid	PRK340	Fetal Heart
-0.725432	-0.440785	-0.29063	-1.1749	-0.372795	-0.0449093	-0.330369	-1.51823	2	-0.106363	0.793137	Japan	Atom Dp-20fhr	Atom Medical Corp	Atom	PRK340	Fetal Heart
-0.725432	-0.440785	-0.29063	-1.1749	-0.372795	-0.0449093	-0.330369	-1.51823	2	-0.106363	0.793137	Japan	Atom Dp-20fhr	Atom Medical Corp	Atom	PRK340	Fetal Heart
-0.725432	-0.440785	-0.29063	-1.1749	-0.372795	-0.0449093	-0.328914	-1.51823	2	-0.106363	0.793137	Japan	Atom Dp-20fhr	Atom Medical Corp	Atom	PRK340	Fetal Heart
-0.725432	-0.440785	-0.29063	-1.1749	-0.372795	-0.0449093	-0.329448	-1.51823	2	-0.106363	0.793137	Japan	Atom Dp-20fhr	Atom Medical Corp	Atom	PRK340	Fetal Heart
-0.725432	-0.440785	-0.29063	-1.1749	-0.372795	-0.0449093	-0.0126502	-1.51823	2	-0.106363	0.793137	Japan	Atom Dp-20fhr	Atom Medical Corp	Atom	PRK340	Fetal Heart
0.891888	-0.440785	-0.29063	-1.1749	-0.372795	-0.0449093	-0.304275	-1.51823	2	-0.106363	-0.863826	UK	SonicaidOne	Huntleigh Healthcare Ltd	Sonicaid	PRK340	Fetal Heart
0.891888	-0.440785	-0.29063	-1.1749	-0.372795	-0.0449093	-0.328757	-1.51823	2	-0.106363	-0.863826	UK	SonicaidOne	Huntleigh Healthcare Ltd	Sonicaid	PRK340	Fetal Heart
0.891888	-0.440785	-0.29063	-1.1749	-0.372795	-0.0449093	0.250303	-1.51823	2	-0.106363	-0.863826	UK	SonicaidOne	Huntleigh Healthcare Ltd	Sonicaid	PRK340	Fetal Heart
-0.455879	-0.440785	-0.29063	-1.1749	-0.372795	-0.0449093	-0.330369	-1.51823	2	-0.106363	0.516666	USA	Lifedop L150	Summit Doppler	Lifedop	PRK340	Fetal Heart
-0.455879	-0.440785	-0.29063	-1.1749	-0.372795	-0.0449093	-0.330369	-1.51823	2	-0.106363	0.517038	South Korea	Bistos Bt200	Bistos Co Ltd	Bistos	PRK340	Fetal Heart
-0.725432	-0.440785	-0.29063	-1.1749	-0.372795	-0.0449093	-0.263984	-1.51823	2	-0.106363	0.793137	Japan	Atom Dp-20fhr	Atom Medical Corp	Atom	PRK340	Fetal Heart
-0.455879	-0.440785	-0.29063	-1.1749	-0.372795	-0.0449093	-0.330369	-1.51823	2	-0.106363	0.51555	UK	SonicaidOne	Huntleigh Healthcare Ltd	Sonicaid	PRK350	Fetal Heart
-0.455879	-0.440785	-0.29063	-1.1749	-0.372795	-0.0449093	-0.237991	-1.51823	2	-0.106363	0.51555	UK	SonicaidOne	Huntleigh Healthcare Ltd	Sonicaid	PRK350	Fetal Heart
-0.455879	-0.440785	-0.29063	-1.1749	-0.372795	-0.0449093	-0.330369	-1.51823	2	-0.106363	0.51555	UK	SonicaidOne	Huntleigh Healthcare Ltd	Sonicaid	PRK350	Fetal Heart
-0.994985	-0.440785	-0.29063	-1.1749	-0.372795	-0.0449093	-0.306816	-1.51823	2	-0.106363	1.05361	China	Acurio AF-703-L	Shenzhen Acurio Instrument Co Ltd	Acurio	PRK360	Fetal Heart
-0.455879	-0.440785	-0.29063	-1.1749	-0.372795	-0.0449093	-0.306522	-1.51823	2	-0.106363	0.519271	China	Sonoline C	Contec Medical System Co Ltd	Sonoline C	PRK360	Fetal Heart
-0.455879	-0.440785	-0.29063	-1.1749	-0.372795	-0.0449093	-0.203151	-1.51823	2	-0.106363	0.519271	China	Sonoline C	Contec Medical System Co Ltd	Sonoline C	PRK360	Fetal Heart
-0.455879	-0.440785	-0.29063	-1.1749	-0.372795	-0.0449093	-0.143487	-1.51823	2	-0.106363	0.50848	USA	Lifedop L250	Summit Doppler	Lifedop	PRK360	Fetal Heart
0.487558	-0.440785	-0.29063	-1.1749	-0.372795	-0.0449093	-0.313556	-1.51823	2	-0.106363	-0.428841	UK	Multi Dopplex Ii	Huntleigh Healthcare Ltd	Huntleigh	PRK360	Fetal Heart
-0.455879	-0.440785	-0.29063	-1.1749	-0.372795	-0.0449093	-0.305067	-1.51823	2	-0.106363	0.516666	South Korea	Bistos Bt200	Bistos Co Ltd	Bistos	PRK360	Fetal Heart
-0.455879	-0.440785	-0.29063	-1.1749	-0.372795	-0.0449093	2.28808	-1.51823	2	-0.106363	0.516666	South Korea	Bistos Bt200	Bistos Co Ltd	Bistos	PRK360	Fetal Heart
-0.455879	-0.440785	-0.29063	-1.1749	-0.372795	-0.0449093	-0.0695609	-1.51823	2	-0.106363	0.516666	South Korea	Bistos Bt200	Bistos Co Ltd	Bistos	PRK360	Fetal Heart
1.83532	-0.440785	-0.29063	-1.1749	-0.372795	-0.0449093	-0.306172	-1.51823	2	-0.106363	-1.91501	Japan	Hadeco Es-102s	Hayashi Denki Co Ltd	Hadeco	PRK360	Fetal Heart
0.218005	-0.440785	-0.29063	-1.1749	-0.372795	-0.0449093	-0.230948	-1.51823	2	-0.106363	-0.171347	UK	SonicaidOne	Huntleigh Healthcare Ltd	Sonicaid	PRK360	Fetal Heart
-0.455879	-0.440785	-0.29063	-1.1749	-0.372795	-0.0449093	-0.302351	-1.51823	2	-0.106363	0.516666	South Korea	Bistos Bt200	Bistos Co Ltd	Bistos	PRK360	Fetal Heart
-0.455879	-0.440785	-0.29063	-1.1749	-0.372795	-0.0449093	-0.329881	-1.51823	2	-0.106363	0.516666	South Korea	Bistos Bt200	Bistos Co Ltd	Bistos	PRK360	Fetal Heart
0.218005	-0.440785	-0.29063	-1.1749	-0.372795	-0.0449093	-0.328297	-1.51823	2	-0.106363	-0.171347	UK	SonicaidOne	Huntleigh Healthcare Ltd	Sonicaid	PRK360	Fetal Heart
0.218005	-0.440785	-0.29063	-1.1749	-0.372795	-0.0449093	-0.243055	-1.51823	2	-0.106363	-0.171347	UK	SonicaidOne	Huntleigh Healthcare Ltd	Sonicaid	PRK360	Fetal Heart
-0.455879	-0.440785	-0.29063	-1.1749	-0.372795	-0.0449093	-0.330369	-1.51823	2	-0.106363	0.516666	South Korea	Bistos Bt200	Bistos Co Ltd	Bistos	PRK360	Fetal Heart
-0.455879	-0.440785	-0.29063	-1.1749	-0.372795	-0.0449093	-0.330369	-1.51823	2	-0.106363	0.516666	South Korea	Bistos Bt200	Bistos Co Ltd	Bistos	PRK360	Fetal Heart
-0.455879	-0.440785	-0.29063	-1.1749	-0.372795	-0.0449093	-0.323629	-1.51823	2	-0.106363	0.516666	South Korea	Bistos Bt200	Bistos Co Ltd	Bistos	PRK360	Fetal Heart
-0.455879	-0.440785	-0.29063	-1.1749	-0.372795	-0.0449093	-0.312718	-1.51823	2	-0.106363	0.516666	South Korea	Bistos Bt200	Bistos Co Ltd	Bistos	PRK360	Fetal Heart
-0.455879	-0.440785	-0.29063	-1.1749	-0.372795	-0.0449093	-0.312755	-1.51823	2	-0.106363	0.516666	South Korea	Bistos Bt200	Bistos Co Ltd	Bistos	PRK360	Fetal Heart
-0.455879	-0.440785	-0.29063	-1.1749	-0.372795	-0.0449093	-0.311475	-1.51823	2	-0.106363	0.516666	South Korea	Bistos Bt200	Bistos Co Ltd	Bistos	PRK360	Fetal Heart
-0.455879	-0.440785	-0.29063	-1.1749	-0.372795	-0.0449093	-0.330369	-1.51823	2	-0.106363	0.516666	South Korea	Bistos Bt200	Bistos Co Ltd	Bistos	PRK360	Fetal Heart
-0.455879	-0.440785	-0.29063	-1.1749	-0.372795	-0.0449093	-0.330369	-1.51823	2	-0.106363	0.516666	South Korea	Bistos Bt200	Bistos Co Ltd	Bistos	PRK360	Fetal Heart
-0.455879	-0.440785	-0.29063	-1.1749	-0.372795	-0.0449093	-0.330369	-1.51823	2	-0.106363	0.516666	South Korea	Bistos Bt200	Bistos Co Ltd	Bistos	PRK360	Fetal Heart
0.218005	-0.440785	4.72854	-1.1749	-0.372795	-0.0449093	-0.326842	-1.51823	2	-0.106363	-0.179533	UK	SonicaidOne	Huntleigh Healthcare Ltd	Sonicaid	PRK360	Fetal Heart
-1.26454	-0.440785	-0.29063	-1.1749	4.83955	-0.0449093	-0.330369	-1.51823	2	-0.106363	1.2058	The Netherlands	Philips BV Pulsera	Philips Medical Systems	Philips	PRK300	Radiographic System
-0.590655	-0.440785	-0.29063	-1.1749	4.83955	-0.0449093	-0.305048	-1.51823	2	-0.106363	0.528945	Germany	Arcadis Varic	Siemens Medical Systems	Siemens	PRK300	Radiographic System
0.487558	-0.440785	-0.29063	-1.1749	4.83955	-0.0449093	16.8505	-1.51823	2	3.48023	-0.483539	Germany	Arcadis Varic	Siemens Medical Systems	Siemens	PRK300	Radiographic System
-0.321102	-0.440785	-0.29063	-1.1749	4.83955	-0.0449093	5.48847	-1.51823	2	-0.106363	0.266987	Japan	Toshiba Sxt-1000a	Toshiba Medical Systems Corp	Toshiba	PRK300	Radiographic System
1.16144	2.26841	-0.29063	-1.1749	4.83955	-0.0449093	0.80338	-1.51823	2	6.57062	-1.10941	The Netherlands	Philips BV Libra	Philips Medical Systems	Philips	PRK300	Radiographic System
1.02666	2.26841	-0.29063	-1.1749	4.83955	-0.0449093	-0.175335	-1.51823	2	1.73431	-1.02904	Germany	Siremobil Compact	Siemens AG	Siremobil	PRK300	Radiographic System
-0.455879	-0.440785	-0.29063	-1.1749	4.83955	-0.0449093	1.95403	-1.51823	2	-0.106363	0.517038	China	Brivo Oec 785	GE Hualun Medical Systems Co Ltd	Brivo	PRK358	Radiographic System
-0.590655	-0.440785	-0.29063	-1.1749	4.83955	-0.0449093	0.0229639	-1.51823	2	-0.106363	0.640575	Germany	Arcadis Varic	Siemens Medical Systems	Siemens	PRK320	Radiographic System
-0.725432	-0.440785	-0.29063	-1.1749	4.83955	-0.0449093	-0.32454	-1.51823	2	-0.106363	0.786811	The Netherlands	Philips BV Pulsera	Philips Medical Systems	Philips	PRK340	Radiographic System
0.083228	-0.440785	-0.29063	-1.1749	4.83955	-0.0449093	3.32098	-1.51823	2	-0.106363	-0.0831595	Germany	Siremobil Compact L	Siemens AG	Siremobil	PRK340	Radiographic System
-1.26454	-0.440785	-0.29063	-1.1749	4.83955	-0.0449093	-0.198289	-1.51823	2	-0.106363	1.20617	The Netherlands	Philips BV Pulsera	Philips Medical Systems	Philips	PRK360	Radiographic System
2.10488	-0.440785	2.21895	-1.1749	-0.372795	-0.0449093	1.53691	-1.51823	2	-0.106363	-2.18441	Japan	Pentax Fg-32x	Pentax Corp	Pentax	PRK320	Gastroscopes
1.43099	-0.440785	-0.29063	-1.1749	-0.372795	-0.0449093	-0.147418	-1.51823	2	-0.106363	-1.37918	Japan	Olympus Gif-E	Olympus Optical Co Ltd	Olympus	PRK360	Gastroscopes
-0.590655	-0.440785	-0.29063	0.412625	-0.372795	-0.0449093	-0.330369	-1.51823	2	-0.106363	0.617505	South Korea	Bistos Bt500	Bistos Co Ltd	Bistos	PRK310	Incubator
-0.590655	-0.440785	-0.29063	0.412625	-0.372795	-0.0449093	-0.330369	-1.51823	2	-0.106363	0.617505	South Korea	Bistos Bt500	Bistos Co Ltd	Bistos	PRK310	Incubator
-0.590655	-0.440785	-0.29063	0.412625	-0.372795	-0.0449093	-0.325922	-1.51823	2	-0.0903156	0.536387	Japan	Rabee Incu i	Atom Medical Corp	Rabee	PRK333	Incubator
-0.994985	-0.440785	-0.29063	0.412625	-0.372795	-0.0449093	-0.330369	-1.51823	2	-0.106363	1.04542	Japan	Rabee Incu i	Atom Medical Corp	Rabee	PRK330	Incubator
-0.590655	-0.440785	-0.29063	0.412625	-0.372795	-0.0449093	-0.330369	-1.51823	2	-0.106363	0.609691	Japan	Rabee Incu i	Atom Medical Corp	Rabee	PRK342	Incubator
-0.590655	-0.440785	-0.29063	0.412625	-0.372795	-0.0449093	-0.330369	-1.51823	2	-0.106363	0.53676	Japan	Rabee Incu i	Atom Medical Corp	Rabee	PRK342	Incubator
-1.12976	-0.440785	-0.29063	0.412625	-0.372795	-0.0449093	-0.330369	-1.51823	2	-0.106363	1.11984	Japan	Atom Air Incu i	Atom Medical Corp	Atom	PRK300	Incubator
-1.12976	-0.440785	-0.29063	0.412625	-0.372795	-0.0449093	-0.330369	-1.51823	2	-0.106363	1.11984	Japan	Atom Air Incu i	Atom Medical Corp	Atom	PRK300	Incubator
-1.12976	-0.440785	-0.29063	0.412625	-0.372795	-0.0449093	-0.286551	-1.51823	2	-0.106363	1.11984	Japan	Atom Air Incu i	Atom Medical Corp	Atom	PRK300	Incubator
-1.12976	-0.440785	-0.29063	0.412625	-0.372795	-0.0449093	-0.330369	-1.51823	2	-0.106363	1.11984	Japan	Atom Air Incu i	Atom Medical Corp	Atom	PRK300	Incubator
-1.12976	-0.440785	-0.29063	0.412625	-0.372795	-0.0449093	-0.330369	-1.51823	2	-0.106363	1.11984	Japan	Atom Air Incu i	Atom Medical Corp	Atom	PRK300	Incubator
-1.12976	-0.440785	-0.29063	0.412625	-0.372795	-0.0449093	-0.328454	-1.51823	2	-0.106363	1.11984	Japan	Atom Air Incu i	Atom Medical Corp	Atom	PRK300	Incubator
-1.12976	-0.440785	-0.29063	0.412625	-0.372795	-0.0449093	-0.330369	-1.51823	2	-0.106363	1.11984	Japan	Atom Air Incu i	Atom Medical Corp	Atom	PRK300	Incubator
-1.12976	-0.440785	-0.29063	0.412625	-0.372795	-0.0449093	-0.330369	-1.51823	2	-0.106363	1.11984	Japan	Atom Air Incu i	Atom Medical Corp	Atom	PRK300	Incubator
-1.12976	-0.440785	-0.29063	0.412625	-0.372795	-0.0449093	-0.328988	-1.51823	2	-0.106363	1.11984	Japan	Atom Air Incu i	Atom Medical Corp	Atom	PRK300	Incubator
-1.12976	-0.440785	-0.29063	0.412625	-0.372795	-0.0449093	-0.330369	-1.51823	2	-0.106363	1.11984	Japan	Atom Air Incu i	Atom Medical Corp	Atom	PRK300	Incubator
-1.12976	-0.440785	-0.29063	0.412625	-0.372795	-0.0449093	-0.330369	-1.51823	2	-0.106363	1.11984	Japan	Atom Air Incu i	Atom Medical Corp	Atom	PRK300	Incubator
-1.12976	-0.440785	-0.29063	0.412625	-0.372795	-0.0449093	-0.330369	-1.51823	2	-0.106363	1.11984	Japan	Atom Air Incu i	Atom Medical Corp	Atom	PRK300	Incubator
-1.12976	-0.440785	-0.29063	0.412625	-0.372795	-0.0449093	-0.330369	-1.51823	2	-0.106363	1.11984	Japan	Atom Air Incu i	Atom Medical Corp	Atom	PRK300	Incubator
-1.12976	-0.440785	-0.29063	0.412625	-0.372795	-0.0449093	-0.328914	-1.51823	2	-0.106363	1.11984	Japan	Atom Air Incu i	Atom Medical Corp	Atom	PRK300	Incubator
-1.12976	-0.440785	-0.29063	0.412625	-0.372795	-0.0449093	-0.330369	-1.51823	2	-0.106363	1.11984	Japan	Atom Air Incu i	Atom Medical Corp	Atom	PRK300	Incubator
-1.12976	-0.440785	-0.29063	0.412625	-0.372795	-0.0449093	-0.203721	-1.51823	2	-0.106363	1.11984	Japan	Atom Air Incu i	Atom Medical Corp	Atom	PRK300	Incubator
-1.12976	-0.440785	-0.29063	0.412625	-0.372795	-0.0449093	-0.268449	-1.51823	2	-0.106363	1.11984	Japan	Atom Air Incu i	Atom Medical Corp	Atom	PRK300	Incubator
-1.12976	-0.440785	-0.29063	0.412625	-0.372795	-0.0449093	-0.329199	-1.51823	2	-0.106363	1.11984	Japan	Atom Air Incu i	Atom Medical Corp	Atom	PRK300	Incubator
0.757111	-0.440785	-0.29063	0.412625	-0.372795	-0.0449093	5.13721	-1.51823	2	0.0415501	-0.705311	Japan	Atom V-2100gb	Atom Medical Corp	Atom	PRK300	Incubator
0.757111	-0.440785	-0.29063	0.412625	-0.372795	-0.0449093	-0.255679	-1.51823	2	0.127964	-0.705311	Japan	Atom V-2100gb	Atom Medical Corp	Atom	PRK300	Incubator
1.9701	-0.440785	-0.29063	0.412625	-0.372795	-0.0449093	1.61368	-1.51823	2	0.117769	-2.02366	USA	Isolette C400h-1e	Hill-Rom Air Shields	Isolette	PRK300	Incubator
1.9701	-0.440785	-0.29063	0.412625	-0.372795	-0.0449093	0.068126	-1.51823	2	-0.00677217	-2.02366	USA	Isolette C400h-1e	Hill-Rom Air Shields	Isolette	PRK300	Incubator
0.757111	-0.440785	-0.29063	0.412625	-0.372795	-0.0449093	0.200684	-1.51823	2	0.766524	-0.705311	Japan	Atom V-2100gb	Atom Medical Corp	Atom	PRK300	Incubator
0.757111	-0.440785	-0.29063	0.412625	-0.372795	-0.0449093	-0.168209	-1.51823	2	0.555829	-0.705311	Japan	Atom V-2100gb	Atom Medical Corp	Atom	PRK300	Incubator
0.757111	-0.440785	-0.29063	0.412625	-0.372795	-0.0449093	8.13503	-1.51823	2	0.501261	-0.705311	Japan	Atom V-2100gb	Atom Medical Corp	Atom	PRK300	Incubator
1.9701	-0.440785	-0.29063	0.412625	-0.372795	-0.0449093	-0.144242	-1.51823	2	0.219372	-2.02627	USA	Isolette C400h-1e	Hill-Rom Air Shields	Isolette	PRK300	Incubator
1.9701	-0.440785	4.72854	0.412625	-0.372795	-0.0449093	-0.209292	-1.51823	2	0.348769	-2.02627	USA	Isolette C450H	Hill-Rom Air Shields	Isolette	PRK300	Incubator
-0.590655	-0.440785	-0.29063	0.412625	-0.372795	-0.0449093	0.509582	-1.51823	2	-0.106363	0.527085	Japan	Rabee Incu i	Atom Medical Corp	Rabee	PRK300	Incubator
-0.590655	-0.440785	-0.29063	0.412625	-0.372795	-0.0449093	0.447562	-1.51823	2	-0.106363	0.527085	Japan	Rabee Incu i	Atom Medical Corp	Rabee	PRK300	Incubator
-0.590655	-0.440785	-0.29063	0.412625	-0.372795	-0.0449093	-0.326456	-1.51823	2	-0.106363	0.527085	Japan	Rabee Incu i	Atom Medical Corp	Rabee	PRK300	Incubator
-0.590655	-0.440785	-0.29063	0.412625	-0.372795	-0.0449093	0.384298	-1.51823	2	-0.106363	0.537876	USA	Giraffe Omnibed	GE Medical Systems	Giraffe	PRK300	Incubator
-0.590655	-0.440785	-0.29063	0.412625	-0.372795	-0.0449093	-0.326907	-1.51823	2	-0.106363	0.537876	USA	Giraffe Omnibed	GE Medical Systems	Giraffe	PRK300	Incubator
-0.590655	-0.440785	-0.29063	0.412625	-0.372795	-0.0449093	0.902323	-1.51823	2	-0.106363	0.537876	USA	Giraffe Omnibed	GE Medical Systems	Giraffe	PRK300	Incubator
-0.590655	-0.440785	-0.29063	0.412625	-0.372795	-0.0449093	2.0669	-1.51823	2	-0.106363	0.537876	USA	Giraffe Omnibed	GE Medical Systems	Giraffe	PRK300	Incubator
-0.455879	-0.440785	-0.29063	0.412625	-0.372795	-0.0449093	-0.266378	-1.51823	2	-0.106363	0.498061	USA	Isolette C2000c2hs-Ic	Hill-Rom Air Shields	Isolette	PRK300	Incubator
1.9701	-0.440785	-0.29063	0.412625	-0.372795	-0.0449093	-0.217192	-1.51823	2	0.28914	-2.02366	USA	Isolette C400h-1e	Hill-Rom Air Shields	Isolette	PRK300	Incubator
0.757111	-0.440785	-0.29063	0.412625	-0.372795	-0.0449093	0.334247	-1.51823	2	0.428492	-0.82029	Brazil	Fanem C-186-Ts	Fanem Sao Paulo	Fanem	PRK300	Incubator
1.43099	-0.440785	-0.29063	0.412625	-0.372795	-0.0449093	-0.0875245	-1.51823	2	0.838323	-1.45695	USA	Isolette C450H	Hill-Rom Air Shields	Isolette	PRK300	Incubator
1.9701	-0.440785	4.72854	0.412625	-0.372795	-0.0449093	-0.273974	-1.51823	2	0.247411	-2.02627	USA	Isolette C400h-1e	Hill-Rom Air Shields	Isolette	PRK300	Incubator
1.9701	-0.440785	-0.29063	0.412625	-0.372795	-0.0449093	1.76189	-1.51823	2	0.67508	-2.02627	USA	Isolette C450H	Hill-Rom Air Shields	Isolette	PRK300	Incubator
1.9701	-0.440785	2.21895	0.412625	-0.372795	-0.0449093	-0.317018	-1.51823	2	0.0483977	-2.02366	USA	Isolette C400h-1e	Hill-Rom Air Shields	Isolette	PRK300	Incubator
1.9701	-0.440785	4.72854	0.412625	-0.372795	-0.0449093	-0.301209	-1.51823	2	-0.00050501	-2.02366	USA	Isolette C400h-1e	Hill-Rom Air Shields	Isolette	PRK300	Incubator
1.9701	-0.440785	2.21895	0.412625	-0.372795	-0.0449093	-0.319596	-1.51823	2	-0.0656012	-2.02366	USA	Isolette C400h-1e	Hill-Rom Air Shields	Isolette	PRK300	Incubator
1.9701	-0.440785	4.72854	0.412625	-0.372795	-0.0449093	-0.101658	-1.51823	2	0.44735	-2.02627	USA	Isolette C450H	Hill-Rom Air Shields	Isolette	PRK300	Incubator
1.9701	-0.440785	4.72854	0.412625	-0.372795	-0.0449093	-0.100185	-1.51823	2	0.392727	-2.02627	USA	Isolette C400h-1e	Hill-Rom Air Shields	Isolette	PRK300	Incubator
1.9701	-0.440785	4.72854	0.412625	-0.372795	-0.0449093	-0.270521	-1.51823	2	0.46492	-2.02627	USA	Isolette C450H	Hill-Rom Air Shields	Isolette	PRK300	Incubator
0.218005	2.26841	-0.29063	0.412625	-0.372795	-0.0449093	-0.121932	-1.51823	2	0.2138	-0.161673	Japan	Atom V-2100g	Atom Medical Corp	Atom	PRK300	Incubator
0.218005	2.26841	-0.29063	0.412625	-0.372795	-0.0449093	1.15368	-1.51823	2	0.476107	-0.161673	Japan	Atom V-2100g	Atom Medical Corp	Atom	PRK300	Incubator
0.218005	2.26841	-0.29063	0.412625	-0.372795	-0.0449093	-0.123304	-1.51823	2	0.00821431	-0.161673	Japan	Atom V-2100g	Atom Medical Corp	Atom	PRK300	Incubator
1.29622	-0.440785	-0.29063	0.412625	-0.372795	-0.0449093	-0.0259088	-1.51823	2	-0.106363	-1.36579	USA	Isolette C450H	Hill-Rom Air Shields	Isolette	PRK358	Incubator
-0.455879	-0.440785	-0.29063	0.412625	-0.372795	-0.0449093	-0.165262	-1.51823	2	-0.106363	0.517038	USA	Giraffe Omnibed	GE Medical Systems	Giraffe	PRK358	Incubator
-0.455879	-0.440785	-0.29063	0.412625	-0.372795	-0.0449093	-0.308649	-1.51823	2	-0.106363	0.498433	USA	Isolette C2000	Hill-Rom Air Shields	Isolette	PRK358	Incubator
-0.0515487	2.26841	-0.29063	0.412625	-0.372795	-0.0449093	-0.326456	-1.51823	2	-0.106363	-0.00278582	Japan	Atom V-2100g	Atom Medical Corp	Atom	PRK358	Incubator
-1.12976	-0.440785	-0.29063	0.412625	-0.372795	-0.0449093	-0.329338	-1.51823	2	-0.106363	1.17082	Japan	Atom Air Incu i	Atom Medical Corp	Atom	PRK320	Incubator
2.10488	-0.440785	4.72854	0.412625	-0.372795	-0.0449093	0.0353939	-1.51823	2	-0.106363	-2.18441	USA	Isolette C100/200-2	Air-Shields Vickers	Isolette	PRK320	Incubator
-0.321102	-0.440785	-0.29063	0.412625	-0.372795	-0.0449093	-0.327459	-1.51823	2	-0.106363	0.265498	Japan	Rabee Incu i	Atom Medical Corp	Rabee	PRK320	Incubator
-0.321102	-0.440785	-0.29063	0.412625	-0.372795	-0.0449093	-0.223112	-1.51823	2	-0.106363	0.26401	Japan	Rabee Incu i	Atom Medical Corp	Rabee	PRK320	Incubator
2.10488	-0.440785	2.21895	0.412625	-0.372795	-0.0449093	-0.0190309	-1.51823	2	-0.106363	-2.18441	USA	Isolette C-286h-1e	Hill-Rom Air Shields	Isolette	PRK320	Incubator
0.757111	-0.440785	-0.29063	0.412625	-0.372795	-0.0449093	0.343666	-1.51823	2	-0.106363	-0.717962	USA	Isolette C2000	Hill-Rom Air-Shields	Hill-Rom Air-Shields	PRK320	Incubator
-0.186325	-0.440785	-0.29063	0.412625	-0.372795	-0.0449093	0.536716	-1.51823	2	-0.106363	0.245405	Japan	Rabee Incu i	Atom Medical Corp	Rabee	PRK320	Incubator
0.218005	2.26841	-0.29063	0.412625	-0.372795	-0.0449093	0.106401	-1.51823	2	-0.106363	-0.170975	Japan	Atom V-2100g	Atom Medical Corp	Atom	PRK320	Incubator
0.757111	-0.440785	-0.29063	0.412625	-0.372795	-0.0449093	-0.308115	-1.51823	2	-0.106363	-0.708288	Germany	Draeger C450h	Drager Medical AG & Co KGaA	Draeger	PRK340	Incubator
2.37443	-0.440785	4.72854	0.412625	-0.372795	-0.0449093	-0.278577	-1.51823	2	-0.106363	-2.45641	USA	Isolette C100	Hill-Rom Air Shields	Isolette	PRK340	Incubator
1.9701	-0.440785	-0.29063	0.412625	-0.372795	-0.0449093	-0.295077	-1.51823	2	-0.106363	-2.02069	USA	Isolette C450H	Hill-Rom Air Shields	Isolette	PRK340	Incubator
1.9701	-0.440785	-0.29063	0.412625	-0.372795	-0.0449093	-0.297351	-1.51823	2	-0.106363	-2.02069	USA	Isolette C450H	Hill-Rom Air Shields	Isolette	PRK340	Incubator
1.9701	-0.440785	-0.29063	0.412625	-0.372795	-0.0449093	-0.304422	-1.51823	2	-0.106363	-2.02069	USA	Isolette C450H-1E	Air-Shields Vickers	Isolette	PRK340	Incubator
-0.455879	-0.440785	-0.29063	0.412625	-0.372795	-0.0449093	-0.320931	-1.51823	2	-0.106363	0.523736	Japan	Rabee Incu i	Atom Medical Corp	Rabee	PRK340	Incubator
-0.455879	-0.440785	-0.29063	0.412625	-0.372795	-0.0449093	-0.328675	-1.51823	2	-0.106363	0.523736	Japan	Rabee Incu i	Atom Medical Corp	Rabee	PRK340	Incubator
-0.455879	-0.440785	-0.29063	0.412625	-0.372795	-0.0449093	-0.330369	-1.51823	2	-0.106363	0.523736	Japan	Rabee Incu i	Atom Medical Corp	Rabee	PRK340	Incubator
-0.455879	-0.440785	-0.29063	0.412625	-0.372795	-0.0449093	1.15048	-1.51823	2	-0.106363	0.523736	Japan	Rabee Incu i	Atom Medical Corp	Rabee	PRK340	Incubator
-0.455879	-0.440785	-0.29063	0.412625	-0.372795	-0.0449093	-0.180058	-1.51823	2	-0.106363	0.523736	Japan	Rabee Incu i	Atom Medical Corp	Rabee	PRK340	Incubator
-0.455879	-0.440785	-0.29063	0.412625	-0.372795	-0.0449093	1.01021	-1.51823	2	-0.106363	0.523736	Japan	Rabee Incu i	Atom Medical Corp	Rabee	PRK340	Incubator
-0.321102	-0.440785	-0.29063	0.412625	-0.372795	-0.0449093	-0.0422427	-1.51823	2	-0.106363	0.317965	France	Satis 3552	Mediprema	Satis	PRK340	Incubator
-0.321102	-0.440785	-0.29063	0.412625	-0.372795	-0.0449093	-0.26461	-1.51823	2	-0.106363	0.317965	France	Satis 3552	Mediprema	Satis	PRK340	Incubator
0.487558	2.26841	-0.29063	0.412625	-0.372795	-0.0449093	-0.149361	-1.51823	2	-0.106363	-0.496563	Japan	Atom V-2100g	Atom Medical Corp	Atom	PRK340	Incubator
-0.0515487	-0.440785	-0.29063	0.412625	-0.372795	-0.0449093	2.01694	-1.51823	2	-0.106363	0.0266101	USA	Ohio Care Plus 2000	Datex-Ohmeda Inc	Ohio Care Plus	PRK360	Incubator
0.218005	-0.440785	-0.29063	0.412625	-0.372795	-0.0449093	4.41117	-1.51823	2	-0.106363	-0.166882	Argentina	Medix Pc-305	Medix Industrial Y Commercial Sa	Medix	PRK360	Incubator
0.218005	-0.440785	-0.29063	0.412625	-0.372795	-0.0449093	2.0682	-1.51823	2	-0.106363	-0.166882	Argentina	Medix Pc-305	Medix Industrial Y Commercial Sa	Medix	PRK360	Incubator
-0.455879	-0.440785	-0.29063	0.412625	-0.372795	-0.0449093	-0.245974	-1.51823	2	-0.106363	0.50141	Japan	Rabee Incu i	Atom Medical Corp	Rabee	PRK360	Incubator
-0.0515487	2.26841	-0.29063	0.412625	-0.372795	-0.0449093	-0.190997	-1.51823	2	-0.106363	-0.00650682	Japan	Atom V-2100g	Atom Medical Corp	Atom	PRK360	Incubator
-0.0515487	2.26841	-0.29063	0.412625	-0.372795	-0.0449093	-0.287849	-1.51823	2	-0.106363	-0.00650682	Japan	Atom V-2100g	Atom Medical Corp	Atom	PRK360	Incubator
-0.0515487	2.26841	-0.29063	0.412625	-0.372795	-0.0449093	-0.230616	-1.51823	2	-0.106363	-0.00650682	Japan	Atom V-2100g	Atom Medical Corp	Atom	PRK360	Incubator
0.218005	2.26841	-0.29063	0.412625	-0.372795	-0.0449093	-0.28156	-1.51823	2	-0.106363	-0.171347	Japan	Atom V-2100g	Atom Medical Corp	Atom	PRK360	Incubator
0.218005	2.26841	-0.29063	0.412625	-0.372795	-0.0449093	-0.226049	-1.51823	2	-0.106363	-0.171347	Japan	Atom V-2100g	Atom Medical Corp	Atom	PRK360	Incubator
-0.590655	-0.440785	-0.29063	0.412625	-0.372795	-0.0449093	-0.329605	0.658585	2	-0.105454	0.617877	Brazil	Olidef Rwt Plus	Olidef	Olidef	PRK310	Incubator
1.29622	-0.440785	-0.29063	0.412625	-0.372795	-0.0449093	-0.298355	0.658585	2	0.265778	-1.25751	USA	Air Shields Isolette Ti500	Air-Shields Inc	Air Shields	PRK310	Incubator
1.9701	-0.440785	4.72854	0.412625	-0.372795	-0.0449093	-0.308059	0.658585	2	0.0666703	-2.04562	Germany	Medap T 1500	Medap	Medap	PRK310	Incubator
-0.321102	-0.440785	-0.29063	0.412625	-0.372795	-0.0449093	-0.305739	0.658585	2	-0.0296417	0.260289	Japan	Transcapsule V-707	Atom Medical Corp	Transcapsule	PRK326	Incubator
-1.26454	-0.440785	-0.29063	0.412625	-0.372795	-0.0449093	-0.330369	0.658585	2	-0.106363	1.26608	Japan	Transcapsule V-707	Atom Medical Corp	Atom	PRK333	Incubator
-0.590655	-0.440785	-0.29063	0.412625	-0.372795	-0.0449093	-0.126453	0.658585	2	-0.104993	0.534527	Japan	Transcapsule V-707	Atom Medical Corp	Transcapsule	PRK319	Incubator
-0.455879	-0.440785	-0.29063	0.412625	-0.372795	-0.0449093	-0.330369	0.658585	2	-0.106363	0.44299	Japan	Transcapsule V-80tr	Atom Medical Corp	Transcapsule	PRK330	Incubator
-0.725432	-0.440785	-0.29063	0.412625	-0.372795	-0.0449093	-0.330369	0.658585	2	-0.106363	0.765973	Brazil	Fanem It 158-Ts	Fanem Ltda	Fanem	PRK330	Incubator
-0.590655	-0.440785	-0.29063	0.412625	-0.372795	-0.0449093	-0.330369	0.658585	2	-0.106363	0.635738	Japan	Transcapsule V-707	Atom Medical Corp	Transcapsule	PRK342	Incubator
0.757111	-0.440785	-0.29063	0.412625	-0.372795	-0.0449093	-0.32362	0.658585	2	-0.0735662	-0.701962	Japan	Transcapsule V-80tr	Atom Medical Corp	Transcapsule	PRK342	Incubator
-1.26454	-0.440785	-0.29063	0.412625	-0.372795	-0.0449093	-0.330369	0.658585	2	-0.106363	1.25863	Brazil	Fanem It 158-Ts	Fanem Ltda	Fanem	PRK300	Incubator
-0.994985	-0.440785	-0.29063	0.412625	-0.372795	-0.0449093	-0.330369	0.658585	2	-0.106363	1.0577	Japan	Transcapsule V-707	Atom Medical Corp	Transcapsule	PRK300	Incubator
-0.994985	-0.440785	-0.29063	0.412625	-0.372795	-0.0449093	-0.330369	0.658585	2	-0.106363	1.04691	Japan	Transcapsule V-707	Atom Medical Corp	Transcapsule	PRK300	Incubator
-0.455879	-0.440785	-0.29063	0.412625	-0.372795	-0.0449093	-0.330369	0.658585	2	-0.106363	0.521131	Japan	Transcapsule V-707	Atom Medical Corp	Transcapsule	PRK300	Incubator
-0.994985	-0.440785	-0.29063	0.412625	-0.372795	-0.0449093	-0.330369	0.658585	2	-0.106363	1.04765	Japan	Transcapsule V-707	Atom Medical Corp	Transcapsule	PRK300	Incubator
-0.590655	-0.440785	-0.29063	0.412625	-0.372795	-0.0449093	0.838773	0.658585	2	-0.106363	0.53676	USA	Air-Shields Ti500-1c	Draeger Medical Systems Inc	Air-Shields	PRK300	Incubator
0.757111	-0.440785	-0.29063	0.412625	-0.372795	-0.0449093	-0.0325841	0.658585	2	-0.00152992	-0.729498	Brazil	Fanem It 158-Ts	Fanem Ltda	Fanem	PRK300	Incubator
1.29622	-0.440785	-0.29063	0.412625	-0.372795	-0.0449093	0.378138	0.658585	2	0.12913	-1.29583	USA	Air Shields Isolette Ti500	Air-Shields Inc	Air Shields	PRK300	Incubator
-0.455879	-0.440785	-0.29063	0.412625	-0.372795	-0.0449093	-0.210553	0.658585	2	-0.106363	0.459363	Japan	Transcapsule V-707	Atom Medical Corp	Transcapsule	PRK300	Incubator
1.29622	-0.440785	-0.29063	0.412625	-0.372795	-0.0449093	-0.31978	0.658585	2	0.0948553	-1.36579	USA	Isolette C-25td-1	Hill-Rom Air Shields	Isolette	PRK300	Incubator
0.083228	-0.440785	-0.29063	0.412625	-0.372795	-0.0449093	-0.161957	0.658585	2	0.694967	-0.1453	Japan	Atom Transcapsule V-707	Atom Medical Corp	Atom	PRK300	Incubator
-0.455879	-0.440785	-0.29063	0.412625	-0.372795	-0.0449093	-0.263118	0.658585	2	-0.106363	0.517038	Japan	Transcapsule V-707	Atom Medical Corp	Transcapsule	PRK300	Incubator
-0.455879	-0.440785	-0.29063	0.412625	-0.372795	-0.0449093	-0.130532	0.658585	2	-0.106363	0.517038	Japan	Transcapsule V-707	Atom Medical Corp	Transcapsule	PRK300	Incubator
0.218005	-0.440785	-0.29063	0.412625	-0.372795	-0.0449093	-0.259104	0.658585	2	1.7667	-0.186975	Brazil	Fanem It 158-Ts	Fanem Ltda	Fanem	PRK300	Incubator
1.9701	-0.440785	4.72854	0.412625	-0.372795	-0.0449093	-0.123341	0.658585	2	1.02668	-2.04562	Germany	Medap T 1500	Medap	Medap	PRK300	Incubator
1.29622	2.26841	2.21895	0.412625	-0.372795	-0.0449093	0.0226877	0.658585	2	1.87843	-1.36691	Australia	Parker Tc 500	Parker Healthcare Pty Ltd	Parker	PRK300	Incubator
-0.590655	-0.440785	-0.29063	0.412625	-0.372795	-0.0449093	-0.234916	0.658585	2	-0.106363	0.602993	Japan	Transcapsule V-707	Atom Medical Corp	Transcapsule	PRK341	Incubator
-0.455879	-0.440785	-0.29063	0.412625	-0.372795	-0.0449093	0.814659	0.658585	2	-0.106363	0.517038	USA	Air-Shields Ti500-1c	Draeger Medical Systems Inc	Air-Shields	PRK358	Incubator
-0.455879	-0.440785	-0.29063	0.412625	-0.372795	-0.0449093	-0.0712735	0.658585	2	-0.106363	0.517038	USA	Air-Shields Ti500-1c	Draeger Medical Systems Inc	Air-Shields	PRK358	Incubator
1.29622	-0.440785	-0.29063	0.412625	-0.372795	-0.0449093	-0.0288275	0.658585	2	-0.106363	-1.36579	USA	Isolette Ti500-1c	Hill-Rom Air Shields	Isolette	PRK358	Incubator
-0.455879	-0.440785	-0.29063	0.412625	-0.372795	-0.0449093	-0.305619	0.658585	2	-0.106363	0.48541	Japan	Transcapsule V-707	Atom Medical Corp	Transcapsule	PRK320	Incubator
0.757111	-0.440785	-0.29063	0.412625	-0.372795	-0.0449093	1.8157	0.658585	2	-0.106363	-0.729498	Brazil	Fanem It 158-Ts	Fanem Ltda	Fanem	PRK320	Incubator
0.083228	-0.440785	-0.29063	0.412625	-0.372795	-0.0449093	2.81355	0.658585	2	-0.106363	-0.142323	Japan	Atom Transcapsule V-707	Atom Medical Corp	Atom	PRK320	Incubator
-0.455879	-0.440785	-0.29063	0.412625	-0.372795	-0.0449093	-0.063484	0.658585	2	-0.106363	0.518155	Japan	Transcapsule V-707	Atom Medical Corp	Transcapsule	PRK320	Incubator
-0.455879	-0.440785	-0.29063	0.412625	-0.372795	-0.0449093	-0.164342	0.658585	2	-0.106363	0.518155	Japan	Transcapsule V-707	Atom Medical Corp	Transcapsule	PRK320	Incubator
0.218005	-0.440785	-0.29063	0.412625	-0.372795	-0.0449093	0.506231	0.658585	2	-0.106363	-0.194417	Brazil	Fanem It 158-Ts	Fanem Ltda	Fanem	PRK311	Incubator
-0.590655	-0.440785	-0.29063	0.412625	-0.372795	-0.0449093	-0.0647362	0.658585	2	-0.106363	0.534899	Japan	Transcapsule V-707	Atom Medical Corp	Transcapsule	PRK311	Incubator
-0.590655	-0.440785	-0.29063	0.412625	-0.372795	-0.0449093	-0.0974224	0.658585	2	-0.106363	0.533783	Japan	Transcapsule V-808	Atom Medical Internation Inc	Transcapsule	PRK340	Incubator
-0.455879	-0.440785	-0.29063	0.412625	-0.372795	-0.0449093	-0.190647	0.658585	2	-0.106363	0.517038	Japan	Transcapsule V-707	Atom Medical Corp	Transcapsule	PRK340	Incubator
-0.455879	-0.440785	-0.29063	0.412625	-0.372795	-0.0449093	0.954519	0.658585	2	-0.106363	0.517038	Japan	Transcapsule V-707	Atom Medical Corp	Transcapsule	PRK340	Incubator
-0.321102	2.26841	-0.29063	0.412625	-0.372795	-0.0449093	-0.316401	0.658585	2	-0.106363	0.334709	Argentina	Medix Tr-200	Medix Industrial Y Commercial Sa	Medix	PRK340	Incubator
-0.590655	-0.440785	-0.29063	0.412625	-0.372795	-0.0449093	-0.329448	0.658585	2	-0.106363	0.531922	Japan	Transcapsule V-707	Atom Medical Corp	Transcapsule	PRK350	Incubator
1.16144	-0.440785	2.21895	0.412625	-0.372795	-0.0449093	-0.324006	0.658585	2	-0.106363	-1.11611	USA	Hill-Rom T2500-1c	Hill-Rom Air Shields	Hill-Rom	PRK350	Incubator
1.29622	-0.440785	-0.29063	0.412625	-0.372795	-0.0449093	1.28345	0.658585	2	-0.106363	-1.36579	USA	Air-Shields Ti500-1c	Hill-Rom Air Shields	Air-Shields	PRK360	Incubator
0.891888	-0.440785	-0.29063	0.412625	-0.372795	-0.0449093	-0.297434	0.658585	2	-0.106363	-0.957967	USA	Isolette Ti500	Air-Shields Inc	Isolette	PRK360	Incubator
-0.590655	-0.440785	-0.29063	0.412625	-0.372795	-0.0449093	1.46825	0.658585	2	-0.106363	0.534155	Japan	Transcapsule V-707	Atom Medical Corp	Transcapsule	PRK360	Incubator
0.891888	-0.440785	-0.29063	0.412625	-0.372795	-0.0449093	-0.167288	0.658585	2	-0.106363	-0.957967	USA	Isolette Ti500	Hill-Rom Air Shields	Isolette	PRK360	Incubator
0.218005	-0.440785	-0.29063	0.412625	-0.372795	-0.0449093	0.309783	0.658585	2	-0.106363	-0.194045	Brazil	Fanem It 158-Ts	Fanem Ltda	Fanem	PRK360	Incubator
0.891888	-0.440785	-0.29063	-1.1749	-0.372795	-0.0449093	-0.330369	-1.51823	1	-0.106363	-0.932664	UK	Angenieux ALM	Angenieux	Angenieux	PRK312	Lights, Surgical
0.891888	-0.440785	-0.29063	-1.1749	-0.372795	-0.0449093	-0.330369	-1.51823	1	-0.106363	-0.932664	UK	Angenieux ALM	Angenieux	Angenieux	PRK312	Lights, Surgical
0.891888	-0.440785	-0.29063	-1.1749	-0.372795	-0.0449093	-0.330369	-1.51823	1	-0.106363	-0.932664	UK	Angenieux ALM	Angenieux	Angenieux	PRK312	Lights, Surgical
0.891888	-0.440785	-0.29063	-1.1749	-0.372795	-0.0449093	-0.330369	-1.51823	1	-0.106363	-0.932664	UK	Angenieux ALM	Angenieux	Angenieux	PRK312	Lights, Surgical
0.891888	-0.440785	-0.29063	-1.1749	-0.372795	-0.0449093	-0.330369	-1.51823	1	-0.106363	-0.932664	Switzerland	Derungs Hod 50	Derungs Licht AG	Derungs	PRK312	Lights, Surgical
0.891888	-0.440785	-0.29063	-1.1749	-0.372795	-0.0449093	-0.329448	-1.51823	1	-0.101678	-0.932664	Switzerland	Derungs Hod 50	Derungs Licht AG	Derungs	PRK312	Lights, Surgical
0.891888	-0.440785	-0.29063	-1.1749	-0.372795	-0.0449093	-0.330369	-1.51823	1	-0.106363	-0.845965	Switzerland	Derungs Hod 50	Derungs Licht AG	Derungs	PRK312	Lights, Surgical
0.891888	-0.440785	-0.29063	-1.1749	-0.372795	-0.0449093	-0.263155	-1.51823	1	-0.103284	-0.845965	Switzerland	Derungs Hod 50	Derungs Licht AG	Derungs	PRK312	Lights, Surgical
1.29622	-0.440785	-0.29063	-1.1749	-0.372795	-0.0449093	-0.326594	-1.51823	1	-0.0871536	-1.33528	Germany	Hanaulux	Heraeus GmbH	Hanaulux	PRK310	Lights, Surgical
1.29622	-0.440785	-0.29063	-1.1749	-0.372795	-0.0449093	-0.330369	-1.51823	1	-0.106363	-1.33528	Germany	Hanaulux	Heraeus GmbH	Hanaulux	PRK310	Lights, Surgical
1.29622	-0.440785	-0.29063	-1.1749	-0.372795	-0.0449093	-0.285897	-1.51823	1	-0.0852795	-1.33528	Germany	Hanaulux	Heraeus GmbH	Hanaulux	PRK310	Lights, Surgical
-0.186325	-0.440785	-0.29063	-1.1749	-0.372795	-0.0449093	-0.330369	-1.51823	1	-0.106363	0.149775	Germany	Sim.Led 5000	Simeon Medical Gmbh & Co Kg	Sim.Led	PRK310	Lights, Surgical
-0.186325	-0.440785	-0.29063	-1.1749	-0.372795	-0.0449093	-0.330369	-1.51823	1	-0.106363	0.149775	Germany	Sim.Led 5000	Simeon Medical Gmbh & Co Kg	Sim.Led	PRK310	Lights, Surgical
-1.12976	-0.440785	-0.29063	-1.1749	-0.372795	-0.0449093	-0.330369	-1.51823	1	-0.106363	1.15705	Germany	Marled E9i	Gebruder Martin GmbH & Co KG	Marled	PRK300	Lights, Surgical
-0.994985	-0.440785	-0.29063	-1.1749	-0.372795	-0.0449093	-0.330369	-1.51823	1	-0.106363	0.948674	Germany	Mach LED 3 Smart	Dr Mach GmbH & Co KG	Mach	PRK300	Lights, Surgical
0.622335	-0.440785	-0.29063	-1.1749	-0.372795	-0.0449093	-0.330369	-1.51823	1	-0.106363	-0.688194	Germany	Chromophare D650/D530 Plus	Berchtold GmbH & Co KG	Berchtold	PRK300	Lights, Surgical
-1.12976	-0.440785	-0.29063	-1.1749	-0.372795	-0.0449093	-0.330369	-1.51823	1	-0.106363	1.15705	Germany	Marled E9	Gebruder Martin GmbH & Co KG	Marled	PRK300	Lights, Surgical
0.218005	-0.440785	-0.29063	-1.1749	-0.372795	-0.0449093	-0.315085	-1.51823	1	-0.0277851	-0.281489	France	Alm Axl 5003	ALM SA	ALM	PRK300	Lights, Surgical
1.9701	-0.440785	-0.29063	-1.1749	-0.372795	-0.0449093	-0.0994388	-1.51823	1	1.34159	-2.03408	France	Angenieux AX14	ALM SA	Angenieux	PRK300	Lights, Surgical
0.218005	-0.440785	-0.29063	-1.1749	-0.372795	-0.0449093	-0.0761442	-1.51823	1	0.6946	-0.281489	UK	E650 & E550	Berchtold GmbH & Co KG	Berchtold	PRK300	Lights, Surgical
2.64398	-0.440785	-0.29063	-1.1749	-0.372795	-0.0449093	-0.323187	-1.51823	1	-0.0313986	-2.72693	Japan	Skylux Minor As-51156a	Yamada Shadowless Lamp Co Ltd	Skylux	PRK300	Lights, Surgical
-0.321102	-0.440785	-0.29063	-1.1749	-0.372795	-0.0449093	-0.064727	-1.51823	1	-0.106363	0.266615	Germany	Chromophare F628/F528	Berchtold GmbH & Ko KG	Chromophare	PRK300	Lights, Surgical
-0.0515487	-0.440785	-0.29063	-1.1749	-0.372795	-0.0449093	-0.205867	-1.51823	1	-0.106363	-0.010972	Germany	Trumpf Iled 3	Trumpf Medizin Systems Gmbh	Trumpf	PRK300	Lights, Surgical
-0.321102	-0.440785	-0.29063	-1.1749	-0.372795	-0.0449093	0.437194	-1.51823	1	-0.106363	0.266615	Germany	Berchtold F 528	Berchtold GmbH & Co KG	Berchtold	PRK300	Lights, Surgical
1.02666	-0.440785	4.72854	-1.1749	-0.372795	-0.0449093	-0.14554	-1.51823	1	1.65736	-1.09862	USA	Chromophare D650/D530 Plus	Berchtold GmbH & Co KG	Chromophare	PRK300	Lights, Surgical
1.16144	-0.440785	-0.29063	-1.1749	-0.372795	-0.0449093	-0.213444	-1.51823	1	0.222046	-1.1429	USA	Chromophare D650/D530 Plus	Berchtold GmbH & Co KG	Chromophare	PRK300	Lights, Surgical
1.9701	-0.440785	-0.29063	-1.1749	-0.372795	-0.0449093	0.996624	-1.51823	1	1.00446	-2.04227	France	Angenieux AX14	ALM SA	Angenieux	PRK300	Lights, Surgical
-0.321102	-0.440785	-0.29063	-1.1749	-0.372795	-0.0449093	-0.144472	-1.51823	1	-0.106363	0.268103	Germany	Trumpf Iled 3	Trumpf Medizin Systems Gmbh	Trumpf	PRK300	Lights, Surgical
1.43099	-0.440785	-0.29063	-1.1749	-0.372795	-0.0449093	-0.323555	-1.51823	1	-0.0456484	-1.40151	Germany	Mach 500/380	Dr Mach GmbH & Co KG	Mach	PRK300	Lights, Surgical
0.487558	-0.440785	2.21895	-1.1749	-0.372795	-0.0449093	0.285705	-1.51823	1	1.95199	-0.478702	Germany	Trumpf Iled 5	Trumpf Medizin Systems Gmbh	Trumpf	PRK300	Lights, Surgical
2.50921	-0.440785	-0.29063	-1.1749	-0.372795	-0.0449093	-0.190573	-1.51823	1	0.0800117	-2.48581	Germany	Mach 01662/01663	Dr Mach GmbH & Co KG	Mach	PRK300	Lights, Surgical
1.16144	-0.440785	-0.29063	-1.1749	-0.372795	-0.0449093	0.834971	-1.51823	1	0.0639095	-1.13769	Finland	Merilux X3	Merivaara Instrumentarium Corp	Merilux	PRK300	Lights, Surgical
1.70055	-0.440785	-0.29063	-1.1749	-0.372795	-0.0449093	0.0570312	-1.51823	1	0.0492762	-1.68468	Germany	Trigenflex 2561/R96	Dr Mach GmbH & Co KG	Trigenflex	PRK300	Lights, Surgical
-0.0515487	-0.440785	-0.29063	-1.1749	-0.372795	-0.0449093	-0.326686	-1.51823	1	-0.106363	-0.00501842	Germany	Trulight 3500	Trumpf Medizin Systeme Gmbh	Trulight	PRK300	Lights, Surgical
1.02666	-0.440785	-0.29063	-1.1749	-0.372795	-0.0449093	-0.0907839	-1.51823	1	1.31575	-0.995177	Germany	Mach 500/380	Dr Mach GmbH & Co KG	Mach	PRK300	Lights, Surgical
0.622335	-0.440785	4.72854	-1.1749	-0.372795	-0.0449093	-0.267924	-1.51823	1	0.190035	-0.69452	France	Angenieux 187026	ALM SA	Angenieux	PRK300	Lights, Surgical
0.622335	-0.440785	4.72854	-1.1749	-0.372795	-0.0449093	-0.188907	-1.51823	1	0.671087	-0.69452	France	Angenieux 187026	ALM SA	Angenieux	PRK300	Lights, Surgical
0.622335	-0.440785	4.72854	-1.1749	-0.372795	-0.0449093	-0.213223	-1.51823	1	0.420288	-0.69452	France	Angenieux 187026	ALM SA	Angenieux	PRK300	Lights, Surgical
0.622335	-0.440785	4.72854	-1.1749	-0.372795	-0.0449093	-0.204983	-1.51823	1	0.147861	-0.69452	France	Angenieux 187026	ALM SA	Angenieux	PRK300	Lights, Surgical
0.622335	-0.440785	4.72854	-1.1749	-0.372795	-0.0449093	-0.320231	-1.51823	1	-0.0626841	-0.69452	France	Angenieux 187026	ALM SA	Angenieux	PRK300	Lights, Surgical
0.622335	-0.440785	4.72854	-1.1749	-0.372795	-0.0449093	-0.298088	-1.51823	1	0.106443	-0.69452	France	Angenieux 187026	ALM SA	Angenieux	PRK300	Lights, Surgical
1.56577	-0.440785	4.72854	-1.1749	-0.372795	-0.0449093	-0.27158	-1.51823	1	0.221571	-1.60877	Germany	Quintaflex D-8017	Dr Mach GmbH & Co KG	Quintaflex	PRK300	Lights, Surgical
1.56577	-0.440785	4.72854	-1.1749	-0.372795	-0.0449093	-0.197645	-1.51823	1	1.06993	-1.64598	Germany	Hanaulux 2005ixl	Heraeus GmbH	Hanaulux	PRK300	Lights, Surgical
1.56577	-0.440785	4.72854	-1.1749	-0.372795	-0.0449093	-0.199302	-1.51823	1	0.586108	-1.60096	Germany	Hanaulux 2005	Heraeus GmbH	Hanaulux	PRK300	Lights, Surgical
1.16144	-0.440785	2.21895	-1.1749	-0.372795	-0.0449093	0.0840824	-1.51823	1	1.88436	-1.10606	Germany	Martin Ml701/Ml501	Gebruder Martin GmbH & Co KG	Martin	PRK300	Lights, Surgical
2.10488	-0.440785	4.72854	-1.1749	-0.372795	-0.0449093	-0.318464	-1.51823	1	-0.0359668	-2.07055	Japan	Hospilite H24501	Dai-Ichi Shomei Co Ltd	Hospilite	PRK300	Lights, Surgical
-1.12976	-0.440785	-0.29063	-1.1749	-0.372795	-0.0449093	-0.330369	-1.51823	1	-0.106363	1.14477	Germany	Mach LED M3 MC	Dr Mach GmbH & Co KG	Dr Mach	PRK358	Lights, Surgical
1.29622	-0.440785	4.72854	-1.1749	-0.372795	-0.0449093	0.293817	-1.51823	1	-0.106363	-1.36579	USA	Getinge Gcl 700	Getinge Inc	Getinge	PRK358	Lights, Surgical
1.29622	-0.440785	4.72854	-1.1749	-0.372795	-0.0449093	-0.183613	-1.51823	1	-0.106363	-1.36579	USA	Getinge Gcl 500	Getinge Inc	Getinge	PRK358	Lights, Surgical
1.29622	-0.440785	4.72854	-1.1749	-0.372795	-0.0449093	-0.281201	-1.51823	1	-0.106363	-1.36579	USA	Getinge Gcl 700	Getinge Inc	Getinge	PRK358	Lights, Surgical
-0.590655	-0.440785	-0.29063	-1.1749	-0.372795	-0.0449093	-0.327763	-1.51823	1	-0.106363	0.610063	Germany	Marled E9i	Gebruder Martin GmbH & Co KG	Marled	PRK358	Lights, Surgical
1.29622	-0.440785	4.72854	-1.1749	-0.372795	-0.0449093	-0.129878	-1.51823	1	-0.106363	-1.36579	USA	Getinge Gcl 500	Getinge Inc	Getinge	PRK358	Lights, Surgical
2.10488	-0.440785	-0.29063	-1.1749	-0.372795	-0.0449093	-0.139058	-1.51823	1	-0.106363	-2.18441	France	Angenieux AX14	ALM SA	Angenieux	PRK320	Lights, Surgical
2.10488	-0.440785	-0.29063	-1.1749	-0.372795	-0.0449093	-0.11139	-1.51823	1	-0.106363	-2.18441	France	Angenieux AX 4	ALM SA	Angenieux	PRK320	Lights, Surgical
0.083228	2.26841	-0.29063	-1.1749	-0.372795	-0.0449093	0.964629	-1.51823	1	-0.106363	-0.0466936	UK	Eschmann Le1350e2	Eschmann Brothers & Walsh Ltd	Eschmann	PRK320	Lights, Surgical
1.9701	-0.440785	-0.29063	-1.1749	-0.372795	-0.0449093	-0.088703	-1.51823	1	-0.106363	-2.0512	UK	Brandon Bml480	Brandon Medical	Brandon	PRK311	Lights, Surgical
1.9701	-0.440785	-0.29063	-1.1749	-0.372795	-0.0449093	0.0306521	-1.51823	1	-0.106363	-2.0512	UK	Brandon Bml480	Brandon Medical	Brandon	PRK311	Lights, Surgical
2.10488	-0.440785	-0.29063	-1.1749	-0.372795	-0.0449093	-0.219751	-1.51823	1	-0.106363	-2.16878	UK	Brandon Bml480	Brandon Medical	Brandon	PRK311	Lights, Surgical
1.9701	-0.440785	2.21895	-1.1749	-0.372795	-0.0449093	-0.0367459	-1.51823	1	-0.106363	-2.0512	Germany	Heraeus 56067601	Heraeus GmbH	Heraeus	PRK311	Lights, Surgical
1.70055	-0.440785	-0.29063	-1.1749	-0.372795	-0.0449093	-0.327146	-1.51823	1	-0.106363	-1.77026	Japan	Hospilite H24501	Dai-Ichi Shomei Co Ltd	Hospilite	PRK340	Lights, Surgical
-0.590655	-0.440785	-0.29063	-1.1749	-0.372795	-0.0449093	-0.330369	-1.51823	1	-0.106363	0.595179	Germany	Trulight 1000	Trumpf Medizin Systems Gmbh	Trulight	PRK340	Lights, Surgical
-0.455879	-0.440785	-0.29063	-1.1749	-0.372795	-0.0449093	-0.314256	-1.51823	1	-0.106363	0.456386	Germany	Trumpf Iled 3 Alc+/Slc	Trumpf Medizin Systems Gmbh	Trumpf	PRK340	Lights, Surgical
-0.455879	-0.440785	-0.29063	-1.1749	-0.372795	-0.0449093	-0.330369	-1.51823	1	-0.106363	0.456386	Germany	Trumpf Iled 3 Alc+/Slc	Trumpf Medizin Systems Gmbh	Trumpf	PRK340	Lights, Surgical
-0.455879	-0.440785	-0.29063	-1.1749	-0.372795	-0.0449093	-0.330369	-1.51823	1	-0.106363	0.456386	Germany	Trumpf Iled 3 Alc+/Slc	Trumpf Medizin Systems Gmbh	Trumpf	PRK340	Lights, Surgical
-0.455879	-0.440785	-0.29063	-1.1749	-0.372795	-0.0449093	-0.330369	-1.51823	1	-0.106363	0.456386	Germany	Trumpf Iled 3 Alc+/Slc	Trumpf Medizin Systems Gmbh	Trumpf	PRK340	Lights, Surgical
-0.455879	-0.440785	-0.29063	-1.1749	-0.372795	-0.0449093	-0.330369	-1.51823	1	-0.106363	0.456386	Germany	Trumpf Iled 3 Alc+/Slc	Trumpf Medizin Systems Gmbh	Trumpf	PRK340	Lights, Surgical
-0.455879	-0.440785	-0.29063	-1.1749	-0.372795	-0.0449093	-0.330369	-1.51823	1	-0.106363	0.456386	Germany	Trumpf Iled 3 Alc+/Slc	Trumpf Medizin Systems Gmbh	Trumpf	PRK340	Lights, Surgical
-0.455879	-0.440785	-0.29063	-1.1749	-0.372795	-0.0449093	-0.330369	-1.51823	1	-0.106363	0.456386	Germany	Trumpf Iled 3 Alc+/Slc	Trumpf Medizin Systems Gmbh	Trumpf	PRK340	Lights, Surgical
-0.455879	-0.440785	-0.29063	-1.1749	-0.372795	-0.0449093	-0.330369	-1.51823	1	-0.106363	0.456386	Germany	Trumpf Iled 3 Alc+/Slc	Trumpf Medizin Systems Gmbh	Trumpf	PRK340	Lights, Surgical
-0.455879	-0.440785	-0.29063	-1.1749	-0.372795	-0.0449093	-0.330369	-1.51823	1	-0.106363	0.456386	Germany	Trumpf Iled 3 Alc+/Slc	Trumpf Medizin Systems Gmbh	Trumpf	PRK340	Lights, Surgical
-0.455879	-0.440785	-0.29063	-1.1749	-0.372795	-0.0449093	-0.330369	-1.51823	1	-0.106363	0.456386	Germany	Trumpf Iled 3 Alc+/Slc	Trumpf Medizin Systems Gmbh	Trumpf	PRK340	Lights, Surgical
-0.455879	-0.440785	-0.29063	-1.1749	-0.372795	-0.0449093	-0.330369	-1.51823	1	-0.106363	0.456386	Germany	Trumpf Iled 3 Alc+/Slc	Trumpf Medizin Systems Gmbh	Trumpf	PRK340	Lights, Surgical
-0.455879	-0.440785	-0.29063	-1.1749	-0.372795	-0.0449093	-0.330369	-1.51823	1	-0.106363	0.456386	Germany	Trumpf Iled 3 Alc+/Slc	Trumpf Medizin Systems Gmbh	Trumpf	PRK340	Lights, Surgical
-0.455879	-0.440785	-0.29063	-1.1749	-0.372795	-0.0449093	-0.328527	-1.51823	1	-0.106363	0.456386	Germany	Trulight 1000	Trumpf Medizin Systems Gmbh	Trulight	PRK340	Lights, Surgical
-0.455879	-0.440785	-0.29063	-1.1749	-0.372795	-0.0449093	-0.322082	-1.51823	1	-0.106363	0.456386	Germany	Trulight 1000	Trumpf Medizin Systems Gmbh	Trulight	PRK340	Lights, Surgical
0.487558	-0.440785	-0.29063	-1.1749	-0.372795	-0.0449093	0.22559	-1.51823	1	-0.106363	-0.458237	Finland	Merilux X5	Merivaara Instrumentarium Corp	Merilux	PRK340	Lights, Surgical
-0.455879	-0.440785	-0.29063	-1.1749	-0.372795	-0.0449093	-0.330369	-1.51823	1	-0.106363	0.456386	Germany	Trumpf Iled 3 Alc+/Slc	Trumpf Medizin Systems Gmbh	Trumpf	PRK340	Lights, Surgical
-0.455879	-0.440785	-0.29063	-1.1749	-0.372795	-0.0449093	-0.330369	-1.51823	1	-0.106363	0.456386	Germany	Trumpf Iled 3 Alc+/Slc	Trumpf Medizin Systems Gmbh	Trumpf	PRK340	Lights, Surgical
-0.455879	-0.440785	-0.29063	-1.1749	-0.372795	-0.0449093	-0.330369	-1.51823	1	-0.106363	0.456386	Germany	Trumpf Iled 3 Alc+/Slc	Trumpf Medizin Systems Gmbh	Trumpf	PRK340	Lights, Surgical
-0.455879	-0.440785	-0.29063	-1.1749	-0.372795	-0.0449093	-0.330369	-1.51823	1	-0.106363	0.456386	Germany	Trumpf Iled 3 Alc+/Slc	Trumpf Medizin Systems Gmbh	Trumpf	PRK340	Lights, Surgical
-0.455879	-0.440785	-0.29063	-1.1749	-0.372795	-0.0449093	-0.330369	-1.51823	1	-0.106363	0.456386	Germany	Trumpf Iled 3 Alc+/Slc	Trumpf Medizin Systems Gmbh	Trumpf	PRK340	Lights, Surgical
-0.455879	-0.440785	-0.29063	-1.1749	-0.372795	-0.0449093	-0.330369	-1.51823	1	-0.106363	0.456386	Germany	Trumpf Iled 3 Alc+/Slc	Trumpf Medizin Systems Gmbh	Trumpf	PRK340	Lights, Surgical
-0.455879	-0.440785	-0.29063	-1.1749	-0.372795	-0.0449093	-0.325535	-1.51823	1	-0.106363	0.456386	Germany	Trumpf Iled 3 Alc+/Slc	Trumpf Medizin Systems Gmbh	Trumpf	PRK340	Lights, Surgical
1.43099	-0.440785	-0.29063	-1.1749	-0.372795	-0.0449093	-0.0348399	-1.51823	1	-0.106363	-1.49975	Germany	Hanaulux 2005	Heraeus GmbH	Hanaulux	PRK340	Lights, Surgical
0.218005	-0.440785	-0.29063	-1.1749	-0.372795	-0.0449093	0.919135	-1.51823	1	-0.106363	-0.171719	Germany	Mach M5/Mach M3	Dr Mach GmbH & Co KG	Mach	PRK340	Lights, Surgical
0.083228	-0.440785	-0.29063	-1.1749	-0.372795	-0.0449093	-0.305656	-1.51823	1	-0.106363	-0.0478099	Germany	Mach LED 3 SC	Dr Mach GmbH & Co KG	Mach	PRK340	Lights, Surgical
2.10488	-0.440785	4.72854	-1.1749	-0.372795	-0.0449093	-0.307065	-1.51823	1	-0.106363	-2.1219	Japan	Skylux Bd-844	Yamada Shadowless Lamp Co Ltd	Skylux	PRK340	Lights, Surgical
-1.12976	-0.440785	-0.29063	-1.1749	-0.372795	-0.0449093	-0.330369	-1.51823	1	-0.106363	1.11761	Germany	Marled E15	Gebruder Martin GmbH & Co KG	Marled	PRK360	Lights, Surgical
-1.12976	-0.440785	-0.29063	-1.1749	-0.372795	-0.0449093	-0.330369	-1.51823	1	-0.106363	1.16486	Germany	Marled E15	Gebruder Martin GmbH & Co KG	Marled	PRK360	Lights, Surgical
-0.590655	-0.440785	-0.29063	-1.1749	-0.372795	-0.0449093	-0.327533	-1.51823	1	-0.106363	0.526341	China	Smic L734-Ii	Shanghai Medical Instruments Co Ltd	Smic	PRK360	Lights, Surgical
-0.590655	-0.440785	-0.29063	-1.1749	-0.372795	-0.0449093	1.81833	-1.51823	1	-0.106363	0.526341	China	Smic L734-Ii	Shanghai Medical Instruments Co Ltd	Smic	PRK360	Lights, Surgical
-0.186325	-0.440785	-0.29063	-1.1749	-0.372795	-0.0449093	1.88668	-1.51823	1	-0.106363	0.133403	UK	Gled 54c	Brandon Medical Ltd	Gled	PRK360	Lights, Surgical
-0.0515487	-0.440785	-0.29063	-1.1749	-0.372795	-0.0449093	0.114531	-1.51823	1	-0.106363	0.000190986	UK	Eschmann Le1350e2	Eschmann Bros & Walsh Ltd	Eschmann	PRK360	Lights, Surgical
-0.0515487	-0.440785	-0.29063	-1.1749	-0.372795	-0.0449093	-0.307	-1.51823	1	-0.106363	0.000190986	UK	Eschmann Le1350e2	Eschmann Bros & Walsh Ltd	Eschmann	PRK360	Lights, Surgical
0.083228	-0.440785	-0.29063	-1.1749	-0.372795	-0.0449093	-0.317552	-1.51823	1	-0.106363	-0.0195303	Germany	Mach M2f	Dr Mach GmbH & Co KG	Mach	PRK360	Lights, Surgical
-0.186325	-0.440785	4.72854	-1.1749	-0.372795	-0.0449093	0.129143	-1.51823	2	-0.106363	0.225312	USA	Medigroup Fs-300	Medigroup Inc	Medigroup	PRK300	Laparoscopes
-0.186325	-0.440785	4.72854	-1.1749	-0.372795	-0.0449093	1.12805	-1.51823	2	-0.106363	0.225312	USA	Medigroup Fs-300	Medigroup Inc	Medigroup	PRK300	Laparoscopes
-0.725432	-0.440785	-0.29063	-1.1749	-0.372795	-0.0449093	-0.330369	-1.51823	2	-0.106363	0.776764	Germany	Erbe Eip 2	Erbe Elektromedizin GmbH	Erbe	PRK340	Laparoscopes
0.218005	-0.440785	2.21895	-1.1749	4.83955	22.2645	9.50304	-1.51823	2	19.6598	-0.285954	USA	Senographe Essential	GE Healthcare	Senographe	PRK300	Radiographic System
1.29622	-0.440785	-0.29063	-1.1749	4.83955	22.2645	0.407887	-1.51823	2	-0.106363	-1.35723	Germany	Mammomat 3000 Nova	Siemens AG	Mammomat	PRK358	Radiographic System
0.218005	-0.440785	2.21895	-1.1749	4.83955	22.2645	1.97129	-1.51823	2	-0.106363	-0.242046	Germany	Mammomat Inspiration	Siemens AG	Mammomat	PRK320	Radiographic System
0.218005	-0.440785	4.72854	-1.1749	4.83955	22.2645	1.66562	-1.51823	2	-0.106363	-0.280373	USA	Senographe Essential	GE Healthcare	Senographe	PRK340	Radiographic System
0.622335	-0.440785	-0.29063	-1.1749	4.83955	22.2645	0.93453	-1.51823	2	-0.106363	-0.604472	Germany	Mammomat 3000 Nova	Siemens AG	Mammomat	PRK360	Radiographic System
-0.725432	-0.440785	-0.29063	-1.1749	-0.372795	-0.0449093	-0.330369	-1.51823	2	-0.106363	0.782718	USA	Microstar Om100	Ecleris Srl	Ecleris	PRK330	Microscopes, Light, Operating
-0.455879	-0.440785	-0.29063	-1.1749	-0.372795	-0.0449093	-0.315922	-1.51823	2	-0.106363	0.398338	Germany	Zeiss Opmi Lumera T	Carl Zeiss Meditec AG	Zeiss	PRK300	Microscopes, Light, Operating
-0.0515487	-0.440785	-0.29063	-1.1749	-0.372795	-0.0449093	-0.277159	-1.51823	2	-0.106363	0.0794483	Germany	Zeiss Opmi Lumera T	Carl Zeiss Meditec AG	Zeiss	PRK300	Microscopes, Light, Operating
1.9701	-0.440785	2.21895	-1.1749	-0.372795	-0.0449093	-0.289856	-1.51823	2	0.120419	-1.97454	Germany	Opmi 6-Sdfc Xy	Carl Zeiss	Opmi	PRK300	Microscopes, Light, Operating
1.70055	-0.440785	4.72854	-1.1749	-0.372795	-0.0449093	-0.289396	-1.51823	2	0.255092	-1.76877	Germany	Opmi Mdu-Xy	Carl Zeiss Meditec Inc	Opmi	PRK300	Microscopes, Light, Operating
2.23965	-0.440785	-0.29063	-1.1749	-0.372795	-0.0449093	-0.0713195	-1.51823	2	0.514532	-2.30869	Germany	Opmi 111	Carl Zeiss	Opmi	PRK300	Microscopes, Light, Operating
1.70055	-0.440785	-0.29063	-1.1749	-0.372795	-0.0449093	-0.329282	-1.51823	2	-0.0969927	-1.77808	Germany	Opmi-Cs	Carl Zeiss	Opmi	PRK300	Microscopes, Light, Operating
1.70055	-0.440785	-0.29063	-1.1749	-0.372795	-0.0449093	0.458546	-1.51823	2	0.173436	-1.77808	Germany	Superlux 301	Carl Zeiss	Superlux	PRK300	Microscopes, Light, Operating
2.23965	-0.440785	-0.29063	-1.1749	-0.372795	-0.0449093	2.43092	-1.51823	2	0.741235	-2.32432	Germany	Leica Wild M680	Leica Microsystems AG	Leica	PRK300	Microscopes, Light, Operating
0.352781	-0.440785	-0.29063	-1.1749	-0.372795	-0.0449093	0.376996	-1.51823	2	0.99851	-0.303443	Germany	Zeiss Opmi Vario Onn S88	Carl Zeiss Meditec AG	Zeiss	PRK300	Microscopes, Light, Operating
-0.321102	-0.440785	-0.29063	-1.1749	-0.372795	-0.0449093	2.02925	-1.51823	2	-0.106363	0.386059	Germany	Leica M525 F50	Leica Microsystems AG	Leica	PRK300	Microscopes, Light, Operating
0.757111	-0.440785	-0.29063	-1.1749	-0.372795	-0.0449093	0.142199	-1.51823	2	-0.029056	-0.772661	Germany	Opmi Neuro/Nc4	Carl Zeiss Meditec Inc	Opmi	PRK300	Microscopes, Light, Operating
2.10488	-0.440785	-0.29063	-1.1749	-0.372795	-0.0449093	-0.252014	-1.51823	2	0.092447	-2.11669	Germany	Zeiss Opmi 1	Carl Zeiss Meditec AG	Zeiss	PRK300	Microscopes, Light, Operating
-0.590655	-0.440785	-0.29063	-1.1749	-0.372795	-0.0449093	-0.330369	-1.51823	2	-0.106363	0.64839	Germany	Leica M525 F40	Leica Microsystems AG	Leica	PRK300	Microscopes, Light, Operating
-0.0515487	-0.440785	-0.29063	-1.1749	-0.372795	-0.0449093	-0.126481	-1.51823	2	-0.106363	-0.014693	Germany	Opmi Visu 160 / S7	Carl Zeiss Meditec Inc	Opmi	PRK300	Microscopes, Light, Operating
0.757111	-0.440785	-0.29063	-1.1749	-0.372795	-0.0449093	1.23291	-1.51823	2	1.09489	-0.724288	Germany	Karl Kaps Som 62	Karl Kaps Gmbh & Co Kg	Karl Kaps	PRK300	Microscopes, Light, Operating
1.29622	2.26841	-0.29063	-1.1749	-0.372795	-0.0449093	1.98265	-1.51823	2	1.93035	-1.25676	Germany	Leica M500	Leica Microsystems AG	Leica	PRK300	Microscopes, Light, Operating
1.29622	-0.440785	-0.29063	-1.1749	-0.372795	-0.0449093	-0.317727	-1.51823	2	-0.106363	-1.25676	Germany	Leica M300	Leica Microsystems AG	Leica	PRK358	Microscopes, Light, Operating
0.757111	-0.440785	-0.29063	-1.1749	-0.372795	-0.0449093	-0.323924	-1.51823	2	-0.106363	-0.707544	Germany	Leica M501	Leica Microsystems AG	Leica	PRK358	Microscopes, Light, Operating
1.29622	2.26841	-0.29063	-1.1749	-0.372795	-0.0449093	3.47264	-1.51823	2	-0.106363	-1.26979	Germany	Leica M500	Leica Microsystems AG	Leica	PRK320	Microscopes, Light, Operating
-0.590655	-0.440785	-0.29063	-1.1749	-0.372795	-0.0449093	-0.330369	-1.51823	2	-0.106363	0.617505	Germany	Opmi Vario / S88	Carl Zeiss Meditec AG	Carl Zeiss	PRK340	Microscopes, Light, Operating
1.16144	-0.440785	-0.29063	-1.1749	-0.372795	-0.0449093	0.409038	-1.51823	2	-0.106363	-1.22067	Germany	Zeiss Opmi Pico	Carl Zeiss Meditec AG	Zeiss	PRK340	Microscopes, Light, Operating
1.70055	-0.440785	-0.29063	-1.1749	-0.372795	-0.0449093	-0.31049	-1.51823	2	-0.106363	-1.6631	Germany	Carl Zeiss 280894	Carl Zeiss	Carl Zeiss	PRK340	Microscopes, Light, Operating
-0.455879	-0.440785	-0.29063	-1.1749	-0.372795	-0.0449093	-0.326612	-1.51823	2	-0.106363	0.523364	Germany	Zeiss Opmi Lumera T	Carl Zeiss Meditec AG	Zeiss	PRK340	Microscopes, Light, Operating
0.083228	-0.440785	-0.29063	-1.1749	-0.372795	-0.0449093	-0.327293	-1.51823	2	-0.106363	-0.022135	Germany	Opmi Visu 160 / S7	Carl Zeiss Meditec Inc	Opmi	PRK340	Microscopes, Light, Operating
0.757111	-0.440785	-0.29063	-1.1749	-0.372795	-0.0449093	-0.250099	-1.51823	2	-0.106363	-0.712753	Germany	Leica M501	Leica Microsystems AG	Leica	PRK340	Microscopes, Light, Operating
-0.590655	-0.440785	-0.29063	-1.1749	-0.372795	-0.0449093	-0.329374	-1.51823	2	-0.106363	0.631273	Germany	Zeiss Opmi Lumera T	Carl Zeiss Meditec AG	Zeiss	PRK340	Microscopes, Light, Operating
2.23965	-0.440785	-0.29063	-1.1749	-0.372795	-0.0449093	-0.318105	-1.51823	2	-0.106363	-2.3113	Germany	Opmi 111/S21	Carl Zeiss	Opmi	PRK340	Microscopes, Light, Operating
2.10488	-0.440785	4.72854	-1.1749	-0.372795	-0.0449093	-0.293466	-1.51823	2	-0.106363	-2.08059	Germany	Stativ S3	Carl Zeiss	Stativ	PRK340	Microscopes, Light, Operating
1.16144	-0.440785	-0.29063	-1.1749	-0.372795	-0.0449093	0.263635	-1.51823	2	-0.106363	-1.13844	Germany	Opmi Visu 150	Carl Zeiss	Opmi	PRK360	Microscopes, Light, Operating
1.43099	-0.440785	-0.29063	-1.1749	-0.372795	-0.0449093	-0.0362763	-1.51823	2	-0.106363	-1.44951	Germany	Leica M651	Leica Microsystems AG	Leica	PRK360	Microscopes, Light, Operating
0.891888	-0.440785	-0.29063	-1.1749	-0.372795	-0.0449093	-0.319476	-1.51823	2	-0.106363	-0.961316	Germany	Atmos Kaps	Atmos MedizinTechnik GmbH & Co KG	Atmos	PRK360	Microscopes, Light, Operating
-0.590655	-0.440785	-0.29063	-1.1749	-0.372795	-0.0449093	-0.330369	-1.51823	2	-0.106363	0.648762	Germany	Zeiss Opmi Vario Onn S88	Carl Zeiss Meditec AG	Zeiss	PRK360	Microscopes, Light, Operating
0.487558	-0.440785	-0.29063	-1.1749	-0.372795	-0.0449093	-0.323261	-1.51823	2	-0.0689647	-0.551262	UK	Graseby MR10	Smiths Group Plc	Graseby	PRK333	Apnea Monitors
0.487558	-0.440785	-0.29063	-1.1749	-0.372795	-0.0449093	-0.324237	-1.51823	2	-0.0897088	-0.551262	UK	Graseby MR10	Smiths Group Plc	Graseby	PRK333	Apnea Monitors
-0.994985	-0.440785	-0.29063	-1.1749	-0.372795	-0.0449093	-0.330369	-1.51823	2	-0.106363	1.05323	Germany	Siss Babycontrol	Schulte Elektronik GmbH	Siss Babycontrol	PRK300	Apnea Monitors
-1.12976	-0.440785	-0.29063	-1.1749	-0.372795	-0.0449093	-0.330369	-1.51823	2	-0.106363	1.06923	Germany	Siss Babycontrol	Schulte Elektronik GmbH	Siss Babycontrol	PRK300	Apnea Monitors
-1.12976	-0.440785	-0.29063	-1.1749	-0.372795	-0.0449093	-0.330369	-1.51823	2	-0.106363	1.06923	Germany	Siss Babycontrol	Schulte Elektronik GmbH	Siss Babycontrol	PRK300	Apnea Monitors
-0.994985	-0.440785	-0.29063	-1.1749	-0.372795	-0.0449093	-0.290436	-1.51823	2	-0.106363	1.05323	Germany	Siss Babycontrol	Schulte Elektronik GmbH	Siss Babycontrol	PRK300	Apnea Monitors
-0.994985	-0.440785	-0.29063	-1.1749	-0.372795	-0.0449093	-0.21919	-1.51823	2	-0.106363	1.05323	Germany	Siss Babycontrol	Schulte Elektronik GmbH	Siss Babycontrol	PRK300	Apnea Monitors
-0.590655	2.26841	-0.29063	-1.1749	-0.372795	-0.0449093	-0.234805	-1.51823	2	-0.106363	0.531178	UK	Graseby MR10	Graseby Medical Ltd	Graseby	PRK300	Apnea Monitors
-0.590655	2.26841	-0.29063	-1.1749	-0.372795	-0.0449093	1.66464	-1.51823	2	-0.106363	0.531178	UK	Graseby MR10	Graseby Medical Ltd	Graseby	PRK300	Apnea Monitors
0.218005	2.26841	-0.29063	-1.1749	-0.372795	-0.0449093	-0.274572	-1.51823	2	-0.0459113	-0.220837	UK	Graseby MR10	Graseby Medical Ltd	Graseby	PRK300	Apnea Monitors
0.218005	2.26841	-0.29063	-1.1749	-0.372795	-0.0449093	-0.323463	-1.51823	2	-0.0655515	-0.220837	UK	Graseby MR10	Graseby Medical Ltd	Graseby	PRK300	Apnea Monitors
0.218005	2.26841	-0.29063	-1.1749	-0.372795	-0.0449093	-0.327607	-1.51823	2	-0.0914992	-0.28	UK	Graseby MR10	Graseby Medical Ltd	Graseby	PRK300	Apnea Monitors
0.757111	2.26841	-0.29063	-1.1749	-0.372795	-0.0449093	-0.317478	-1.51823	2	-0.0247209	-0.708288	UK	Graseby MR10	Graseby Medical Ltd	Graseby	PRK300	Apnea Monitors
2.50921	2.26841	-0.29063	-1.1749	-0.372795	-0.0449093	-0.320931	-1.51823	2	-0.0525293	-2.51297	UK	Graseby MR10	Graseby Medical Ltd	Graseby	PRK300	Apnea Monitors
2.50921	2.26841	4.72854	-1.1749	-0.372795	-0.0449093	-0.316466	-1.51823	2	-0.0103617	-2.51297	UK	Graseby MR10	Graseby Medical Ltd	Graseby	PRK300	Apnea Monitors
2.37443	2.26841	-0.29063	-1.1749	-0.372795	-0.0449093	-0.314468	-1.51823	2	-0.0558576	-2.398	UK	Graseby MR10	Graseby Medical Ltd	Graseby	PRK300	Apnea Monitors
1.56577	2.26841	-0.29063	-1.1749	-0.372795	-0.0449093	-0.306816	-1.51823	2	0.0628711	-1.56412	UK	Graseby MR10	Graseby Medical Ltd	Graseby	PRK300	Apnea Monitors
0.757111	2.26841	-0.29063	-1.1749	-0.372795	-0.0449093	-0.314256	-1.51823	2	-0.0154687	-0.708288	UK	Graseby MR10	Graseby Medical Ltd	Graseby	PRK300	Apnea Monitors
0.622335	2.26841	-0.29063	-1.1749	-0.372795	-0.0449093	-0.320931	-1.51823	2	-0.0320423	-0.660659	UK	Graseby MR10	Graseby Medical Ltd	Graseby	PRK300	Apnea Monitors
-0.590655	2.26841	-0.29063	-1.1749	-0.372795	-0.0449093	-0.327063	-1.51823	2	-0.106363	0.531178	UK	Graseby MR10	Graseby Medical Ltd	Graseby	PRK300	Apnea Monitors
1.56577	2.26841	4.72854	-1.1749	-0.372795	-0.0449093	-0.317755	-1.51823	2	-0.0247496	-1.56412	UK	Graseby MR10	Graseby Medical Ltd	Graseby	PRK300	Apnea Monitors
2.23965	2.26841	4.72854	-1.1749	-0.372795	-0.0449093	-0.305233	-1.51823	2	0.0313842	-2.24171	UK	Graseby MR10	Graseby Medical Ltd	Graseby	PRK300	Apnea Monitors
1.56577	2.26841	2.21895	-1.1749	-0.372795	-0.0449093	-0.313105	-1.51823	2	0.0138554	-1.56412	UK	Graseby MR10	Graseby Medical Ltd	Graseby	PRK300	Apnea Monitors
-0.590655	-0.440785	-0.29063	-1.1749	-0.372795	-0.0449093	-0.330369	-1.51823	2	-0.106363	0.594063	India	Nice 5050	Nice Neotech Medical Systems Pvt Ltd	Nice	PRK358	Apnea Monitors
-0.590655	-0.440785	-0.29063	-1.1749	-0.372795	-0.0449093	-0.290924	-1.51823	2	-0.106363	0.594063	India	Nice 5050	Nice Neotech Medical Systems Pvt Ltd	Nice	PRK358	Apnea Monitors
-0.590655	-0.440785	-0.29063	-1.1749	-0.372795	-0.0449093	-0.322616	-1.51823	2	-0.106363	0.594063	India	Nice 5050	Nice Neotech Medical Systems Pvt Ltd	Nice	PRK358	Apnea Monitors
-0.590655	-0.440785	-0.29063	-1.1749	-0.372795	-0.0449093	-0.330369	-1.51823	2	-0.106363	0.594063	India	Nice 5050	Nice Neotech Medical Systems Pvt Ltd	Nice	PRK358	Apnea Monitors
1.29622	2.26841	-0.29063	-1.1749	-0.372795	-0.0449093	-0.274434	-1.51823	2	-0.106363	-1.36579	UK	Graseby MR10	Graseby Medical Ltd	Graseby	PRK358	Apnea Monitors
1.29622	2.26841	-0.29063	-1.1749	-0.372795	-0.0449093	-0.241748	-1.51823	2	-0.106363	-1.36579	UK	Graseby MR10	Graseby Medical Ltd	Graseby	PRK358	Apnea Monitors
1.29622	2.26841	-0.29063	-1.1749	-0.372795	-0.0449093	-0.315793	-1.51823	2	-0.106363	-1.36579	UK	Graseby MR10	Graseby Medical Ltd	Graseby	PRK358	Apnea Monitors
1.29622	2.26841	2.21895	-1.1749	-0.372795	-0.0449093	-0.315536	-1.51823	2	-0.106363	-1.36579	UK	Graseby MR10	Graseby Medical Ltd	Graseby	PRK358	Apnea Monitors
-0.455879	-0.440785	-0.29063	-1.1749	-0.372795	-0.0449093	-0.330369	-1.51823	2	-0.106363	0.524108	China	Babyguard Infant Smart Mat	Ibabyguard International Pte Ltd	Babyguard	PRK320	Apnea Monitors
-0.455879	-0.440785	-0.29063	-1.1749	-0.372795	-0.0449093	-0.330369	-1.51823	2	-0.106363	0.524108	China	Babyguard Infant Smart Mat	Ibabyguard International Pte Ltd	Babyguard	PRK320	Apnea Monitors
1.29622	2.26841	2.21895	-1.1749	-0.372795	-0.0449093	-0.320904	-1.51823	2	-0.106363	-1.2936	UK	Graseby MR10	Graseby Medical Ltd	Graseby	PRK320	Apnea Monitors
0.218005	2.26841	-0.29063	-1.1749	-0.372795	-0.0449093	-0.197239	-1.51823	2	-0.106363	-0.164277	UK	Graseby MR10	Graseby Medical Ltd	Graseby	PRK340	Apnea Monitors
0.218005	2.26841	-0.29063	-1.1749	-0.372795	-0.0449093	-0.325609	-1.51823	2	-0.106363	-0.164277	UK	Graseby MR10	Graseby Medical Ltd	Graseby	PRK340	Apnea Monitors
0.218005	2.26841	-0.29063	-1.1749	-0.372795	-0.0449093	-0.320618	-1.51823	2	-0.106363	-0.164277	UK	Graseby MR10	Graseby Medical Ltd	Graseby	PRK340	Apnea Monitors
-0.455879	-0.440785	-0.29063	-1.1749	-0.372795	-0.0449093	-0.330369	-1.51823	2	-0.106363	0.523364	China	Babyguard Infant Smart Mat	Ibabyguard International Pte Ltd	Babyguard	PRK360	Apnea Monitors
-0.455879	2.26841	-0.29063	-1.1749	-0.372795	-0.0449093	-0.274683	-1.51823	2	-0.106363	0.50848	UK	Graseby MR10	Graseby Medical Ltd	Graseby	PRK360	Apnea Monitors
-0.455879	2.26841	-0.29063	-1.1749	-0.372795	-0.0449093	-0.283365	-1.51823	2	-0.106363	0.50848	UK	Graseby MR10	Graseby Medical Ltd	Graseby	PRK360	Apnea Monitors
-0.455879	2.26841	2.21895	-1.1749	-0.372795	-0.0449093	0.326365	-1.51823	2	-0.106363	0.50848	UK	Graseby MR10	Graseby Medical Ltd	Graseby	PRK360	Apnea Monitors
1.43099	2.26841	2.21895	-1.1749	-0.372795	-0.0449093	-0.317966	-1.51823	2	-0.106363	-1.37993	UK	Graseby MR10	Graseby Medical Ltd	Graseby	PRK360	Apnea Monitors
1.43099	2.26841	-0.29063	-1.1749	-0.372795	-0.0449093	-0.26577	-1.51823	2	-0.106363	-1.37993	UK	Graseby MR10	Graseby Medical Ltd	Graseby	PRK360	Apnea Monitors
-0.994985	-0.440785	-0.29063	-1.1749	-0.372795	-0.0449093	-0.330369	0.658585	2	-0.104328	1.0484	China	Contec Cms6500	Contec Medical Systems Co Ltd	Contec	PRK312	Physiologic Monitoring System
-0.994985	-0.440785	-0.29063	-1.1749	-0.372795	-0.0449093	-0.32942	0.658585	2	-0.103197	1.0484	China	Contec Cms6500	Contec Medical Systems Co Ltd	Contec	PRK312	Physiologic Monitoring System
0.352781	-0.440785	-0.29063	-1.1749	-0.372795	-0.0449093	-0.308133	0.658585	2	-0.0282396	-0.423631	USA	Dinamap Pro 300	GE Healthcare	Dinamap	PRK312	Physiologic Monitoring System
0.352781	-0.440785	-0.29063	-1.1749	-0.372795	-0.0449093	0.00531339	0.658585	2	-0.0387663	-0.423631	USA	Dinamap Pro 300	GE Healthcare	Dinamap	PRK312	Physiologic Monitoring System
0.352781	-0.440785	-0.29063	-1.1749	-0.372795	-0.0449093	0.0251645	0.658585	2	0.0200634	-0.423631	USA	Dinamap Pro 300	GE Healthcare	Dinamap	PRK312	Physiologic Monitoring System
0.487558	-0.440785	-0.29063	-1.1749	-0.372795	-0.0449093	-0.325682	0.658585	2	-0.0810803	-0.551262	USA	SureSigns VM6	Philips Medical Systems	SureSigns	PRK312	Physiologic Monitoring System
0.352781	-0.440785	-0.29063	-1.1749	-0.372795	-0.0449093	-0.276423	0.658585	2	-0.06026	-0.423631	USA	Dinamap Pro 300	GE Healthcare	Dinamap	PRK312	Physiologic Monitoring System
0.487558	2.26841	-0.29063	-1.1749	-0.372795	-0.0449093	-0.199762	0.658585	2	-0.0482932	-0.556843	China	Mindray Pm-600 Ii	Shenzhen Mindray Bio-Medical Electronics Co Ltd	Mindray	PRK312	Physiologic Monitoring System
0.487558	2.26841	-0.29063	-1.1749	-0.372795	-0.0449093	-0.181246	0.658585	2	0.00954084	-0.556843	China	Mindray Pm-600 Ii	Shenzhen Mindray Bio-Medical Electronics Co Ltd	Mindray	PRK312	Physiologic Monitoring System
0.487558	2.26841	-0.29063	-1.1749	-0.372795	-0.0449093	0.103648	0.658585	2	0.00563389	-0.556843	China	Mindray Pm-600 Ii	Shenzhen Mindray Bio-Medical Electronics Co Ltd	Mindray	PRK312	Physiologic Monitoring System
0.487558	2.26841	-0.29063	-1.1749	-0.372795	-0.0449093	-0.320544	0.658585	2	-0.053809	-0.556843	China	Mindray Pm-600 Ii	Shenzhen Mindray Bio-Medical Electronics Co Ltd	Mindray	PRK312	Physiologic Monitoring System
0.487558	2.26841	-0.29063	-1.1749	-0.372795	-0.0449093	-0.316401	0.658585	2	-0.034946	-0.558704	China	Mindray Pm-600 Ii	Shenzhen Mindray Bio-Medical Electronics Co Ltd	Mindray	PRK312	Physiologic Monitoring System
0.487558	2.26841	-0.29063	-1.1749	-0.372795	-0.0449093	0.117966	0.658585	2	-0.0493808	-0.556843	China	Mindray Pm-600 Ii	Shenzhen Mindray Bio-Medical Electronics Co Ltd	Mindray	PRK312	Physiologic Monitoring System
0.487558	2.26841	-0.29063	-1.1749	-0.372795	-0.0449093	-0.117605	0.658585	2	0.0912242	-0.556843	China	Mindray Pm-600 Ii	Shenzhen Mindray Bio-Medical Electronics Co Ltd	Mindray	PRK312	Physiologic Monitoring System
0.487558	2.26841	-0.29063	-1.1749	-0.372795	-0.0449093	-0.270355	0.658585	2	-0.0434785	-0.556843	China	Mindray Pm-600 Ii	Shenzhen Mindray Bio-Medical Electronics Co Ltd	Mindray	PRK312	Physiologic Monitoring System
0.487558	2.26841	-0.29063	-1.1749	-0.372795	-0.0449093	-0.164388	0.658585	2	-0.0352388	-0.556843	China	Mindray Pm-600 Ii	Shenzhen Mindray Bio-Medical Electronics Co Ltd	Mindray	PRK312	Physiologic Monitoring System
0.487558	2.26841	-0.29063	-1.1749	-0.372795	-0.0449093	-0.289433	0.658585	2	-0.0300458	-0.556843	China	Mindray Pm-600 Ii	Shenzhen Mindray Bio-Medical Electronics Co Ltd	Mindray	PRK312	Physiologic Monitoring System
0.487558	2.26841	-0.29063	-1.1749	-0.372795	-0.0449093	-0.310858	0.658585	2	0.00990219	-0.556843	China	Mindray Pm-600 Ii	Shenzhen Mindray Bio-Medical Electronics Co Ltd	Mindray	PRK312	Physiologic Monitoring System
0.487558	2.26841	-0.29063	-1.1749	-0.372795	-0.0449093	-0.274821	0.658585	2	-0.0428864	-0.556843	China	Mindray Pm-600 Ii	Shenzhen Mindray Bio-Medical Electronics Co Ltd	Mindray	PRK312	Physiologic Monitoring System
0.487558	2.26841	-0.29063	-1.1749	-0.372795	-0.0449093	-0.230819	0.658585	2	-0.0470733	-0.558704	China	Mindray Pm-600 Ii	Shenzhen Mindray Bio-Medical Electronics Co Ltd	Mindray	PRK312	Physiologic Monitoring System
0.487558	2.26841	-0.29063	-1.1749	-0.372795	-0.0449093	-0.328371	0.658585	2	-0.0977494	-0.556843	China	Mindray Pm-600 Ii	Shenzhen Mindray Bio-Medical Electronics Co Ltd	Mindray	PRK312	Physiologic Monitoring System
0.487558	2.26841	-0.29063	-1.1749	-0.372795	-0.0449093	-0.320167	0.658585	2	-0.0567929	-0.558704	China	Mindray Pm-600 Ii	Shenzhen Mindray Bio-Medical Electronics Co Ltd	Mindray	PRK312	Physiologic Monitoring System
0.487558	2.26841	-0.29063	-1.1749	-0.372795	-0.0449093	-0.083372	0.658585	2	-0.0802521	-0.556843	China	Mindray Pm-600 Ii	Shenzhen Mindray Bio-Medical Electronics Co Ltd	Mindray	PRK312	Physiologic Monitoring System
-0.590655	-0.440785	-0.29063	-1.1749	-0.372795	-0.0449093	-0.168117	0.658585	2	-0.00855317	0.532666	USA	Goldway UT4000A	Goldway Inc	Goldway	PRK310	Physiologic Monitoring System
-0.455879	-0.440785	-0.29063	-1.1749	-0.372795	-0.0449093	-0.31874	0.658585	2	-0.0427458	0.39871	USA	Propaq CS 242	Welch Allyn Inc	Propaq	PRK310	Physiologic Monitoring System
-0.590655	-0.440785	-0.29063	-1.1749	-0.372795	-0.0449093	-0.173181	0.658585	2	0.199817	0.617505	China	Goldway G30	Shenzhen Goldway Industrial Inc	Goldway	PRK310	Physiologic Monitoring System
-0.590655	-0.440785	-0.29063	-1.1749	-0.372795	-0.0449093	-0.320563	0.658585	2	-0.0887196	0.617505	China	Goldway G30	Shenzhen Goldway Industrial Inc	Goldway	PRK310	Physiologic Monitoring System
0.757111	-0.440785	-0.29063	-1.1749	-0.372795	-0.0449093	0.34512	0.658585	2	0.205961	-0.743637	USA	Dinamap Pro 300	GE Healthcare	Dinamap	PRK310	Physiologic Monitoring System
-0.590655	-0.440785	-0.29063	-1.1749	-0.372795	-0.0449093	-0.307194	0.658585	2	-0.0955467	0.534527	USA	Propaq CS 242	Welch Allyn Inc	Propaq	PRK310	Physiologic Monitoring System
-0.590655	-0.440785	-0.29063	-1.1749	-0.372795	-0.0449093	-0.325636	0.658585	2	-0.0061051	0.640575	China	Goldway UT4000A	Philips Goldway Shenzhen Industrial Inc	Goldway	PRK310	Physiologic Monitoring System
-0.590655	-0.440785	-0.29063	-1.1749	-0.372795	-0.0449093	-0.327275	0.658585	2	-0.00607406	0.640575	China	Goldway UT4000A	Philips Goldway Shenzhen Industrial Inc	Goldway	PRK310	Physiologic Monitoring System
-0.590655	-0.440785	-0.29063	-1.1749	-0.372795	-0.0449093	-0.330369	0.658585	2	-0.106363	0.584016	Malaysia	Aria	Saadat Sdn Bhd	Aria	PRK310	Physiologic Monitoring System
-0.590655	-0.440785	-0.29063	-1.1749	-0.372795	-0.0449093	-0.300472	0.658585	2	-0.0907115	0.584016	Malaysia	Aria	Saadat Sdn Bhd	Aria	PRK310	Physiologic Monitoring System
-0.590655	-0.440785	-0.29063	-1.1749	-0.372795	-0.0449093	-0.174092	0.658585	2	-0.106363	0.584016	Malaysia	Aria	Saadat Sdn Bhd	Aria	PRK310	Physiologic Monitoring System
-0.590655	-0.440785	-0.29063	-1.1749	-0.372795	-0.0449093	-0.30398	0.658585	2	-0.0918529	0.584016	USA	Propaq CS 242	Welch Allyn Inc	Propaq	PRK310	Physiologic Monitoring System
-0.590655	-0.440785	-0.29063	-1.1749	-0.372795	-0.0449093	-0.327183	0.658585	2	-0.105005	0.584016	USA	Propaq CS 242	Welch Allyn Inc	Propaq	PRK310	Physiologic Monitoring System
-0.590655	-0.440785	-0.29063	-1.1749	-0.372795	-0.0449093	-0.085683	0.658585	2	-0.0838944	0.584016	USA	Propaq CS 242	Welch Allyn Inc	Propaq	PRK310	Physiologic Monitoring System
-0.590655	-0.440785	-0.29063	-1.1749	-0.372795	-0.0449093	-0.32966	0.658585	2	-0.105843	0.584016	USA	Propaq CS 242	Welch Allyn Inc	Propaq	PRK310	Physiologic Monitoring System
-0.590655	-0.440785	-0.29063	-1.1749	-0.372795	-0.0449093	-0.329374	0.658585	2	-0.0964439	0.584016	USA	Propaq CS 242	Welch Allyn Inc	Propaq	PRK310	Physiologic Monitoring System
-0.0515487	-0.440785	-0.29063	-1.1749	-0.372795	-0.0449093	-0.29063	0.658585	2	-0.0302742	0.0273543	USA	Propaq CS 242	Welch Allyn Inc	Propaq	PRK310	Physiologic Monitoring System
1.16144	-0.440785	-0.29063	-1.1749	-0.372795	-0.0449093	0.259225	0.658585	2	0.265318	-1.18383	USA	Propaq CS 242	Welch Allyn Inc	Propaq	PRK310	Physiologic Monitoring System
-0.0515487	-0.440785	-0.29063	-1.1749	-0.372795	-0.0449093	1.02371	0.658585	2	-0.025542	-0.00650682	USA	Propaq CS 242	Welch Allyn Inc	Propaq	PRK310	Physiologic Monitoring System
0.352781	-0.440785	4.72854	-1.1749	-0.372795	-0.0449093	-0.298787	0.658585	2	-0.0488748	-0.314234	USA	Cas 750 E-3nl	Cas Medical Systems Inc	CAS	PRK310	Physiologic Monitoring System
0.757111	-0.440785	-0.29063	-1.1749	-0.372795	-0.0449093	-0.149766	0.658585	2	0.390301	-0.743637	USA	Dinamap Pro 300	GE Healthcare	Dinamap	PRK310	Physiologic Monitoring System
-0.590655	-0.440785	-0.29063	-1.1749	-0.372795	-0.0449093	-0.258468	0.658585	2	-0.00607289	0.536387	USA	Propaq CS 242	Welch Allyn Inc	Propaq	PRK310	Physiologic Monitoring System
-0.590655	-0.440785	-0.29063	-1.1749	-0.372795	-0.0449093	-0.227467	0.658585	2	-0.0605593	0.536387	USA	Propaq CS 242	Welch Allyn Inc	Propaq	PRK310	Physiologic Monitoring System
-0.0515487	-0.440785	-0.29063	-1.1749	-0.372795	-0.0449093	-0.324706	0.658585	2	-0.0846112	-0.00650682	South Korea	Lucon M20	Mediana Co Ltd	Mediana	PRK310	Physiologic Monitoring System
-0.321102	-0.440785	-0.29063	-1.1749	-0.372795	-0.0449093	-0.190048	0.658585	2	-0.0401935	0.364849	USA	Neuvision 500	Newtech Medical Ltd	Neuvision	PRK310	Physiologic Monitoring System
-0.455879	-0.440785	-0.29063	-1.1749	-0.372795	-0.0449093	-0.252263	0.658585	2	-0.0767997	0.416943	USA	Propaq CS 242	Welch Allyn Inc	Propaq	PRK310	Physiologic Monitoring System
-0.455879	-0.440785	-0.29063	-1.1749	-0.372795	-0.0449093	-0.328527	0.658585	2	-0.0771886	0.416943	USA	Propaq CS 242	Welch Allyn Inc	Propaq	PRK310	Physiologic Monitoring System
-0.590655	2.26841	-0.29063	-1.1749	-0.372795	-0.0449093	-0.308326	0.658585	2	-0.0841737	0.584016	USA	Propaq LT	Welch Allyn Inc	Propaq	PRK310	Physiologic Monitoring System
-0.590655	2.26841	-0.29063	-1.1749	-0.372795	-0.0449093	-0.32734	0.658585	2	-0.103939	0.584016	USA	Propaq LT	Welch Allyn Inc	Propaq	PRK310	Physiologic Monitoring System
-0.590655	2.26841	-0.29063	-1.1749	-0.372795	-0.0449093	-0.328693	0.658585	2	-0.0773432	0.655087	USA	Propaq LT	Welch Allyn Inc	Propaq	PRK310	Physiologic Monitoring System
-1.26454	-0.440785	-0.29063	-1.1749	-0.372795	-0.0449093	-0.330369	0.658585	2	-0.106363	1.31333	China	Efficia CM10	Philips Goldway (Shenzhen) Industrial Inc	Efficia	PRK310	Physiologic Monitoring System
-1.26454	-0.440785	-0.29063	-1.1749	-0.372795	-0.0449093	-0.330369	0.658585	2	-0.106363	1.31891	China	Efficia CM10	Philips Goldway (Shenzhen) Industrial Inc	Efficia	PRK310	Physiologic Monitoring System
-1.12976	-0.440785	-0.29063	-1.1749	-0.372795	-0.0449093	-0.330369	0.658585	2	-0.106363	1.18831	Finland	Carescape B650	GE Medical Systems	GE	PRK310	Physiologic Monitoring System
-1.26454	-0.440785	-0.29063	-1.1749	-0.372795	-0.0449093	-0.330369	0.658585	2	-0.106363	1.32859	China	Edan iM20	Edan Instruments Inc	Edan	PRK326	Physiologic Monitoring System
-1.26454	-0.440785	-0.29063	-1.1749	-0.372795	-0.0449093	-0.330369	0.658585	2	-0.106363	1.32859	China	X12	Edan Instruments Inc	Edan	PRK326	Physiologic Monitoring System
-1.26454	-0.440785	-0.29063	-1.1749	-0.372795	-0.0449093	-0.330369	0.658585	2	-0.106363	1.32115	China	X12	Edan Instruments Inc	Edan	PRK326	Physiologic Monitoring System
-0.455879	-0.440785	-0.29063	-1.1749	-0.372795	-0.0449093	0.803159	0.658585	2	-0.0911946	0.394617	USA	Propaq LT	Welch Allyn Protocol Inc	Propaq	PRK326	Physiologic Monitoring System
-0.455879	-0.440785	-0.29063	-1.1749	-0.372795	-0.0449093	-0.107283	0.658585	2	-0.0743821	0.521131	Switzerland	Welch Allyn 1500	Schiller AG	Welch Allyn	PRK326	Physiologic Monitoring System
-0.725432	-0.440785	-0.29063	-1.1749	-0.372795	-0.0449093	-0.307442	0.658585	2	-0.105886	0.786811	China	Mindray iMEC8	Shenzhen Mindray Bio-Medical Electronics Co Ltd	Mindray	PRK326	Physiologic Monitoring System
-0.455879	-0.440785	-0.29063	-1.1749	-0.372795	-0.0449093	0.531514	0.658585	2	-0.101392	0.521131	USA	Propaq CS 242	Welch Allyn Inc	Propaq	PRK326	Physiologic Monitoring System
-0.590655	-0.440785	-0.29063	-1.1749	-0.372795	-0.0449093	-0.329798	0.658585	2	-0.0757677	0.609319	Japan	Nihon Kohden Pvm-2701	Nihon Kohden Corp	Nihon Kohden	PRK326	Physiologic Monitoring System
-0.590655	-0.440785	-0.29063	-1.1749	-0.372795	-0.0449093	0.475635	0.658585	2	-0.0882646	0.53676	China	Mindray iMEC10	Shenzhen Mindray Bio-Medical Electronics Co Ltd	Mindray	PRK326	Physiologic Monitoring System
-0.455879	-0.440785	-0.29063	-1.1749	-0.372795	-0.0449093	0.296561	0.658585	2	-0.0200198	0.521131	USA	Propaq CS 242	Welch Allyn Inc	Propaq	PRK326	Physiologic Monitoring System
-0.590655	-0.440785	-0.29063	-1.1749	-0.372795	-0.0449093	-0.306991	0.658585	2	-0.072809	0.53676	China	Mindray iMEC10	Shenzhen Mindray Bio-Medical Electronics Co Ltd	Mindray	PRK326	Physiologic Monitoring System
-0.455879	-0.440785	-0.29063	-1.1749	-0.372795	-0.0449093	1.58565	0.658585	2	-0.0595092	0.410618	USA	Propaq CS 242	Welch Allyn Inc	Propaq	PRK326	Physiologic Monitoring System
-0.590655	-0.440785	-0.29063	-1.1749	-0.372795	-0.0449093	0.0963558	0.658585	2	-0.0538529	0.530062	South Korea	Lucon M20	Mediana Co Ltd	Mediana	PRK333	Physiologic Monitoring System
-0.590655	-0.440785	-0.29063	-1.1749	-0.372795	-0.0449093	-0.0130553	0.658585	2	0.0114729	0.530062	South Korea	Lucon M20	Mediana Co Ltd	Mediana	PRK333	Physiologic Monitoring System
0.487558	-0.440785	-0.29063	-1.1749	-0.372795	-0.0449093	-0.0736029	0.658585	2	0.200816	-0.554238	USA	Dinamap Pro 300	GE Healthcare	Dinamap	PRK333	Physiologic Monitoring System
1.29622	-0.440785	2.21895	-1.1749	-0.372795	-0.0449093	-0.330369	0.658585	2	-0.106363	-1.24932	Japan	Lifescope Lc	Nihon Kohden Corp	Lifescope	PRK333	Physiologic Monitoring System
0.218005	-0.440785	-0.29063	-1.1749	-0.372795	-0.0449093	0.078291	0.658585	2	0.184129	-0.170231	China	SureSigns VM4	Philips Medical Systems	SureSigns	PRK333	Physiologic Monitoring System
-0.455879	-0.440785	-0.29063	-1.1749	-0.372795	-0.0449093	-0.299902	0.658585	2	-0.00513818	0.403548	China	Mindray iMEC8	Shenzhen Mindray Bio-Medical Electronics Co Ltd	Mindray	PRK333	Physiologic Monitoring System
-0.455879	-0.440785	-0.29063	-1.1749	-0.372795	-0.0449093	-0.326336	0.658585	2	-0.101151	0.403548	China	Mindray iMEC8	Shenzhen Mindray Bio-Medical Electronics Co Ltd	Mindray	PRK333	Physiologic Monitoring System
-0.455879	-0.440785	-0.29063	-1.1749	-0.372795	-0.0449093	-0.220249	0.658585	2	0.0363764	0.40392	China	Mindray Mec-1000	Shenzhen Mindray Bio-Medical Electronics Co Ltd	Mindray	PRK333	Physiologic Monitoring System
0.487558	-0.440785	-0.29063	-1.1749	-0.372795	-0.0449093	-0.0206974	0.658585	2	5.79693	-0.554238	USA	Dinamap Pro 300	GE Healthcare	Dinamap	PRK333	Physiologic Monitoring System
-0.455879	-0.440785	-0.29063	-1.1749	-0.372795	-0.0449093	0.933793	0.658585	2	1.04587	0.40392	China	Mindray Mec-1000	Shenzhen Mindray Bio-Medical Electronics Co Ltd	Mindray	PRK333	Physiologic Monitoring System
-0.455879	-0.440785	-0.29063	-1.1749	-0.372795	-0.0449093	0.41134	0.658585	2	0.187532	0.52448	USA	Propaq CS 242	Welch Allyn Inc	Propaq	PRK333	Physiologic Monitoring System
-0.455879	-0.440785	-0.29063	-1.1749	-0.372795	-0.0449093	1.19491	0.658585	2	0.607961	0.52448	USA	Propaq CS 242	Welch Allyn Inc	Propaq	PRK333	Physiologic Monitoring System
0.622335	-0.440785	-0.29063	-1.1749	-0.372795	-0.0449093	0.0100828	0.658585	2	2.73758	-0.585123	USA	Propaq CS 242	Welch Allyn Protocol Inc	Propaq	PRK333	Physiologic Monitoring System
-0.590655	-0.440785	-0.29063	-1.1749	-0.372795	-0.0449093	-0.00688637	0.658585	2	0.0444211	0.62904	Germany	Vista 120	Drager Medical GmbH	Vista	PRK333	Physiologic Monitoring System
-0.590655	-0.440785	-0.29063	-1.1749	-0.372795	-0.0449093	0.0842297	0.658585	2	0.320754	0.62904	Germany	Vista 120	Drager Medical GmbH	Vista	PRK333	Physiologic Monitoring System
-0.455879	-0.440785	-0.29063	-1.1749	-0.372795	-0.0449093	-0.0919072	0.658585	2	0.0438225	0.523736	South Korea	Lucon M20	Mediana Co Ltd	Mediana	PRK333	Physiologic Monitoring System
-0.455879	-0.440785	-0.29063	-1.1749	-0.372795	-0.0449093	-0.0434212	0.658585	2	0.190805	0.523736	South Korea	Lucon M20	Mediana Co Ltd	Mediana	PRK333	Physiologic Monitoring System
-0.455879	-0.440785	-0.29063	-1.1749	-0.372795	-0.0449093	-0.0211486	0.658585	2	0.0849582	0.523736	South Korea	Lucon M20	Mediana Co Ltd	Mediana	PRK333	Physiologic Monitoring System
-0.590655	-0.440785	-0.29063	-1.1749	-0.372795	-0.0449093	0.506654	0.658585	2	0.267098	0.606714	South Korea	Mediana M20	Mediana Co Ltd	Mediana	PRK333	Physiologic Monitoring System
0.083228	-0.440785	-0.29063	-1.1749	-0.372795	-0.0449093	-0.299147	0.658585	2	2.06868	-0.0597172	USA	Goldway UT4000A	Goldway Inc	Goldway	PRK333	Physiologic Monitoring System
-0.725432	-0.440785	-0.29063	-1.1749	-0.372795	-0.0449093	-0.329908	0.658585	2	-0.103261	0.786811	China	Mindray iMEC8	Shenzhen Mindray Bio-Medical Electronics Co Ltd	Mindray	PRK333	Physiologic Monitoring System
-0.725432	-0.440785	-0.29063	-1.1749	-0.372795	-0.0449093	-0.330369	0.658585	2	-0.106363	0.786811	China	Mindray iMEC8	Shenzhen Mindray Bio-Medical Electronics Co Ltd	Mindray	PRK333	Physiologic Monitoring System
-0.590655	2.26841	-0.29063	-1.1749	-0.372795	-0.0449093	-0.14345	0.658585	2	0.10092	0.60411	USA	Propaq LT	Welch Allyn Inc	Propaq	PRK333	Physiologic Monitoring System
-0.994985	-0.440785	-0.29063	-1.1749	-0.372795	-0.0449093	-0.309726	0.658585	2	-0.0784138	1.04765	China	Mindray Imec 8	Shenzhen Mindray Bio-Medical Electronics Co Ltd	Mindray	PRK333	Physiologic Monitoring System
-0.994985	-0.440785	-0.29063	-1.1749	-0.372795	-0.0449093	-0.323003	0.658585	2	-0.099145	1.05249	Japan	Nihon Kohden SVM-7601	Nihon Kohden Corp	Nihon Kohden	PRK333	Physiologic Monitoring System
-1.26454	-0.440785	-0.29063	-1.1749	-0.372795	-0.0449093	-0.330369	0.658585	2	-0.106363	1.31519	Germany	IntelliVue MX450	Philips Medical Systems	Philips	PRK319	Physiologic Monitoring System
0.487558	-0.440785	-0.29063	-1.1749	-0.372795	-0.0449093	-0.328371	0.658585	2	-0.0670068	-0.429585	USA	Trio	Datascope Corp	Trio	PRK319	Physiologic Monitoring System
0.487558	-0.440785	-0.29063	-1.1749	-0.372795	-0.0449093	-0.321125	0.658585	2	-0.0641061	-0.483539	USA	Dinamap Pro 300	GE Healthcare	Dinamap	PRK319	Physiologic Monitoring System
0.487558	-0.440785	-0.29063	-1.1749	-0.372795	-0.0449093	-0.325627	0.658585	2	-0.0695644	-0.483539	USA	Dinamap Pro 300	GE Healthcare	Dinamap	PRK319	Physiologic Monitoring System
0.487558	-0.440785	-0.29063	-1.1749	-0.372795	-0.0449093	-0.32153	0.658585	2	-0.0247707	-0.483539	USA	Dinamap Pro 300	GE Healthcare	Dinamap	PRK319	Physiologic Monitoring System
-0.455879	-0.440785	-0.29063	-1.1749	-0.372795	-0.0449093	-0.211667	0.658585	2	0.0648671	0.511085	Japan	Nihon Kohden Pvm-2701	Nihon Kohden Corp	Nihon Kohden	PRK319	Physiologic Monitoring System
-0.455879	-0.440785	-0.29063	-1.1749	-0.372795	-0.0449093	-0.0821474	0.658585	2	-0.0974636	0.511085	Japan	Nihon Kohden Pvm-2701	Nihon Kohden Corp	Nihon Kohden	PRK319	Physiologic Monitoring System
-0.455879	-0.440785	-0.29063	-1.1749	-0.372795	-0.0449093	-0.330369	0.658585	2	-0.10424	0.394617	China	SureSigns VM6	Philips Medical Systems	SureSigns	PRK319	Physiologic Monitoring System
-0.455879	-0.440785	-0.29063	-1.1749	-0.372795	-0.0449093	-0.330369	0.658585	2	-0.106363	0.394617	China	SureSigns VM6	Philips Medical Systems	SureSigns	PRK319	Physiologic Monitoring System
-0.590655	-0.440785	-0.29063	-1.1749	-0.372795	-0.0449093	-0.329448	0.658585	2	-0.105861	0.605226	China	Mindray iMEC12	Shenzhen Mindray Bio-Medical Electronics Co Ltd	Mindray	PRK319	Physiologic Monitoring System
-0.0515487	-0.440785	-0.29063	-1.1749	-0.372795	-0.0449093	-0.328067	0.658585	2	-0.0934055	0.0273543	USA	Propaq CS 242	Welch Allyn Inc	Propaq	PRK319	Physiologic Monitoring System
-0.455879	-0.440785	-0.29063	-1.1749	-0.372795	-0.0449093	-0.327524	0.658585	2	-0.0996914	0.511085	China	Anyview A3	Guangdong Biolight Meditech Co Ltd	Biolight	PRK319	Physiologic Monitoring System
-0.455879	-0.440785	-0.29063	-1.1749	-0.372795	-0.0449093	-0.279848	0.658585	2	0.000639958	0.511085	China	Goldway UT4000A	Shenzhen Goldway Industrial Co Ltd	Goldway	PRK319	Physiologic Monitoring System
-0.455879	-0.440785	-0.29063	-1.1749	-0.372795	-0.0449093	-0.329908	0.658585	2	-0.104445	0.511085	China	Anyview A3	Guangdong Biolight Meditech Co Ltd	Biolight	PRK319	Physiologic Monitoring System
-0.455879	-0.440785	-0.29063	-1.1749	-0.372795	-0.0449093	-0.294709	0.658585	2	0.0312531	0.511085	China	Goldway UT4000A	Philips Goldway (Shenzhen) Industrial Inc	Goldway	PRK319	Physiologic Monitoring System
-0.590655	-0.440785	-0.29063	-1.1749	-0.372795	-0.0449093	-0.329448	0.658585	2	-0.105383	0.605226	China	Goldway G30	Shenzhen Goldway Industrial Inc	Goldway	PRK319	Physiologic Monitoring System
-0.725432	-0.440785	-0.29063	-1.1749	-0.372795	-0.0449093	-0.277868	0.658585	2	-0.0867805	0.786811	China	Mindray iMEC8	Shenzhen Mindray Bio-Medical Electronics Co Ltd	Mindray	PRK319	Physiologic Monitoring System
-0.590655	2.26841	-0.29063	-1.1749	-0.372795	-0.0449093	-0.330369	0.658585	2	-0.106363	0.533783	USA	Welch Allyn 1500	Welch Allyn Inc	Welch Allyn	PRK319	Physiologic Monitoring System
0.218005	-0.440785	2.21895	-1.1749	-0.372795	-0.0449093	-0.187121	0.658585	2	0.0126724	-0.20558	USA	Cas 750k-3ms	Cas Medical Systems Inc	CAS	PRK330	Physiologic Monitoring System
0.218005	-0.440785	-0.29063	-1.1749	-0.372795	-0.0449093	-0.190601	0.658585	2	0.0265391	-0.229395	South Korea	Lucon M20	Mediana Co Ltd	Mediana	PRK330	Physiologic Monitoring System
-0.725432	-0.440785	-0.29063	-1.1749	-0.372795	-0.0449093	-0.191338	0.658585	2	0.0223369	0.766717	China	Goldway UT4000A	Shenzhen Goldway Industrial Co Ltd	Goldway	PRK330	Physiologic Monitoring System
-0.725432	-0.440785	-0.29063	-1.1749	-0.372795	-0.0449093	-0.324458	0.658585	2	-0.0617722	0.766717	China	Goldway UT4000A	Shenzhen Goldway Industrial Co Ltd	Goldway	PRK330	Physiologic Monitoring System
-0.590655	-0.440785	-0.29063	-1.1749	-0.372795	-0.0449093	-0.0560537	0.658585	2	-0.0468976	0.534155	China	Mindray iMEC12	Shenzhen Mindray Bio-Medical Electronics Co Ltd	Mindray	PRK330	Physiologic Monitoring System
-0.590655	-0.440785	-0.29063	-1.1749	-0.372795	-0.0449093	-0.12789	0.658585	2	-0.0934342	0.534155	China	Mindray iMEC12	Shenzhen Mindray Bio-Medical Electronics Co Ltd	Mindray	PRK330	Physiologic Monitoring System
-0.590655	-0.440785	-0.29063	-1.1749	-0.372795	-0.0449093	0.00418088	0.658585	2	-0.0610647	0.534155	China	Mindray iMEC12	Shenzhen Mindray Bio-Medical Electronics Co Ltd	Mindray	PRK330	Physiologic Monitoring System
-0.590655	-0.440785	-0.29063	-1.1749	-0.372795	-0.0449093	-0.0953599	0.658585	2	-0.0518277	0.534155	China	Mindray iMEC12	Shenzhen Mindray Bio-Medical Electronics Co Ltd	Mindray	PRK330	Physiologic Monitoring System
-0.455879	-0.440785	-0.29063	-1.1749	-0.372795	-0.0449093	-0.135707	0.658585	2	-0.041523	0.402431	China	Mindray Mec-1000	Shenzhen Mindray Bio-Medical Electronics Co Ltd	Mindray	PRK330	Physiologic Monitoring System
-0.455879	-0.440785	-0.29063	-1.1749	-0.372795	-0.0449093	-0.330369	0.658585	2	-0.106363	0.402431	China	Mindray Mec-1000	Shenzhen Mindray Bio-Medical Electronics Co Ltd	Mindray	PRK330	Physiologic Monitoring System
-0.455879	-0.440785	-0.29063	-1.1749	-0.372795	-0.0449093	-0.324697	0.658585	2	-0.104515	0.416943	USA	Propaq CS 242	Welch Allyn Inc	Propaq	PRK330	Physiologic Monitoring System
-0.455879	-0.440785	-0.29063	-1.1749	-0.372795	-0.0449093	0.563915	0.658585	2	-0.0119529	0.523364	USA	Propaq CS 242	Welch Allyn Inc	Propaq	PRK330	Physiologic Monitoring System
-0.455879	-0.440785	-0.29063	-1.1749	-0.372795	-0.0449093	-0.186283	0.658585	2	-0.0856467	0.523364	USA	Propaq CS 242	Welch Allyn Inc	Propaq	PRK330	Physiologic Monitoring System
0.352781	-0.440785	2.21895	-1.1749	-0.372795	-0.0449093	-0.0584016	0.658585	2	-9.91467e-05	-0.314234	USA	Cas 750 E-3nl	Cas Medical Systems Inc	CAS	PRK330	Physiologic Monitoring System
0.622335	-0.440785	-0.29063	-1.1749	-0.372795	-0.0449093	-0.25287	0.658585	2	-0.0332025	-0.609309	USA	Press-Mate Bp-88 Max	Colin Medical Technology Corp	Press-Mate	PRK330	Physiologic Monitoring System
-0.590655	-0.440785	-0.29063	-1.1749	-0.372795	-0.0449093	-0.238912	0.658585	2	-0.104352	0.60411	China	Goldway G30	Shenzhen Goldway Industrial Inc	Goldway	PRK330	Physiologic Monitoring System
-0.321102	-0.440785	-0.29063	-1.1749	-0.372795	-0.0449093	-0.216087	0.658585	2	-0.0812835	0.261033	Germany	Biocare Im 12e	Phydemed Gmbh	Biocare	PRK330	Physiologic Monitoring System
-0.725432	-0.440785	-0.29063	-1.1749	-0.372795	-0.0449093	-0.328527	0.658585	2	-0.10502	0.782718	Malaysia	Nihon Kohden SVM-7601	Nihon Kohden Sdn Bhd	Nihon Kohden	PRK330	Physiologic Monitoring System
-0.590655	-0.440785	-0.29063	-1.1749	-0.372795	-0.0449093	1.18217	0.658585	2	0.0912874	0.534155	China	Goldway UT4000A	Shenzhen Goldway Industrial Co Ltd	Goldway	PRK330	Physiologic Monitoring System
-0.590655	-0.440785	-0.29063	-1.1749	-0.372795	-0.0449093	0.00754157	0.658585	2	0.219435	0.60411	China	Goldway G30	Shenzhen Goldway Industrial Inc	Goldway	PRK330	Physiologic Monitoring System
-0.725432	-0.440785	-0.29063	-1.1749	-0.372795	-0.0449093	-0.324145	0.658585	2	-0.0721923	0.782718	Malaysia	Nihon Kohden SVM-7601	Nihon Kohden Sdn Bhd	Nihon Kohden	PRK330	Physiologic Monitoring System
-0.590655	-0.440785	-0.29063	-1.1749	-0.372795	-0.0449093	0.342671	0.658585	2	0.196592	0.534155	China	Goldway UT4000A	Shenzhen Goldway Industrial Co Ltd	Goldway	PRK330	Physiologic Monitoring System
0.352781	-0.440785	-0.29063	-1.1749	-0.372795	-0.0449093	0.0523446	0.658585	2	0.637432	-0.421771	USA	Welch Allyn 53n00	Welch Allyn Inc	Welch Allyn	PRK330	Physiologic Monitoring System
-0.725432	-0.440785	-0.29063	-1.1749	-0.372795	-0.0449093	-0.283439	0.658585	2	-0.101759	0.782718	Malaysia	Nihon Kohden SVM-7601	Nihon Kohden Sdn Bhd	Nihon Kohden	PRK330	Physiologic Monitoring System
-0.321102	-0.440785	-0.29063	-1.1749	-0.372795	-0.0449093	-0.19386	0.658585	2	-0.0906166	0.261033	Germany	Biocare Im 12e	Phydemed Gmbh	Biocare	PRK330	Physiologic Monitoring System
-0.590655	-0.440785	-0.29063	-1.1749	-0.372795	-0.0449093	-0.201153	0.658585	2	-0.0527056	0.534155	China	Goldway UT4000A	Shenzhen Goldway Industrial Co Ltd	Goldway	PRK330	Physiologic Monitoring System
-0.725432	-0.440785	-0.29063	-1.1749	-0.372795	-0.0449093	-0.308603	0.658585	2	-0.102814	0.782718	Malaysia	Nihon Kohden SVM-7601	Nihon Kohden Sdn Bhd	Nihon Kohden	PRK330	Physiologic Monitoring System
0.083228	2.26841	-0.29063	-1.1749	-0.372795	-0.0449093	-0.285179	0.658585	2	0.0444843	-0.0883689	China	Biocare Pm-800	Shenzhen Biocare Electronics Co Ltd	Biocare	PRK330	Physiologic Monitoring System
-0.725432	2.26841	-0.29063	-1.1749	-0.372795	-0.0449093	-0.254703	0.658585	2	0.00329359	0.782718	USA	Propaq LT	Welch Allyn Inc	Propaq	PRK330	Physiologic Monitoring System
-0.725432	2.26841	-0.29063	-1.1749	-0.372795	-0.0449093	-0.100792	0.658585	2	-0.0247274	0.782718	USA	Propaq LT	Welch Allyn Inc	Propaq	PRK330	Physiologic Monitoring System
-0.725432	2.26841	-0.29063	-1.1749	-0.372795	-0.0449093	-0.270696	0.658585	2	-0.0178669	0.782718	USA	Propaq LT	Welch Allyn Inc	Propaq	PRK330	Physiologic Monitoring System
-0.725432	2.26841	-0.29063	-1.1749	-0.372795	-0.0449093	-0.296458	0.658585	2	-0.0933182	0.782718	USA	Propaq LT	Welch Allyn Inc	Propaq	PRK330	Physiologic Monitoring System
-1.26454	-0.440785	-0.29063	-1.1749	-0.372795	-0.0449093	-0.330369	0.658585	2	-0.106363	1.30626	Germany	IntelliVue X3	Philips MedizinSysteme GmbH	IntelliVue	PRK330	Physiologic Monitoring System
-1.26454	-0.440785	-0.29063	-1.1749	-0.372795	-0.0449093	-0.330369	0.658585	2	-0.106363	1.3178	Germany	IntelliVue MX430	Philips Medical Systems	IntelliVue	PRK342	Physiologic Monitoring System
-1.26454	-0.440785	-0.29063	-1.1749	-0.372795	-0.0449093	-0.32141	0.658585	2	-0.0977201	1.30552	China	Goldway G30	Philips Goldway (Shenzhen) Industrial Inc	Goldway	PRK342	Physiologic Monitoring System
0.352781	-0.440785	-0.29063	-1.1749	-0.372795	-0.0449093	-0.291237	0.658585	2	0.0472375	-0.41805	China	Dash 2500	GE Medical Systems	Dash	PRK342	Physiologic Monitoring System
-0.455879	-0.440785	-0.29063	-1.1749	-0.372795	-0.0449093	-0.328527	0.658585	2	-0.0883337	0.514434	China	Goldway G40	Goldway Inc	Goldway	PRK342	Physiologic Monitoring System
0.083228	-0.440785	-0.29063	-1.1749	-0.372795	-0.0449093	-0.319394	0.658585	2	-0.0400916	-0.146044	Germany	IntelliVue MP5	Philips MedizinSysteme GmbH	IntelliVue	PRK342	Physiologic Monitoring System
-0.455879	-0.440785	-0.29063	-1.1749	-0.372795	-0.0449093	-0.328067	0.658585	2	-0.0872467	0.514434	China	Goldway G30	Shenzhen Goldway Industrial Inc	Goldway	PRK342	Physiologic Monitoring System
-0.455879	-0.440785	-0.29063	-1.1749	-0.372795	-0.0449093	0.191109	0.658585	2	-0.0817432	0.514434	China	Goldway G40	Goldway Inc	Goldway	PRK342	Physiologic Monitoring System
-0.590655	-0.440785	-0.29063	-1.1749	-0.372795	-0.0449093	1.54383	0.658585	2	-0.0499934	0.604482	China	Goldway UT4000A	Philips Goldway Industrial Co Inc	Goldway	PRK342	Physiologic Monitoring System
-0.590655	-0.440785	-0.29063	-1.1749	-0.372795	-0.0449093	-0.0880677	0.658585	2	0.160564	0.604482	China	Goldway G30	Shenzhen Goldway Industrial Inc	Goldway	PRK342	Physiologic Monitoring System
-0.590655	-0.440785	-0.29063	-1.1749	-0.372795	-0.0449093	-0.330369	0.658585	2	-0.106363	0.607459	South Korea	Mediana M20	Mediana Co Ltd	Mediana	PRK342	Physiologic Monitoring System
-0.590655	-0.440785	-0.29063	-1.1749	-0.372795	-0.0449093	-0.329927	0.658585	2	-0.106363	0.537132	China	Mindray iMEC12	Shenzhen Mindray Bio-Medical Electronics Co Ltd	Mindray	PRK300	Physiologic Monitoring System
-0.994985	-0.440785	-0.29063	-1.1749	-0.372795	-0.0449093	-0.330369	0.658585	2	-0.106363	1.03761	China	BeneView T9	Shenzhen Mindray Bio-Medical Electronics Co Ltd	Beneview	PRK300	Physiologic Monitoring System
-0.994985	-0.440785	-0.29063	-1.1749	-0.372795	-0.0449093	-0.330369	0.658585	2	-0.106363	1.03761	China	BeneView T9	Shenzhen Mindray Bio-Medical Electronics Co Ltd	Beneview	PRK300	Physiologic Monitoring System
-0.994985	-0.440785	-0.29063	-1.1749	-0.372795	-0.0449093	-0.330369	0.658585	2	-0.106363	1.03761	China	BeneView T9	Shenzhen Mindray Bio-Medical Electronics Co Ltd	Beneview	PRK300	Physiologic Monitoring System
-0.994985	-0.440785	-0.29063	-1.1749	-0.372795	-0.0449093	-0.330369	0.658585	2	-0.106363	1.03761	China	BeneView T9	Shenzhen Mindray Bio-Medical Electronics Co Ltd	Beneview	PRK300	Physiologic Monitoring System
-0.994985	-0.440785	-0.29063	-1.1749	-0.372795	-0.0449093	-0.330369	0.658585	2	-0.106363	1.03761	China	BeneView T9	Shenzhen Mindray Bio-Medical Electronics Co Ltd	Beneview	PRK300	Physiologic Monitoring System
-0.994985	-0.440785	-0.29063	-1.1749	-0.372795	-0.0449093	-0.330369	0.658585	2	-0.106363	1.03761	China	BeneView T9	Shenzhen Mindray Bio-Medical Electronics Co Ltd	Beneview	PRK300	Physiologic Monitoring System
-0.994985	-0.440785	-0.29063	-1.1749	-0.372795	-0.0449093	-0.330369	0.658585	2	-0.106363	1.03761	China	BeneView T9	Shenzhen Mindray Bio-Medical Electronics Co Ltd	Beneview	PRK300	Physiologic Monitoring System
-0.994985	-0.440785	-0.29063	-1.1749	-0.372795	-0.0449093	-0.330369	0.658585	2	-0.106363	1.03761	China	Mindray iMEC15	Shenzhen Mindray Bio-Medical Electronics Co Ltd	Mindray	PRK300	Physiologic Monitoring System
-0.590655	-0.440785	-0.29063	-1.1749	-0.372795	-0.0449093	-0.328002	0.658585	2	-0.106363	0.537132	China	Mindray iMEC10	Shenzhen Mindray Bio-Medical Electronics Co Ltd	Mindray	PRK300	Physiologic Monitoring System
-1.12976	-0.440785	-0.29063	-1.1749	-0.372795	-0.0449093	-0.329752	0.658585	2	-0.106363	1.17305	Germany	IntelliVue MX700	Philips Medical Systems	Philips	PRK300	Physiologic Monitoring System
-1.12976	-0.440785	-0.29063	-1.1749	-0.372795	-0.0449093	-0.330369	0.658585	2	-0.106363	1.17305	Germany	IntelliVue MX700	Philips Medical Systems	Philips	PRK300	Physiologic Monitoring System
-1.12976	-0.440785	-0.29063	-1.1749	-0.372795	-0.0449093	-0.330369	0.658585	2	-0.106363	1.17305	Germany	IntelliVue MX700	Philips Medical Systems	Philips	PRK300	Physiologic Monitoring System
-1.12976	-0.440785	-0.29063	-1.1749	-0.372795	-0.0449093	-0.327542	0.658585	2	-0.106363	1.17305	Germany	IntelliVue MX700	Philips Medical Systems	Philips	PRK300	Physiologic Monitoring System
-1.12976	-0.440785	-0.29063	-1.1749	-0.372795	-0.0449093	-0.330369	0.658585	2	-0.106363	1.17305	Germany	IntelliVue MX700	Philips Medical Systems	Philips	PRK300	Physiologic Monitoring System
-1.12976	-0.440785	-0.29063	-1.1749	-0.372795	-0.0449093	-0.330369	0.658585	2	-0.106363	1.17268	Germany	IntelliVue MX700	Philips Medical Systems	Philips	PRK300	Physiologic Monitoring System
-1.12976	-0.440785	-0.29063	-1.1749	-0.372795	-0.0449093	-0.330369	0.658585	2	-0.106363	1.17305	Germany	IntelliVue MX700	Philips Medical Systems	Philips	PRK300	Physiologic Monitoring System
-1.12976	-0.440785	-0.29063	-1.1749	-0.372795	-0.0449093	-0.330369	0.658585	2	-0.106363	1.17305	Germany	IntelliVue MX700	Philips Medical Systems	Philips	PRK300	Physiologic Monitoring System
-1.12976	-0.440785	-0.29063	-1.1749	-0.372795	-0.0449093	-0.330369	0.658585	2	-0.106363	1.17305	Germany	IntelliVue MX700	Philips Medical Systems	Philips	PRK300	Physiologic Monitoring System
-1.12976	-0.440785	-0.29063	-1.1749	-0.372795	-0.0449093	-0.330369	0.658585	2	-0.106363	1.17305	Germany	IntelliVue MX700	Philips Medical Systems	Philips	PRK300	Physiologic Monitoring System
-1.12976	-0.440785	-0.29063	-1.1749	-0.372795	-0.0449093	-0.330369	0.658585	2	-0.106363	1.17305	Germany	IntelliVue MX700	Philips Medical Systems	Philips	PRK300	Physiologic Monitoring System
-1.12976	-0.440785	-0.29063	-1.1749	-0.372795	-0.0449093	-0.330369	0.658585	2	-0.106363	1.17305	Germany	IntelliVue MX700	Philips Medical Systems	Philips	PRK300	Physiologic Monitoring System
-1.12976	-0.440785	-0.29063	-1.1749	-0.372795	-0.0449093	-0.330369	0.658585	2	-0.106363	1.18273	USA	Expression Mr200	Philips Medical Systems	Expression	PRK300	Physiologic Monitoring System
-1.12976	-0.440785	-0.29063	-1.1749	-0.372795	-0.0449093	-0.330369	0.658585	2	-0.106363	1.18347	China	BeneVision N15	Shenzhen Mindray Bio-Medical Electronics Co Ltd	BeneVision	PRK300	Physiologic Monitoring System
-1.12976	-0.440785	-0.29063	-1.1749	-0.372795	-0.0449093	-0.330369	0.658585	2	-0.106363	1.18347	China	BeneVision N15	Shenzhen Mindray Bio-Medical Electronics Co Ltd	BeneVision	PRK300	Physiologic Monitoring System
-1.12976	-0.440785	-0.29063	-1.1749	-0.372795	-0.0449093	-0.330369	0.658585	2	-0.106363	1.19352	China	BeneVision N15	Shenzhen Mindray Bio-Medical Electronics Co Ltd	BeneVision	PRK300	Physiologic Monitoring System
-1.12976	-0.440785	-0.29063	-1.1749	-0.372795	-0.0449093	-0.330369	0.658585	2	-0.106363	1.19352	China	BeneVision N15	Shenzhen Mindray Bio-Medical Electronics Co Ltd	BeneVision	PRK300	Physiologic Monitoring System
-1.12976	-0.440785	-0.29063	-1.1749	-0.372795	-0.0449093	-0.330369	0.658585	2	-0.106363	1.19352	China	BeneVision N15	Shenzhen Mindray Bio-Medical Electronics Co Ltd	BeneVision	PRK300	Physiologic Monitoring System
-1.12976	-0.440785	-0.29063	-1.1749	-0.372795	-0.0449093	-0.330369	0.658585	2	-0.106363	1.19352	China	BeneVision N15	Shenzhen Mindray Bio-Medical Electronics Co Ltd	BeneVision	PRK300	Physiologic Monitoring System
-1.12976	-0.440785	-0.29063	-1.1749	-0.372795	-0.0449093	-0.330369	0.658585	2	-0.106363	1.19352	China	BeneVision N15	Shenzhen Mindray Bio-Medical Electronics Co Ltd	BeneVision	PRK300	Physiologic Monitoring System
-1.12976	-0.440785	-0.29063	-1.1749	-0.372795	-0.0449093	-0.330369	0.658585	2	-0.106363	1.20133	China	Mindray ePM 10	Shenzhen Mindray Bio-Medical Electronics Co Ltd	Mindray	PRK300	Physiologic Monitoring System
-1.12976	-0.440785	-0.29063	-1.1749	-0.372795	-0.0449093	-0.330369	0.658585	2	-0.106363	1.20133	China	Mindray ePM 10	Shenzhen Mindray Bio-Medical Electronics Co Ltd	Mindray	PRK300	Physiologic Monitoring System
-1.12976	-0.440785	-0.29063	-1.1749	-0.372795	-0.0449093	-0.330369	0.658585	2	-0.106363	1.20133	China	Mindray ePM 10	Shenzhen Mindray Bio-Medical Electronics Co Ltd	Mindray	PRK300	Physiologic Monitoring System
-1.12976	-0.440785	-0.29063	-1.1749	-0.372795	-0.0449093	-0.330369	0.658585	2	-0.106363	1.20133	China	Mindray ePM 10	Shenzhen Mindray Bio-Medical Electronics Co Ltd	Mindray	PRK300	Physiologic Monitoring System
-1.12976	-0.440785	-0.29063	-1.1749	-0.372795	-0.0449093	-0.330369	0.658585	2	-0.106363	1.18347	China	Mindray Imec 8	Shenzhen Mindray Bio-Medical Electronics Co Ltd	Mindray	PRK300	Physiologic Monitoring System
-1.12976	-0.440785	-0.29063	-1.1749	-0.372795	-0.0449093	-0.330369	0.658585	2	-0.106363	1.18347	China	Mindray Imec 8	Shenzhen Mindray Bio-Medical Electronics Co Ltd	Mindray	PRK300	Physiologic Monitoring System
-1.12976	-0.440785	-0.29063	-1.1749	-0.372795	-0.0449093	-0.32524	0.658585	2	-0.106363	1.18347	China	Mindray Imec 8	Shenzhen Mindray Bio-Medical Electronics Co Ltd	Mindray	PRK300	Physiologic Monitoring System
-1.12976	-0.440785	-0.29063	-1.1749	-0.372795	-0.0449093	-0.330369	0.658585	2	-0.106363	1.19947	China	Mindray Imec8	Shenzhen Mindray Bio-Medical Electronics Co Ltd	Mindray	PRK300	Physiologic Monitoring System
-1.12976	-0.440785	-0.29063	-1.1749	-0.372795	-0.0449093	-0.330369	0.658585	2	-0.106363	1.19947	China	Mindray Imec8	Shenzhen Mindray Bio-Medical Electronics Co Ltd	Mindray	PRK300	Physiologic Monitoring System
-1.12976	-0.440785	-0.29063	-1.1749	-0.372795	-0.0449093	-0.330369	0.658585	2	-0.106363	1.19947	China	Mindray Imec8	Shenzhen Mindray Bio-Medical Electronics Co Ltd	Mindray	PRK300	Physiologic Monitoring System
-1.12976	-0.440785	-0.29063	-1.1749	-0.372795	-0.0449093	-0.330369	0.658585	2	-0.106363	1.19947	China	Mindray Imec8	Shenzhen Mindray Bio-Medical Electronics Co Ltd	Mindray	PRK300	Physiologic Monitoring System
-1.12976	-0.440785	-0.29063	-1.1749	-0.372795	-0.0449093	-0.330369	0.658585	2	-0.106363	1.19947	China	Mindray Imec8	Shenzhen Mindray Bio-Medical Electronics Co Ltd	Mindray	PRK300	Physiologic Monitoring System
-1.12976	-0.440785	-0.29063	-1.1749	-0.372795	-0.0449093	-0.330369	0.658585	2	-0.106363	1.19947	China	Mindray Imec8	Shenzhen Mindray Bio-Medical Electronics Co Ltd	Mindray	PRK300	Physiologic Monitoring System
-1.12976	-0.440785	-0.29063	-1.1749	-0.372795	-0.0449093	-0.330369	0.658585	2	-0.106363	1.19947	China	Mindray Imec8	Shenzhen Mindray Bio-Medical Electronics Co Ltd	Mindray	PRK300	Physiologic Monitoring System
-1.12976	-0.440785	-0.29063	-1.1749	-0.372795	-0.0449093	-0.330369	0.658585	2	-0.106363	1.19947	China	Mindray Imec8	Shenzhen Mindray Bio-Medical Electronics Co Ltd	Mindray	PRK300	Physiologic Monitoring System
-1.12976	-0.440785	-0.29063	-1.1749	-0.372795	-0.0449093	-0.330369	0.658585	2	-0.106363	1.19947	China	Mindray Imec8	Shenzhen Mindray Bio-Medical Electronics Co Ltd	Mindray	PRK300	Physiologic Monitoring System
-1.12976	-0.440785	-0.29063	-1.1749	-0.372795	-0.0449093	-0.330369	0.658585	2	-0.106363	1.19947	China	Mindray Imec8	Shenzhen Mindray Bio-Medical Electronics Co Ltd	Mindray	PRK300	Physiologic Monitoring System
-1.12976	-0.440785	-0.29063	-1.1749	-0.372795	-0.0449093	-0.330369	0.658585	2	-0.106363	1.19389	USA	GE B105	GE Medical Systems Information Technologies Inc	GE	PRK300	Physiologic Monitoring System
-1.12976	-0.440785	-0.29063	-1.1749	-0.372795	-0.0449093	-0.245827	0.658585	2	-0.106363	1.18273	USA	GE B105	GE Medical Systems Information Technologies Inc	GE	PRK300	Physiologic Monitoring System
-1.12976	-0.440785	-0.29063	-1.1749	-0.372795	-0.0449093	-0.330369	0.658585	2	-0.106363	1.19352	China	BeneVision N15	Shenzhen Mindray Bio-Medical Electronics Co Ltd	BeneVision	PRK300	Physiologic Monitoring System
-1.12976	-0.440785	-0.29063	-1.1749	-0.372795	-0.0449093	-0.330369	0.658585	2	-0.106363	1.2017	China	Beneview T8	Shenzhen Mindray Bio-Medical Electronics Co Ltd	Mindray	PRK300	Physiologic Monitoring System
-1.12976	-0.440785	-0.29063	-1.1749	-0.372795	-0.0449093	-0.330369	0.658585	2	-0.106363	1.2017	China	Beneview T8	Shenzhen Mindray Bio-Medical Electronics Co Ltd	Mindray	PRK300	Physiologic Monitoring System
-1.12976	-0.440785	-0.29063	-1.1749	-0.372795	-0.0449093	-0.330369	0.658585	2	-0.106363	1.2017	China	Beneview T8	Shenzhen Mindray Bio-Medical Electronics Co Ltd	Mindray	PRK300	Physiologic Monitoring System
-1.12976	-0.440785	-0.29063	-1.1749	-0.372795	-0.0449093	-0.330369	0.658585	2	-0.106363	1.2017	China	Beneview T8	Shenzhen Mindray Bio-Medical Electronics Co Ltd	Mindray	PRK300	Physiologic Monitoring System
-1.12976	-0.440785	-0.29063	-1.1749	-0.372795	-0.0449093	-0.330369	0.658585	2	-0.106363	1.2017	China	Beneview T8	Shenzhen Mindray Bio-Medical Electronics Co Ltd	Mindray	PRK300	Physiologic Monitoring System
-1.12976	-0.440785	-0.29063	-1.1749	-0.372795	-0.0449093	-0.330369	0.658585	2	-0.106363	1.2017	China	Beneview T8	Shenzhen Mindray Bio-Medical Electronics Co Ltd	Mindray	PRK300	Physiologic Monitoring System
-1.26454	-0.440785	-0.29063	-1.1749	-0.372795	-0.0449093	-0.330369	0.658585	2	-0.106363	1.24784	Germany	IntelliVue MX700	Philips Medical Systems	Philips	PRK300	Physiologic Monitoring System
-1.26454	-0.440785	-0.29063	-1.1749	-0.372795	-0.0449093	-0.330369	0.658585	2	-0.106363	1.2698	Germany	IntelliVue MX430	Philips MedizinSysteme Boeblingen GmbH	IntelliVue	PRK300	Physiologic Monitoring System
-1.26454	-0.440785	-0.29063	-1.1749	-0.372795	-0.0449093	-0.330369	0.658585	2	-0.106363	1.2698	Germany	IntelliVue MX430	Philips MedizinSysteme Boeblingen GmbH	IntelliVue	PRK300	Physiologic Monitoring System
-1.26454	-0.440785	-0.29063	-1.1749	-0.372795	-0.0449093	-0.330369	0.658585	2	-0.106363	1.2698	Germany	IntelliVue MX430	Philips MedizinSysteme Boeblingen GmbH	IntelliVue	PRK300	Physiologic Monitoring System
-1.26454	-0.440785	-0.29063	-1.1749	-0.372795	-0.0449093	-0.330369	0.658585	2	-0.106363	1.2698	Germany	IntelliVue MX430	Philips MedizinSysteme Boeblingen GmbH	IntelliVue	PRK300	Physiologic Monitoring System
-1.26454	-0.440785	-0.29063	-1.1749	-0.372795	-0.0449093	-0.330369	0.658585	2	-0.106363	1.2698	Germany	IntelliVue MX430	Philips MedizinSysteme Boeblingen GmbH	IntelliVue	PRK300	Physiologic Monitoring System
-0.994985	-0.440785	-0.29063	-1.1749	-0.372795	-0.0449093	-0.330369	0.658585	2	-0.106363	1.06589	China	GE B125	GE Medical Systems Information Technologies Inc	GE	PRK300	Physiologic Monitoring System
-0.994985	-0.440785	-0.29063	-1.1749	-0.372795	-0.0449093	-0.330369	0.658585	2	-0.106363	1.04542	The Netherlands	IntelliVue X2, M3002A	Philips Medical Systems	Philips	PRK300	Physiologic Monitoring System
-0.994985	-0.440785	-0.29063	-1.1749	-0.372795	-0.0449093	-0.330369	0.658585	2	-0.106363	1.04542	The Netherlands	IntelliVue X2, M3002A	Philips Medical Systems	Philips	PRK300	Physiologic Monitoring System
-0.994985	-0.440785	-0.29063	-1.1749	-0.372795	-0.0449093	-0.330369	0.658585	2	-0.106363	1.04542	Germany	IntelliVue X2 M3002A	Philips MedizinSysteme Boeblingen GmbH	IntelliVue	PRK300	Physiologic Monitoring System
-0.994985	-0.440785	-0.29063	-1.1749	-0.372795	-0.0449093	-0.330369	0.658585	2	-0.106363	1.04542	The Netherlands	IntelliVue X2, M3002A	Philips Medical Systems	Philips	PRK300	Physiologic Monitoring System
-0.994985	-0.440785	-0.29063	-1.1749	-0.372795	-0.0449093	-0.330369	0.658585	2	-0.106363	1.04542	The Netherlands	IntelliVue X2, M3002A	Philips Medical Systems	Philips	PRK300	Physiologic Monitoring System
-0.994985	-0.440785	-0.29063	-1.1749	-0.372795	-0.0449093	-0.330369	0.658585	2	-0.106363	1.04542	The Netherlands	IntelliVue X2, M3002A	Philips Medical Systems	Philips	PRK300	Physiologic Monitoring System
-0.994985	-0.440785	-0.29063	-1.1749	-0.372795	-0.0449093	-0.330369	0.658585	2	-0.106363	1.04542	The Netherlands	IntelliVue X2, M3002A	Philips Medical Systems	Philips	PRK300	Physiologic Monitoring System
-0.994985	-0.440785	-0.29063	-1.1749	-0.372795	-0.0449093	-0.330369	0.658585	2	-0.106363	1.05807	China	Mindray Imec8	Shenzhen Mindray Bio-Medical Electronics Co Ltd	Mindray	PRK300	Physiologic Monitoring System
-0.994985	-0.440785	-0.29063	-1.1749	-0.372795	-0.0449093	-0.330369	0.658585	2	-0.106363	1.05807	China	Mindray Imec8	Shenzhen Mindray Bio-Medical Electronics Co Ltd	Mindray	PRK300	Physiologic Monitoring System
-1.12976	-0.440785	-0.29063	-1.1749	-0.372795	-0.0449093	-0.330369	0.658585	2	-0.106363	1.12579	China	Efficia CM120	Philip Medical Systems	Efficia	PRK300	Physiologic Monitoring System
-0.590655	2.26841	-0.29063	-1.1749	-0.372795	-0.0449093	-0.329678	0.658585	2	-0.106363	0.527085	USA	Welch Allyn 1500	Welch Allyn Inc	Welch Allyn	PRK300	Physiologic Monitoring System
0.083228	-0.440785	-0.29063	-1.1749	-0.372795	-0.0449093	-0.329098	0.658585	2	-0.106363	-0.0210187	Switzerland	Argus Vs-100	Schiller AG	Argus	PRK300	Physiologic Monitoring System
0.083228	-0.440785	-0.29063	-1.1749	-0.372795	-0.0449093	-0.330369	0.658585	2	-0.106363	-0.0210187	Switzerland	Argus Vs-100	Schiller AG	Argus	PRK300	Physiologic Monitoring System
-0.590655	-0.440785	-0.29063	-1.1749	-0.372795	-0.0449093	-0.219834	0.658585	2	-0.106363	0.533783	Germany	IntelliVue MX700	Philips Medical Systems	IntelliVue	PRK300	Physiologic Monitoring System
-0.590655	-0.440785	-0.29063	-1.1749	-0.372795	-0.0449093	-0.327874	0.658585	2	-0.106363	0.528573	China	Mindray iMEC12	Shenzhen Mindray Bio-Medical Electronics Co Ltd	Mindray	PRK300	Physiologic Monitoring System
-0.590655	-0.440785	-0.29063	-1.1749	-0.372795	-0.0449093	-0.3285	0.658585	2	-0.106363	0.528573	China	Mindray iMEC12	Shenzhen Mindray Bio-Medical Electronics Co Ltd	Mindray	PRK300	Physiologic Monitoring System
-0.994985	-0.440785	-0.29063	-1.1749	-0.372795	-0.0449093	-0.330369	0.658585	2	-0.106363	1.06403	China	Beneview T8	Shenzhen Mindray Bio-Medical Electronics Co Ltd	Beneview	PRK300	Physiologic Monitoring System
-0.994985	-0.440785	-0.29063	-1.1749	-0.372795	-0.0449093	-0.330369	0.658585	2	-0.106363	1.06403	China	Beneview T8	Shenzhen Mindray Bio-Medical Electronics Co Ltd	Beneview	PRK300	Physiologic Monitoring System
-0.994985	-0.440785	-0.29063	-1.1749	-0.372795	-0.0449093	-0.328868	0.658585	2	-0.106363	1.06403	China	Beneview T8	Shenzhen Mindray Bio-Medical Electronics Co Ltd	Beneview	PRK300	Physiologic Monitoring System
-0.994985	-0.440785	-0.29063	-1.1749	-0.372795	-0.0449093	-0.330369	0.658585	2	-0.106363	1.06403	China	Beneview T8	Shenzhen Mindray Bio-Medical Electronics Co Ltd	Beneview	PRK300	Physiologic Monitoring System
-0.994985	-0.440785	-0.29063	-1.1749	-0.372795	-0.0449093	-0.330369	0.658585	2	-0.106363	1.06403	China	Beneview T8	Shenzhen Mindray Bio-Medical Electronics Co Ltd	Beneview	PRK300	Physiologic Monitoring System
-0.994985	-0.440785	-0.29063	-1.1749	-0.372795	-0.0449093	-0.328942	0.658585	2	-0.106363	1.05658	Finland	Carescape B650	GE Medical Systems	Carescape	PRK300	Physiologic Monitoring System
-0.994985	-0.440785	-0.29063	-1.1749	-0.372795	-0.0449093	-0.19689	0.658585	2	-0.106363	1.05658	Finland	Carescape B650	GE Medical Systems	Carescape	PRK300	Physiologic Monitoring System
-0.994985	-0.440785	-0.29063	-1.1749	-0.372795	-0.0449093	-0.330369	0.658585	2	-0.106363	1.05658	Finland	Carescape B650	GE Medical Systems	Carescape	PRK300	Physiologic Monitoring System
-0.994985	-0.440785	-0.29063	-1.1749	-0.372795	-0.0449093	-0.32966	0.658585	2	-0.106363	1.05658	Finland	Carescape B650	GE Medical Systems	Carescape	PRK300	Physiologic Monitoring System
-0.994985	-0.440785	-0.29063	-1.1749	-0.372795	-0.0449093	-0.174	0.658585	2	-0.106363	1.05658	Finland	Carescape B650	GE Medical Systems	Carescape	PRK300	Physiologic Monitoring System
-0.994985	-0.440785	-0.29063	-1.1749	-0.372795	-0.0449093	-0.284175	0.658585	2	-0.106363	1.05658	Finland	Carescape B650	GE Medical Systems	Carescape	PRK300	Physiologic Monitoring System
-0.994985	-0.440785	-0.29063	-1.1749	-0.372795	-0.0449093	-0.174304	0.658585	2	-0.106363	1.05658	Finland	Carescape B650	GE Medical Systems	Carescape	PRK300	Physiologic Monitoring System
-0.994985	-0.440785	-0.29063	-1.1749	-0.372795	-0.0449093	-0.330369	0.658585	2	-0.106363	1.05658	Finland	Carescape B650	GE Medical Systems	Carescape	PRK300	Physiologic Monitoring System
-0.994985	-0.440785	-0.29063	-1.1749	-0.372795	-0.0449093	-0.196291	0.658585	2	-0.106363	1.05621	Finland	Carescape B850	GE Healthcare Finland Oy	Carescape	PRK300	Physiologic Monitoring System
-0.994985	-0.440785	-0.29063	-1.1749	-0.372795	-0.0449093	-0.327588	0.658585	2	-0.106363	1.05621	Finland	Carescape B850	GE Healthcare Finland Oy	Carescape	PRK300	Physiologic Monitoring System
-0.994985	-0.440785	-0.29063	-1.1749	-0.372795	-0.0449093	-0.197368	0.658585	2	-0.106363	1.05621	Finland	Carescape B850	GE Healthcare Finland Oy	Carescape	PRK300	Physiologic Monitoring System
-0.994985	-0.440785	-0.29063	-1.1749	-0.372795	-0.0449093	-0.329448	0.658585	2	-0.106363	1.05621	Finland	Carescape B850	GE Healthcare Finland Oy	Carescape	PRK300	Physiologic Monitoring System
-0.994985	-0.440785	-0.29063	-1.1749	-0.372795	-0.0449093	-0.330369	0.658585	2	-0.106363	1.05621	Finland	Carescape B850	GE Healthcare Finland Oy	Carescape	PRK300	Physiologic Monitoring System
-0.994985	-0.440785	-0.29063	-1.1749	-0.372795	-0.0449093	-0.0852226	0.658585	2	-0.106363	1.05621	Finland	Carescape B850	GE Healthcare Finland Oy	Carescape	PRK300	Physiologic Monitoring System
-0.994985	-0.440785	-0.29063	-1.1749	-0.372795	-0.0449093	-0.329448	0.658585	2	-0.106363	1.05621	Finland	Carescape B850	GE Healthcare Finland Oy	Carescape	PRK300	Physiologic Monitoring System
-0.994985	-0.440785	-0.29063	-1.1749	-0.372795	-0.0449093	-0.329448	0.658585	2	-0.106363	1.05621	Finland	Carescape B850	GE Healthcare Finland Oy	Carescape	PRK300	Physiologic Monitoring System
-0.994985	-0.440785	-0.29063	-1.1749	-0.372795	-0.0449093	-0.298576	0.658585	2	-0.106363	1.05621	Finland	Carescape B850	GE Healthcare Finland Oy	Carescape	PRK300	Physiologic Monitoring System
-0.994985	-0.440785	-0.29063	-1.1749	-0.372795	-0.0449093	-0.19642	0.658585	2	-0.106363	1.05621	Finland	Carescape B850	GE Healthcare Finland Oy	Carescape	PRK300	Physiologic Monitoring System
-0.725432	-0.440785	-0.29063	-1.1749	-0.372795	-0.0449093	-0.15483	0.658585	2	-0.106363	0.779741	China	Newtech Nt2c	Newtech Industrial Corp	New Tech	PRK300	Physiologic Monitoring System
-0.590655	-0.440785	-0.29063	-1.1749	-0.372795	-0.0449093	-0.330369	0.658585	2	-0.106363	0.53676	China	Biolight M8500	Guangdong Biolight Meditech Co Ltd	Biolight	PRK300	Physiologic Monitoring System
-1.12976	-0.440785	-0.29063	-1.1749	-0.372795	-0.0449093	-0.24497	0.658585	2	-0.106363	1.13659	China	Efficia CM120	Philip Medical Systems	Efficia	PRK300	Physiologic Monitoring System
-0.590655	2.26841	-0.29063	-1.1749	-0.372795	-0.0449093	-0.329678	0.658585	2	-0.106363	0.527085	USA	Welch Allyn 1500	Welch Allyn Inc	Welch Allyn	PRK300	Physiologic Monitoring System
-1.12976	-0.440785	-0.29063	-1.1749	-0.372795	-0.0449093	-0.330369	0.658585	2	-0.106363	1.19426	China	Efficia CM10	Philips Goldway (Shenzhen) Industrial Inc	Efficia	PRK300	Physiologic Monitoring System
-1.12976	-0.440785	-0.29063	-1.1749	-0.372795	-0.0449093	-0.330369	0.658585	2	-0.106363	1.11277	China	Mindray iMEC15	Shenzhen Mindray Bio-Medical Electronics Co Ltd	Mindray	PRK300	Physiologic Monitoring System
-1.12976	-0.440785	-0.29063	-1.1749	-0.372795	-0.0449093	-0.330369	0.658585	2	-0.106363	1.11277	China	Mindray iMEC15	Shenzhen Mindray Bio-Medical Electronics Co Ltd	Mindray	PRK300	Physiologic Monitoring System
-1.12976	-0.440785	-0.29063	-1.1749	-0.372795	-0.0449093	-0.329172	0.658585	2	-0.106363	1.11277	China	Mindray iMEC15	Shenzhen Mindray Bio-Medical Electronics Co Ltd	Mindray	PRK300	Physiologic Monitoring System
-1.12976	-0.440785	-0.29063	-1.1749	-0.372795	-0.0449093	-0.330369	0.658585	2	-0.106363	1.11277	China	Mindray iMEC15	Shenzhen Mindray Bio-Medical Electronics Co Ltd	Mindray	PRK300	Physiologic Monitoring System
-1.12976	-0.440785	-0.29063	-1.1749	-0.372795	-0.0449093	-0.330369	0.658585	2	-0.106363	1.11277	China	Mindray iMEC15	Shenzhen Mindray Bio-Medical Electronics Co Ltd	Mindray	PRK300	Physiologic Monitoring System
-1.12976	-0.440785	-0.29063	-1.1749	-0.372795	-0.0449093	-0.330369	0.658585	2	-0.106363	1.11277	China	Mindray iMEC15	Shenzhen Mindray Bio-Medical Electronics Co Ltd	Mindray	PRK300	Physiologic Monitoring System
-1.12976	-0.440785	-0.29063	-1.1749	-0.372795	-0.0449093	-0.330369	0.658585	2	-0.106363	1.11277	China	Mindray iMEC15	Shenzhen Mindray Bio-Medical Electronics Co Ltd	Mindray	PRK300	Physiologic Monitoring System
-1.12976	-0.440785	-0.29063	-1.1749	-0.372795	-0.0449093	-0.308289	0.658585	2	-0.106363	1.11277	China	Mindray iMEC15	Shenzhen Mindray Bio-Medical Electronics Co Ltd	Mindray	PRK300	Physiologic Monitoring System
-1.12976	-0.440785	-0.29063	-1.1749	-0.372795	-0.0449093	-0.329632	0.658585	2	-0.106363	1.11277	China	Mindray iMEC15	Shenzhen Mindray Bio-Medical Electronics Co Ltd	Mindray	PRK300	Physiologic Monitoring System
-1.12976	-0.440785	-0.29063	-1.1749	-0.372795	-0.0449093	-0.330369	0.658585	2	-0.106363	1.11277	China	Mindray iMEC15	Shenzhen Mindray Bio-Medical Electronics Co Ltd	Mindray	PRK300	Physiologic Monitoring System
-1.12976	-0.440785	-0.29063	-1.1749	-0.372795	-0.0449093	-0.131793	0.658585	2	-0.106363	1.11277	China	Mindray iMEC15	Shenzhen Mindray Bio-Medical Electronics Co Ltd	Mindray	PRK300	Physiologic Monitoring System
-1.12976	-0.440785	-0.29063	-1.1749	-0.372795	-0.0449093	-0.330369	0.658585	2	-0.106363	1.11277	China	Mindray iMEC15	Shenzhen Mindray Bio-Medical Electronics Co Ltd	Mindray	PRK300	Physiologic Monitoring System
-1.12976	-0.440785	-0.29063	-1.1749	-0.372795	-0.0449093	-0.330369	0.658585	2	-0.106363	1.11277	China	Mindray iMEC15	Shenzhen Mindray Bio-Medical Electronics Co Ltd	Mindray	PRK300	Physiologic Monitoring System
-1.12976	-0.440785	-0.29063	-1.1749	-0.372795	-0.0449093	-0.330369	0.658585	2	-0.106363	1.11277	China	Mindray iMEC15	Shenzhen Mindray Bio-Medical Electronics Co Ltd	Mindray	PRK300	Physiologic Monitoring System
-1.12976	-0.440785	-0.29063	-1.1749	-0.372795	-0.0449093	-0.330369	0.658585	2	-0.106363	1.11277	China	Mindray iMEC15	Shenzhen Mindray Bio-Medical Electronics Co Ltd	Mindray	PRK300	Physiologic Monitoring System
-1.12976	-0.440785	-0.29063	-1.1749	-0.372795	-0.0449093	-0.329291	0.658585	2	-0.106363	1.11277	China	Mindray iMEC15	Shenzhen Mindray Bio-Medical Electronics Co Ltd	Mindray	PRK300	Physiologic Monitoring System
-1.12976	-0.440785	-0.29063	-1.1749	-0.372795	-0.0449093	-0.329605	0.658585	2	-0.106363	1.11277	China	Mindray iMEC15	Shenzhen Mindray Bio-Medical Electronics Co Ltd	Mindray	PRK300	Physiologic Monitoring System
-1.12976	-0.440785	-0.29063	-1.1749	-0.372795	-0.0449093	-0.086392	0.658585	2	-0.106363	1.11277	China	Mindray iMEC15	Shenzhen Mindray Bio-Medical Electronics Co Ltd	Mindray	PRK300	Physiologic Monitoring System
-1.12976	-0.440785	-0.29063	-1.1749	-0.372795	-0.0449093	-0.330369	0.658585	2	-0.106363	1.11277	China	Mindray iMEC15	Shenzhen Mindray Bio-Medical Electronics Co Ltd	Mindray	PRK300	Physiologic Monitoring System
-1.12976	-0.440785	-0.29063	-1.1749	-0.372795	-0.0449093	-0.330369	0.658585	2	-0.106363	1.11277	China	Mindray iMEC15	Shenzhen Mindray Bio-Medical Electronics Co Ltd	Mindray	PRK300	Physiologic Monitoring System
-1.12976	-0.440785	-0.29063	-1.1749	-0.372795	-0.0449093	-0.330369	0.658585	2	-0.106363	1.11277	China	Mindray iMEC15	Shenzhen Mindray Bio-Medical Electronics Co Ltd	Mindray	PRK300	Physiologic Monitoring System
-1.12976	-0.440785	-0.29063	-1.1749	-0.372795	-0.0449093	-0.330369	0.658585	2	-0.106363	1.11277	China	Mindray iMEC15	Shenzhen Mindray Bio-Medical Electronics Co Ltd	Mindray	PRK300	Physiologic Monitoring System
-1.12976	-0.440785	-0.29063	-1.1749	-0.372795	-0.0449093	-0.330046	0.658585	2	-0.106363	1.11277	China	Mindray iMEC15	Shenzhen Mindray Bio-Medical Electronics Co Ltd	Mindray	PRK300	Physiologic Monitoring System
-1.12976	-0.440785	-0.29063	-1.1749	-0.372795	-0.0449093	-0.328988	0.658585	2	-0.106363	1.11277	China	Mindray iMEC15	Shenzhen Mindray Bio-Medical Electronics Co Ltd	Mindray	PRK300	Physiologic Monitoring System
-1.12976	-0.440785	-0.29063	-1.1749	-0.372795	-0.0449093	-0.330369	0.658585	2	-0.106363	1.11277	China	Mindray iMEC15	Shenzhen Mindray Bio-Medical Electronics Co Ltd	Mindray	PRK300	Physiologic Monitoring System
-1.12976	-0.440785	-0.29063	-1.1749	-0.372795	-0.0449093	-0.329743	0.658585	2	-0.106363	1.11277	China	Mindray iMEC15	Shenzhen Mindray Bio-Medical Electronics Co Ltd	Mindray	PRK300	Physiologic Monitoring System
-1.12976	-0.440785	-0.29063	-1.1749	-0.372795	-0.0449093	-0.330369	0.658585	2	-0.106363	1.11277	China	Mindray iMEC15	Shenzhen Mindray Bio-Medical Electronics Co Ltd	Mindray	PRK300	Physiologic Monitoring System
-1.12976	-0.440785	-0.29063	-1.1749	-0.372795	-0.0449093	-0.330028	0.658585	2	-0.106363	1.11277	China	Mindray iMEC15	Shenzhen Mindray Bio-Medical Electronics Co Ltd	Mindray	PRK300	Physiologic Monitoring System
-1.12976	-0.440785	-0.29063	-1.1749	-0.372795	-0.0449093	-0.269416	0.658585	2	-0.106363	1.11277	China	Mindray iMEC15	Shenzhen Mindray Bio-Medical Electronics Co Ltd	Mindray	PRK300	Physiologic Monitoring System
-1.12976	-0.440785	-0.29063	-1.1749	-0.372795	-0.0449093	-0.330369	0.658585	2	-0.106363	1.13659	Germany	IntelliVue MX500	Philips Medical Systems	IntelliVue	PRK300	Physiologic Monitoring System
-1.12976	-0.440785	-0.29063	-1.1749	-0.372795	-0.0449093	-0.330369	0.658585	2	-0.106363	1.13659	Germany	IntelliVue MX500	Philips Medical Systems	IntelliVue	PRK300	Physiologic Monitoring System
-1.12976	-0.440785	-0.29063	-1.1749	-0.372795	-0.0449093	-0.330369	0.658585	2	-0.106363	1.13659	Germany	IntelliVue MX500	Philips Medical Systems	IntelliVue	PRK300	Physiologic Monitoring System
-1.12976	-0.440785	-0.29063	-1.1749	-0.372795	-0.0449093	-0.330369	0.658585	2	-0.106363	1.13659	Germany	IntelliVue MX500	Philips Medical Systems	IntelliVue	PRK300	Physiologic Monitoring System
-1.12976	-0.440785	-0.29063	-1.1749	-0.372795	-0.0449093	-0.330369	0.658585	2	-0.106363	1.13659	Germany	IntelliVue MX500	Philips Medical Systems	IntelliVue	PRK300	Physiologic Monitoring System
-1.12976	-0.440785	-0.29063	-1.1749	-0.372795	-0.0449093	-0.32931	0.658585	2	-0.106363	1.13659	Germany	IntelliVue MX400	Philips Medical Systems	IntelliVue	PRK300	Physiologic Monitoring System
-1.12976	-0.440785	-0.29063	-1.1749	-0.372795	-0.0449093	-0.329356	0.658585	2	-0.106363	1.13659	Germany	IntelliVue MX500	Philips Medical Systems	IntelliVue	PRK300	Physiologic Monitoring System
-1.12976	-0.440785	-0.29063	-1.1749	-0.372795	-0.0449093	-0.329651	0.658585	2	-0.106363	1.13659	China	Efficia CM120	Philip Medical Systems	Efficia	PRK300	Physiologic Monitoring System
-1.12976	-0.440785	-0.29063	-1.1749	-0.372795	-0.0449093	-0.330369	0.658585	2	-0.106363	1.13659	Germany	IntelliVue MX500	Philips Medical Systems	IntelliVue	PRK300	Physiologic Monitoring System
-1.12976	-0.440785	-0.29063	-1.1749	-0.372795	-0.0449093	-0.330369	0.658585	2	-0.106363	1.13659	Germany	IntelliVue MX500	Philips Medical Systems	IntelliVue	PRK300	Physiologic Monitoring System
-1.12976	-0.440785	-0.29063	-1.1749	-0.372795	-0.0449093	-0.173871	0.658585	2	-0.106363	1.13659	China	Efficia CM120	Philip Medical Systems	Efficia	PRK300	Physiologic Monitoring System
-1.12976	-0.440785	-0.29063	-1.1749	-0.372795	-0.0449093	-0.330369	0.658585	2	-0.106363	1.13659	China	Efficia CM120	Philip Medical Systems	Efficia	PRK300	Physiologic Monitoring System
-1.12976	-0.440785	-0.29063	-1.1749	-0.372795	-0.0449093	-0.174783	0.658585	2	-0.106363	1.13659	China	Efficia CM120	Philip Medical Systems	Efficia	PRK300	Physiologic Monitoring System
-1.12976	-0.440785	-0.29063	-1.1749	-0.372795	-0.0449093	-0.330369	0.658585	2	-0.106363	1.13659	Germany	IntelliVue MX500	Philips Medical Systems	IntelliVue	PRK300	Physiologic Monitoring System
-1.12976	-0.440785	-0.29063	-1.1749	-0.372795	-0.0449093	-0.330369	0.658585	2	-0.106363	1.13659	Germany	IntelliVue MX500	Philips Medical Systems	IntelliVue	PRK300	Physiologic Monitoring System
-1.12976	-0.440785	-0.29063	-1.1749	-0.372795	-0.0449093	-0.330369	0.658585	2	-0.106363	1.13659	Germany	IntelliVue MX500	Philips Medical Systems	IntelliVue	PRK300	Physiologic Monitoring System
-0.455879	-0.440785	-0.29063	-1.1749	-0.372795	-0.0449093	-0.329291	0.658585	2	-0.106363	0.517038	The Netherlands	Goldway G30	Philips Medical Systems	Goldway	PRK300	Physiologic Monitoring System
0.218005	-0.440785	-0.29063	-1.1749	-0.372795	-0.0449093	-0.322082	0.658585	2	0.00142123	-0.205208	China	Newtech Nt2c	Newtech Industrial Corp	Newtech	PRK300	Physiologic Monitoring System
2.64398	-0.440785	-0.29063	-1.1749	-0.372795	-0.0449093	-0.329356	0.658585	2	-0.0969927	-2.72284	The Netherlands	Hp 78354c	Philips Medical Systems	HP	PRK300	Physiologic Monitoring System
0.218005	-0.440785	-0.29063	-1.1749	-0.372795	-0.0449093	-0.324614	0.658585	2	-0.018763	-0.161301	China	Biocare Bm 9000	Shenzhen Biocare Electronics Co Ltd	Biocare	PRK300	Physiologic Monitoring System
0.083228	-0.440785	4.72854	-1.1749	-0.372795	-0.0449093	1.33244	0.658585	2	-0.106363	-0.0902294	China	Newtech Nt2c	Newtech Industrial Corp	Newtech	PRK300	Physiologic Monitoring System
0.352781	-0.440785	-0.29063	-1.1749	-0.372795	-0.0449093	-0.273357	0.658585	2	0.609489	-0.296001	USA	Datex-Ohmeda S/5	GE Datex-Ohmeda	Datex-Ohmeda	PRK300	Physiologic Monitoring System
1.29622	-0.440785	-0.29063	-1.1749	-0.372795	-0.0449093	0.682985	0.658585	2	1.49538	-1.29062	USA	Datex-Ohmeda As/5	Datex-Ohmeda Inc	Datex-Ohmeda	PRK300	Physiologic Monitoring System
1.29622	-0.440785	2.21895	-1.1749	-0.372795	-0.0449093	0.387732	0.658585	2	3.88407	-1.29062	USA	Datex-Ohmeda Cs/5	Datex-Ohmeda Inc	Datex-Ohmeda	PRK300	Physiologic Monitoring System
0.757111	-0.440785	-0.29063	-1.1749	-0.372795	-0.0449093	-0.292876	0.658585	2	0.454978	-0.718335	USA	Spectrum	Datascope Corp	Spectrum	PRK300	Physiologic Monitoring System
0.083228	-0.440785	-0.29063	-1.1749	-0.372795	-0.0449093	1.3107	0.658585	2	1.15303	-0.14344	USA	Datex-Ohmeda S/5	Datex-Ohmeda Inc	Datex-Ohmeda	PRK300	Physiologic Monitoring System
2.10488	-0.440785	-0.29063	-1.1749	-0.372795	-0.0449093	-0.122282	0.658585	2	1.16221	-2.17846	The Netherlands	Viridia M1166a	Philips Medical Systems	Viridia	PRK300	Physiologic Monitoring System
2.23965	-0.440785	-0.29063	-1.1749	-0.372795	-0.0449093	0.519057	0.658585	2	0.216834	-2.31055	USA	Datex-Ohmeda As/3	Datex-Ohmeda Inc	Datex-Ohmeda	PRK300	Physiologic Monitoring System
0.487558	-0.440785	-0.29063	-1.1749	-0.372795	-0.0449093	-0.0945221	0.658585	2	0.0831046	-0.532657	USA	Datex-Ohmeda S5 Am	Datex-Ohmeda Inc	Datex-Ohmeda	PRK300	Physiologic Monitoring System
0.487558	-0.440785	-0.29063	-1.1749	-0.372795	-0.0449093	-0.22964	0.658585	2	0.116173	-0.532657	USA	Datex-Ohmeda S5 Am	Datex-Ohmeda Inc	Datex-Ohmeda	PRK300	Physiologic Monitoring System
0.487558	-0.440785	-0.29063	-1.1749	-0.372795	-0.0449093	-0.204044	0.658585	2	0.105503	-0.532657	USA	Datex-Ohmeda S5 Am	Datex-Ohmeda Inc	Datex-Ohmeda	PRK300	Physiologic Monitoring System
2.23965	-0.440785	-0.29063	-1.1749	-0.372795	-0.0449093	0.898584	0.658585	2	0.631574	-2.31055	USA	Datex-Ohmeda As/3	Datex-Ohmeda Inc	Datex-Ohmeda	PRK300	Physiologic Monitoring System
0.218005	-0.440785	-0.29063	-1.1749	-0.372795	-0.0449093	-0.298355	0.658585	2	0.152915	-0.289303	China	SureSigns VM8	Philips Medical Systems	SureSigns	PRK300	Physiologic Monitoring System
0.218005	-0.440785	-0.29063	-1.1749	-0.372795	-0.0449093	-0.025697	0.658585	2	0.322546	-0.289303	China	SureSigns VM8	Philips Medical Systems	SureSigns	PRK300	Physiologic Monitoring System
1.70055	-0.440785	2.21895	-1.1749	-0.372795	-0.0449093	-0.266884	0.658585	2	0.250144	-1.7524	USA	Passport 5l	Datascope Corp	Passport	PRK300	Physiologic Monitoring System
1.70055	-0.440785	-0.29063	-1.1749	-0.372795	-0.0449093	0.35035	0.658585	2	0.285854	-1.7524	USA	Passport 5l	Datascope Corp	Passport	PRK300	Physiologic Monitoring System
0.352781	-0.440785	-0.29063	-1.1749	-0.372795	-0.0449093	3.76185	0.658585	2	0.643224	-0.296001	USA	Datex-Ohmeda S/5	GE Datex-Ohmeda	Datex-Ohmeda	PRK300	Physiologic Monitoring System
0.757111	-0.440785	-0.29063	-1.1749	-0.372795	-0.0449093	3.55222	0.658585	2	0.205853	-0.756661	China	Biocare Bm 9000	Shenzhen Biocare Electronics Co Ltd	Biocare	PRK300	Physiologic Monitoring System
0.487558	-0.440785	-0.29063	-1.1749	-0.372795	-0.0449093	3.61958	0.658585	2	1.49863	-0.551634	UK	Datex-Ohmeda S/5	Datex-Ohmeda Inc	Datex-Ohmeda	PRK300	Physiologic Monitoring System
0.218005	-0.440785	-0.29063	-1.1749	-0.372795	-0.0449093	0.212498	0.658585	2	0.392126	-0.289303	China	SureSigns VM8	Philips Medical Systems	SureSigns	PRK300	Physiologic Monitoring System
0.757111	-0.440785	-0.29063	-1.1749	-0.372795	-0.0449093	0.804715	0.658585	2	0.755371	-0.754428	Germany	IntelliVue MP40 M8003A	Philips MedizinSysteme GmbH	IntelliVue	PRK300	Physiologic Monitoring System
0.757111	-0.440785	-0.29063	-1.1749	-0.372795	-0.0449093	0.796861	0.658585	2	0.78403	-0.754428	Germany	IntelliVue MP40 M8003A	Philips MedizinSysteme GmbH	IntelliVue	PRK300	Physiologic Monitoring System
0.757111	-0.440785	-0.29063	-1.1749	-0.372795	-0.0449093	-0.258082	0.658585	2	1.90414	-0.754428	Germany	IntelliVue MP40 M8003A	Philips MedizinSysteme GmbH	IntelliVue	PRK300	Physiologic Monitoring System
1.02666	-0.440785	2.21895	-1.1749	-0.372795	-0.0449093	-0.300629	0.658585	2	0.112528	-1.00187	USA	Trio	Datascope Corp	Trio	PRK300	Physiologic Monitoring System
0.083228	-0.440785	-0.29063	-1.1749	-0.372795	-0.0449093	1.98167	0.658585	2	-0.106363	-0.0902294	China	Newtech Nt2c	Newtech Industrial Corp	Newtech	PRK300	Physiologic Monitoring System
-0.0515487	-0.440785	-0.29063	-1.1749	-0.372795	-0.0449093	-0.1517	0.658585	2	-0.106363	-0.0143209	The Netherlands	SureSigns VM6	Philips Medical Systems	SureSigns	PRK300	Physiologic Monitoring System
-0.590655	-0.440785	-0.29063	-1.1749	-0.372795	-0.0449093	-0.243497	0.658585	2	-0.106363	0.533783	Germany	IntelliVue MX700	Philips Medical Systems	IntelliVue	PRK300	Physiologic Monitoring System
-0.455879	-0.440785	-0.29063	-1.1749	-0.372795	-0.0449093	0.624527	0.658585	2	-0.106363	0.520759	Germany	IntelliVue X2, M3002A	Philips Medical Systems	IntelliVue	PRK300	Physiologic Monitoring System
0.757111	-0.440785	-0.29063	-1.1749	-0.372795	-0.0449093	3.64641	0.658585	2	0.654237	-0.703078	Germany	IntelliVue MP20 M8001A	Philips MedizinSysteme GmbH	IntelliVue	PRK300	Physiologic Monitoring System
0.757111	-0.440785	-0.29063	-1.1749	-0.372795	-0.0449093	0.739361	0.658585	2	0.83591	-0.703078	Germany	IntelliVue MP40 M8003A	Philips MedizinSysteme GmbH	IntelliVue	PRK300	Physiologic Monitoring System
0.083228	-0.440785	-0.29063	-1.1749	-0.372795	-0.0449093	0.695387	0.658585	2	-0.106363	-0.0303212	Germany	IntelliVue MP40 M8003A	Philips MedizinSysteme GmbH	IntelliVue	PRK300	Physiologic Monitoring System
0.083228	-0.440785	-0.29063	-1.1749	-0.372795	-0.0449093	1.40577	0.658585	2	-0.106363	-0.0303212	Germany	IntelliVue MP40 M8003A	Philips MedizinSysteme GmbH	IntelliVue	PRK300	Physiologic Monitoring System
0.083228	-0.440785	-0.29063	-1.1749	-0.372795	-0.0449093	0.733156	0.658585	2	0.332004	-0.100648	Germany	IntelliVue MP40 M8003A	Philips MedizinSysteme GmbH	IntelliVue	PRK300	Physiologic Monitoring System
0.622335	-0.440785	-0.29063	-1.1749	-0.372795	-0.0449093	-0.173613	0.658585	2	0.0487637	-0.694892	USA	Vital Signs Monitor 300	Welch Allyn Protocol Inc	Vital Signs	PRK300	Physiologic Monitoring System
1.43099	-0.440785	-0.29063	-1.1749	-0.372795	-0.0449093	1.18593	0.658585	2	0.0814143	-1.43798	USA	Passport Xg	Datascope Corp	Passport	PRK300	Physiologic Monitoring System
-0.321102	-0.440785	-0.29063	-1.1749	-0.372795	-0.0449093	-0.310113	0.658585	2	-0.106363	0.352942	China	SureSigns VM6	Philips Medical Systems	SureSigns	PRK300	Physiologic Monitoring System
-0.455879	-0.440785	-0.29063	-1.1749	-0.372795	-0.0449093	-0.32768	0.658585	2	-0.106363	0.39164	Germany	IntelliVue X2, M3002A	Philips Medical Systems	IntelliVue	PRK300	Physiologic Monitoring System
-0.455879	-0.440785	-0.29063	-1.1749	-0.372795	-0.0449093	-0.320323	0.658585	2	-0.106363	0.39164	Germany	IntelliVue X2, M3002A	Philips Medical Systems	IntelliVue	PRK300	Physiologic Monitoring System
-0.0515487	-0.440785	-0.29063	-1.1749	-0.372795	-0.0449093	0.733358	0.658585	2	-0.106363	-0.00985572	Germany	IntelliVue MP40 M8003A	Philips MedizinSysteme GmbH	IntelliVue	PRK300	Physiologic Monitoring System
-0.0515487	-0.440785	-0.29063	-1.1749	-0.372795	-0.0449093	1.08516	0.658585	2	-0.106363	-0.00985572	Germany	IntelliVue MP40 M8003A	Philips MedizinSysteme GmbH	IntelliVue	PRK300	Physiologic Monitoring System
-0.0515487	-0.440785	-0.29063	-1.1749	-0.372795	-0.0449093	-0.251149	0.658585	2	-0.106363	-0.00985572	Germany	IntelliVue MP40 M8003A	Philips MedizinSysteme GmbH	IntelliVue	PRK300	Physiologic Monitoring System
-0.0515487	-0.440785	-0.29063	-1.1749	-0.372795	-0.0449093	6.40417	0.658585	2	-0.106363	-0.00985572	Germany	IntelliVue MP40 M8003A	Philips MedizinSysteme GmbH	IntelliVue	PRK300	Physiologic Monitoring System
1.02666	-0.440785	-0.29063	-1.1749	-0.372795	-0.0449093	0.744361	0.658585	2	0.482384	-1.00187	USA	Trio	Datascope Corp	Trio	PRK300	Physiologic Monitoring System
1.29622	-0.440785	-0.29063	-1.1749	-0.372795	-0.0449093	0.920157	0.658585	2	0.635596	-1.24672	USA	Escort Prism 20401	Medical Data Electronic Inc	Escort	PRK300	Physiologic Monitoring System
1.29622	-0.440785	-0.29063	-1.1749	-0.372795	-0.0449093	1.31292	0.658585	2	0.741712	-1.24672	USA	Escort Prism 20401	Medical Data Electronic Inc	Escort	PRK300	Physiologic Monitoring System
-0.321102	-0.440785	-0.29063	-1.1749	-0.372795	-0.0449093	-0.277951	0.658585	2	-0.106363	0.256568	Germany	IntelliVue MX700	Philips Medical Systems	IntelliVue	PRK300	Physiologic Monitoring System
-0.321102	-0.440785	-0.29063	-1.1749	-0.372795	-0.0449093	-0.287739	0.658585	2	-0.106363	0.256568	Germany	IntelliVue MX700	Philips Medical Systems	IntelliVue	PRK300	Physiologic Monitoring System
0.218005	-0.440785	-0.29063	-1.1749	-0.372795	-0.0449093	-0.207036	0.658585	2	0.165453	-0.272931	Germany	IntelliVue MP60 M8005A	Philips MedizinSysteme GmbH	IntelliVue	PRK300	Physiologic Monitoring System
0.218005	-0.440785	-0.29063	-1.1749	-0.372795	-0.0449093	0.205205	0.658585	2	1.33092	-0.272931	Germany	IntelliVue MP60 M8005A	Philips MedizinSysteme GmbH	IntelliVue	PRK300	Physiologic Monitoring System
0.218005	-0.440785	-0.29063	-1.1749	-0.372795	-0.0449093	-0.00877388	0.658585	2	0.379183	-0.272931	Germany	IntelliVue MP60 M8005A	Philips MedizinSysteme GmbH	IntelliVue	PRK300	Physiologic Monitoring System
0.218005	-0.440785	-0.29063	-1.1749	-0.372795	-0.0449093	0.867859	0.658585	2	0.470898	-0.272931	Germany	IntelliVue MP60 M8005A	Philips MedizinSysteme GmbH	IntelliVue	PRK300	Physiologic Monitoring System
0.218005	-0.440785	-0.29063	-1.1749	-0.372795	-0.0449093	-0.00858052	0.658585	2	0.474202	-0.272931	Germany	IntelliVue MP60 M8005A	Philips MedizinSysteme GmbH	IntelliVue	PRK300	Physiologic Monitoring System
0.218005	-0.440785	-0.29063	-1.1749	-0.372795	-0.0449093	-0.100378	0.658585	2	0.392862	-0.272931	Germany	IntelliVue MP60 M8005A	Philips MedizinSysteme GmbH	IntelliVue	PRK300	Physiologic Monitoring System
1.43099	-0.440785	-0.29063	-1.1749	-0.372795	-0.0449093	0.53609	0.658585	2	0.224108	-1.39556	USA	Vital Guard 405	Barnant Co	Barnant	PRK300	Physiologic Monitoring System
0.083228	-0.440785	-0.29063	-1.1749	-0.372795	-0.0449093	-0.194468	0.658585	2	-0.106363	-0.142696	USA	Ge Transport Pro	GE Healthcare	GE	PRK300	Physiologic Monitoring System
0.083228	-0.440785	-0.29063	-1.1749	-0.372795	-0.0449093	1.3625	0.658585	2	1.23784	-0.142696	USA	Ge Transport Pro	GE Medical Systems	GE	PRK300	Physiologic Monitoring System
0.352781	-0.440785	-0.29063	-1.1749	-0.372795	-0.0449093	0.0359095	0.658585	2	0.696658	-0.40577	USA	M-Care 300	Spacelabs Healthcare Inc	M-Care	PRK300	Physiologic Monitoring System
0.218005	-0.440785	-0.29063	-1.1749	-0.372795	-0.0449093	-0.0973211	0.658585	2	-0.0616258	-0.197394	China	Biocare Bm 9000s	Shenzhen Biocare Electronics Co Ltd	Biocare	PRK300	Physiologic Monitoring System
0.218005	-0.440785	-0.29063	-1.1749	-0.372795	-0.0449093	1.51638	0.658585	2	-0.0487424	-0.197394	China	Biocare Bm 9000s	Shenzhen Biocare Electronics Co Ltd	Biocare	PRK300	Physiologic Monitoring System
1.02666	-0.440785	-0.29063	-1.1749	-0.372795	-0.0449093	-0.329678	0.658585	2	-0.101643	-1.1042	Japan	Nihon Kohden Bsm-2301k	Nihon Kohden Corp	Nihon Kohden	PRK300	Physiologic Monitoring System
0.487558	-0.440785	-0.29063	-1.1749	-0.372795	-0.0449093	-0.0668079	0.658585	2	0.040575	-0.51554	South Korea	Bionet Bm3 Plus	Bionet Co Ltd	Bionet	PRK300	Physiologic Monitoring System
0.487558	-0.440785	-0.29063	-1.1749	-0.372795	-0.0449093	-0.00683112	0.658585	2	0.0508428	-0.51554	South Korea	Bionet Bm3 Plus	Bionet Co Ltd	Bionet	PRK300	Physiologic Monitoring System
0.487558	-0.440785	-0.29063	-1.1749	-0.372795	-0.0449093	-0.318629	0.658585	2	-0.0448688	-0.51554	South Korea	Bionet Bm3 Plus	Bionet Co Ltd	Bionet	PRK300	Physiologic Monitoring System
-0.455879	-0.440785	-0.29063	-1.1749	-0.372795	-0.0449093	-0.326428	0.658585	2	-0.106363	0.523364	China	Blt M8500	Guangdong Biolight Meditech Co Ltd	BLT	PRK300	Physiologic Monitoring System
-0.725432	-0.440785	-0.29063	-1.1749	-0.372795	-0.0449093	-0.315029	0.658585	2	-0.106363	0.786811	China	Mindray iMEC8	Shenzhen Mindray Bio-Medical Electronics Co Ltd	Mindray	PRK300	Physiologic Monitoring System
-0.321102	-0.440785	-0.29063	-1.1749	-0.372795	-0.0449093	2.55483	0.658585	2	-0.106363	0.266987	USA	SureSigns VS3	Philips Medical Systems	SureSigns	PRK300	Physiologic Monitoring System
0.083228	-0.440785	-0.29063	-1.1749	-0.372795	-0.0449093	0.218381	0.658585	2	-0.106363	-0.0902294	China	Newtech Nt2c	Newtech Industrial Corp	Newtech	PRK300	Physiologic Monitoring System
0.083228	-0.440785	2.21895	-1.1749	-0.372795	-0.0449093	-0.311033	0.658585	2	-0.106363	-0.0902294	UK	Newtech Nt2c	Newtech Industrial Corp	Newtech	PRK300	Physiologic Monitoring System
-0.590655	-0.440785	-0.29063	-1.1749	-0.372795	-0.0449093	-0.310904	0.658585	2	-0.106363	0.528573	China	Mindray iMEC12	Shenzhen Mindray Bio-Medical Electronics Co Ltd	Mindray	PRK300	Physiologic Monitoring System
0.083228	-0.440785	-0.29063	-1.1749	-0.372795	-0.0449093	-0.206594	0.658585	2	-0.106363	-0.0902294	China	Newtech Nt2c	Newtech Industrial Corp	Newtech	PRK300	Physiologic Monitoring System
1.29622	-0.440785	-0.29063	-1.1749	-0.372795	-0.0449093	-0.215967	0.658585	2	0.460311	-1.24672	USA	Escort Prism 20401	Medical Data Electronic Inc	Escort	PRK300	Physiologic Monitoring System
-0.590655	-0.440785	-0.29063	-1.1749	-0.372795	-0.0449093	-0.0991534	0.658585	2	-0.106363	0.531178	Germany	IntelliVue MX700	Philips Medical Systems	IntelliVue	PRK300	Physiologic Monitoring System
-0.590655	-0.440785	-0.29063	-1.1749	-0.372795	-0.0449093	-0.326069	0.658585	2	-0.106363	0.531178	Germany	IntelliVue MX700	Philips Medical Systems	IntelliVue	PRK300	Physiologic Monitoring System
-0.590655	-0.440785	-0.29063	-1.1749	-0.372795	-0.0449093	-0.186835	0.658585	2	-0.106363	0.531178	Germany	IntelliVue MX700	Philips Medical Systems	IntelliVue	PRK300	Physiologic Monitoring System
-0.590655	-0.440785	-0.29063	-1.1749	-0.372795	-0.0449093	-0.326686	0.658585	2	-0.106363	0.531178	Germany	IntelliVue MX700	Philips Medical Systems	IntelliVue	PRK300	Physiologic Monitoring System
-0.590655	-0.440785	-0.29063	-1.1749	-0.372795	-0.0449093	-0.00156451	0.658585	2	-0.106363	0.531178	Germany	IntelliVue MX700	Philips Medical Systems	IntelliVue	PRK300	Physiologic Monitoring System
-0.590655	-0.440785	-0.29063	-1.1749	-0.372795	-0.0449093	-0.17888	0.658585	2	-0.106363	0.531178	Germany	IntelliVue MX700	Philips Medical Systems	IntelliVue	PRK300	Physiologic Monitoring System
0.083228	-0.440785	-0.29063	-1.1749	-0.372795	-0.0449093	-0.321539	0.658585	2	-0.106363	-0.0902294	China	Newtech Nt2c	Newtech Industrial Corp	Newtech	PRK300	Physiologic Monitoring System
-0.186325	-0.440785	-0.29063	-1.1749	-0.372795	-0.0449093	-0.163771	0.658585	2	-0.106363	0.242428	Germany	IntelliVue MX700	Philips Medical Systems	IntelliVue	PRK300	Physiologic Monitoring System
-0.186325	-0.440785	-0.29063	-1.1749	-0.372795	-0.0449093	-0.168476	0.658585	2	-0.106363	0.242428	Germany	IntelliVue MX700	Philips Medical Systems	IntelliVue	PRK300	Physiologic Monitoring System
-0.186325	-0.440785	-0.29063	-1.1749	-0.372795	-0.0449093	-0.00570783	0.658585	2	-0.106363	0.242428	Germany	IntelliVue MX700	Philips Medical Systems	IntelliVue	PRK300	Physiologic Monitoring System
-0.186325	-0.440785	-0.29063	-1.1749	-0.372795	-0.0449093	0.0320792	0.658585	2	-0.106363	0.242428	Germany	IntelliVue MX700	Philips Medical Systems	IntelliVue	PRK300	Physiologic Monitoring System
-0.186325	-0.440785	-0.29063	-1.1749	-0.372795	-0.0449093	-0.160125	0.658585	2	-0.106363	0.242428	Germany	IntelliVue MX700	Philips Medical Systems	IntelliVue	PRK300	Physiologic Monitoring System
-0.186325	-0.440785	-0.29063	-1.1749	-0.372795	-0.0449093	-0.218177	0.658585	2	-0.106363	0.242428	Germany	IntelliVue MX700	Philips Medical Systems	IntelliVue	PRK300	Physiologic Monitoring System
0.083228	-0.440785	-0.29063	-1.1749	-0.372795	-0.0449093	0.263055	0.658585	2	0.0986398	-0.111439	South Korea	Charmcare Prizm 5	Charmcare Co Ltd	Charmcare	PRK300	Physiologic Monitoring System
0.083228	-0.440785	-0.29063	-1.1749	-0.372795	-0.0449093	1.98678	0.658585	2	-0.0201135	-0.111439	South Korea	Charmcare Prizm 5	Charmcare Co Ltd	Charmcare	PRK300	Physiologic Monitoring System
0.083228	-0.440785	-0.29063	-1.1749	-0.372795	-0.0449093	-0.304818	0.658585	2	0.167726	-0.111439	South Korea	Charmcare Prizm 5	Charmcare Co Ltd	Charmcare	PRK300	Physiologic Monitoring System
0.083228	-0.440785	-0.29063	-1.1749	-0.372795	-0.0449093	-0.318141	0.658585	2	-0.00929227	-0.111439	South Korea	Charmcare Prizm 5	Charmcare Co Ltd	Charmcare	PRK300	Physiologic Monitoring System
0.757111	-0.440785	-0.29063	-1.1749	-0.372795	-0.0449093	-0.309422	0.658585	2	0.0722634	-0.7228	The Netherlands	Viridia M1205a	Philips Medical Systems	Viridia	PRK300	Physiologic Monitoring System
0.891888	-0.440785	-0.29063	-1.1749	-0.372795	-0.0449093	2.60571	0.658585	2	0.789232	-0.84857	Germany	IntelliVue MP60 M8005A	Philips MedizinSysteme GmbH	IntelliVue	PRK300	Physiologic Monitoring System
0.891888	-0.440785	-0.29063	-1.1749	-0.372795	-0.0449093	0.951913	0.658585	2	3.46781	-0.84857	Germany	IntelliVue MP60 M8005A	Philips MedizinSysteme GmbH	IntelliVue	PRK300	Physiologic Monitoring System
0.891888	-0.440785	-0.29063	-1.1749	-0.372795	-0.0449093	0.1847	0.658585	2	1.58063	-0.84857	Germany	IntelliVue MP60 M8005A	Philips MedizinSysteme GmbH	IntelliVue	PRK300	Physiologic Monitoring System
0.891888	-0.440785	-0.29063	-1.1749	-0.372795	-0.0449093	-0.0238095	0.658585	2	0.525668	-0.84857	Germany	IntelliVue MP60 M8005A	Philips MedizinSysteme GmbH	IntelliVue	PRK300	Physiologic Monitoring System
0.757111	-0.440785	-0.29063	-1.1749	-0.372795	-0.0449093	1.52771	0.658585	2	2.43557	-0.770429	Germany	IntelliVue MP60 M8005A	Philips MedizinSysteme GmbH	IntelliVue	PRK300	Physiologic Monitoring System
0.757111	-0.440785	-0.29063	-1.1749	-0.372795	-0.0449093	-0.0720101	0.658585	2	0.814065	-0.770429	Germany	IntelliVue MP60 M8005A	Philips MedizinSysteme GmbH	IntelliVue	PRK300	Physiologic Monitoring System
0.757111	-0.440785	-0.29063	-1.1749	-0.372795	-0.0449093	-0.233434	0.658585	2	1.12125	-0.770429	Germany	IntelliVue MP60 M8005A	Philips MedizinSysteme GmbH	IntelliVue	PRK300	Physiologic Monitoring System
0.757111	-0.440785	-0.29063	-1.1749	-0.372795	-0.0449093	2.61495	0.658585	2	1.59712	-0.770429	Germany	IntelliVue MP60 M8005A	Philips MedizinSysteme GmbH	IntelliVue	PRK300	Physiologic Monitoring System
0.757111	-0.440785	-0.29063	-1.1749	-0.372795	-0.0449093	0.0991733	0.658585	2	1.0768	-0.770429	Germany	IntelliVue MP60 M8005A	Philips MedizinSysteme GmbH	IntelliVue	PRK300	Physiologic Monitoring System
0.757111	-0.440785	-0.29063	-1.1749	-0.372795	-0.0449093	0.300704	0.658585	2	2.20882	-0.770429	Germany	IntelliVue MP60 M8005A	Philips MedizinSysteme GmbH	IntelliVue	PRK300	Physiologic Monitoring System
0.757111	-0.440785	-0.29063	-1.1749	-0.372795	-0.0449093	-0.224834	0.658585	2	1.04307	-0.770429	Germany	IntelliVue MP60 M8005A	Philips MedizinSysteme GmbH	IntelliVue	PRK300	Physiologic Monitoring System
0.757111	-0.440785	-0.29063	-1.1749	-0.372795	-0.0449093	-0.146129	0.658585	2	1.33961	-0.770429	Germany	IntelliVue MP60 M8005A	Philips MedizinSysteme GmbH	IntelliVue	PRK300	Physiologic Monitoring System
0.757111	-0.440785	-0.29063	-1.1749	-0.372795	-0.0449093	0.106042	0.658585	2	1.61097	-0.770429	Germany	IntelliVue MP60 M8005A	Philips MedizinSysteme GmbH	IntelliVue	PRK300	Physiologic Monitoring System
0.757111	-0.440785	-0.29063	-1.1749	-0.372795	-0.0449093	-0.257585	0.658585	2	1.35231	-0.770429	Germany	IntelliVue MP60 M8005A	Philips MedizinSysteme GmbH	IntelliVue	PRK300	Physiologic Monitoring System
0.757111	-0.440785	-0.29063	-1.1749	-0.372795	-0.0449093	-0.13694	0.658585	2	1.53811	-0.770429	Germany	IntelliVue MP60 M8005A	Philips MedizinSysteme GmbH	IntelliVue	PRK300	Physiologic Monitoring System
1.43099	-0.440785	-0.29063	-1.1749	-0.372795	-0.0449093	0.807339	0.658585	2	1.1456	-1.499	Germany	Siemens Sc 6002 Xl	Siemens Medical Systems	Siemens	PRK300	Physiologic Monitoring System
0.757111	-0.440785	-0.29063	-1.1749	-0.372795	-0.0449093	-0.0129724	0.658585	2	0.657096	-0.751824	Germany	IntelliVue MP70 M8007A	Philips MedizinSysteme GmbH	IntelliVue	PRK300	Physiologic Monitoring System
1.83532	-0.440785	-0.29063	-1.1749	-0.372795	-0.0449093	-0.297314	0.658585	2	0.495276	-1.79036	The Netherlands	Viridia M3 M3046a	Philips Medical Systems	Viridia	PRK300	Physiologic Monitoring System
-0.186325	-0.440785	-0.29063	-1.1749	-0.372795	-0.0449093	-0.220893	0.658585	2	-0.106363	0.242428	Germany	IntelliVue X2, M3002A	Philips MedizinSysteme GmbH	IntelliVue	PRK300	Physiologic Monitoring System
0.352781	-0.440785	-0.29063	-1.1749	-0.372795	-0.0449093	-0.299754	0.658585	2	0.160113	-0.32949	China	Biocare Bm 9000s	Shenzhen Biocare Electronics Co Ltd	Biocare	PRK300	Physiologic Monitoring System
0.352781	-0.440785	-0.29063	-1.1749	-0.372795	-0.0449093	-0.27344	0.658585	2	0.287787	-0.32949	China	Biocare Bm 9000s	Shenzhen Biocare Electronics Co Ltd	Biocare	PRK300	Physiologic Monitoring System
0.757111	-0.440785	-0.29063	-1.1749	-0.372795	-0.0449093	0.369087	0.658585	2	0.525345	-0.823267	Malaysia	Lifetrack Iv	Life Track Sdn Bhd	Lifetrack	PRK300	Physiologic Monitoring System
0.757111	-0.440785	-0.29063	-1.1749	-0.372795	-0.0449093	-0.305509	0.658585	2	0.108867	-0.823267	Malaysia	Lifetrack Iv	Life Track Sdn Bhd	Lifetrack	PRK300	Physiologic Monitoring System
1.29622	-0.440785	-0.29063	-1.1749	-0.372795	-0.0449093	0.152189	0.658585	2	0.440908	-1.36728	Germany	Siemens Sc 7000	Siemens Medical Systems	Siemens	PRK300	Physiologic Monitoring System
0.622335	-0.440785	4.72854	-1.1749	-0.372795	-0.0449093	0.0650876	0.658585	2	0.0765094	-0.697125	China	Mindray Mec-1000	Shenzhen Mindray Bio-Medical Electronics Co Ltd	Mindray	PRK300	Physiologic Monitoring System
0.352781	-0.440785	-0.29063	-1.1749	-0.372795	-0.0449093	-0.300445	0.658585	2	0.522417	-0.40391	USA	Trax 100	Dre Inc	Trax	PRK300	Physiologic Monitoring System
0.352781	-0.440785	-0.29063	-1.1749	-0.372795	-0.0449093	0.236271	0.658585	2	0.202445	-0.40391	USA	Trax 100	Dre Inc	Trax	PRK300	Physiologic Monitoring System
1.16144	-0.440785	-0.29063	-1.1749	-0.372795	-0.0449093	-0.0750485	0.658585	2	1.31366	-1.1083	Germany	Agilent A3 M3928a	Agilent Technologies Inc	Agilent	PRK300	Physiologic Monitoring System
-0.455879	-0.440785	-0.29063	-1.1749	-0.372795	-0.0449093	-0.301918	0.658585	2	-0.106363	0.399082	China	Procare B40	GE Medical Systems	Procare	PRK300	Physiologic Monitoring System
-0.455879	-0.440785	-0.29063	-1.1749	-0.372795	-0.0449093	-0.205811	0.658585	2	-0.106363	0.399082	USA	Procare B20	GE Medical Systems IT Inc	Procare	PRK300	Physiologic Monitoring System
-0.455879	-0.440785	-0.29063	-1.1749	-0.372795	-0.0449093	-0.250449	0.658585	2	-0.106363	0.399082	USA	Procare B20	GE Medical Systems IT Inc	Procare	PRK300	Physiologic Monitoring System
-0.455879	-0.440785	-0.29063	-1.1749	-0.372795	-0.0449093	-0.0111402	0.658585	2	-0.106363	0.399082	USA	Procare B20	GE Medical Systems IT Inc	Procare	PRK300	Physiologic Monitoring System
1.43099	-0.440785	-0.29063	-1.1749	-0.372795	-0.0449093	0.983679	0.658585	2	0.523582	-1.37993	Germany	Philips A3	Philips MedizinSysteme GmbH	Philips	PRK300	Physiologic Monitoring System
-0.455879	-0.440785	-0.29063	-1.1749	-0.372795	-0.0449093	0.846609	0.658585	2	-0.106363	0.523364	China	Blt M8500	Guangdong Biolight Meditech Co Ltd	BLT	PRK300	Physiologic Monitoring System
-0.725432	-0.440785	-0.29063	-1.1749	-0.372795	-0.0449093	-0.0161306	0.658585	2	-0.106363	0.786811	China	Mindray iMEC8	Shenzhen Mindray Bio-Medical Electronics Co Ltd	Mindray	PRK300	Physiologic Monitoring System
1.02666	-0.440785	4.72854	-1.1749	-0.372795	-0.0449093	-0.30712	0.658585	2	0.0795549	-0.976572	Malaysia	Lifetrack Iv	Life Track Sdn Bhd	Lifetrack	PRK300	Physiologic Monitoring System
-0.590655	-0.440785	-0.29063	-1.1749	-0.372795	-0.0449093	-0.328141	0.658585	2	-0.106363	0.53676	China	Blt M8500	Guangdong Biolight Meditech Co Ltd	BLT	PRK300	Physiologic Monitoring System
-0.725432	-0.440785	-0.29063	-1.1749	-0.372795	-0.0449093	-0.328785	0.658585	2	-0.106363	0.786811	China	Mindray iMEC8	Shenzhen Mindray Bio-Medical Electronics Co Ltd	Mindray	PRK300	Physiologic Monitoring System
-0.725432	-0.440785	-0.29063	-1.1749	-0.372795	-0.0449093	1.135	0.658585	2	-0.106363	0.786811	China	Mindray iMEC8	Shenzhen Mindray Bio-Medical Electronics Co Ltd	Mindray	PRK300	Physiologic Monitoring System
-0.725432	-0.440785	-0.29063	-1.1749	-0.372795	-0.0449093	-0.113692	0.658585	2	-0.106363	0.786811	China	Mindray iMEC8	Shenzhen Mindray Bio-Medical Electronics Co Ltd	Mindray	PRK300	Physiologic Monitoring System
-0.725432	-0.440785	-0.29063	-1.1749	-0.372795	-0.0449093	-0.191715	0.658585	2	-0.106363	0.786811	China	Mindray iMEC8	Shenzhen Mindray Bio-Medical Electronics Co Ltd	Mindray	PRK300	Physiologic Monitoring System
-0.321102	-0.440785	-0.29063	-1.1749	-0.372795	-0.0449093	-0.322745	0.658585	2	-0.106363	0.261033	Germany	IntelliVue MX700	Philips Medical Systems	IntelliVue	PRK300	Physiologic Monitoring System
-0.321102	-0.440785	-0.29063	-1.1749	-0.372795	-0.0449093	-0.201226	0.658585	2	-0.106363	0.261033	Germany	IntelliVue MX700	Philips Medical Systems	IntelliVue	PRK300	Physiologic Monitoring System
-0.321102	-0.440785	-0.29063	-1.1749	-0.372795	-0.0449093	-0.108453	0.658585	2	-0.106363	0.261033	Germany	IntelliVue MX700	Philips Medical Systems	IntelliVue	PRK300	Physiologic Monitoring System
-0.321102	-0.440785	-0.29063	-1.1749	-0.372795	-0.0449093	-0.328343	0.658585	2	-0.106363	0.261033	Germany	IntelliVue MX700	Philips Medical Systems	IntelliVue	PRK300	Physiologic Monitoring System
-0.725432	-0.440785	-0.29063	-1.1749	-0.372795	-0.0449093	-0.280575	0.658585	2	-0.106363	0.786439	China	Newtech Nt2c	Newtech Industrial Corp	Newtech	PRK300	Physiologic Monitoring System
-0.725432	-0.440785	-0.29063	-1.1749	-0.372795	-0.0449093	-0.32791	0.658585	2	-0.106363	0.786811	China	Mindray iMEC8	Shenzhen Mindray Bio-Medical Electronics Co Ltd	Mindray	PRK300	Physiologic Monitoring System
-0.455879	-0.440785	-0.29063	-1.1749	-0.372795	-0.0449093	1.29092	0.658585	2	-0.106363	0.394245	USA	Advanced Pm-2000xl	Advanced Instrumentations Inc	Advanced	PRK300	Physiologic Monitoring System
-0.455879	-0.440785	-0.29063	-1.1749	-0.372795	-0.0449093	0.041084	0.658585	2	-0.106363	0.394245	USA	Advanced Pm-2000xl	Advanced Instrumentations Inc	Advanced	PRK300	Physiologic Monitoring System
0.487558	-0.440785	-0.29063	-1.1749	-0.372795	-0.0449093	-0.0330445	0.658585	2	0.0244588	-0.556843	China	Biocare Bm 9000	Shenzhen Biocare Electronics Co Ltd	Biocare	PRK300	Physiologic Monitoring System
0.487558	-0.440785	-0.29063	-1.1749	-0.372795	-0.0449093	-0.175298	0.658585	2	0.102498	-0.556843	China	Biocare Bm 9000	Shenzhen Biocare Electronics Co Ltd	Biocare	PRK300	Physiologic Monitoring System
0.487558	-0.440785	-0.29063	-1.1749	-0.372795	-0.0449093	-0.253745	0.658585	2	0.0150882	-0.556843	China	Biocare Bm 9000s	Shenzhen Biocare Electronics Co Ltd	Biocare	PRK300	Physiologic Monitoring System
0.487558	-0.440785	-0.29063	-1.1749	-0.372795	-0.0449093	-0.280529	0.658585	2	0.104855	-0.552006	China	Biocare Bm 9000s	Shenzhen Biocare Electronics Co Ltd	Biocare	PRK300	Physiologic Monitoring System
1.43099	-0.440785	-0.29063	-1.1749	-0.372795	-0.0449093	2.25232	0.658585	2	0.567647	-1.41342	Germany	Siemens Sc 7000	Siemens Medical Systems	Siemens	PRK300	Physiologic Monitoring System
0.218005	-0.440785	-0.29063	-1.1749	-0.372795	-0.0449093	1.43873	0.658585	2	1.05063	-0.281117	USA	Ultraview Sl2700	Spacelabs Healthcare Inc	Ultraview	PRK300	Physiologic Monitoring System
0.352781	-0.440785	-0.29063	-1.1749	-0.372795	-0.0449093	-0.143266	0.658585	2	0.426249	-0.40577	USA	Ultraview Sl2700	Spacelabs Healthcare Inc	Ultraview	PRK300	Physiologic Monitoring System
0.352781	-0.440785	-0.29063	-1.1749	-0.372795	-0.0449093	1.57851	0.658585	2	0.769712	-0.40577	USA	Ultraview Sl2700	Spacelabs Healthcare Inc	Ultraview	PRK300	Physiologic Monitoring System
0.352781	-0.440785	-0.29063	-1.1749	-0.372795	-0.0449093	-0.143864	0.658585	2	1.40683	-0.40577	USA	Ultraview Sl2700	Spacelabs Healthcare Inc	Ultraview	PRK300	Physiologic Monitoring System
0.218005	-0.440785	-0.29063	-1.1749	-0.372795	-0.0449093	2.27265	0.658585	2	0.850775	-0.281117	USA	Ultraview Sl2700	Spacelabs Healthcare Inc	Ultraview	PRK300	Physiologic Monitoring System
-0.725432	-0.440785	-0.29063	-1.1749	-0.372795	-0.0449093	-0.2387	0.658585	2	-0.106363	0.786439	China	Newtech Nt2c	Newtech Industrial Corp	Newtech	PRK300	Physiologic Monitoring System
0.218005	-0.440785	-0.29063	-1.1749	-0.372795	-0.0449093	-0.216041	0.658585	2	0.0803016	-0.202976	China	Biocare Bm 9000	Shenzhen Biocare Electronics Co Ltd	Biocare	PRK300	Physiologic Monitoring System
0.757111	-0.440785	-0.29063	-1.1749	-0.372795	-0.0449093	0.718019	0.658585	2	0.231226	-0.703078	China	Mindray Pm-6000	Shenzhen Mindray Bio-Medical Electronics Co Ltd	Mindray	PRK300	Physiologic Monitoring System
0.083228	-0.440785	-0.29063	-1.1749	-0.372795	-0.0449093	-0.110414	0.658585	2	-0.106363	-0.0277165	South Korea	Lucon M20	Mediana Co Ltd	Mediana	PRK300	Physiologic Monitoring System
-0.455879	-0.440785	-0.29063	-1.1749	-0.372795	-0.0449093	-0.329144	0.658585	2	-0.106363	0.417315	USA	Propaq CS 242	Welch Allyn Inc	Propaq	PRK300	Physiologic Monitoring System
1.16144	-0.440785	-0.29063	-1.1749	-0.372795	-0.0449093	1.97481	0.658585	2	1.76064	-1.1589	USA	Propaq CS 242	Welch Allyn Protocol Inc	Propaq	PRK300	Physiologic Monitoring System
1.16144	-0.440785	-0.29063	-1.1749	-0.372795	-0.0449093	1.11696	0.658585	2	1.47387	-1.1589	USA	Propaq CS 242	Welch Allyn Protocol Inc	Propaq	PRK300	Physiologic Monitoring System
1.16144	-0.440785	-0.29063	-1.1749	-0.372795	-0.0449093	0.695967	0.658585	2	0.81881	-1.1589	USA	Propaq CS 242	Welch Allyn Protocol Inc	Propaq	PRK300	Physiologic Monitoring System
0.352781	-0.440785	-0.29063	-1.1749	-0.372795	-0.0449093	1.32464	0.658585	2	0.537439	-0.314234	USA	Cas 750 E-3nl	Cas Medical Systems Inc	CAS	PRK300	Physiologic Monitoring System
0.352781	-0.440785	-0.29063	-1.1749	-0.372795	-0.0449093	-0.0584937	0.658585	2	0.395958	-0.314606	USA	Cas 750 E-3nl	Cas Medical Systems Inc	CAS	PRK300	Physiologic Monitoring System
0.218005	-0.440785	-0.29063	-1.1749	-0.372795	-0.0449093	0.103013	0.658585	2	0.761496	-0.275535	USA	Cas 750k-3ms	Cas Medical Systems Inc	CAS	PRK300	Physiologic Monitoring System
0.218005	-0.440785	-0.29063	-1.1749	-0.372795	-0.0449093	0.0861356	0.658585	2	0.398306	-0.275535	USA	Cas 750k-3ms	Cas Medical Systems Inc	CAS	PRK300	Physiologic Monitoring System
0.218005	-0.440785	-0.29063	-1.1749	-0.372795	-0.0449093	-0.237034	0.658585	2	0.44794	-0.275535	USA	Cas 750k-3ms	Cas Medical Systems Inc	CAS	PRK300	Physiologic Monitoring System
0.083228	-0.440785	-0.29063	-1.1749	-0.372795	-0.0449093	0.0454851	0.658585	2	-0.106363	-0.0277165	South Korea	Lucon M20	Mediana Co Ltd	Mediana	PRK300	Physiologic Monitoring System
0.083228	-0.440785	-0.29063	-1.1749	-0.372795	-0.0449093	-0.187609	0.658585	2	-0.106363	-0.0277165	South Korea	Lucon M20	Mediana Co Ltd	Mediana	PRK300	Physiologic Monitoring System
0.083228	-0.440785	-0.29063	-1.1749	-0.372795	-0.0449093	0.975272	0.658585	2	0.583828	-0.146044	Germany	IntelliVue MP5	Philips MedizinSysteme GmbH	IntelliVue	PRK300	Physiologic Monitoring System
-0.725432	-0.440785	-0.29063	-1.1749	-0.372795	-0.0449093	-0.261986	0.658585	2	-0.106363	0.776392	China	Mindray iMEC8	Shenzhen Mindray Bio-Medical Electronics Co Ltd	Mindray	PRK300	Physiologic Monitoring System
-0.725432	-0.440785	-0.29063	-1.1749	-0.372795	-0.0449093	-0.330369	0.658585	2	-0.106363	0.776392	China	Mindray iMEC8	Shenzhen Mindray Bio-Medical Electronics Co Ltd	Mindray	PRK300	Physiologic Monitoring System
-0.725432	-0.440785	-0.29063	-1.1749	-0.372795	-0.0449093	-0.330369	0.658585	2	-0.106363	0.776392	China	Mindray iMEC8	Shenzhen Mindray Bio-Medical Electronics Co Ltd	Mindray	PRK300	Physiologic Monitoring System
-0.725432	-0.440785	-0.29063	-1.1749	-0.372795	-0.0449093	-0.328886	0.658585	2	-0.106363	0.776392	China	Mindray iMEC8	Shenzhen Mindray Bio-Medical Electronics Co Ltd	Mindray	PRK300	Physiologic Monitoring System
-0.725432	-0.440785	-0.29063	-1.1749	-0.372795	-0.0449093	-0.241656	0.658585	2	-0.106363	0.776392	China	Mindray iMEC8	Shenzhen Mindray Bio-Medical Electronics Co Ltd	Mindray	PRK300	Physiologic Monitoring System
-0.725432	-0.440785	-0.29063	-1.1749	-0.372795	-0.0449093	0.682147	0.658585	2	-0.106363	0.776392	China	Mindray iMEC8	Shenzhen Mindray Bio-Medical Electronics Co Ltd	Mindray	PRK300	Physiologic Monitoring System
-0.725432	-0.440785	-0.29063	-1.1749	-0.372795	-0.0449093	-0.328187	0.658585	2	-0.106363	0.776392	China	Mindray iMEC8	Shenzhen Mindray Bio-Medical Electronics Co Ltd	Mindray	PRK300	Physiologic Monitoring System
-0.725432	-0.440785	-0.29063	-1.1749	-0.372795	-0.0449093	-0.330369	0.658585	2	-0.106363	0.776392	China	Mindray iMEC8	Shenzhen Mindray Bio-Medical Electronics Co Ltd	Mindray	PRK300	Physiologic Monitoring System
-0.725432	-0.440785	-0.29063	-1.1749	-0.372795	-0.0449093	-0.327791	0.658585	2	-0.106363	0.776392	China	Mindray iMEC8	Shenzhen Mindray Bio-Medical Electronics Co Ltd	Mindray	PRK300	Physiologic Monitoring System
-0.725432	-0.440785	-0.29063	-1.1749	-0.372795	-0.0449093	-0.263707	0.658585	2	-0.106363	0.776392	China	Mindray iMEC8	Shenzhen Mindray Bio-Medical Electronics Co Ltd	Mindray	PRK300	Physiologic Monitoring System
-0.0515487	-0.440785	-0.29063	-1.1749	-0.372795	-0.0449093	-0.287868	0.658585	2	-0.106363	-0.0132046	China	Mindray Ipm9800	Shenzhen Mindray Bio-Medical Electronics Co Ltd	Mindray	PRK300	Physiologic Monitoring System
-0.0515487	-0.440785	-0.29063	-1.1749	-0.372795	-0.0449093	0.0792485	0.658585	2	-0.106363	-0.0132046	China	Mindray Ipm9800	Shenzhen Mindray Bio-Medical Electronics Co Ltd	Mindray	PRK300	Physiologic Monitoring System
1.43099	-0.440785	-0.29063	-1.1749	-0.372795	-0.0449093	0.870944	0.658585	2	0.614409	-1.42198	USA	Atlas 622no	Welch Allyn Inc	Atlas	PRK300	Physiologic Monitoring System
-0.455879	-0.440785	-0.29063	-1.1749	-0.372795	-0.0449093	-0.288558	0.658585	2	-0.106363	0.521503	USA	Propaq CS 242	Welch Allyn Inc	Propaq	PRK300	Physiologic Monitoring System
-0.455879	-0.440785	-0.29063	-1.1749	-0.372795	-0.0449093	-0.33012	0.658585	2	-0.106363	0.521503	USA	Propaq CS 242	Welch Allyn Inc	Propaq	PRK300	Physiologic Monitoring System
-0.455879	-0.440785	-0.29063	-1.1749	-0.372795	-0.0449093	-0.269186	0.658585	2	-0.106363	0.521503	USA	Propaq CS 242	Welch Allyn Inc	Propaq	PRK300	Physiologic Monitoring System
[truncated: 6,294 more rows]
